# Supplementary material for: Multicancer analyses of short tandem repeat variations reveal shared gene regulatory mechanisms
Source: Research Square preprint supplement (doi:10.21203/rs.3.rs-5775561/v1), 2025-01-09
Supplement: Supplementary file 2 [file additional_file_2.xlsx]

## Sheet: CRC
gene	str_id	coef	intercept	p_value	adj_p
BLOC1S2	chr10_100275426	-0.0605358	1.0929	0.00338951	0.0363224
OGA	chr10_101807909	0.0510238	0.275926	2.57562e-05	0.000828814
ARL3	chr10_102714290	-0.05968	0.76695	0.000549173	0.0094053
ACSL5	chr10_112394905	0.155408	0.0256121	4.61038e-08	4.4724e-06
ACSL5	chr10_112408299	0.0487643	0.802225	0.00292076	0.0328678
ABLIM1	chr10_114444145	-0.0450274	2.17394	0.00518199	0.0489819
PROSER2	chr10_11870854	0.115659	-1.06721	0.0029701	0.0331303
PSTK	chr10_122986229	-0.0263105	0.0388334	1.43819e-07	1.17985e-05
ACADSB	chr10_123053170	-0.130883	1.74517	0.00166782	0.0219544
LRRC27	chr10_132344477	-0.109369	0.577357	7.01802e-05	0.00185058
PHYH	chr10_13301858	0.0951729	-0.438377	4.95637e-05	0.00140664
PRPF18	chr10_13591929	-0.0202963	0.239554	0.00136241	0.0188593
FAM107B	chr10_14530300	-0.154095	1.93454	2.77027e-05	0.000878686
RSU1	chr10_16782087	0.0783365	-0.700708	5.95368e-06	0.000257734
CUBN	chr10_17122774	-0.0282232	-0.464386	0.00305415	0.0339095
TRDMT1	chr10_17160377	-0.0312891	0.0496224	0.0031593	0.0345573
TRDMT1	chr10_17162248	-0.0357216	0.514788	1.76905e-05	0.000613854
NEBL	chr10_20868835	0.0792537	-0.606596	9.76989e-05	0.00246038
NEBL	chr10_21172482	0.0346304	-0.156391	0.00114222	0.016554
KIAA1217	chr10_24495086	0.0391362	0.0234825	0.000171569	0.00380887
ARHGAP21	chr10_24670183	-0.324656	3.29938	2.4954e-07	1.87367e-05
APBB1IP	chr10_26513705	-0.0348663	0.287947	0.00128545	0.0180779
MASTL	chr10_27165243	-0.0710987	0.699335	0.00384319	0.039717
MPP7	chr10_28089898	0.119821	-0.924868	0.00194033	0.0246059
MTPAP	chr10_30316241	-0.0473265	0.777116	1.55149e-10	4.48244e-08
KIF5B	chr10_32038110	0.0497025	0.724558	0.00122493	0.0173886
KIF5B	chr10_32040555	0.169568	-0.222707	1.56322e-06	8.41102e-05
ERCC6	chr10_49476345	-0.0521203	0.244609	0.00316553	0.0345686
A1CF	chr10_50841764	0.179446	-1.65226	0.000652468	0.0108121
GDI2	chr10_5811961	0.0252495	1.2517	2.31314e-06	0.000118694
RTKN2	chr10_62262824	-0.0784462	0.44807	1.39331e-08	1.6682e-06
JMJD1C	chr10_63189521	-0.226212	2.38284	0.00122074	0.0173514
PBLD	chr10_68296863	0.0522601	-0.443173	0.000604884	0.010163
ANXA7	chr10_73376076	0.0430953	0.746006	0.000214434	0.00450209
ANXA7	chr10_73387847	0.0181515	0.903195	0.00141035	0.0194032
ANXA11	chr10_80166227	0.0851407	0.425023	1.49819e-05	0.000535239
RNLS	chr10_88274911	0.131657	-1.66539	0.000121856	0.00296063
TNKS2	chr10_91819247	0.0253772	0.254965	8.97166e-05	0.00229879
TNKS2	chr10_91842189	0.165467	-0.962066	2.91098e-12	1.43285e-09
KIF11	chr10_92606591	-0.0402031	1.4065	6.66128e-06	0.000281938
TBC1D12	chr10_94493352	-0.131676	1.09201	0.000186535	0.00405736
HELLS	chr10_94558082	-0.0624911	0.554413	0.000320573	0.00615666
HELLS	chr10_94571548	-0.143848	1.22611	5.6925e-05	0.0015794
HELLS	chr10_94593666	-0.0740335	1.10404	0.000138958	0.0032628
TM9SF3	chr10_96565481	0.0576834	0.834587	0.000884563	0.0135436
TM9SF3	chr10_96576857	0.0480584	0.903341	0.00226612	0.02763
YAP1	chr11_102185992	0.0679117	-0.0465632	1.13453e-09	2.15399e-07
YAP1	chr11_102209595	0.0641601	0.0534167	2.27185e-06	0.000117482
MMP20	chr11_102594772	0.278873	-6.53534	8.48328e-06	0.000338567
DYNC2H1	chr11_103152110	-0.0439361	0.106329	5.64925e-05	0.00157324
NPAT	chr11_108188043	-0.0258343	0.344438	0.000292115	0.00577819
C11orf65	chr11_108317540	-0.141742	0.958833	0.00386039	0.0398637
ALG9	chr11_111870383	-0.00948293	-0.0716298	0.0013123	0.0183584
TTC12	chr11_113360052	-0.0171615	0.25827	4.98015e-06	0.000220941
NXPE1	chr11_114527906	-0.146602	1.59902	0.000290607	0.00576442
SCN2B	chr11_118176520	0.654315	-6.9727	2.38826e-05	0.000777941
CENATAC	chr11_119013171	-0.0395453	0.38504	0.00402471	0.0410187
TRAPPC4	chr11_119017259	-0.078509	1.27087	0.000309425	0.00597712
TRAPPC4	chr11_119018676	0.0419864	0.112009	3.64359e-05	0.00108088
CRTAM	chr11_122867355	-0.161814	1.38535	0.00056091	0.00958161
VSIG2	chr11_124754810	-0.223527	3.97779	0.00260755	0.0305106
ARNTL	chr11_13360519	-0.0535784	0.335422	2.05193e-05	0.000692135
PSMA1	chr11_14517770	-0.0287116	0.699223	0.00350403	0.0371657
SOX6	chr11_16095915	-0.0477789	0.226627	0.00324735	0.0353169
SAAL1	chr11_18090326	-0.0271596	0.736103	0.00157996	0.0211032
LGR4	chr11_27392525	-0.047107	1.40135	0.000581984	0.00985296
BDNF	chr11_27659149	-0.147416	0.481232	0.0018988	0.0242179
ARL14EP	chr11_30336487	0.0296021	-0.168847	0.00173641	0.0226466
ELP4	chr11_31789913	-0.0206054	0.0663483	1.11055e-06	6.3635e-05
TCP11L1	chr11_33105858	-0.14333	1.07928	1.27766e-07	1.06793e-05
PDHX	chr11_34931532	-0.0304746	1.22762	3.39287e-06	0.000166389
PRR5L	chr11_36403464	0.0363253	-0.0488843	0.00138041	0.0190505
ARFGAP2	chr11_47165521	0.0478972	0.333073	1.95153e-05	0.000662944
TRIM5	chr11_5666091	-0.0179034	0.494942	0.00348745	0.0370786
MED19	chr11_57704670	-0.0110505	0.70072	0.00238431	0.0285433
PRPF19	chr11_60898938	0.0885087	0.821343	0.00166724	0.0219544
CTSW	chr11_65880326	-0.177607	1.65563	2.20103e-05	0.000729469
RAB1B	chr11_66268823	0.0758531	0.508253	0.0020296	0.0254466
ANO1	chr11_70152335	-0.0659939	1.78048	0.00487813	0.0471151
PPFIA1	chr11_70326577	-0.0390308	0.552554	0.00349498	0.0371221
RAB6A	chr11_73718903	0.0396914	0.303471	0.00191378	0.0243499
C2CD3	chr11_74042224	-0.0165226	0.21339	0.0011584	0.0166795
XRRA1	chr11_74933991	-0.0688889	0.101517	0.00143826	0.0196449
NDUFC2	chr11_78073101	0.161909	-0.998178	1.70437e-15	3.23587e-12
RIC3	chr11_8138416	-0.296321	2.84622	0.00466095	0.0455806
DLG2	chr11_83469127	-0.0390714	-0.388746	5.61535e-06	0.000245487
TMEM135	chr11_87157320	-0.0370879	0.363759	0.000104692	0.00261042
CTSC	chr11_88335085	-0.0475602	1.24702	0.0051573	0.0488181
CHORDC1	chr11_90218200	-0.0562843	0.659203	0.00262489	0.0306276
CEP295	chr11_93729980	-0.0213457	0.0845996	7.22242e-05	0.00189321
IPO7	chr11_9409910	0.0880628	0.413032	0.00403802	0.0411228
IPO7	chr11_9438046	0.0115471	0.962735	0.00134615	0.0187138
MRE11	chr11_94479765	0.0954439	-0.764615	1.09221e-08	1.36939e-06
PIWIL4	chr11_94616469	0.109772	-1.67863	8.16784e-05	0.00212428
DEPDC4	chr12_100263385	-0.0778624	0.297732	0.00400399	0.0409016
MYBPC1	chr12_101646639	0.742316	-7.41016	0.00351526	0.0372254
CHPT1	chr12_101734905	0.140132	-0.663471	0.000325094	0.0061987
SYCP3	chr12_101737313	-0.0820891	0.302444	0.000467263	0.00825789
GNPTAB	chr12_101765329	-0.0793283	1.25604	0.00431611	0.0431459
STAB2	chr12_103683332	-0.0472885	-0.250309	4.36993e-06	0.000200956
STAB2	chr12_103692959	-0.0528525	-0.339898	0.00214456	0.0265622
HCFC2	chr12_104067934	-0.0447064	0.244183	4.04437e-06	0.000189259
CHST11	chr12_104602023	-0.0315376	0.321834	0.00164556	0.0217606
C12orf45	chr12_105070824	-0.0417159	0.0885716	0.000681463	0.011163
POLR3B	chr12_106427180	-0.0223592	0.377018	0.000544402	0.00935977
RIC8B	chr12_106843837	-0.0400553	0.34683	3.83102e-06	0.000181837
TMEM263	chr12_106967099	-0.127944	1.7654	1.19768e-08	1.47381e-06
CRY1	chr12_107000154	-0.0502915	0.750442	0.000128836	0.00306301
CRY1	chr12_107005085	-0.0384419	0.716481	0.00205869	0.0257384
CMKLR1	chr12_108293673	-0.0286585	0.20482	1.5425e-06	8.33325e-05
USP30	chr12_109072282	0.0354667	-0.230476	0.000256704	0.00518028
ANAPC7	chr12_110396226	0.0144481	0.277018	0.00212681	0.0264161
ARPC3	chr12_110435323	0.0402133	0.922697	0.000434747	0.00780999
FAM216A	chr12_110472976	-0.0120937	0.0763494	0.00231469	0.0280678
NAA25	chr12_112053679	-0.0722963	0.738734	0.00107037	0.0157185
MED13L	chr12_115980955	0.0621542	-0.625377	0.000193452	0.00417558
RFC5	chr12_118025849	-0.0383388	1.09341	6.92583e-08	6.39196e-06
RNF10	chr12_120528806	0.0191747	0.822607	0.00249779	0.0296389
P2RX7	chr12_121180469	-0.0561141	0.475776	0.0033362	0.0359595
ZCCHC8	chr12_122477791	-0.0459794	0.809855	2.16704e-07	1.65517e-05
KNTC1	chr12_122603273	-0.0256826	0.383191	0.000641096	0.0106502
MPHOSPH9	chr12_123181219	-0.171457	2.38633	0.00106762	0.0156955
MPHOSPH9	chr12_123194625	-0.0301752	0.266436	2.02781e-09	3.3271e-07
MPHOSPH9	chr12_123218528	-0.0873896	1.10217	1.34902e-06	7.43919e-05
DNAH10	chr12_123757912	-0.0625449	-0.121656	6.66185e-05	0.00177783
DNAH10	chr12_123881604	-0.0962766	0.280056	0.00147319	0.0199911
NCOR2	chr12_124325378	0.0321809	0.343006	0.00164032	0.021713
H2AJ	chr12_14775537	0.109725	-0.0480375	0.00382995	0.0396418
H2AJ	chr12_14777095	0.233572	-1.1964	1.22774e-07	1.0327e-05
CMAS	chr12_22062261	0.028728	0.904694	0.000751103	0.0120412
RHNO1	chr12_2887893	0.0424371	0.0954957	0.000765934	0.0121907
IPO8	chr12_30669293	-0.0801482	1.5942	0.000166188	0.0037308
ETFBKMT	chr12_31667631	-0.0621887	0.229636	1.0366e-09	2.08733e-07
FGD4	chr12_32608104	-0.119203	1.63708	0.000222058	0.00461118
FGD4	chr12_32619632	-0.133898	1.20019	0.00130543	0.0182816
ABCD2	chr12_39607746	-0.072594	0.686077	0.000723588	0.0117131
SLC2A13	chr12_39864886	-0.0407214	0.239784	0.000454736	0.0081229
GXYLT1	chr12_42109524	-0.0146841	0.338539	0.00496282	0.047725
C12orf4	chr12_4535996	-0.0340228	0.391801	0.00109904	0.0160509
ARID2	chr12_45893388	-0.0423022	0.40395	0.00101718	0.0151381
RPAP3	chr12_47701281	0.285048	-2.24602	0.00104975	0.0154967
CCNT1	chr12_48698186	-0.0281709	0.753976	7.17558e-06	0.000298011
TMBIM6	chr12_49759165	0.161648	0.491257	0.00267379	0.0309143
PFDN5	chr12_53299137	-0.0183015	-0.14871	0.00136375	0.0188593
NCKAP1L	chr12_54532088	-0.0282616	0.328461	0.00508009	0.0483281
RAB5B	chr12_55987167	0.0307071	0.826743	0.00340826	0.03647
ZC3H10	chr12_56117139	-0.0175826	-0.0486655	0.00115441	0.0166492
PAN2	chr12_56327636	-0.0746476	0.875504	0.00295851	0.0330686
DCTN2	chr12_57535462	0.0414506	0.365949	0.0015118	0.020377
TSFM	chr12_57783597	-0.0625763	0.175124	2.15214e-06	0.000113051
USP15	chr12_62384319	-0.0280138	0.669694	0.00142629	0.0195417
USP15	chr12_62392052	-0.0445983	0.401319	0.00136513	0.0188593
SRGAP1	chr12_64097223	-0.0297303	0.0718756	6.0437e-05	0.00164592
XPOT	chr12_64418975	0.184619	-0.845815	5.02935e-07	3.28685e-05
TBK1	chr12_64464321	-0.0545561	0.522949	0.00283491	0.03229
MSRB3	chr12_65368924	0.0779446	-0.817247	6.78804e-05	0.00180641
NOP2	chr12_6561989	-0.0437012	-0.0966308	3.89451e-07	2.70984e-05
LLPH	chr12_66128849	-0.0308095	0.477992	2.64481e-07	1.97469e-05
MDM1	chr12_68302882	-0.0189475	0.312546	0.00424765	0.0426691
RAP1B	chr12_68648675	-0.0618261	0.846753	4.43474e-08	4.39712e-06
RAP1B	chr12_68656567	-0.0553192	0.731867	4.28553e-05	0.00124901
MDM2	chr12_68820302	-0.10938	1.27632	2.3869e-08	2.60016e-06
ATN1	chr12_6936717	0.0144303	1.14282	0.000256892	0.00518028
ZFC3H1	chr12_71626210	0.0389716	-0.366774	0.000442895	0.00794343
RAB21	chr12_71774045	-0.0662111	0.783979	4.40557e-05	0.00127839
TRHDE	chr12_72618870	0.219664	-3.44754	2.23537e-05	0.000739006
ATP2B1	chr12_89611385	-0.0525731	0.981366	0.0030744	0.0340206
ATP2B1	chr12_89621803	-0.0389648	0.899048	0.000693511	0.0113089
FGD6	chr12_95104972	-0.0269738	0.438562	0.00146696	0.0199345
APAF1	chr12_98723620	-0.022857	0.596447	0.00294838	0.0330388
TMTC4	chr13_100656543	0.0346173	-0.170727	0.000861216	0.0132828
CUL4A	chr13_113244840	0.0564908	0.161869	0.000240205	0.00490373
LAMP1	chr13_113310688	0.0972647	0.457756	0.000296047	0.00580305
TFDP1	chr13_113585753	0.0422207	0.73772	0.00315572	0.0345466
CDC16	chr13_114236623	0.0663681	0.222999	0.0017146	0.0224717
CDC16	chr13_114238860	0.124325	-0.26335	5.71895e-05	0.00158343
CDC16	chr13_114243499	0.118262	-0.258844	4.70314e-06	0.000213327
CDC16	chr13_114246076	0.115194	-0.403442	5.06595e-09	7.39851e-07
MPHOSPH8	chr13_19642041	0.0307914	0.35718	0.00023398	0.00479877
ZMYM2	chr13_20059331	0.0961333	-0.777227	3.63573e-05	0.00108088
ZMYM2	chr13_20059684	0.163986	-1.2481	5.33607e-07	3.40944e-05
ZMYM2	chr13_20081999	0.116474	-0.987764	1.82161e-09	3.14406e-07
ZDHHC20	chr13_21378769	0.0490778	0.465119	4.67386e-06	0.000212724
LNX2	chr13_27559820	0.0731958	-0.495546	1.77431e-11	7.60665e-09
POMP	chr13_28664486	0.109622	0.622966	3.12606e-06	0.000154444
HMGB1	chr13_30621273	0.0714447	0.522163	0.00106219	0.0156329
USPL1	chr13_30621273	0.0592417	-0.342322	0.00325918	0.0353876
HSPH1	chr13_31148484	0.175541	-1.63428	4.79475e-28	6.37222e-24
PDS5B	chr13_32741052	0.0225646	-0.184752	3.61711e-05	0.00108025
PDS5B	chr13_32770750	0.0879997	-0.707732	0.00122597	0.0173886
PDS5B	chr13_32775098	0.0134774	0.0201493	0.0022134	0.0271953
RFC3	chr13_33823926	0.242936	-1.6867	1.57187e-08	1.86519e-06
EXOSC8	chr13_37005863	0.016626	0.37867	0.00103356	0.0152942
SUPT20H	chr13_37021978	0.0805697	-0.583185	2.83028e-05	0.000888014
FREM2	chr13_38872997	0.596039	-5.96729	0.00391503	0.0402948
COG6	chr13_39724484	0.0298626	-0.302839	0.00307044	0.0340206
ELF1	chr13_40942890	0.174753	-0.491755	0.00289534	0.0326661
ELF1	chr13_41065290	0.0464301	0.246044	2.08164e-08	2.34449e-06
WBP4	chr13_41065290	0.0213308	0.0822554	0.00328411	0.0355956
MTRF1	chr13_41252555	0.0828966	-0.61274	0.00295578	0.0330659
NUFIP1	chr13_44982157	0.0695892	-0.513035	9.34328e-06	0.000365212
KPNA3	chr13_49732688	0.0835472	-0.10592	2.84095e-05	0.000888014
KCNRG	chr13_50011916	-0.188357	1.40839	1.07798e-08	1.36441e-06
KCNRG	chr13_50013519	-0.063028	0.427932	0.00360189	0.0379012
DHRS12	chr13_51791272	0.0339885	-0.654243	4.96398e-05	0.00140664
NEK3	chr13_52133617	0.0160784	0.307818	0.00507196	0.0482853
NEK3	chr13_52152573	0.0986707	-0.517076	0.000157197	0.00359577
VPS36	chr13_52415926	0.106167	-1.49911	0.00263726	0.0306642
VPS36	chr13_52433752	0.117693	-0.499406	2.39237e-10	6.35892e-08
VPS36	chr13_52436219	0.021327	0.184841	2.93481e-06	0.000147488
PCDH17	chr13_57632451	-0.0271714	-0.181095	0.00367162	0.0384825
PIBF1	chr13_72973578	0.0680212	-0.457046	0.00201844	0.0253849
KLF5	chr13_73063984	0.0307931	1.15738	7.41727e-05	0.00194046
KLF5	chr13_73075617	0.114943	0.221142	0.0018329	0.0236048
SLAIN1	chr13_77742920	-0.0896195	0.641679	0.0037785	0.0392315
RBM26	chr13_79369032	0.0971618	-0.664515	1.8155e-05	0.000625076
RBM26	chr13_79371937	0.0385705	-0.121357	2.09164e-05	0.000703744
NDFIP2	chr13_79521009	0.0709988	0.215836	5.9672e-05	0.00163514
IPO5	chr13_97982484	0.0625888	0.408069	0.000117081	0.00286557
DOCK9	chr13_98888144	0.139373	-1.54659	0.000851687	0.0131922
UBAC2	chr13_99314263	0.0373004	0.499972	9.45734e-10	1.99505e-07
MARK3	chr14_103498471	-0.0142796	0.260743	0.00260711	0.0305106
KLC1	chr14_103574079	-0.0115183	-0.0154061	1.95616e-08	2.28047e-06
TDRD9	chr14_103998792	-0.117378	0.622954	0.000346658	0.00655346
TTC5	chr14_20295661	-0.0510339	0.652953	6.91573e-06	0.000290639
PSMB5	chr14_23027652	0.0626604	0.846309	0.000754042	0.0120738
SCFD1	chr14_30722463	-0.0285316	0.203562	1.62214e-08	1.90781e-06
STRN3	chr14_30955585	-0.0367385	0.739912	0.00428344	0.0428989
NUBPL	chr14_31673280	0.086383	-0.744989	0.000797118	0.0125518
NUBPL	chr14_31673339	0.0351033	-0.348926	4.30325e-10	1.03788e-07
CFL2	chr14_34713143	-0.0518275	0.541953	0.00222228	0.0271953
SRP54	chr14_35008885	-0.0151196	0.727643	0.000123642	0.00298221
BRMS1L	chr14_35863976	-0.0739701	0.495688	0.00143788	0.0196449
MIPOL1	chr14_37309689	-0.0612115	0.541063	0.0021395	0.0265365
GEMIN2	chr14_39124931	-0.040681	0.540652	0.00236772	0.0284512
TRAPPC6B	chr14_39151681	-0.0373643	0.109407	0.00022443	0.00463869
KLHL28	chr14_44931210	-0.030529	0.39485	0.00480547	0.0466753
KLHL28	chr14_45044624	-0.0885397	0.67911	0.00298215	0.0331933
PRPF39	chr14_45096296	-0.0129107	0.49301	0.00280902	0.032072
MIS18BP1	chr14_45246816	0.0587932	-0.438665	0.000231097	0.0047543
POLE2	chr14_49679830	-0.0473755	0.842132	0.00338948	0.0363224
L2HGDH	chr14_50294251	-0.0734791	0.743596	0.000168348	0.00376656
PYGL	chr14_50881564	-0.0366319	1.05886	0.00434475	0.0433172
ERO1A	chr14_52682237	-0.317312	3.76612	0.0051796	0.0489819
STYX	chr14_52768828	-0.0460581	0.598651	6.04448e-06	0.000260816
DDHD1	chr14_53055921	-0.0433458	0.171307	0.00271552	0.0311224
WDHD1	chr14_54963185	-0.033705	0.442202	9.82712e-06	0.000381878
WDHD1	chr14_55008794	-0.095332	2.37202	4.0279e-06	0.000189155
LGALS3	chr14_55145289	0.0962762	1.0639	0.000563566	0.00961463
DLGAP5	chr14_55169343	-0.0316964	0.944382	3.60928e-09	5.45084e-07
ARMH4	chr14_58004661	-0.0483629	-0.0226203	0.00235259	0.0283206
ARMH4	chr14_58208106	-0.0373163	-0.0633843	0.00344109	0.0367327
JKAMP	chr14_59495255	-0.0260739	0.627056	0.00287917	0.0326126
PCNX4	chr14_60114682	-0.0833229	0.805731	0.000192869	0.00417463
PCNX4	chr14_60121157	-0.0177067	0.26697	2.84455e-05	0.000888014
PCNX4	chr14_60150197	-0.0150955	0.014536	3.69805e-06	0.000178069
HIF1A	chr14_61727395	-0.145767	2.2741	0.00243226	0.0289908
HIF1A	chr14_61738031	-0.0412338	1.50122	7.12328e-05	0.00187462
ESR2	chr14_64224927	-0.100951	0.37817	7.91823e-08	7.11035e-06
MTHFD1	chr14_64400961	-0.0499765	0.896719	0.00317378	0.0346302
ZBTB25	chr14_64473780	-0.150618	1.01091	0.0032516	0.0353343
FNTB	chr14_65006157	-0.0201902	0.195418	3.03317e-06	0.000151545
ATP6V1D	chr14_67316768	0.0814448	-0.135512	3.51892e-05	0.00105806
PLEKHH1	chr14_67561870	-0.0374012	0.790337	0.00267904	0.0309143
RAD51B	chr14_68115543	-0.0125774	-0.061238	0.00432109	0.0431459
RAD51B	chr14_68468039	-0.0338303	0.172519	0.000158894	0.00362212
EXD2	chr14_69209825	-0.0156004	0.510022	0.000458157	0.00815114
COQ6	chr14_73959582	-0.0446605	0.245477	1.54489e-05	0.000545968
ENTPD5	chr14_73959582	0.113968	-0.932975	8.24311e-06	0.000331972
ALDH6A1	chr14_74067572	-0.113617	1.12205	0.000126251	0.00302697
DLST	chr14_74889368	-0.0204466	1.53514	0.000309401	0.00597712
ZC2HC1C	chr14_75107513	-0.0589309	0.161112	0.00337938	0.0363224
TTLL5	chr14_75771912	-0.0514479	0.626064	0.000244761	0.0049738
ZC3H14	chr14_88620935	-0.0174379	0.254411	5.85746e-07	3.68937e-05
EML5	chr14_88620935	-0.083891	-0.138734	0.00247785	0.029455
RPS6KA5	chr14_90899303	-0.0151259	-0.175726	0.00118871	0.016987
RPS6KA5	chr14_90906342	-0.0258793	-0.092522	0.00130252	0.01826
RPS6KA5	chr14_91001050	-0.0508903	0.0618072	0.000137859	0.00324273
RPS6KA5	chr14_91001178	-0.0408333	-0.0225667	0.0024452	0.029119
DGLUCY	chr14_91173268	-0.0701714	1.38279	0.00046519	0.00823219
CATSPERB	chr14_91723202	-0.0811353	0.659714	0.000318218	0.00612029
TC2N	chr14_91792562	-0.163722	3.54295	0.00123466	0.0174746
TC2N	chr14_91797737	-0.186128	4.17596	8.31399e-10	1.78214e-07
TRIP11	chr14_91974786	-0.0308558	0.438625	0.00221719	0.0271953
DICER1	chr14_95099733	0.0202862	-0.0529213	0.00480801	0.0466753
ATG2B	chr14_96304616	-0.0142838	0.0809736	0.00184114	0.0236526
ATG2B	chr14_96322277	-0.0594966	0.424919	8.69239e-05	0.00224751
ATG2B	chr14_96332215	-0.0305676	0.613471	0.00146164	0.0199028
GSKIP	chr14_96382229	-0.0871515	2.04547	0.000144149	0.00335505
AK7	chr14_96437808	-0.321843	2.53648	3.42284e-07	2.44567e-05
AK7	chr14_96449896	-0.0518936	0.347664	6.93247e-06	0.000290639
TARS3	chr15_101715044	-0.0589123	0.587934	0.000184417	0.00402448
CYFIP1	chr15_22914923	0.167333	-0.567739	0.00252987	0.0298332
ARHGAP11A	chr15_32635759	-0.0870888	1.06927	0.00041553	0.00754426
RYR3	chr15_33631302	-0.0710355	-0.142864	0.000913439	0.0139216
RYR3	chr15_33860497	-0.0452474	-0.414816	0.00202533	0.0254171
SLC12A6	chr15_34251098	-0.0600507	0.581128	0.000100449	0.00251846
MEIS2	chr15_36950240	-0.0556471	0.234746	0.00105177	0.0154967
MEIS2	chr15_37099552	-0.0559344	0.108937	0.00141465	0.0194263
FSIP1	chr15_39764032	0.0724701	-1.52632	0.00446636	0.0442639
KNL1	chr15_40650518	-0.0530889	0.589837	6.10988e-08	5.80002e-06
KNL1	chr15_40659264	-0.0620634	1.09842	1.34087e-05	0.000486888
MGA	chr15_41698839	-0.0288259	0.269532	0.00522141	0.0492845
UBR1	chr15_43015642	-0.0439561	0.652222	8.18178e-06	0.000330653
ELL3	chr15_43775276	-0.166213	0.75907	6.23281e-07	3.88892e-05
GOLM2	chr15_44379619	-0.0290621	1.3163	0.0044331	0.0440328
CTDSPL2	chr15_44486759	-0.0174817	0.387798	0.000774347	0.0122805
EIF3J	chr15_44560236	0.0544239	0.643995	0.00141495	0.0194263
B2M	chr15_44711583	0.262068	0.652629	2.6784e-05	0.000855673
TRIM69	chr15_44736722	-0.0767509	1.05377	1.34407e-08	1.62388e-06
FAM227B	chr15_49328775	-0.0704399	0.45756	0.0001595	0.00362972
USP8	chr15_50490238	-0.0236089	0.307817	0.00525846	0.0495989
DMXL2	chr15_51453436	-0.0576866	0.450972	0.00056821	0.00968143
DMXL2	chr15_51476559	-0.0579981	0.495305	1.48189e-06	8.10465e-05
MYO5C	chr15_52214741	-0.0340215	0.781028	0.000171958	0.00380887
MYO5C	chr15_52269695	-0.0594276	1.16907	0.000110229	0.00271673
MYO5A	chr15_52348794	-0.0341697	0.104983	1.93852e-07	1.52444e-05
FAM214A	chr15_52611107	-0.0567762	0.340047	0.000399614	0.00732534
RAB27A	chr15_55321208	-0.0388649	0.791529	3.21079e-05	0.000980953
PIGB	chr15_55321208	-0.0194502	0.164337	0.000161508	0.00365662
CCPG1	chr15_55385568	-0.101835	0.828272	0.00251009	0.0297053
TEX9	chr15_56277959	-0.0695152	0.737392	0.0044876	0.0443751
TEX9	chr15_56428352	-0.0793649	0.287186	0.00122966	0.0174223
ZNF280D	chr15_56654506	-0.0410642	0.142009	8.18547e-06	0.000330653
ZNF280D	chr15_56682487	-0.0180932	0.0710745	1.00221e-06	5.82741e-05
ADAM10	chr15_58599751	-0.0606686	1.10625	0.000362982	0.00676582
ADAM10	chr15_58682151	-0.055506	1.05256	0.000478218	0.00840677
ADAM10	chr15_58717732	-0.0427713	0.882158	0.00184392	0.0236541
MINDY2	chr15_58802296	-0.0384397	0.307639	4.98737e-06	0.000220941
CCNB2	chr15_59123690	-0.0657999	1.66691	0.00451509	0.0445145
FAM81A	chr15_59514275	-0.0935644	1.0176	1.00412e-06	5.82741e-05
GTF2A2	chr15_59650605	-0.090619	1.60808	0.00222214	0.0271953
ICE2	chr15_60453583	-0.0717474	0.591409	5.429e-05	0.00152218
RPS27L	chr15_63155734	-0.0590567	1.35813	0.00029217	0.00577819
MTFMT	chr15_65020277	-0.0402763	0.780553	4.46088e-06	0.000203729
RPL4	chr15_66528809	0.0791584	1.26096	0.000940944	0.0142428
ZWILCH	chr15_66528809	-0.0868937	1.08738	1.84919e-05	0.000633395
IQCH	chr15_67360042	-0.0486706	0.0580896	0.000570096	0.00968872
HEXA	chr15_72355713	-0.0571833	0.444551	2.37219e-05	0.000774603
CCDC33	chr15_74243945	0.507393	-7.42168	0.00303759	0.033782
CTSH	chr15_78939176	0.0803558	-0.694331	0.00334997	0.0360495
HOMER2	chr15_82990544	-0.0457795	-0.438639	0.000294087	0.00579437
TM6SF1	chr15_83136458	-0.0575717	0.0609998	0.000828257	0.0129348
FANCI	chr15_89273512	-0.0169925	0.572497	7.90016e-06	0.000325056
TICRR	chr15_89582988	-0.0576358	0.622757	0.000178159	0.00391361
BLM	chr15_90769421	-0.103338	0.787302	0.00170346	0.0223485
MCTP2	chr15_94314437	-0.0234334	0.365533	0.000524824	0.00905833
TVP23A	chr16_10761665	-0.0649651	0.0967183	4.48301e-08	4.39712e-06
TVP23A	chr16_10773346	-0.102785	0.149864	1.31697e-05	0.000479522
GSPT1	chr16_11887022	0.0193667	0.876779	0.00406183	0.0411934
GSPT1	chr16_11891152	0.046343	0.519895	0.00232487	0.028137
MYH11	chr16_15798609	0.0505155	-0.791562	0.0001577	0.0036011
FAHD1	chr16_1828275	0.0235684	0.265821	0.00147414	0.0199911
FAHD1	chr16_1837877	-0.124276	1.98369	2.1713e-16	4.80943e-13
ITPRIPL2	chr16_19119477	-0.0555179	0.881206	0.00266755	0.0309082
SYT17	chr16_19172636	-0.0484063	0.080502	0.000123564	0.00298221
KNOP1	chr16_19714384	0.0572617	-0.529119	0.000355778	0.00666896
ERI2	chr16_20791928	-0.0329446	0.408575	1.14073e-06	6.45117e-05
ERI2	chr16_20799842	-0.0503069	0.470676	7.76549e-08	7.02064e-06
REXO5	chr16_20845312	-0.0445521	0.309732	0.00490008	0.0472584
PRKCB	chr16_24174495	-0.0470206	0.208163	9.25361e-06	0.000362774
CCNF	chr16_2431054	-0.105257	1.17336	2.84082e-05	0.000888014
RBBP6	chr16_24563371	0.0310409	-0.143531	1.38884e-06	7.62712e-05
QPRT	chr16_29665058	0.202914	-2.12431	0.00447742	0.0443074
QPRT	chr16_29668845	0.34546	-3.06525	2.00659e-09	3.3271e-07
QPRT	chr16_29669204	0.394896	-4.24897	3.2152e-14	3.28692e-11
QPRT	chr16_29669877	0.127868	-0.730083	3.77726e-06	0.000180575
BICDL2	chr16_3027705	0.0823234	-0.986775	0.00331286	0.035766
FUS	chr16_31191378	0.0539339	0.483275	6.5613e-07	4.07475e-05
ITGAX	chr16_31377314	-0.0377453	0.680557	0.00270493	0.0310864
MEFV	chr16_3244155	-0.122779	0.433692	0.0033218	0.0358333
NLRC3	chr16_3544163	-0.030894	0.0579038	0.000629822	0.010476
CREBBP	chr16_3758052	0.0236364	0.171243	0.000524041	0.00905657
DECR2	chr16_410794	0.0814535	-0.482653	0.00258359	0.0303183
PHKB	chr16_47547570	0.0458893	-0.00343889	0.00477278	0.0464971
GLYR1	chr16_4811103	0.0608788	0.1825	0.00375393	0.0391268
SEC14L5	chr16_4987498	-0.038864	-0.580559	0.000272263	0.00544116
MT1X	chr16_56684104	-0.0562368	1.08556	0.00252075	0.0297653
PSME3IP1	chr16_57154202	0.136474	-0.286746	0.00171792	0.0224717
CNOT1	chr16_58543412	0.0612758	0.216263	0.000119624	0.00291173
CNOT1	chr16_58551275	0.0754567	-0.18873	0.000177727	0.00391059
CNOT1	chr16_58560437	0.0837476	-0.0130686	8.9772e-05	0.00229879
LRRC36	chr16_67350158	0.109598	-1.97306	3.59384e-07	2.53058e-05
CYB5B	chr16_69459071	0.0715248	-0.249155	9.50542e-09	1.22648e-06
NFAT5	chr16_69653174	0.0626835	-0.570046	0.00208297	0.0259931
IL34	chr16_70659970	0.0863776	-1.13216	1.1185e-05	0.000423501
PSMD7	chr16_74302350	0.0727116	0.176633	6.45826e-05	0.00174098
GLG1	chr16_74496715	-0.0147741	1.15577	0.00401012	0.0409328
KARS1	chr16_75640355	0.0206803	1.10184	5.94406e-06	0.000257734
RBFOX1	chr16_7710845	0.228306	-4.53207	0.00255607	0.0300621
CENPN	chr16_81032555	-0.0392888	0.548381	1.19896e-05	0.000447869
USP7	chr16_8916970	0.025887	0.634889	5.38861e-08	5.18947e-06
ZSWIM7	chr17_15993796	-0.170882	1.80512	1.19971e-05	0.000447869
NCOR1	chr17_16153294	-0.0731969	1.8381	0.000862533	0.0132828
PIGL	chr17_16233931	-0.0360464	0.285467	0.00311829	0.0343632
PIGL	chr17_16349915	-0.100553	0.749647	0.0028395	0.03229
RAI1	chr17_17793780	-0.030379	0.671774	0.000846855	0.0131549
ATPAF2	chr17_18028571	-0.0301492	0.39016	1.88169e-09	3.20611e-07
AKAP10	chr17_19947374	-0.0339275	0.526104	0.00395803	0.0405568
TSR1	chr17_2335448	-0.0410659	1.28039	0.000492414	0.00856569
SGSM2	chr17_2335448	-0.0508723	0.823545	1.38945e-05	0.000503154
ATAD5	chr17_30830864	-0.039821	0.184822	0.000750419	0.0120412
ATAD5	chr17_30868427	-0.0381449	0.34344	2.76053e-06	0.000140028
ATAD5	chr17_30879566	-0.0520687	0.556279	0.00182038	0.0235111
CCT6B	chr17_34942755	-0.231985	1.60427	0.00168653	0.0221482
TAF15	chr17_35834733	0.0357007	0.183673	0.00148314	0.0200927
MRPL45	chr17_38322032	0.0426143	0.686164	0.0021658	0.0267504
MLLT6	chr17_38722649	0.0428109	0.373222	0.00265609	0.0308292
CDC6	chr17_40293443	-0.149495	1.83167	0.0038387	0.0397014
CDC6	chr17_40295488	-0.073039	1.78386	0.00115505	0.0166492
ACLY	chr17_41868672	0.139902	0.061056	0.000460888	0.00817785
NBR1	chr17_43209863	0.0420178	0.402151	0.00210652	0.0262131
TMEM106A	chr17_43209863	-0.0400761	0.316443	0.00418606	0.0421141
RPAIN	chr17_5421259	-0.0502348	0.49936	1.58362e-05	0.00055678
VPS53	chr17_562754	-0.0495145	0.88441	0.000795522	0.0125487
TRIM37	chr17_59064408	-0.0334519	0.573115	0.00124081	0.017543
BRIP1	chr17_61780239	-0.0420025	0.159008	0.000486931	0.0085037
CCDC47	chr17_63747038	0.104405	0.255088	0.00103457	0.0152942
ABCA10	chr17_69182836	-0.0836196	0.386322	6.16563e-05	0.00167227
NEURL4	chr17_7325146	-0.0503668	0.763775	0.00224293	0.0273975
RECQL5	chr17_75630842	0.0284754	-0.346992	0.00289418	0.0326661
RNF157	chr17_76212542	0.0686069	-0.868587	0.00338134	0.0363224
DNAH2	chr17_7797102	-0.0672071	0.737523	1.10505e-05	0.000419963
B3GNTL1	chr17_83035183	-0.0530902	0.365729	0.000945103	0.0142894
NAPG	chr18_10530668	-0.0484	1.14202	2.27272e-05	0.00074579
CEP76	chr18_12680597	-0.0397389	0.546032	0.000198616	0.00424374
SEH1L	chr18_12986804	-0.052026	0.825069	0.000865293	0.0133004
CEP192	chr18_12986804	-0.056317	0.645608	0.000185544	0.00404244
ESCO1	chr18_21539853	-0.0692594	1.02282	3.30119e-10	8.60252e-08
SNRPD1	chr18_21622930	-0.0426548	1.48801	0.000172758	0.00382023
IMPACT	chr18_24437927	-0.0554776	0.895032	0.00370748	0.0388277
SMCHD1	chr18_2674161	-0.0485517	0.631476	0.000335598	0.00635536
DSG1	chr18_31343816	0.160847	-2.48829	0.00481886	0.0467124
B4GALT6	chr18_31658114	-0.0298232	0.222729	0.00291454	0.0328256
TRAPPC8	chr18_31855816	-0.0178349	0.401966	0.000924303	0.0140549
GAREM1	chr18_32190206	-0.0508811	0.999281	0.00289546	0.0326661
RPRD1A	chr18_36031100	-0.0658885	2.19271	3.09952e-05	0.000951331
KIAA1328	chr18_36835395	-0.147798	0.835629	1.84346e-07	1.46704e-05
KIAA1328	chr18_36844193	-0.0339355	-0.0843263	0.0039706	0.040623
KIAA1328	chr18_36885537	-0.0322906	0.024035	9.16754e-07	5.43968e-05
EPG5	chr18_45865766	-0.0260095	0.295277	8.02373e-07	4.8692e-05
EPG5	chr18_45907921	-0.0301585	0.435905	1.106e-05	0.000419963
EPG5	chr18_45943921	-0.0667556	0.563845	0.0016216	0.0215581
PIAS2	chr18_46812342	-0.0534321	0.490263	2.42761e-06	0.000123613
PIAS2	chr18_46844143	-0.0467698	0.248433	0.00043443	0.00780999
PIAS2	chr18_46844689	-0.0992977	1.22969	0.000384006	0.00708811
PIAS2	chr18_46864254	-0.0562235	0.661698	0.000433542	0.00780999
IER3IP1	chr18_47156015	-0.06975	1.10292	0.000223503	0.00463278
DYM	chr18_49281954	-0.119964	1.20948	8.92549e-05	0.00229726
DYM	chr18_49363255	-0.0393039	0.462247	0.00111417	0.0162005
CFAP53	chr18_50261253	-0.0750108	1.14292	7.46447e-09	1.02271e-06
SMAD4	chr18_51058486	-0.0194557	0.430383	0.0025022	0.0296648
NEDD4L	chr18_58357165	-0.0234825	0.325307	0.00282896	0.032272
ALPK2	chr18_58607489	-0.142707	1.10753	0.00154664	0.020755
PIGN	chr18_62072730	-0.0300403	0.236326	2.50627e-11	1.03865e-08
PIGN	chr18_62140315	-0.0322766	0.24668	0.000455547	0.0081251
PIGN	chr18_62140376	0.0462079	-0.554598	0.00216532	0.0267504
RELCH	chr18_62227270	-0.0617195	0.703061	0.000193541	0.00417558
RELCH	chr18_62275354	-0.0655021	0.858155	9.6345e-15	1.28042e-11
RELCH	chr18_62275514	-0.0265191	0.419569	0.000261226	0.00524125
PHLPP1	chr18_62905205	-0.0579386	0.805239	0.00127775	0.0179963
TMX3	chr18_68700490	-0.0347306	0.689615	0.0006061	0.0101705
ARHGAP28	chr18_6870796	-0.133252	2.19493	0.00154921	0.020755
CD226	chr18_69946709	-0.0807773	0.414457	1.4724e-05	0.000528869
CD226	chr18_69947439	-0.0932573	0.246545	4.37333e-10	1.03788e-07
RTTN	chr18_70086695	-0.0181795	0.0722591	5.5927e-06	0.000245304
RTTN	chr18_70142397	-0.0939794	0.995786	7.39786e-09	1.02271e-06
ZNF236	chr18_76880037	-0.0600018	0.58084	7.60097e-14	7.2155e-11
ATP9B	chr18_79253287	-0.0793296	0.571699	3.79336e-06	0.000180695
ATP9B	chr18_79348249	-0.0170393	0.233529	0.00455209	0.0447465
TXNL4A	chr18_79977715	-0.0572174	1.19854	0.000118242	0.00288336
PTPRM	chr18_8384460	0.15997	-1.43402	0.00469539	0.0458162
NDUFV2	chr18_9124802	-0.117449	0.831966	0.000980879	0.0147632
VAPA	chr18_9954233	-0.0433087	1.32127	9.36661e-05	0.00237562
SLC44A2	chr19_10631006	0.0262049	0.868701	0.00284025	0.03229
C19orf38	chr19_10858227	-0.0348946	0.461233	2.22915e-06	0.000116135
RAB3D	chr19_11342757	-0.0863689	1.23285	0.00405975	0.0411934
AC008770.2	chr19_11951151	-0.22586	3.71574	0.00514047	0.0487495
ZNF433	chr19_12017799	-0.0445619	0.20201	0.000545526	0.00936699
ADGRE5	chr19_14388228	0.0520198	0.686947	0.00462703	0.0453824
GIPC1	chr19_14489892	0.0646002	0.240389	5.64761e-07	3.57413e-05
TPM4	chr19_16076004	0.037132	1.0541	0.000124285	0.00299229
ZNF253	chr19_19878459	0.106327	-0.830306	0.00174418	0.0227257
BTBD2	chr19_2037632	0.0445642	0.301231	0.00227858	0.027731
URI1	chr19_30005629	0.114036	-0.665239	5.60553e-05	0.00156507
DPY19L3	chr19_32438944	-0.0317775	0.290225	0.000209322	0.00442946
GPATCH1	chr19_33094314	0.0862278	-0.923469	0.00345415	0.0367834
WDR88	chr19_33129950	-0.0535898	0.258413	0.00454753	0.0447348
GARRE1	chr19_34333674	0.0383904	-0.446137	6.78779e-07	4.1958e-05
GARRE1	chr19_34341388	0.0581653	-0.314591	0.00203382	0.0254755
UBA2	chr19_34434825	0.109949	-0.035445	1.25585e-05	0.000463617
UBA2	chr19_34454427	0.147182	-0.517273	1.00351e-21	4.44557e-18
UBA2	chr19_34460452	0.0759183	0.122834	1.15437e-14	1.39469e-11
COX6B1	chr19_35654508	0.0515415	1.22199	9.20939e-07	5.43968e-05
ZNF573	chr19_37791851	-0.0353374	-0.140775	2.24813e-05	0.000741381
CATSPERG	chr19_38362867	-0.0305511	0.119235	0.00365858	0.0383761
C19orf54	chr19_40749405	-0.0264732	0.70422	0.0034178	0.0365426
CEACAM7	chr19_41687331	0.150091	-0.328179	0.00120342	0.017142
APOC1	chr19_44916409	1.42763	-12.7701	4.25912e-06	0.000197915
CLASRP	chr19_45068312	-0.130333	2.89349	0.000360375	0.00673612
FUT2	chr19_48704422	0.0194663	0.35061	0.00127829	0.0179963
UHRF1	chr19_4947051	-0.0874504	1.37698	9.41723e-05	0.0023839
ZNF480	chr19_52315815	0.0747284	-0.680833	0.000604633	0.010163
OSCAR	chr19_54099815	-0.0743166	0.609498	1.82653e-06	9.67115e-05
NDUFA3	chr19_54099815	0.0334206	0.636729	0.00408967	0.0413007
SSC5D	chr19_55489059	0.0768583	-1.05108	0.0018515	0.0237285
ZNF17	chr19_57417846	-0.0248475	0.483209	0.000170532	0.00380264
ADGRE1	chr19_6908665	-0.0472689	-0.0692311	0.0027354	0.0313122
TRAPPC5	chr19_7679190	-0.0725428	-0.095029	0.00464278	0.0454698
ZNF266	chr19_9417748	-0.0853408	1.47209	0.00114463	0.0165709
AC118553.2	chr1_100077147	-0.0976173	0.327562	0.00483802	0.0468298
MFSD14A	chr1_100077147	-0.0613311	0.262714	0.00062528	0.0104135
SASS6	chr1_100110558	-0.0638433	0.485968	0.00241144	0.0287943
DBT	chr1_100206311	-0.0356549	0.429406	0.00135524	0.018804
DBT	chr1_100218787	-0.0350088	0.359002	0.000255999	0.00517842
SLC30A7	chr1_100974788	-0.0534717	0.867362	0.00107918	0.0157812
KIF1B	chr1_10297149	-0.0222886	0.488841	0.000456082	0.0081251
VAV3	chr1_107617639	0.305127	-2.74779	2.31246e-07	1.74617e-05
INKA2	chr1_111695325	-0.166911	1.22705	1.30256e-09	2.43817e-07
INKA2	chr1_111697417	-0.045281	0.318793	9.8763e-06	0.00038267
INKA2	chr1_111759389	-0.107106	0.702595	0.000196095	0.00421017
INKA2	chr1_111760456	-0.07798	0.65228	3.75356e-10	9.23793e-08
ST7L	chr1_112616743	-0.0506396	0.682985	1.06734e-11	4.72832e-09
LRIG2	chr1_113093331	-0.0495798	0.298834	0.000154523	0.0035407
PTPN22	chr1_113829711	-0.0903683	0.68265	0.000667941	0.0110043
NRAS	chr1_114718230	0.04792	0.515084	0.00271176	0.031122
CSDE1	chr1_114737573	0.0623191	0.869937	0.00316409	0.0345686
TTF2	chr1_117062509	-0.0388231	0.601773	2.15726e-05	0.000720352
MTMR11	chr1_149929094	0.0865301	-0.387253	0.000311986	0.00601784
CA14	chr1_150263916	-0.0531711	0.14127	8.03687e-09	1.0899e-06
FHAD1	chr1_15328242	-0.0386574	0.218459	0.000619134	0.010337
UBAP2L	chr1_154254817	0.015723	0.795461	0.00485306	0.0469321
DNAJC16	chr1_15546896	-0.0242249	1.03815	0.000261471	0.00524125
DAP3	chr1_155709753	0.0454444	0.619133	0.00156088	0.0208693
DAP3	chr1_155716949	0.0300828	0.642512	9.31835e-05	0.00236789
DDI2	chr1_15638531	0.0152863	-0.0790522	0.0026797	0.0309143
TAGLN2	chr1_159927892	0.0633116	1.34385	5.65844e-05	0.00157324
COPA	chr1_160293497	0.0362588	0.730494	0.00032786	0.00624249
CD48	chr1_160711864	-0.0444682	0.328954	0.00428278	0.0428989
APOA2	chr1_161223056	-0.122686	-0.0918837	0.00481563	0.0467124
SDHC	chr1_161362302	0.0455434	0.713953	0.00180494	0.0233343
POU2F1	chr1_167416088	-0.0521729	1.49036	9.93377e-05	0.00249565
TIPRL	chr1_168196530	0.0389794	0.371431	0.00310544	0.0342501
FASLG	chr1_172659642	-0.12891	0.911096	3.59072e-05	0.00107479
CENPL	chr1_173828314	-0.0314205	0.166776	0.00172355	0.0225231
RC3H1	chr1_173961706	-0.128661	1.13148	0.000740892	0.0119464
RABGAP1L	chr1_174892724	-0.0493858	1.13708	0.00017168	0.00380887
COP1	chr1_176081295	0.0380579	0.273037	9.86512e-08	8.51347e-06
TOR3A	chr1_179085423	0.0333921	0.31784	0.00274594	0.0313799
DHX9	chr1_182856417	0.0538427	0.73965	0.00449281	0.0443937
SMG7	chr1_183512809	0.0242999	0.379041	6.10181e-07	3.82514e-05
PTGS2	chr1_186678192	-0.169054	1.83014	1.29995e-05	0.000475933
ASPM	chr1_197128344	-0.0275217	0.370427	0.00246762	0.0293596
KIF14	chr1_200581116	-0.017374	0.289904	0.000503796	0.0087408
KIF14	chr1_200589159	-0.0611309	0.452571	0.000760071	0.0121349
DTL	chr1_212044603	-0.0255991	0.711784	3.64192e-05	0.00108088
DTL	chr1_212068373	-0.0416474	0.994338	0.00438889	0.0436916
TATDN3	chr1_212796501	-0.0303126	0.334817	2.14176e-05	0.000716977
USP48	chr1_21690186	-0.022403	0.668157	1.54267e-05	0.000545968
USP48	chr1_21704399	-0.036206	0.702013	0.00349713	0.0371221
USP48	chr1_21706893	-0.0275322	0.667519	0.000411719	0.00748858
USP48	chr1_21756475	-0.0267992	0.888967	0.000108217	0.00268117
USP48	chr1_21757792	-0.0519652	0.889372	8.46162e-06	0.000338567
RAB3GAP2	chr1_220196404	0.0411667	-0.268407	5.18823e-05	0.00146394
DISP1	chr1_222983065	-0.0669808	0.371047	1.20312e-07	1.01843e-05
LBR	chr1_225412650	0.0472256	0.447301	3.76339e-08	3.84734e-06
SRP9	chr1_225783137	0.0847228	0.741639	0.0019978	0.0251905
TMEM63A	chr1_225872095	0.140256	-0.546458	9.77486e-05	0.00246038
CDC42BPA	chr1_227143115	0.429811	-3.64328	0.000473432	0.00834263
EPHB2	chr1_22913753	0.197748	-0.786959	0.000335701	0.00635536
TTC13	chr1_230958305	-0.0224966	0.594246	0.000893783	0.0136376
ARV1	chr1_230995821	0.211836	-1.2794	1.86959e-10	5.17644e-08
SIPA1L2	chr1_232428351	-0.0283947	0.703399	0.000826163	0.0129325
COA6	chr1_234383707	0.0713006	-0.216107	3.99466e-06	0.000188259
TARBP1	chr1_234465711	0.0405308	-0.279518	7.35993e-08	6.74576e-06
RBM34	chr1_235138182	-0.0496941	0.419883	0.000250577	0.00508422
RBM34	chr1_235152774	-0.0448825	-0.0754475	0.00166977	0.0219544
AL357556.3	chr1_235344152	-0.0211295	-0.26775	3.45453e-05	0.00104106
B3GALNT2	chr1_235470833	-0.0911993	0.746282	1.73275e-07	1.39565e-05
LYST	chr1_235775089	-0.0423476	0.189484	0.00283618	0.03229
ERO1B	chr1_236230100	-0.0792843	0.45395	0.000609986	0.0102228
LGALS8	chr1_236550993	-0.017566	0.479323	0.00135547	0.018804
EXO1	chr1_241871912	-0.0261974	0.55682	0.00172765	0.0225546
EYA3	chr1_28048326	-0.0367882	0.847189	0.00400177	0.0409016
GMEB1	chr1_28690194	-0.019192	0.522377	2.63738e-05	0.000846636
GMEB1	chr1_28714874	-0.0513398	0.981873	0.00507021	0.0482853
SNRNP40	chr1_31293159	-0.0572288	1.28488	0.00019386	0.00417569
ZBTB8OS	chr1_32621967	-0.0176562	0.565959	0.00410709	0.0414451
RNF19B	chr1_32936734	-0.0412014	1.67404	1.66386e-09	2.94836e-07
AGO3	chr1_35945667	-0.0434849	0.0192054	0.000255653	0.00517842
AGO3	chr1_36009426	-0.0692528	0.318242	4.81443e-10	1.10317e-07
UTP11	chr1_38018994	-0.029979	0.948561	0.00165781	0.0218791
DFFB	chr1_3872415	-0.0415221	0.633744	0.00328926	0.0355979
YBX1	chr1_42696512	0.0393411	1.43731	0.000238577	0.00487799
ARMH1	chr1_44689922	-0.0667788	0.154989	0.00488853	0.0471812
ARMH1	chr1_44704040	-0.0675248	0.333358	0.000763284	0.0121631
EIF2B3	chr1_44941510	0.162911	-1.06194	1.13512e-08	1.40988e-06
EPS15	chr1_51460954	-0.0412693	1.31872	0.00218189	0.0268991
ZFYVE9	chr1_52263754	-0.0241396	0.247669	0.00100074	0.014952
SSBP3	chr1_54404809	0.0292924	0.635918	0.00499483	0.0478252
ACOT11	chr1_54614941	-0.0166431	0.163605	0.00102005	0.0151595
NFIA	chr1_60865489	-0.0313404	0.541386	0.00248663	0.0295329
DOCK7	chr1_62578718	-0.0163507	0.170847	0.00233953	0.0282401
DOCK7	chr1_62578975	-0.017361	0.0702916	0.00186178	0.0238372
DOCK7	chr1_62619809	-0.0394542	0.452837	0.000106292	0.00264535
DOCK7	chr1_62625415	-0.0619889	0.467392	0.0014936	0.0201728
DOCK7	chr1_62663166	-0.0372059	0.305523	1.24959e-05	0.00046259
ITGB3BP	chr1_63446876	0.0124265	-0.0813662	1.65605e-06	8.83891e-05
SGIP1	chr1_66633167	-0.0884966	0.252262	4.34615e-05	0.0012639
SGIP1	chr1_66741261	-0.0638364	0.030379	0.000492292	0.00856569
MIER1	chr1_66959812	-0.0449026	0.823588	0.00270632	0.0310864
DEPDC1	chr1_68489670	-0.0896624	0.832293	0.003785	0.0392376
PTGER3	chr1_70862254	-0.113547	0.489445	6.47507e-05	0.00174198
ACADM	chr1_75733711	-0.173749	2.08057	1.94838e-05	0.000662944
TNFRSF9	chr1_7920926	-0.122564	0.748407	0.000932545	0.0141479
PARK7	chr1_7969441	0.0481049	1.13665	0.000865674	0.0133004
COL24A1	chr1_85889732	-0.0779624	0.244197	0.00200423	0.0252476
COL24A1	chr1_85970275	-0.0902292	0.403205	6.82667e-06	0.00028802
PKN2	chr1_88824272	-0.0457145	1.0023	0.00330867	0.0357497
LRRC8C	chr1_89715065	-0.09697	0.459171	0.00514436	0.0487495
GLMN	chr1_92297535	-0.0421259	0.566707	4.73749e-05	0.0013628
RPAP2	chr1_92297535	-0.0528628	0.386561	2.01824e-14	2.2352e-11
RPAP2	chr1_92300324	-0.0352389	0.12868	0.00264697	0.0307502
RPAP2	chr1_92380930	-0.0606211	0.618714	0.000376367	0.00696811
EVI5	chr1_92677229	-0.109863	0.998814	0.000870216	0.0133393
CCDC18	chr1_93226299	-0.0356207	0.502928	2.52716e-05	0.000815193
ARHGAP29	chr1_94177588	-0.0869026	0.55386	9.18002e-07	5.43968e-05
SLC25A33	chr1_9573330	-0.028536	0.438253	0.00393098	0.0403419
SNX7	chr1_98698691	0.0460696	0.428391	0.00352619	0.0373114
ESF1	chr20_13775083	0.0637002	-0.551107	0.000486311	0.0085037
HM13	chr20_31569101	0.065387	0.354817	4.11167e-05	0.00120894
TPX2	chr20_31766455	0.0260485	0.757834	0.00030824	0.0059716
NOL4L	chr20_32486641	0.149297	-0.944204	2.59428e-09	4.10452e-07
COMMD7	chr20_32706513	0.113978	-1.5122	4.16188e-08	4.19025e-06
CDK5RAP1	chr20_33367014	0.0760145	-0.446229	9.478e-07	5.54901e-05
CDK5RAP1	chr20_33387257	0.0544336	-0.209669	1.13745e-06	6.45117e-05
ITCH	chr20_34445261	0.0326519	0.0134808	4.82573e-07	3.17495e-05
ITCH	chr20_34466325	0.115537	-0.634662	0.00042583	0.0076997
PIGU	chr20_34637990	0.0690395	0.122228	0.000299469	0.00584426
NCOA6	chr20_34746931	0.0324775	-0.0562481	3.42332e-10	8.74921e-08
NCOA6	chr20_34750523	0.0875157	-0.470175	6.62382e-06	0.000281248
TRPC4AP	chr20_35077973	0.0816083	0.631416	8.0992e-06	0.000330653
CEP250	chr20_35511337	0.056257	-0.524591	0.00392722	0.0403345
CPNE1	chr20_35658804	-0.0321342	1.97655	0.000218884	0.00456667
RBM39	chr20_35707028	0.0246987	0.533489	0.0004119	0.00748858
RBM39	chr20_35716695	0.0827123	-0.0622946	1.23669e-10	3.73291e-08
RBM39	chr20_35724433	0.0558565	0.256342	0.00502036	0.0479659
RBM39	chr20_35736431	0.0649662	0.266544	0.000654718	0.0108359
PHF20	chr20_35842553	0.0741841	-0.375885	0.00014492	0.00336711
PHF20	chr20_35847325	0.0852402	-1.41349	1.42246e-13	1.18153e-10
PHF20	chr20_35871893	0.0550164	-0.188916	5.04528e-07	3.28685e-05
SOGA1	chr20_36817488	0.0607425	-0.799763	5.9515e-06	0.000257734
RBL1	chr20_37032576	0.0879066	-0.786487	2.12628e-05	0.000713591
RBL1	chr20_37044034	0.0222453	-0.271398	9.13456e-06	0.000359166
RBL1	chr20_37067133	0.0198828	-0.239475	0.00344437	0.0367381
RPN2	chr20_37241399	0.139084	0.55401	3.35217e-05	0.00101946
CTNNBL1	chr20_37802801	0.13556	-0.656243	1.03893e-12	6.57494e-10
RALGAPB	chr20_38497518	0.0579877	-0.668108	0.000453308	0.0081083
RALGAPB	chr20_38517489	0.0742269	-0.546552	9.99986e-11	3.09065e-08
RALGAPB	chr20_38554170	0.0473888	-0.0751231	0.00288091	0.0326126
RALGAPB	chr20_38562749	0.0496052	-0.0970011	0.000167863	0.00376206
PTPRT	chr20_42677849	0.241342	-4.45899	0.000494554	0.00859167
STK4	chr20_44994993	0.0517584	-0.673324	0.00357076	0.0376332
WFDC3	chr20_45787715	0.189792	-2.27978	7.4749e-12	3.42557e-09
DNTTIP1	chr20_45787715	0.120008	-0.00549305	1.33001e-06	7.36493e-05
WFDC3	chr20_45796388	-0.108426	1.44379	0.00391875	0.0402948
DNTTIP1	chr20_45800995	0.0726804	0.460155	0.000517041	0.00894724
SNX21	chr20_45842010	0.0574648	-0.567068	2.2337e-06	0.000116135
ACOT8	chr20_45842010	0.0969758	-0.73765	2.41335e-12	1.27881e-09
EYA2	chr20_47169102	0.151152	-1.75119	0.00219936	0.0270644
NCOA3	chr20_47623794	0.086725	-0.711403	5.67804e-09	8.20229e-07
NCOA3	chr20_47637800	0.0543663	-0.309185	1.64312e-05	0.000576176
NCOA3	chr20_47652318	0.105715	-1.21418	1.30417e-05	0.000476165
ARFGEF2	chr20_48998538	0.0811687	-0.302572	0.000209641	0.00442946
ARFGEF2	chr20_49032974	0.0828815	-0.333908	6.89835e-13	4.82522e-10
CSE1L	chr20_49077146	0.0297473	0.539847	0.000386743	0.00711886
CSE1L	chr20_49092173	0.0799655	0.666907	0.000400443	0.00733043
STAU1	chr20_49118425	0.0755937	0.749697	0.000484773	0.00848832
STAU1	chr20_49153907	0.0418138	0.832556	2.00036e-08	2.31172e-06
STAU1	chr20_49159149	0.046743	0.919525	0.000490825	0.00856046
SLC9A8	chr20_49878071	0.088934	-1.13253	2.07303e-07	1.59892e-05
RNF114	chr20_49946261	0.0482838	0.613823	1.94745e-09	3.27615e-07
DPM1	chr20_50935244	0.0340369	0.89262	0.00355358	0.0374909
NFATC2	chr20_51398571	0.097687	-1.18749	0.000242633	0.00493812
ATP9A	chr20_51669946	0.108501	-0.117704	0.000236645	0.00484594
ATP9A	chr20_51676218	0.205186	-2.64956	1.05574e-09	2.09114e-07
ZNF217	chr20_53571861	0.0511055	0.138054	0.00514639	0.0487495
RAE1	chr20_57367113	0.114567	-1.0085	3.55116e-05	0.00106535
NELFCD	chr20_58994563	0.0802607	-0.985618	1.77195e-07	1.41862e-05
ATP5F1E	chr20_59028741	0.130444	0.0724451	3.51661e-12	1.66913e-09
ATP5F1E	chr20_59036774	0.146322	-0.171011	6.79976e-08	6.3195e-06
PRELID3B	chr20_59036774	0.129547	0.0575503	5.25987e-07	3.37699e-05
PRELID3B	chr20_59038650	0.093329	-0.0791501	7.32716e-11	2.31852e-08
SYCP2	chr20_59864168	-0.16792	0.90773	0.00114813	0.0165855
SYCP2	chr20_59881510	-0.0904233	0.143229	0.000175355	0.0038712
LSM14B	chr20_62134475	0.0584931	0.204656	3.00971e-05	0.000930211
RPS21	chr20_62388291	0.126442	0.94403	5.50599e-07	3.50118e-05
PRPF6	chr20_64016940	0.113003	0.10453	4.80588e-11	1.68079e-08
PLCB4	chr20_9380187	0.222516	-3.28852	3.42239e-08	3.58138e-06
PLCB4	chr20_9473255	0.152054	-1.91827	1.77903e-09	3.11097e-07
SAMSN1	chr21_14583529	-0.284424	2.37847	0.000360893	0.00673632
SAMSN1	chr21_14615864	-0.0282889	0.344609	5.09981e-11	1.73786e-08
CHODL	chr21_18256493	0.165148	-2.87267	0.00100427	0.0149796
LTN1	chr21_28947613	0.0654856	-0.864044	0.000825016	0.0129298
LTN1	chr21_28961416	0.133804	-1.42778	0.000682042	0.011163
LTN1	chr21_28966884	0.075693	-0.751994	4.7051e-10	1.09703e-07
CCT8	chr21_29063326	0.0561686	0.971411	0.000180772	0.00395793
TIAM1	chr21_31225657	-0.0740917	0.640521	0.000210702	0.00444481
HUNK	chr21_31940228	0.149125	-1.79825	1.70333e-07	1.38032e-05
CFAP298-TCP10L	chr21_32601785	-0.085749	-0.0546101	2.83078e-05	0.000888014
CFAP298-TCP10L	chr21_32607595	-0.0679977	-0.103901	2.19557e-08	2.43159e-06
CFAP298	chr21_32607595	-0.019238	0.211967	0.00084166	0.0131287
CFAP298-TCP10L	chr21_32609763	-0.0870061	-0.18707	4.55057e-05	0.00131546
IL10RB	chr21_33283030	-0.0468186	-0.159281	0.00107886	0.0157812
GART	chr21_33535331	0.0231727	0.443271	0.00183297	0.0236048
SON	chr21_33575583	0.0975609	-0.0954826	0.000620427	0.0103456
DONSON	chr21_33575583	-0.137511	1.40473	7.53965e-07	4.59642e-05
ITSN1	chr21_33813824	-0.0315395	0.272656	0.000957828	0.014449
ITSN1	chr21_33886211	-0.0213412	0.32854	0.00293147	0.0329047
CHAF1B	chr21_36387821	-0.0691779	1.04551	1.29582e-06	7.20561e-05
TTC3	chr21_37150045	0.0642653	-0.884613	0.000162881	0.00367559
TTC3	chr21_37182948	0.178528	-1.0361	0.00163267	0.0216333
ETS2	chr21_38810013	0.117528	-0.378775	0.000122171	0.00296286
ETS2	chr21_38810126	0.238456	-0.820852	4.1987e-07	2.84373e-05
UMODL1	chr21_42129699	0.266075	-3.66593	0.000677647	0.0111184
PKNOX1	chr21_43004238	-0.0471866	0.653944	4.83658e-06	0.000217156
YBEY	chr21_46283542	-0.101698	1.26654	0.00454013	0.0446951
MED15	chr22_20564610	0.0441572	0.0408726	0.00267749	0.0309143
NF2	chr22_29655717	-0.0356035	0.783685	5.48877e-06	0.000241542
MTMR3	chr22_29978884	-0.034646	0.0118773	0.00240882	0.0287889
CCDC157	chr22_30376240	-0.0251422	-0.18573	0.00107939	0.0157812
RNF215	chr22_30376240	-0.0234324	0.0774804	6.03589e-05	0.00164592
PRR14L	chr22_31688028	-0.0374712	0.767629	9.17412e-05	0.00234019
DEPDC5	chr22_31815386	-0.021331	0.13298	4.58313e-07	3.04549e-05
SLC5A1	chr22_32086141	0.0731805	0.0286121	0.00121023	0.0172206
APOL1	chr22_36254863	-0.120031	2.36821	0.00176421	0.0229416
TNRC6B	chr22_40312456	-0.123534	0.995297	4.098e-09	6.11937e-07
PARVG	chr22_44193757	-0.0626975	0.237835	0.000298595	0.00583577
TTC38	chr22_46283954	0.0691012	0.413191	0.00207511	0.0259193
TRMU	chr22_46343392	-0.0404769	0.519665	0.000227676	0.00469848
RPL31	chr2_101010882	0.0483752	1.16664	0.000188843	0.00410012
TBC1D8	chr2_101010882	-0.0496947	0.837904	0.000219405	0.00457037
RPL31	chr2_101023626	0.130914	0.693174	4.07798e-07	2.80649e-05
TBC1D8	chr2_101023626	-0.106367	1.0875	0.000127607	0.00303924
IL18R1	chr2_102341169	-0.0403546	0.282924	5.31048e-06	0.000234472
CCDC138	chr2_108846677	-0.0888398	0.576976	0.000122895	0.002975
BUB1	chr2_110639661	-0.0509611	0.994116	0.00498336	0.0477841
BUB1	chr2_110649392	-0.0460293	0.998253	1.18289e-05	0.000445345
SLC66A3	chr2_11177720	0.0739502	-0.448407	0.00407284	0.0411934
ROCK2	chr2_11192113	0.0574945	0.174652	0.00201895	0.0253849
TMEM87B	chr2_112096987	0.0473429	0.317738	0.000940168	0.0142428
ROCK2	chr2_11211593	0.160003	-0.666901	0.00338797	0.0363224
ROCK2	chr2_11211909	0.0491972	0.0945977	0.000928635	0.0141046
SLC35F5	chr2_113742700	0.0711158	-0.278349	8.12557e-06	0.000330653
DDX18	chr2_117821116	0.185273	-0.643879	0.00183594	0.0236201
TMEM177	chr2_119682127	0.0181003	0.14558	0.000558429	0.00955151
TSN	chr2_121763138	0.0175025	0.718439	9.39155e-07	5.52273e-05
TRIB2	chr2_12718273	-0.203929	2.90658	0.000330877	0.00629092
TMEM163	chr2_134456848	-0.0973957	0.290981	0.00442493	0.0439903
LRP1B	chr2_140868266	0.150989	-5.71289	0.00105133	0.0154967
KYNU	chr2_142918568	-0.0597082	0.593096	3.39155e-06	0.000166389
ARHGAP15	chr2_143155713	-0.0564809	0.107853	2.75947e-05	0.000877352
PRPF40A	chr2_152671387	0.0990187	-0.108464	0.000372483	0.00692349
PRPF40A	chr2_152714446	0.0307399	0.480629	0.00406005	0.0411934
NBAS	chr2_15551341	-0.0208238	0.602037	2.44832e-05	0.000793614
GALNT5	chr2_157295535	-0.116118	1.70864	0.00142442	0.0195362
CYTIP	chr2_157418600	-0.0326108	0.579484	6.08907e-05	0.00165488
TANC1	chr2_159170503	-0.0215171	0.475605	0.00235132	0.0283206
PLA2R1	chr2_159987058	0.0911648	-1.09951	0.00312802	0.0344419
DPP4	chr2_162020532	-0.196465	2.05625	2.40904e-05	0.00078279
DPP4	chr2_162033687	-0.078525	0.829724	0.00113489	0.0164829
SLC38A11	chr2_164952629	0.122459	-2.20263	0.000146525	0.00339373
SCN9A	chr2_166281811	-0.0671009	-0.219069	0.00477566	0.0464971
BBS5	chr2_169499458	0.109723	-2.4287	0.0040675	0.0411934
KLHL23	chr2_169767308	0.0931991	-0.609605	2.66888e-05	0.000854683
METTL8	chr2_171330752	-0.0246132	0.239088	0.00334064	0.0359783
DYNC1I2	chr2_171712625	0.0527826	0.282532	0.000104318	0.00260599
DYNC1I2	chr2_171725577	0.0386113	-0.631154	7.64596e-08	6.95992e-06
PDK1	chr2_172570842	-0.0740235	1.52875	9.25086e-09	1.21727e-06
PDK1	chr2_172586159	-0.0571104	0.89925	0.000469409	0.00828479
MAP3K20	chr2_173239310	0.0731412	-0.518281	1.17037e-05	0.000441883
MAP3K20	chr2_173258645	0.108038	-0.564466	0.00417988	0.0420837
MAP3K20	chr2_173266784	0.0230625	-0.0333295	0.00155562	0.02082
CDCA7	chr2_173367297	0.27119	-1.06062	2.70044e-09	4.1276e-07
SCRN3	chr2_174399900	0.018186	-0.00670423	0.00073707	0.0119141
HOXD8	chr2_176130955	-0.0975359	0.680158	0.000828143	0.0129348
PLEKHA3	chr2_178499183	-0.033505	0.291693	0.000179174	0.00392941
TTN	chr2_178804518	-0.0491819	-0.487809	0.00151427	0.0203898
NUP35	chr2_183157617	-0.102806	1.14298	0.00227366	0.0276966
GLS	chr2_190910358	0.0502066	0.0129288	0.00501896	0.0479659
STAT4	chr2_191146760	-0.0808539	0.307767	9.71084e-10	2.00095e-07
DNAH7	chr2_195897768	-0.0516121	-0.150089	1.54876e-05	0.000545968
CCDC150	chr2_196666795	-0.0855653	0.292606	0.00342473	0.0365874
SF3B1	chr2_197402516	0.0373666	0.561034	0.00162947	0.0216124
WDR35	chr2_19941850	0.129938	-1.32737	1.27423e-05	0.000469101
WDR35	chr2_19974409	0.0467127	-1.25155	3.89604e-05	0.00115063
TYW5	chr2_199933368	-0.0801121	0.464188	0.000602667	0.0101514
ORC2	chr2_200913995	0.0146519	0.138158	0.000108538	0.00268117
CASP8	chr2_201275017	-0.0238155	0.664821	0.00179718	0.0232565
TRAK2	chr2_201381222	0.0601585	-0.527962	0.000869042	0.0133367
ALS2	chr2_201729207	-0.0658971	0.717633	2.31421e-09	3.70553e-07
ALS2	chr2_201765831	-0.113715	1.02497	4.88968e-06	0.000218067
BMPR2	chr2_202520054	0.0397489	-0.0673558	4.38875e-08	4.38545e-06
BMPR2	chr2_202552669	0.0799088	-0.524559	6.21763e-09	8.8852e-07
ICA1L	chr2_202811660	-0.0296298	-0.0681137	8.13968e-06	0.000330653
ICA1L	chr2_202811797	-0.134097	1.38045	0.00408262	0.0412609
NBEAL1	chr2_203099734	-0.0577977	0.246926	0.000587086	0.00991085
NBEAL1	chr2_203137991	-0.102286	1.06752	0.000288365	0.00572852
RHOB	chr2_20449173	0.068134	0.896387	1.53495e-06	8.32633e-05
APOB	chr2_21024879	0.931614	-10.4914	0.00124837	0.017631
CPS1	chr2_210656504	-0.14441	1.40874	6.27526e-05	0.00169854
CPS1	chr2_210663104	-0.26564	2.48058	0.000983076	0.0147795
IKZF2	chr2_213008113	-0.0268999	-0.140445	0.000376323	0.00696811
BARD1	chr2_214792459	-0.0297512	0.407299	0.00175463	0.0228394
ARPC2	chr2_218238591	0.0174796	1.10751	5.13176e-07	3.32524e-05
USP37	chr2_218476995	-0.060227	0.387819	9.78646e-10	2.00095e-07
USP37	chr2_218485636	-0.0126634	-0.0167144	5.45559e-05	0.00152642
DOCK10	chr2_224841907	-0.0834395	0.364128	2.17179e-05	0.000723385
DOCK10	chr2_224864508	-0.0501427	0.176547	0.000228567	0.00470954
TRIP12	chr2_229840801	0.0405652	-0.0142729	8.24624e-05	0.00214048
SP100	chr2_230498538	-0.0835909	1.20604	3.52311e-08	3.65798e-06
PSMD1	chr2_231075582	-0.037634	0.932831	0.00513531	0.0487488
UGT1A8	chr2_233617578	0.228214	-3.7907	0.0022922	0.0278627
UGT1A8	chr2_233636394	0.201195	-3.5708	0.00364026	0.0382444
UBE2F	chr2_237987853	-0.0115603	0.331662	0.00372214	0.0389197
UBE2F	chr2_237990404	-0.0332872	0.583697	0.000386231	0.00711886
SCLY	chr2_238082917	-0.0709229	0.648429	0.00133122	0.0185674
TRAF3IP1	chr2_238332805	0.0284884	-0.0063627	0.00268426	0.03094
SH3YL1	chr2_242725	-0.145083	2.02812	3.3755e-05	0.00102421
SH3YL1	chr2_243568	-0.0673878	1.25467	0.00513479	0.0487488
ACP1	chr2_271999	0.0192341	0.862956	0.00204746	0.0256222
SNX17	chr2_27374324	0.0379325	0.743309	0.000163175	0.00367559
BABAM2	chr2_28241503	0.0412537	0.0901613	0.00237897	0.0285091
DPY30	chr2_31869955	0.0389121	0.27431	4.24689e-05	0.00124046
DPY30	chr2_31892149	0.0274029	0.493106	0.00460312	0.0451813
BIRC6	chr2_32500160	0.0719652	-0.251789	0.00116476	0.0167167
BIRC6	chr2_32508277	0.0130081	0.18274	0.000302465	0.00589408
TTC27	chr2_32758233	0.031379	0.130483	0.000406461	0.00743035
LTBP1	chr2_33361398	0.0592715	-0.256539	0.000108395	0.00268117
THUMPD2	chr2_39737067	-0.0271242	0.323035	0.00503549	0.0480414
LRPPRC	chr2_43934716	0.0490897	0.621897	0.00054172	0.00932572
SRBD1	chr2_45579825	-0.0509313	1.3085	0.000161087	0.00365332
EPCAM	chr2_47373743	0.103387	1.26447	7.59248e-06	0.000313367
ASB3	chr2_53670759	-0.0531331	0.339432	0.0043868	0.0436916
ASB3	chr2_53809198	-0.0734814	0.87616	0.000111219	0.00273217
EML6	chr2_54843965	-0.024699	-0.481961	0.00199642	0.0251905
RPS27A	chr2_55234234	0.122605	0.741613	1.31696e-08	1.60573e-06
CCDC88A	chr2_55332516	-0.0545667	0.203645	6.183e-08	5.81259e-06
PAPOLG	chr2_60793918	-0.151348	1.26147	0.00145131	0.0197825
KIAA1841	chr2_61073422	0.0425533	-0.566777	0.00261609	0.0305786
KIAA1841	chr2_61081435	0.0285954	-0.530123	0.000171072	0.00380828
KIAA1841	chr2_61092594	0.0362288	-0.534101	0.00314243	0.0344578
USP34	chr2_61347875	0.273229	-3.26917	1.65815e-09	2.94836e-07
FAM161A	chr2_61835959	-0.0540087	0.441478	7.12547e-06	0.000297791
VPS54	chr2_63983846	0.0644574	-0.137872	7.99821e-06	0.000328075
AFTPH	chr2_64579411	0.0482597	0.220477	1.52005e-07	1.23936e-05
RAB1A	chr2_65129928	-0.0845826	1.90451	0.00465045	0.0455114
PNO1	chr2_68162145	0.0421539	0.220742	4.0376e-07	2.79478e-05
ASPRV1	chr2_69962200	-0.0521746	0.260921	1.95541e-05	0.000662944
CCT7	chr2_73244066	0.0366081	1.13045	2.07954e-09	3.37037e-07
WDR54	chr2_74422795	-0.0598536	1.02647	8.54635e-08	7.57207e-06
MRPL19	chr2_75655031	-0.0105457	0.521899	0.000324658	0.0061987
GCFC2	chr2_75655031	-0.0105365	0.182436	0.00224723	0.0274249
MRPL19	chr2_75673575	-0.029662	0.593688	0.000353667	0.00665755
REG1A	chr2_79121004	-0.424041	5.96312	0.00165153	0.021818
DNAH6	chr2_84528873	-0.0518679	-0.00357223	4.61357e-05	0.00133003
DNAH6	chr2_84616868	-0.118991	0.407189	0.0049318	0.0475298
VAMP5	chr2_85579959	-0.0767268	1.92296	0.00307787	0.0340307
IMMT	chr2_86158561	0.0459174	0.820521	0.000307359	0.00596375
IMMT	chr2_86166648	0.0531226	0.662004	3.06727e-05	0.000945801
RMND5A	chr2_86771529	0.0416284	-0.228049	0.00171657	0.0224717
FABP1	chr2_88122982	0.358147	-1.22206	0.00102204	0.0151595
MRPS5	chr2_95100809	-0.0353479	0.931374	0.00025726	0.00518028
MRPS5	chr2_95117957	-0.0422184	0.977514	0.000995265	0.014929
MRPS5	chr2_95150273	-0.0224802	0.940958	0.000986717	0.0148175
ITPRIPL1	chr2_96328313	-0.109115	0.586507	6.40399e-06	0.000272786
UNC50	chr2_98618120	0.0320564	0.229078	0.00036771	0.00684435
AC079447.1	chr2_99150465	-0.0614337	0.0528749	7.45468e-06	0.000308638
C2orf15	chr2_99150465	0.029154	-0.422635	0.00274604	0.0313799
AC079447.1	chr2_99171685	-0.150955	0.709923	1.41189e-05	0.000509891
TXNDC9	chr2_99319647	0.129176	-0.644594	1.97283e-05	0.000667149
AC079447.1	chr2_99319803	-0.112336	0.729419	5.88924e-08	5.6308e-06
TXNDC9	chr2_99319803	0.0698768	-0.367413	1.7894e-17	5.94527e-14
EIF5B	chr2_99378996	0.0464137	0.148416	0.00260798	0.0305106
EIF5B	chr2_99390428	0.0262119	0.58932	0.00285158	0.0323633
FANCD2	chr3_10034325	-0.0299619	0.748234	0.00229359	0.0278627
FANCD2	chr3_10087282	-0.0222518	0.446214	8.91753e-07	5.36263e-05
FANCD2OS	chr3_10087282	-0.126899	0.0422947	0.00177137	0.0230122
BRK1	chr3_10126203	0.0886884	0.997262	0.00390774	0.0402588
NXPE3	chr3_101821306	-0.0387347	0.0278033	0.00079249	0.0125234
HHLA2	chr3_108362329	0.150325	-0.952756	5.42631e-05	0.00152218
GTPBP8	chr3_113000945	-0.0358022	0.447761	6.06792e-06	0.00026098
AC112128.1	chr3_113409007	-0.0259553	-0.34185	0.00118108	0.0169144
SPICE1	chr3_113448002	-0.0424727	-0.13701	0.00253726	0.0298938
SPICE1	chr3_113503253	-0.0412212	-0.039671	0.000127097	0.00303252
POLQ	chr3_121476457	0.0178221	-0.461972	0.00364779	0.0382932
POLQ	chr3_121483587	-0.0300412	0.521846	1.04988e-05	0.000400946
IQCB1	chr3_121807306	-0.071382	1.16404	2.24959e-07	1.7084e-05
ILDR1	chr3_122001668	0.0529851	-0.451812	7.90053e-05	0.00205879
PARP9	chr3_122540892	-0.0407913	1.09729	0.000147547	0.00341027
MUC13	chr3_124920328	0.268187	-0.408751	0.00495555	0.0477241
MKRN2OS	chr3_12529922	-0.072115	0.585232	5.8901e-10	1.32677e-07
MKRN2OS	chr3_12532642	-0.128134	0.866645	6.80441e-05	0.00180641
MRPL3	chr3_131468046	0.0519126	-0.00559262	0.000715318	0.0115934
DNAJC13	chr3_132450862	0.0172682	0.0897119	0.00197546	0.0249799
UBA5	chr3_132672008	-0.0538426	1.17091	0.000240787	0.00490806
CEP70	chr3_138529168	-0.033899	0.576581	0.000548827	0.0094053
XRN1	chr3_142417017	-0.0277671	0.603613	0.000383607	0.00708811
U2SURP	chr3_143055207	0.0351784	0.115993	0.00510141	0.0484962
EIF2A	chr3_150564276	0.0725564	0.156226	1.19376e-05	0.000447869
MED12L	chr3_151384999	0.492497	-6.38561	0.00520786	0.0491915
GOLIM4	chr3_168046807	0.0586628	0.862092	0.00407239	0.0411934
TBC1D5	chr3_17258594	0.0806535	-0.427619	1.49179e-06	8.12539e-05
NAALADL2	chr3_175471619	0.206118	-2.12244	3.27751e-05	0.000999039
ACTL6A	chr3_179573508	0.0470976	-0.379467	0.00178086	0.0230904
ACTL6A	chr3_179580797	0.0495375	0.34718	2.47267e-05	0.000799556
ACTL6A	chr3_179586468	0.038442	0.180419	3.96445e-06	0.0001875
USP13	chr3_179730279	-0.12285	1.02767	0.00431997	0.0431459
USP13	chr3_179763951	-0.0426462	0.521628	8.53677e-13	5.67269e-10
ABCC5	chr3_183947465	0.11865	-1.50237	3.9775e-08	4.03519e-06
ABCC5	chr3_183959848	0.1046	-1.00756	1.99259e-07	1.54862e-05
MAP3K13	chr3_185437643	-0.0248121	0.340874	0.00345829	0.0367979
IL1RAP	chr3_190620251	-0.0460554	0.645865	0.00289454	0.0326661
OPA1	chr3_193648639	0.0931315	-0.274584	0.00467038	0.0456392
ATP13A3	chr3_194448083	0.0674436	-0.17601	0.00013553	0.00320498
DLG1	chr3_197065486	0.0578501	-0.344982	8.32224e-05	0.002156
TGFBR2	chr3_30650380	0.134167	-0.210187	2.15405e-12	1.24466e-09
PDCD6IP	chr3_33835946	0.141597	-0.24645	4.81262e-05	0.00137796
ITGA9	chr3_37505940	0.212417	-1.85043	7.21041e-05	0.00189321
ITGA9	chr3_37508537	0.0844232	-0.945393	2.9593e-05	0.000916761
EIF1B	chr3_40310865	0.0396306	0.414357	8.28e-06	0.000332451
ULK4	chr3_41681657	-0.0526533	0.418308	0.000996601	0.0149322
ULK4	chr3_41715354	-0.0882992	0.565074	2.05641e-08	2.33588e-06
ANO10	chr3_43565733	0.0441582	-0.169469	6.21059e-08	5.81259e-06
CSPG5	chr3_47562781	-0.0959655	0.265225	0.00473158	0.0461355
SMARCC1	chr3_47735875	0.0363428	0.337988	0.000322246	0.00617987
SMARCC1	chr3_47738113	0.1643	-1.30478	4.22117e-05	0.00123567
ATRIP	chr3_48449938	-0.0234415	0.509079	0.000856358	0.0132491
RBM6	chr3_50061561	0.0138923	0.319583	0.00234202	0.0282445
RBM6	chr3_50075157	0.0568809	-0.0978809	0.000278798	0.00555617
HYAL1	chr3_50301951	-0.208694	2.5901	0.000259808	0.00522368
EDEM1	chr3_5208278	-0.0637411	1.30406	2.44979e-08	2.64073e-06
GNL3	chr3_52691703	0.0274145	0.787792	0.00251817	0.0297653
GNL3	chr3_52693174	0.0667549	0.643737	0.00268662	0.0309403
ASB14	chr3_57276768	-0.230312	1.33268	0.000891093	0.0136126
RPP14	chr3_58310483	-0.0546901	0.327984	3.84343e-07	2.68838e-05
CADPS	chr3_62445713	0.0592544	-1.41341	2.08137e-07	1.59892e-05
ADAMTS9	chr3_64604348	-0.0887351	1.02513	0.00208706	0.0260197
SLC25A26	chr3_66346344	0.0607626	-0.404811	0.00285576	0.0323832
FRMD4B	chr3_69193620	-0.0702634	0.615605	0.00447666	0.0443074
FOXP1	chr3_70959191	-0.0428826	0.352644	9.44868e-08	8.31609e-06
FOXP1	chr3_71198435	-0.167002	1.28387	0.00315122	0.0345258
EIF4E3	chr3_71690182	-0.0889131	0.831891	6.73249e-09	9.4184e-07
CNTN3	chr3_74521223	0.0977392	-2.25661	0.00191465	0.0243499
IL17RC	chr3_9921084	-0.0792364	0.758743	0.0037426	0.0390417
WDR1	chr4_10097919	0.0330549	0.767527	0.000297238	0.00581781
NFKB1	chr4_102584628	-0.0351031	1.15578	0.00232675	0.028137
MANBA	chr4_102671435	-0.0670917	0.75146	4.28142e-06	0.000198258
CENPE	chr4_103163609	-0.0412638	0.480305	0.00162213	0.0215581
TET2	chr4_105272497	0.108124	-1.08657	0.00152315	0.0204885
INTS12	chr4_105897887	-0.0850574	0.824019	0.0029314	0.0329047
MCUB	chr4_109664423	-0.0421708	1.05355	0.00143294	0.0196126
ALPK1	chr4_112435134	-0.0799047	0.558991	0.00297222	0.0331303
ZGRF1	chr4_112585730	-0.0383998	0.097538	2.19283e-05	0.000728567
UGT8	chr4_114665817	-0.048806	1.5714	1.02133e-05	0.000392296
METTL14	chr4_118688028	-0.012532	0.211706	0.00528057	0.0497369
SEC24D	chr4_118744174	-0.167168	4.06023	0.0019798	0.025011
SEC24D	chr4_118745063	-0.0708456	1.39916	6.5404e-11	2.12005e-08
SEC24D	chr4_118752897	-0.0403198	0.820911	0.00309089	0.0341463
PDE5A	chr4_119505944	-0.158581	1.36082	0.00074209	0.0119464
TNIP3	chr4_121161222	-0.123743	0.652702	1.62446e-06	8.70525e-05
BBS7	chr4_121844016	-0.100659	0.880274	0.00119508	0.017053
INTU	chr4_127699990	-0.0435011	0.0350171	0.00114725	0.0165855
HSPA4L	chr4_127803563	-0.148023	2.02564	1.54268e-05	0.000545968
HSPA4L	chr4_127830621	-0.120561	0.979242	0.000216774	0.00453689
PLK4	chr4_127893271	-0.0512124	0.644154	1.39142e-07	1.14857e-05
PLK4	chr4_127896751	-0.0635501	0.850731	3.33905e-11	1.23267e-08
ABHD18	chr4_128011811	-0.0426066	0.362102	0.00110465	0.0161112
LARP1B	chr4_128075012	-0.0505268	0.612986	5.32773e-05	0.00150012
SCLT1	chr4_128942895	-0.0478146	0.157569	0.000323246	0.00618533
SLC7A11	chr4_138232385	-0.162135	1.36138	0.000778957	0.0123389
NOCT	chr4_139045510	-0.0222892	0.422789	0.00412026	0.0415465
INPP4B	chr4_142208828	-0.0779882	0.715001	0.00132449	0.0185094
OTUD4	chr4_145112217	-0.0208712	0.494588	0.000223796	0.00463278
OTUD4	chr4_145124972	-0.0387789	0.613724	0.000159996	0.00363479
PRMT9	chr4_147683721	-0.0240537	0.6135	1.06923e-08	1.36441e-06
ARHGAP10	chr4_147857535	-0.070439	0.643893	0.00221855	0.0271953
ARHGAP10	chr4_147906547	-0.12422	0.996654	0.000356766	0.00667806
FAM160A1	chr4_151638566	-0.0388833	0.33791	2.63871e-11	1.03865e-08
FAM160A1	chr4_151662756	-0.0324503	0.399531	3.7384e-10	9.23793e-08
C4orf46	chr4_158669771	-0.0422767	0.561448	0.000218025	0.00455591
TAPT1	chr4_16188358	-0.039441	0.423145	3.39986e-05	0.00102925
TAPT1	chr4_16202601	-0.0382286	0.494673	0.000305161	0.00593791
KLHL2	chr4_165294511	-0.0369188	0.590112	0.00326612	0.0354341
KLHL2	chr4_165310847	-0.0484816	1.2381	0.00016519	0.00371467
CPE	chr4_165467674	0.137433	-1.13244	0.00407018	0.0411934
ANXA10	chr4_168139654	-0.597114	4.3765	0.00457636	0.0449519
DDX60	chr4_168268975	-0.120344	2.09782	5.96028e-05	0.00163514
SH3RF1	chr4_169156309	-0.0510334	1.02106	0.00406594	0.0411934
NEK1	chr4_169507184	-0.018324	0.0615159	0.00119589	0.017053
NEIL3	chr4_177353766	-0.0271405	0.261671	1.09534e-07	9.33146e-06
AGA	chr4_177436361	0.0421117	-0.12981	0.00496985	0.047758
NCAPG	chr4_17840247	-0.0493582	0.684071	0.00101087	0.015061
LCORL	chr4_17962906	-0.0794174	0.418084	9.23829e-09	1.21727e-06
TENM3	chr4_182728874	-0.0914342	0.332046	0.00146488	0.0199266
RWDD4	chr4_183646279	-0.0482767	0.697	0.00444553	0.0441233
PRIMPOL	chr4_184678526	-0.0281274	0.468977	3.12592e-06	0.000154444
CENPU	chr4_184731060	-0.15409	1.68909	5.52904e-11	1.83702e-08
KLKB1	chr4_186228047	-0.554428	4.23535	0.00381456	0.0395133
KLKB1	chr4_186251180	0.674529	-2.69389	0.00214049	0.0265365
PACRGL	chr4_20704445	-0.0354813	0.21936	0.00116116	0.0167011
SEPSECS	chr4_25159111	-0.0245409	0.33976	0.00158367	0.0211316
TBC1D19	chr4_26735442	-0.0526094	0.303192	3.67185e-08	3.78285e-06
STIM2	chr4_27003116	-0.116847	1.26281	4.09675e-07	2.80649e-05
GRK4	chr4_3013743	-0.0769047	0.255605	0.000445097	0.00797216
RGS12	chr4_3428672	-0.116241	0.916703	0.000162985	0.00367559
ZNF141	chr4_343725	0.0275994	-1.03328	7.16695e-06	0.000298011
ARAP2	chr4_36082300	-0.0749802	0.450281	0.000788039	0.0124679
ARAP2	chr4_36124977	-0.0994926	0.675745	2.23706e-06	0.000116135
ARAP2	chr4_36160652	-0.0380239	0.239728	0.000862028	0.0132828
TBC1D1	chr4_38132803	-0.0289705	0.789315	6.80973e-05	0.00180641
FAM114A1	chr4_38935696	-0.132583	2.96593	9.73893e-08	8.4595e-06
FAM114A1	chr4_38941077	-0.0505809	1.22499	9.61495e-08	8.40676e-06
WDR19	chr4_39214774	-0.0290196	0.25873	5.98601e-05	0.00163691
WDR19	chr4_39224867	-0.0282526	0.179688	0.000323462	0.00618533
WDR19	chr4_39232100	-0.0325439	0.21851	4.95667e-05	0.00140664
LIAS	chr4_39477229	-0.0621701	0.439342	2.71833e-05	0.000866346
UGDH	chr4_39500103	-0.0383253	1.48149	4.85344e-05	0.00138417
PDS5A	chr4_39849439	-0.0103918	0.78151	0.00359571	0.0378661
PDS5A	chr4_39926867	-0.0288353	0.873782	0.000795982	0.0125487
LIMCH1	chr4_41613194	-0.111654	0.978605	0.000152637	0.00351569
ATP8A1	chr4_42624643	-0.096909	1.28754	9.1472e-05	0.00233781
NFXL1	chr4_47854941	-0.0311657	0.488971	3.08484e-07	2.21608e-05
NFXL1	chr4_47899139	-0.0317517	0.794561	4.12812e-06	0.000192501
SGCB	chr4_52028636	-0.102431	1.46574	0.00453205	0.0446485
CEP135	chr4_56011560	-0.0537865	0.462926	1.38525e-13	1.18153e-10
ADGRL3	chr4_61909762	-0.0380426	-0.00534057	0.00217917	0.0268906
UBA6	chr4_67681515	-0.0845053	0.888905	1.76902e-06	9.40411e-05
UBA6	chr4_67696712	-0.0995498	1.02383	0.00237078	0.0284622
YTHDC1	chr4_68337917	0.0204475	0.392439	0.00222778	0.0272376
COX18	chr4_73065173	-0.020435	0.601142	0.00291303	0.0328256
EREG	chr4_74384571	0.235514	-3.41356	0.0021977	0.0270644
RCHY1	chr4_75517017	-0.0292051	0.681988	9.01254e-06	0.00035542
THAP6	chr4_75517017	-0.0225765	0.378399	0.000100625	0.00251846
CNOT6L	chr4_77773174	-0.0240797	0.53757	0.000773156	0.0122763
CNOT6L	chr4_77776399	-0.0498441	0.789643	7.77304e-05	0.00202954
FRAS1	chr4_78407576	-0.108217	0.808116	0.00506165	0.0482563
FRAS1	chr4_78521646	-0.12776	0.637913	0.000206228	0.00439227
PAQR3	chr4_78926481	-0.0517119	0.674648	1.23614e-05	0.000460176
ANTXR2	chr4_79984777	-0.0858757	1.23063	6.87695e-07	4.23124e-05
ANTXR2	chr4_80036035	-0.100649	2.41269	8.9783e-06	0.000355124
TMEM150C	chr4_82502937	0.0638287	-0.840925	0.000126825	0.00303149
SEC31A	chr4_82819011	0.105119	-0.388226	2.94088e-06	0.000147488
SEC31A	chr4_82864412	0.214339	-1.07997	2.2502e-22	1.49526e-18
GPAT3	chr4_83598623	-0.0364686	0.448921	0.00445234	0.0441579
TRMT44	chr4_8471059	-0.037722	0.111267	0.000264205	0.00528807
WDFY3	chr4_84773036	-0.0495913	0.481846	4.41335e-07	2.96229e-05
WDFY3	chr4_84789633	-0.010352	0.0466494	0.00526462	0.0496219
WDFY3	chr4_84794752	-0.0862204	0.741202	6.32922e-05	0.00170966
HERC6	chr4_88437061	-0.0711107	0.782084	0.00321281	0.0349986
ATOH1	chr4_93830677	-0.210646	2.97775	0.001509	0.02036
PDLIM5	chr4_94586958	-0.0153094	0.816868	0.00252187	0.0297653
EIF4E	chr4_98881150	-0.030547	0.34951	0.000701792	0.0114159
EIF4E	chr4_98885065	-0.0668697	0.664768	0.00192212	0.0244216
ADH1C	chr4_99339513	0.186919	-1.49013	0.00107451	0.0157618
DAPP1	chr4_99863719	-0.0616329	1.03134	0.000307387	0.00596375
MARCHF6	chr5_10394800	0.0175474	0.37573	0.00328636	0.0355956
FER	chr5_108832743	-0.0400545	0.573798	0.00018114	0.00395945
FER	chr5_108867751	-0.0383651	0.124904	8.52445e-06	0.000339192
YTHDC2	chr5_113534291	-0.0780409	0.793254	0.00483124	0.0467982
YTHDC2	chr5_113553158	-0.031281	0.779627	1.49687e-05	0.000535239
YTHDC2	chr5_113567889	-0.0431692	0.588046	0.000133178	0.00315497
YTHDC2	chr5_113579559	-0.154125	1.4693	0.000278853	0.00555617
KCNN2	chr5_114404915	0.218018	-2.93919	0.000539707	0.00930312
DMXL1	chr5_119165287	-0.0179667	0.188789	4.74044e-06	0.000214287
DMXL1	chr5_119240402	-0.0416623	0.413103	0.000314589	0.00605926
TNFAIP8	chr5_119392801	-0.0676027	0.860318	0.00355444	0.0374909
SNX24	chr5_122946015	-0.0331628	0.460181	0.00345013	0.03677
PRRC1	chr5_127530428	-0.0628514	1.16973	0.000147903	0.00341256
SLC12A2	chr5_128186462	0.0476716	0.12135	0.0037637	0.0391696
RAPGEF6	chr5_131603333	-0.050085	0.24794	1.79434e-05	0.000621009
RAD50	chr5_132591859	-0.0807116	0.30134	3.41382e-05	0.00103113
VDAC1	chr5_133980635	0.0268902	1.35229	1.11086e-06	6.3635e-05
VDAC1	chr5_133981017	0.0870291	0.712393	4.54026e-07	3.03217e-05
CDKL3	chr5_134319339	-0.0428796	-0.223256	0.00011294	0.00276932
SAR1B	chr5_134608354	-0.0371287	0.846395	2.89241e-08	3.05081e-06
SEC24A	chr5_134671904	-0.113276	1.49712	0.000388909	0.00714882
SEC24A	chr5_134679806	-0.0750775	1.22993	0.000891115	0.0136126
SEC24A	chr5_134697265	-0.0740132	1.06123	0.00395382	0.0405449
SEC24A	chr5_134703941	-0.131235	2.05826	6.29994e-06	0.000270085
DNAH5	chr5_13814868	-0.121369	0.324982	0.00022036	0.00458307
IK	chr5_140651576	0.0401378	0.59643	0.000923312	0.0140549
PCDHGA5	chr5_141415642	-0.074235	-0.0728633	0.00442551	0.0439903
DIAPH1	chr5_141527700	0.015562	0.840148	0.000569619	0.00968872
TRIO	chr5_14388689	0.0345981	-0.126548	2.29285e-06	0.000118109
TRIO	chr5_14485053	0.0480615	-0.253991	2.70204e-09	4.1276e-07
RBM27	chr5_146267757	0.063461	-0.481104	0.00116285	0.0167074
STK32A	chr5_147351175	0.171691	-3.17307	0.00310337	0.0342501
DCTN4	chr5_150731327	-0.0600225	1.13778	0.00102132	0.0151595
TTC1	chr5_160051083	0.0338307	0.630646	0.00190112	0.0242242
GABRB2	chr5_161459858	0.889928	-9.46861	2.33027e-05	0.00076279
MYO10	chr5_16763617	0.134201	-0.815916	1.04102e-05	0.000398706
MYO10	chr5_16783515	0.221542	-1.33908	0.00378291	0.0392376
SPDL1	chr5_169593334	-0.047928	0.623828	1.8677e-05	0.00063809
GABRP	chr5_170794215	-0.349101	2.83533	0.00138896	0.0191287
ATP6V0E1	chr5_172994758	0.0508079	1.01633	1.12974e-09	2.15399e-07
CANX	chr5_179726577	0.0251293	1.40199	0.00136261	0.0188593
BTNL9	chr5_181054217	-0.0739383	0.955065	3.03147e-07	2.19341e-05
DROSHA	chr5_31483647	0.0376919	-0.150182	0.000411325	0.00748858
ZFR	chr5_32404056	0.162699	-0.651258	1.01981e-06	5.89271e-05
SLC1A3	chr5_36629416	-0.0671037	1.31486	5.81969e-05	0.00160798
SLC1A3	chr5_36629700	-0.111046	0.884762	1.36685e-07	1.13534e-05
NIPBL	chr5_37027475	0.0267349	-0.0641668	0.00306877	0.0340206
FYB1	chr5_39119039	-0.0697893	0.667332	0.000508328	0.00880793
PAIP1	chr5_43536803	0.0342625	0.483138	0.000746528	0.0119968
PLPP1	chr5_55425792	0.18463	-1.30322	1.70681e-05	0.000593809
MIER3	chr5_56946817	0.0525056	-0.103647	0.00267359	0.0309143
PDE4D	chr5_58974631	-0.0519028	0.358867	0.00094755	0.0143102
PDE4D	chr5_58990911	-0.0516936	0.438107	0.000707506	0.0114808
DEPDC1B	chr5_60605866	-0.0683227	0.988422	0.000154461	0.0035407
ERCC8	chr5_60874686	-0.050773	0.203035	0.000204314	0.00435849
IPO11	chr5_62515619	-0.186608	2.82498	0.000697731	0.0113638
ADAMTS6	chr5_65333998	-0.010627	-0.281143	8.93667e-05	0.00229726
CENPK	chr5_65567658	-0.0203913	0.324744	0.00503482	0.0480414
SREK1	chr5_66170197	-0.0994894	0.978878	0.00177797	0.0230754
FAM169A	chr5_74839974	-0.162246	1.13508	0.000126409	0.00302697
CERT1	chr5_75426481	-0.0422914	0.462119	5.9005e-05	0.00162692
IQGAP2	chr5_76671690	-0.0361537	1.08946	0.00233044	0.028156
WDR41	chr5_77489582	-0.0278416	0.756027	8.14877e-10	1.77536e-07
TMEM161B	chr5_88206509	-0.0244856	0.147796	0.000108424	0.00268117
SEMA5A	chr5_9043031	0.168197	-1.42399	0.000845261	0.0131549
ADGRV1	chr5_90706404	-0.050829	-0.567855	0.00497874	0.0477841
ADGRV1	chr5_91149988	-0.270588	9.44107	3.47336e-06	0.000169709
TTC37	chr5_95469982	0.0429209	-0.093863	0.00195115	0.024696
TTC37	chr5_95498628	0.0797621	-0.686913	1.64428e-12	9.93297e-10
TTC37	chr5_95507015	0.0833877	-0.344242	5.17143e-15	8.59104e-12
ARSK	chr5_95567872	-0.0527407	0.422175	2.94585e-05	0.000914727
ELL2	chr5_95898092	-0.039013	0.828527	0.00230399	0.0279635
ERAP2	chr5_96884035	0.15406	-1.52666	3.25105e-13	2.54155e-10
ERAP2	chr5_96895155	-0.188656	2.0176	6.72899e-09	9.4184e-07
CHD1	chr5_98896453	-0.107364	1.25394	0.00221654	0.0271953
ASCC3	chr6_100540391	-0.0320634	0.644628	0.00138441	0.0190859
HACE1	chr6_104785370	-0.0496571	0.266597	2.50182e-12	1.27881e-09
BEND3	chr6_107099237	-0.0391873	0.312058	1.53841e-05	0.000545968
SEC63	chr6_107901524	0.0566633	-0.26066	0.000848286	0.0131549
SEC63	chr6_107921916	0.0706951	-0.608788	4.16563e-13	3.07562e-10
AFG1L	chr6_108476763	-0.10419	0.846229	0.00202159	0.0253941
SESN1	chr6_108998765	0.155047	-1.39017	0.000737795	0.0119141
RPF2	chr6_111008019	0.0163241	0.367729	0.00498206	0.0477841
SLC16A10	chr6_111221890	-0.0690016	0.302006	2.9039e-05	0.000903814
MFSD4B	chr6_111266158	-0.0597295	0.106944	0.00194337	0.0246209
REV3L	chr6_111381246	-0.0454926	0.382367	0.00017682	0.00389708
LAMA4	chr6_112141263	0.12829	-1.14013	0.00187504	0.0239609
FRK	chr6_115943224	-0.0606662	0.763506	3.5943e-06	0.000173703
DCBLD1	chr6_117563399	-0.110672	1.23284	6.95687e-05	0.00183811
CEP85L	chr6_118482033	-0.0601355	0.506213	2.84646e-05	0.000888014
PTPRK	chr6_128009279	0.095904	-0.197777	2.80938e-11	1.06676e-08
PTPRK	chr6_128240165	0.0520411	0.344578	0.0025847	0.0303183
ENPP3	chr6_131627325	0.156206	-2.90218	6.53477e-05	0.00175095
ENPP3	chr6_131627677	0.0748445	-1.35767	0.000645838	0.0107156
ENPP3	chr6_131718751	0.269744	-2.63212	0.000146577	0.00339373
SLC18B1	chr6_132772093	-0.0697687	2.07508	0.00313836	0.0344578
SLC18B1	chr6_132787620	-0.0637843	1.54344	0.000760599	0.0121349
MAP3K5	chr6_136562355	-0.0730286	1.28389	0.00304842	0.0338742
MAP3K5	chr6_136611466	-0.0832047	1.31319	0.00250682	0.0296931
ADGRG6	chr6_142309746	-0.149042	1.61459	2.39303e-06	0.000122321
ADGRG6	chr6_142370814	-0.123248	1.8548	2.38631e-12	1.27881e-09
ADGRG6	chr6_142438199	-0.135175	1.34987	0.00434265	0.0433172
UTRN	chr6_144482395	-0.0672132	1.09253	0.000704461	0.0114453
SHPRH	chr6_145935180	-0.0494331	0.170292	1.15111e-06	6.48233e-05
STXBP5	chr6_147334232	-0.14184	1.94049	0.000131719	0.00312597
SASH1	chr6_148471378	-0.0090928	0.198582	0.00238612	0.0285433
UST	chr6_148953772	-0.0753246	0.919723	8.19717e-09	1.10041e-06
PCMT1	chr6_149773017	0.0337286	0.56544	0.00377477	0.0392315
CCDC170	chr6_151538012	0.0441803	-0.848229	0.00292427	0.0328795
SYNE1	chr6_152231570	-0.0821958	0.222412	3.08247e-06	0.000153431
SYNE1	chr6_152308638	-0.0300577	-0.074649	0.000670131	0.0110087
SYNE1	chr6_152380928	-0.0643382	0.174451	3.73237e-06	0.000179073
SYNE1	chr6_152419547	-0.0252497	-0.191	1.89514e-07	1.49919e-05
DTNBP1	chr6_15651412	0.0329095	0.183467	0.00387993	0.0400034
ZDHHC14	chr6_157628320	-0.0347374	0.284696	0.000807793	0.0126794
SERAC1	chr6_158148993	-0.026941	0.176007	0.00419631	0.0421853
SOD2	chr6_159736246	-0.0923216	1.72835	0.000354746	0.00666843
WTAP	chr6_159742074	-0.0676988	1.26049	0.000847515	0.0131549
SLC22A3	chr6_160436731	0.13691	-1.10997	1.96149e-07	1.53342e-05
MAP3K4	chr6_161102803	-0.00972194	0.358106	0.0011098	0.0161547
PDE10A	chr6_165396475	-0.0890583	0.0996743	8.96176e-06	0.000355124
SMOC2	chr6_168549266	0.221557	-1.41048	0.000586664	0.00991085
KIF13A	chr6_17777384	-0.024586	0.691856	0.000136957	0.00323295
SOX4	chr6_21596270	0.0944786	0.186352	0.000689255	0.0112622
CARMIL1	chr6_25426413	-0.036384	1.10842	0.000573767	0.0097286
CARMIL1	chr6_25556905	-0.0345153	1.18217	0.000463896	0.00822024
NQO2	chr6_3006588	-0.090704	1.37894	0.000967967	0.0145853
ABCF1	chr6_30578077	0.047146	0.660309	0.00167012	0.0219544
ABCF1	chr6_30580347	0.0463073	-0.0550633	0.000418953	0.00759602
ABCF1	chr6_30589603	0.0324339	0.722251	0.00450877	0.0444852
FLOT1	chr6_30740835	0.0420746	0.678305	9.15093e-07	5.43968e-05
DDR1	chr6_30891528	0.0449861	0.279481	0.00425938	0.0427457
NEU1	chr6_31864580	0.0735528	-0.0891516	0.000395911	0.00726747
SLC44A4	chr6_31864580	0.0705821	0.635085	0.00323783	0.0352422
PPT2-EGFL8	chr6_32155564	0.0362854	-2.27755	0.00449783	0.0444102
RNF5	chr6_32179515	0.0794375	0.439712	3.03417e-07	2.19341e-05
HLA-DQA1	chr6_32642376	0.022407	0.209309	0.00375664	0.0391268
SNRPC	chr6_34770223	0.0978746	0.734784	0.00144024	0.0196518
SRPK1	chr6_35842607	0.055191	0.181066	0.000407968	0.00744766
ETV7	chr6_36391906	-0.0812525	1.31437	0.000207066	0.00439637
KCTD20	chr6_36484827	0.0187202	0.446427	0.000170261	0.00380264
STK38	chr6_36515205	0.0782956	0.390002	0.00463867	0.045463
FGD2	chr6_37017105	-0.0483796	0.12847	0.00397047	0.040623
ZFAND3	chr6_37930036	0.0599486	-0.347058	0.000376456	0.00696811
KIF6	chr6_39613112	0.195336	-3.19398	0.00297107	0.0331303
XPO5	chr6_43546791	0.0425406	0.036996	0.00501578	0.0479659
XPO5	chr6_43570765	0.0432714	0.0565725	0.00241954	0.0288651
HSP90AB1	chr6_44248808	0.103877	1.27044	0.000460889	0.00817785
SLC25A27	chr6_46668820	0.0496826	-0.731742	0.00402116	0.041014
CDYL	chr6_4943771	0.0228679	0.249928	0.00294027	0.0329757
MMUT	chr6_49447639	0.0244872	0.308975	4.36919e-06	0.000200956
PKHD1	chr6_51638800	-0.0693668	-0.200004	0.00372505	0.0389197
GSTA4	chr6_52982470	-0.121469	1.91655	0.000614123	0.0102792
BMP5	chr6_55874914	0.220369	-3.48289	0.000742489	0.0119464
COL21A1	chr6_56064627	0.485228	-7.49549	2.80971e-05	0.000888014
COL21A1	chr6_56157073	0.184979	-3.38651	0.00133144	0.0185674
KIAA1586	chr6_57054930	-0.0634382	0.479203	0.000211491	0.00445439
COL19A1	chr6_70130233	0.255862	-4.34892	0.00148702	0.0201248
COL9A1	chr6_70260549	0.144641	-2.67058	0.000806879	0.0126794
COL9A1	chr6_70274186	0.201963	-2.65912	8.75902e-05	0.00226034
COL9A1	chr6_70281301	0.192251	-2.85586	0.000347683	0.0065635
COL9A1	chr6_70300245	0.269087	-4.24129	1.76441e-10	4.98915e-08
SMAP1	chr6_70798667	0.0693101	-0.646005	1.0869e-07	9.31933e-06
SMAP1	chr6_70861986	0.0429641	-0.717501	0.000142065	0.00332403
SLC17A5	chr6_73600509	-0.0546316	1.59489	0.00271648	0.0311224
DSP	chr6_7582538	0.0927127	0.44563	0.000666186	0.0109983
MYO6	chr6_75890141	0.241454	-1.52893	0.00100073	0.014952
SNRNP48	chr6_7595009	-0.0896161	1.16943	1.61002e-09	2.93112e-07
TENT5A	chr6_81749618	-0.103319	2.71045	0.00186684	0.023879
IBTK	chr6_82200557	-0.0722278	2.03577	0.000808082	0.0126794
IBTK	chr6_82220721	-0.0380412	0.983513	3.59879e-07	2.53058e-05
RWDD2A	chr6_83188582	-0.0489317	0.399854	6.91786e-05	0.00183144
ME1	chr6_83352146	-0.0659885	1.61788	1.25217e-06	7.02166e-05
CYB5R4	chr6_83940016	-0.0331993	0.401114	0.00153752	0.0206609
RNGTT	chr6_88853505	-0.0208477	0.520853	0.00295558	0.0330659
RNGTT	chr6_88891920	-0.0695784	1.53442	0.00134018	0.0186502
RNGTT	chr6_88904672	-0.057962	1.16474	0.000587641	0.00991085
RNGTT	chr6_88929270	-0.0397302	0.685531	5.04356e-09	7.39851e-07
LYRM2	chr6_89629094	-0.0238699	0.577173	0.0018226	0.0235169
MMS22L	chr6_97168032	-0.0575486	0.234769	0.000479897	0.00842397
COQ3	chr6_99369824	-0.0572023	1.19709	4.55315e-05	0.00131546
TSTD3	chr6_99558420	-0.03796	-0.212737	0.000668207	0.0110043
MCM7	chr7_100099419	0.0356736	0.97621	0.000139261	0.00326415
AP4M1	chr7_100105785	0.0522986	-0.233091	0.00363788	0.0382444
MOGAT3	chr7_101200089	0.283943	-3.08407	0.000117907	0.00288048
CUX1	chr7_102196577	0.125606	-0.391314	0.000353458	0.00665755
ARMC10	chr7_103086605	0.0354523	0.270141	4.16022e-07	2.83535e-05
KMT2E	chr7_105041051	0.0308987	0.249712	0.000862231	0.0132828
KMT2E	chr7_105107338	0.0862254	-0.39518	5.00538e-05	0.00141535
PUS7	chr7_105482445	0.0354183	0.0458338	0.00129597	0.0181873
SLC26A3	chr7_107767527	1.13531	-9.42022	2.82295e-07	2.09593e-05
SLC26A3	chr7_107773862	0.703595	-6.25974	0.000211905	0.00445605
PHF14	chr7_11061768	0.0329612	-0.192858	0.0037775	0.0392315
DOCK4	chr7_111834694	-0.095545	0.880919	1.83548e-05	0.000630322
GPR85	chr7_113084895	-0.0386902	-0.154171	6.37518e-06	0.000272431
MET	chr7_116769622	0.0704717	0.10734	2.15109e-08	2.40235e-06
ST7	chr7_116956743	0.126865	-0.956809	0.00431736	0.0431459
ST7	chr7_117138390	-0.0287622	0.548048	0.00373343	0.0389767
CFTR	chr7_117548875	0.39011	-2.57851	0.000770743	0.0122526
CFTR	chr7_117610426	0.219883	-3.33086	9.93864e-06	0.000383966
COPG2	chr7_130612249	-0.121014	1.74579	0.000434868	0.00780999
CUL1	chr7_148797703	0.0274746	0.596067	2.55495e-08	2.71642e-06
GIMAP2	chr7_150687106	0.0157647	-0.0556566	0.000207083	0.00439637
RHEB	chr7_151502229	0.0683993	-0.0221436	1.68557e-05	0.000589505
KMT2C	chr7_152177063	0.0858928	-0.724462	0.00307432	0.0340206
ESYT2	chr7_158793765	0.0569414	0.500269	0.00350684	0.0371658
SOSTDC1	chr7_16465430	0.190066	-1.7421	0.000573907	0.0097286
BZW2	chr7_16682768	0.064472	0.556275	1.80913e-05	0.000624503
NUP42	chr7_23199445	0.0622609	-0.569166	2.04243e-06	0.000107714
EIF3B	chr7_2364260	0.100102	0.125308	1.24803e-05	0.00046259
EIF3B	chr7_2367103	0.0718815	0.234361	1.26396e-10	3.73291e-08
HNRNPA2B1	chr7_26197875	0.0656558	0.981397	0.000208464	0.00441864
CBX3	chr7_26197875	0.0876553	0.593235	1.2816e-05	0.000470511
CBX3	chr7_26208365	0.0793699	0.540735	1.12705e-06	6.42852e-05
CHN2	chr7_29507148	0.0546327	-1.43331	0.00160459	0.0213891
CRHR2	chr7_30655167	0.382468	-4.32129	0.00210332	0.0261979
AVL9	chr7_32553623	0.106964	-0.762075	1.43869e-09	2.65558e-07
AVL9	chr7_32554539	0.169539	-1.05011	0.00118048	0.0169144
ANLN	chr7_36427060	-0.130239	1.87676	0.000189118	0.00410012
VPS41	chr7_38771281	0.0220129	0.240343	0.00188434	0.0240566
CAMK2B	chr7_44220801	-0.227821	0.89036	0.00261878	0.0305831
PPIA	chr7_44801187	0.034546	1.13075	4.40575e-06	0.000201905
WIPI2	chr7_5199689	0.0478405	-0.086671	7.19779e-10	1.59431e-07
TNRC18	chr7_5390359	0.0508497	0.037452	2.84135e-06	0.00014358
VOPP1	chr7_55497555	0.0375481	0.21079	0.0010013	0.014952
NIPSNAP2	chr7_55984797	0.0723696	0.134511	0.00426171	0.0427457
PSPH	chr7_56017420	0.0393892	-0.159818	0.000293358	0.00579306
EIF2AK1	chr7_6024840	0.0493443	0.604165	9.40415e-09	1.22531e-06
EIF2AK1	chr7_6037533	0.157321	-0.0252485	0.00237677	0.0285083
EIF2AK1	chr7_6041223	0.101226	0.183245	1.42471e-05	0.000513126
PRKAR1B	chr7_607322	0.083781	-0.134961	0.00231762	0.0280777
KDELR2	chr7_6446110	0.0504558	1.15077	0.00162814	0.0216124
CRCP	chr7_66134252	0.0877881	-1.04177	7.44164e-07	4.55757e-05
ELN	chr7_74065617	0.0957089	-1.3351	0.00102909	0.0152471
SEMA3C	chr7_80797998	0.262817	-1.52273	4.8213e-05	0.00137796
SEMA3C	chr7_80827393	0.0664036	-0.597213	9.34654e-15	1.28042e-11
ICA1	chr7_8143998	0.128273	-1.11095	0.00262966	0.0306281
ANKIB1	chr7_92371410	0.0743936	-0.179337	0.000332363	0.00631015
ANKIB1	chr7_92391139	0.0341965	0.0847013	0.00266321	0.0308849
SGCE	chr7_94552274	-0.0568396	0.030161	0.000658392	0.0108831
PON3	chr7_95359944	-0.0840759	0.695911	0.000194215	0.00417657
SLC25A13	chr7_96146537	0.0926779	-0.432657	1.95113e-10	5.29194e-08
SLC25A13	chr7_96189553	0.0571161	-0.124458	2.46389e-08	2.64073e-06
SLC25A13	chr7_96234733	0.0702238	-0.365398	0.000419594	0.00759729
SPAG1	chr8_100240858	0.0750186	-1.07423	0.0011056	0.0161112
PABPC1	chr8_100712799	0.0368335	1.10561	8.32912e-08	7.42913e-06
YWHAZ	chr8_100920796	0.0436746	1.33049	1.0208e-05	0.000392296
YWHAZ	chr8_100923879	0.0978215	0.800519	2.97568e-07	2.1849e-05
UBR5	chr8_102275623	0.0645991	-0.418344	3.03677e-07	2.19341e-05
UBR5	chr8_102304963	0.0477077	-0.315061	4.88464e-06	0.000218067
KLF10	chr8_102653448	0.131088	-0.166751	0.000197017	0.00422316
DCAF13	chr8_103427259	0.0846432	-0.29054	0.00184202	0.0236526
EIF3E	chr8_108234961	0.0239911	0.286615	3.70233e-05	0.00109586
PKHD1L1	chr8_109493638	-0.395582	2.35192	0.00256781	0.0301734
RAD21	chr8_116856293	0.0129729	1.04842	0.00161627	0.0215233
TAF2	chr8_119788453	0.0588771	-0.22587	0.00268989	0.0309512
MRPL13	chr8_120443319	0.0194966	0.470388	0.00313188	0.0344559
C8orf76	chr8_123220311	-0.0398406	0.236509	0.00211082	0.0262421
FAM91A1	chr8_123805366	0.0407533	0.132671	0.0041348	0.0416614
ASAP1	chr8_130169104	0.0360548	-0.102391	0.00479883	0.0466543
ASAP1	chr8_130180908	0.0388811	-0.233859	9.31242e-05	0.00236789
VPS37A	chr8_17242944	-0.0262477	0.625331	0.00235773	0.0283568
MTUS1	chr8_17647118	-0.0939422	1.29727	0.000294733	0.00579437
DOCK5	chr8_25382611	-0.153082	1.35328	4.49968e-08	4.39712e-06
ESCO2	chr8_27780150	-0.134973	1.19751	1.29438e-06	7.20561e-05
PBK	chr8_27833025	-0.144284	2.16436	3.08686e-05	0.000949637
GTF2E2	chr8_30607203	-0.0571116	1.52733	0.00392033	0.0402948
GSR	chr8_30712093	-0.0909422	2.21045	0.000756167	0.0120932
WRN	chr8_31076301	-0.0369374	0.314553	0.00313877	0.0344578
CSMD1	chr8_3188775	-0.127969	-0.630043	0.00254019	0.0299017
TTI2	chr8_33497339	-0.0386498	0.748037	2.02831e-08	2.32381e-06
MAK16	chr8_33497339	-0.0291227	0.796536	0.000154427	0.0035407
TTI2	chr8_33498674	-0.024337	0.479703	3.54454e-06	0.000172553
TTI2	chr8_33499308	-0.0491118	0.591163	6.62155e-05	0.00177063
ADAM9	chr8_39016217	-0.232145	2.6703	8.35416e-07	5.04667e-05
ADAM9	chr8_39054603	-0.0281619	1.23893	0.000473942	0.00834263
ADAM9	chr8_39082625	-0.0735153	1.47379	0.000143396	0.00334926
SLC20A2	chr8_42437613	0.0770916	-1.16125	0.00330523	0.0357417
PRKDC	chr8_47819514	0.0366117	0.220234	2.32157e-08	2.54989e-06
PRKDC	chr8_47900274	0.0921118	0.0802267	0.000689798	0.0112622
PRKDC	chr8_47954350	0.134914	-0.510256	0.000233738	0.00479877
PRKDC	chr8_47955958	0.126186	-0.418239	0.000285539	0.00568086
ALKAL1	chr8_52539800	0.069309	-1.07723	0.00284844	0.0323554
RB1CC1	chr8_52630531	0.0600243	-0.412937	4.70208e-07	3.10899e-05
MRPL15	chr8_54137473	0.0900951	0.47765	0.000198552	0.00424374
ASPH	chr8_61583863	-0.0493095	1.36258	4.77572e-06	0.00021515
ASPH	chr8_61626384	-0.104753	1.88793	6.52657e-05	0.00175095
ASPH	chr8_61638366	-0.0453129	1.25034	9.76675e-06	0.000380645
ASPH	chr8_61644637	-0.0917512	1.6487	1.69568e-05	0.000591484
GGH	chr8_63035627	0.111614	-0.980834	2.63548e-09	4.12065e-07
ADHFE1	chr8_66445101	0.292827	-3.49957	9.70919e-05	0.00245314
CSPP1	chr8_67149948	-0.0089878	-0.0802041	0.00133498	0.0185974
ARFGEF1	chr8_67180024	0.0413125	0.0984163	0.00499271	0.0478252
ARFGEF1	chr8_67228149	0.0784851	-0.239588	4.14847e-05	0.00121707
ARFGEF1	chr8_67302475	0.120061	-0.557019	3.18012e-05	0.000973821
TRPA1	chr8_72046457	-0.1216	2.86022	0.00118348	0.0169304
TRPA1	chr8_72057020	-0.199055	1.48335	0.00372456	0.0389197
RPL7	chr8_73292189	0.0463756	1.45009	4.21531e-07	2.84373e-05
CDH17	chr8_94174283	0.0912614	0.758048	3.57632e-06	0.000173465
RAD54B	chr8_94411324	-0.0721184	0.2795	0.000137672	0.00324273
ESRP1	chr8_94705904	0.027694	0.853991	0.000215433	0.00451593
DPY19L4	chr8_94781057	0.0225327	-0.143094	0.00193265	0.0245319
INTS8	chr8_94849558	0.0486668	-0.140226	0.00215598	0.0266787
TNKS	chr8_9706288	-0.0855198	1.34238	0.000124968	0.00300331
LAPTM4B	chr8_97805325	0.134403	-1.09242	1.53455e-16	4.07882e-13
RPL30	chr8_98042609	0.0395806	1.12918	2.25864e-05	0.000743003
RAD23B	chr9_107331686	0.0276667	0.993054	0.000355736	0.00666896
ELP1	chr9_108917468	-0.0177437	0.296775	0.00406127	0.0411934
CDK5RAP2	chr9_120470227	0.0375472	-0.401434	0.00496017	0.047725
STRBP	chr9_123147678	0.0116652	0.29327	0.0012894	0.0181143
MAPKAP1	chr9_125565742	0.01579	0.340461	4.1887e-11	1.50454e-08
ZNF79	chr9_127444017	0.0457345	-0.480675	0.000110386	0.00271673
TOR1B	chr9_129810336	0.0360207	0.678458	0.000847147	0.0131549
FNBP1	chr9_129895801	0.0616434	-0.204562	0.00354722	0.0374742
FNBP1	chr9_129903043	0.062899	-0.267011	0.00154797	0.020755
FUBP3	chr9_130622843	0.0254922	0.244947	2.96032e-07	2.1849e-05
AIF1L	chr9_131120400	-0.395755	2.52063	0.000294389	0.00579437
CCDC171	chr9_15729858	-0.0759781	0.235172	0.00263185	0.0306281
DENND4C	chr9_19299212	0.05203	-0.290502	0.00485565	0.0469321
DENND4C	chr9_19334960	0.0481597	-0.140275	0.00339173	0.0363224
MTAP	chr9_21815591	-0.029411	0.478448	0.00014394	0.00335505
MTAP	chr9_21861904	-0.0442511	0.470995	4.00043e-05	0.00117884
C9orf72	chr9_27548436	-0.0166314	0.49315	0.00178604	0.023135
PUM3	chr9_2812379	0.107834	0.0586372	0.00386756	0.0399068
DDX58	chr9_32481503	-0.0399635	0.827802	5.94501e-05	0.00163514
BAG1	chr9_33262658	-0.0617203	1.95889	0.00113607	0.0164829
UBE2R2	chr9_33912105	0.0449135	0.662733	0.000429683	0.00775881
UBAP1	chr9_34224147	0.0791946	0.429988	0.00478623	0.0465658
MELK	chr9_36671223	-0.0623155	1.20676	0.00125992	0.0177753
DOCK8	chr9_376187	-0.0673729	0.417233	0.00318277	0.0346998
FRMPD1	chr9_37733711	0.381386	-4.50593	0.00149199	0.0201714
DOCK8	chr9_432141	-0.0783115	0.691034	4.81517e-05	0.00137796
JAK2	chr9_5122911	-0.127276	1.35455	2.65719e-11	1.03865e-08
RIC1	chr9_5738546	-0.0150968	0.306121	0.000295942	0.00580305
GDA	chr9_72231272	-0.0753836	1.22057	0.000669696	0.0110087
VPS13A	chr9_77282303	-0.0521399	0.577274	0.000618975	0.010337
VPS13A	chr9_77283342	-0.128658	1.05772	0.00469273	0.0458162
PTPRD	chr9_8341281	0.236419	-4.01491	1.06996e-09	2.09114e-07
HNRNPK	chr9_83978332	0.0256594	1.35208	5.15424e-07	3.32524e-05
SLC28A3	chr9_84305203	-0.126362	1.77022	3.56418e-07	2.53058e-05
CENPP	chr9_92417563	-0.0382847	-0.0253209	0.00314141	0.0344578
ZNF169	chr9_94301444	-0.0359079	0.0931126	0.002974	0.0331303
PTCH1	chr9_95468643	0.0742231	-0.81098	0.00262748	0.0306281
CTSV	chr9_97036760	0.193565	-1.64202	0.000480464	0.00842397
CCDC180	chr9_97330067	-0.0413304	-0.144491	0.00354316	0.0374611

## Sheet: STAD
gene	str_id	coef	intercept	p_value	adj_p
CHUK	chr10_100233167	-0.0527668	1.13032	2.47998e-07	6.09721e-05
TRUB1	chr10_114975476	-0.0516196	1.30101	0.00108008	0.0324413
PRDX3	chr10_119173610	-0.27635	7.82852	0.00205767	0.0475975
PRPF18	chr10_13605580	-0.0130671	0.48221	0.00208748	0.0481574
PRTFDC1	chr10_24851485	0.132911	-0.816123	1.45191e-06	0.0002525
APBB1IP	chr10_26513705	0.0560589	-0.221902	0.00217253	0.0494204
IPMK	chr10_58252437	-0.0309396	0.70373	0.000158776	0.00898861
SUPV3L1	chr10_69202394	-0.0494947	1.0355	0.00133286	0.0364738
TNKS2	chr10_91842189	0.176076	-0.834108	0.000275249	0.0128963
KIF11	chr10_92606591	-0.069761	2.18035	0.00059564	0.0219038
NOC3L	chr10_94349232	-0.0674965	1.07187	9.23776e-06	0.00106242
HELLS	chr10_94558082	-0.1152	1.2538	0.00022984	0.0114322
ZNF518A	chr10_96159099	-0.201886	1.94156	2.39493e-06	0.000355316
CASP5	chr11_105008960	-0.174551	2.15135	0.000517438	0.0201473
C11orf65	chr11_108317540	-0.0467645	0.133485	0.000287712	0.0132394
DLAT	chr11_112045042	-0.0791972	1.8956	4.71894e-07	0.000106859
CEP164	chr11_117351932	0.0778731	-0.866951	0.000110912	0.00701766
VSIG2	chr11_124754810	0.145384	-1.60824	0.000907252	0.0288077
ESAM	chr11_124754810	0.0663055	-0.175138	6.86154e-05	0.00487963
NCAPD3	chr11_134185531	-0.11018	1.44072	0.00110696	0.0327332
NCAPD3	chr11_134194634	-0.0670305	1.09719	0.000249409	0.0121252
NCAPD3	chr11_134202910	-0.144869	1.70218	7.33366e-05	0.0051028
TNNT3	chr11_1923009	-0.589689	6.6674	9.25989e-06	0.00106242
MUC15	chr11_26559836	0.143749	-5.12363	0.00148864	0.0389353
ARFGAP2	chr11_47165521	0.0295645	0.179434	2.00398e-06	0.000325363
SLC22A9	chr11_63382199	0.340994	-5.13776	0.00150431	0.039131
LTBP3	chr11_65547349	0.10561	-0.800887	0.000839312	0.0272165
AIP	chr11_67487292	0.263424	-2.83255	0.00180375	0.0441682
NDUFC2	chr11_78073101	0.15659	-0.887936	1.46717e-06	0.0002525
CTSC	chr11_88335085	-0.0491186	1.54466	0.00124997	0.0349566
MRE11	chr11_94479765	0.0813255	-0.642497	7.6527e-08	2.9768e-05
RIC8B	chr12_106843837	-0.0263028	0.301841	0.00210821	0.0482478
ACACB	chr12_109264155	0.0620516	-0.885293	0.00196152	0.0461172
NAA25	chr12_112078151	-0.0516446	0.898286	0.000540103	0.0205645
RNF10	chr12_120566762	0.0262914	0.507197	0.00109326	0.0324413
DIABLO	chr12_122216455	-0.0884744	0.357325	0.00141112	0.0378277
DNAH10	chr12_123757912	-0.0576992	0.159027	4.44939e-05	0.0035451
SLCO1B1	chr12_21174719	-0.199171	1.10205	0.0010072	0.0311761
ETFBKMT	chr12_31666254	-0.108195	0.801318	0.00129578	0.0356235
PARP11	chr12_3826111	-0.0841594	1.05419	5.43498e-05	0.00410246
RAD51AP1	chr12_4535996	-0.117698	1.77851	2.05606e-06	0.000327637
GLS2	chr12_56478987	-0.05878	0.353511	7.54968e-06	0.000928071
R3HDM2	chr12_57283738	0.0899324	-0.743679	0.000212903	0.0107767
IFNG	chr12_68158262	-0.663993	11.785	0.000478237	0.0193203
CNOT2	chr12_70353914	0.0301043	-0.103589	0.00140865	0.0378277
METTL25	chr12_82477232	-0.091715	0.830802	2.34368e-06	0.00035441
LRRIQ1	chr12_85229413	0.844402	-8.68898	0.000742716	0.0252611
A2M	chr12_9068228	0.134268	-0.329148	0.000355331	0.015754
CEP83	chr12_94309886	-0.0929021	0.643359	0.000114107	0.00711515
LAMP1	chr13_113310688	0.0437087	0.904098	2.34043e-06	0.00035441
NUP58	chr13_25324954	-0.022556	0.808419	0.000236897	0.0117155
HSPH1	chr13_31148484	0.145365	-1.19272	3.34945e-16	9.60734e-13
B3GLCT	chr13_31215029	-0.0455566	0.719701	0.000523533	0.0202018
BRCA2	chr13_32333399	-0.0552333	0.534235	0.000247121	0.0120822
FREM2	chr13_38861416	0.140691	-2.08449	0.0011644	0.0338501
ITM2B	chr13_48253967	0.035919	1.08038	0.00133518	0.0364738
CAB39L	chr13_49350730	0.167019	-1.60506	0.00119785	0.0341308
KCNRG	chr13_50011916	-0.1271	0.73192	3.05542e-11	3.28648e-08
MZT1	chr13_72719112	-0.0473614	1.6389	0.000374684	0.0161208
GPR180	chr13_94620988	-0.130288	1.5783	0.000948273	0.0296723
ABCC4	chr13_95021687	0.157854	-1.07798	0.00135889	0.0368871
RCOR1	chr14_102726438	-0.0377641	1.32639	0.00103448	0.0317917
SCFD1	chr14_30722463	-0.0202785	0.28697	0.000261412	0.0125668
GEMIN2	chr14_39124931	-0.0532533	0.721997	0.000700846	0.0243177
KLHL28	chr14_45028354	-0.0835479	0.912365	0.000135101	0.00818696
KLHL28	chr14_45044624	-0.117585	1.13741	0.0003107	0.0140714
L2HGDH	chr14_50294251	-0.0688423	0.86594	2.40727e-05	0.00218048
STYX	chr14_52746411	-0.0687652	1.14452	0.00113212	0.0332487
PCNX4	chr14_60150197	-0.0149902	0.126804	0.000358557	0.015754
FNTB	chr14_65006157	-0.0188331	0.321311	3.2513e-05	0.00274289
SLC10A1	chr14_69786333	-0.539887	2.30296	0.00016792	0.00932407
SMOC1	chr14_70030203	0.0923144	-1.904	0.00220436	0.0496559
DPF3	chr14_72723737	-0.0454281	0.348681	0.00194106	0.0460133
CEP128	chr14_80526987	-0.0436184	0.268577	0.000149037	0.00872424
TUBGCP5	chr15_23024903	-0.0439422	0.759109	0.000295374	0.0135197
DNAJC17	chr15_40767873	-0.0352389	0.467475	0.00109212	0.0324413
C15orf48	chr15_45432920	-0.147551	2.31758	0.000495103	0.0195945
CEP152	chr15_48805536	-0.0328446	0.415898	2.16778e-05	0.00200578
USP8	chr15_50490238	-0.0429119	0.737778	8.48017e-07	0.000169702
MYO5C	chr15_52269695	-0.0955095	1.40528	1.66484e-08	8.343e-06
MYO5C	chr15_52279074	-0.0814693	1.09045	9.50188e-05	0.00614765
ZNF280D	chr15_56654506	-0.0342117	0.197715	0.000649516	0.0231912
ADAM10	chr15_58682151	-0.102786	1.80045	1.3314e-06	0.000238682
ADAM10	chr15_58717732	-0.147024	2.25706	0.000161972	0.00910959
FAM81A	chr15_59401771	-0.0401042	0.455826	5.15457e-05	0.00396027
GTF2A2	chr15_59650605	-0.331155	4.08145	9.40639e-05	0.00613197
ICE2	chr15_60453583	-0.0837004	0.858411	0.00044525	0.0183782
TLN2	chr15_62748318	-0.04589	0.736338	0.000148389	0.00872424
TLN2	chr15_62770943	-0.0458014	0.822518	1.40616e-07	4.28066e-05
ZWILCH	chr15_66501961	-0.0566745	1.05376	0.000733435	0.0250445
FBXO22	chr15_75913183	-0.036641	0.64796	0.0018119	0.0441682
KNOP1	chr16_19714384	0.161093	-1.55853	6.36694e-07	0.000137121
THUMPD1	chr16_20737963	-0.0992865	1.65497	2.68134e-05	0.00235438
CCNF	chr16_2431054	-0.130013	1.25735	0.000635678	0.0228871
IL27	chr16_28501881	-0.307648	1.37549	0.000779737	0.0257074
FBRS	chr16_30654129	0.042709	-0.102502	9.18402e-05	0.00603271
MT1H	chr16_56671044	-0.503474	5.066	0.00142684	0.0380123
NAE1	chr16_66850441	-0.0637939	1.49802	0.00189721	0.0452231
DUS2	chr16_68054479	0.104333	-0.686111	0.000395616	0.0168528
IL34	chr16_70659970	0.0487969	-0.522958	0.00126591	0.0351391
ADAMTS18	chr16_77322414	0.210817	-2.50093	0.00192287	0.045708
CIBAR2	chr16_85105273	-0.559967	2.86159	0.000669902	0.0238203
SCO1	chr17_10692990	-0.0851412	1.15086	0.00163343	0.0414622
CHRNE	chr17_4901885	0.0686189	-1.10362	0.000775107	0.0256531
RPAIN	chr17_5421259	-0.0390623	0.367604	0.000626806	0.0227866
TOM1L1	chr17_54937082	-0.0338345	0.944294	7.6126e-05	0.00519892
PCTP	chr17_55767468	-0.19221	3.21578	0.00201578	0.0468806
BRIP1	chr17_61780239	-0.0760119	0.676001	7.95657e-08	2.9768e-05
CASKIN2	chr17_75518975	0.0752082	-0.767718	1.27714e-05	0.00135676
CHD3	chr17_7908559	0.0738662	-0.280631	8.2577e-05	0.00555137
MYH10	chr17_8513689	0.0642199	-0.407382	5.50818e-05	0.00412156
PIAS2	chr18_46844143	-0.0499426	0.464682	0.00124231	0.0349348
PIAS2	chr18_46864254	-0.0968501	1.49359	0.00164165	0.0415482
MYO5B	chr18_49911975	-0.176099	2.31401	5.35832e-06	0.000688184
MYO5B	chr18_49992460	-0.209779	2.45038	8.7829e-05	0.00585867
SMAD4	chr18_51058486	-0.0179551	0.507594	0.00169874	0.0424933
LMAN1	chr18_59345962	0.242416	-0.846719	6.38692e-08	2.61712e-05
RELCH	chr18_62275354	-0.0294048	0.697572	0.00160142	0.0408786
TNFRSF11A	chr18_62358226	-0.0570402	1.22211	0.000529085	0.0202528
VPS4B	chr18_63396988	-0.0322309	1.30744	0.00148841	0.0389353
CD226	chr18_69946709	-0.0355888	0.236081	0.00125805	0.0350341
RTTN	chr18_70142397	-0.0480362	0.402462	6.37403e-07	0.000137121
RAB3D	chr19_11337094	0.0631709	-0.331885	0.000407569	0.0171918
CYP4F12	chr19_15684757	0.0226276	-0.60275	0.00128219	0.0353629
ABHD8	chr19_17301169	0.154805	-0.246428	6.76537e-12	1.16432e-08
CRTC1	chr19_18747130	0.0476493	-0.51983	0.0017397	0.0430176
GARRE1	chr19_34333674	0.0359366	-0.596656	0.00114011	0.0332679
UBA2	chr19_34454427	0.0682561	0.241979	0.000155813	0.00887953
PIAS4	chr19_4013403	0.187027	-0.171233	0.000307491	0.0139998
STAP2	chr19_4331944	-0.127556	1.187	0.00158467	0.0408267
TOMM40	chr19_44903205	0.0782379	1.00825	0.00027543	0.0128963
APOE	chr19_44903205	0.119648	1.14369	0.00155975	0.0404267
ADGRE1	chr19_6908665	-0.0342771	0.377022	0.000177634	0.00955336
DBT	chr1_100206311	-0.0327556	0.420213	0.000170428	0.00932407
DBT	chr1_100218787	-0.0498919	0.666557	1.427e-05	0.00146874
CORT	chr1_10450241	0.685114	-5.51068	0.000268377	0.0127591
WDR47	chr1_108982800	-0.0445171	0.716976	0.000768181	0.0256531
TMIGD3	chr1_111489033	-0.10355	1.61379	4.09145e-07	9.51538e-05
DDX20	chr1_111760456	-0.0323425	0.695255	0.00125121	0.0349566
DDX20	chr1_111762785	-0.0235546	0.666449	0.000496409	0.0195945
PTPN22	chr1_113857574	-0.156731	1.64168	0.000181319	0.00969099
TTF2	chr1_117090512	-0.150152	1.63599	1.35874e-07	4.28066e-05
TNFRSF18	chr1_1204502	-0.425098	2.51948	0.000358895	0.015754
PRDM2	chr1_13730931	0.0248397	-0.17475	2.43441e-05	0.0021821
POGZ	chr1_151408250	0.0507989	-0.370944	0.000609245	0.0223087
POGZ	chr1_151411577	0.0308836	-0.0610328	0.00181075	0.0441682
GON4L	chr1_155820570	0.0853041	-0.681616	0.00182623	0.0442669
AIM2	chr1_159062697	-0.150165	1.69051	0.00186968	0.0449402
TMCO1	chr1_165743314	0.0451109	0.234581	0.000813321	0.0267123
RABGAP1L	chr1_174219094	-0.0767154	1.10837	0.000916243	0.0289863
LAMC1	chr1_183116729	0.296913	-1.55113	0.000133103	0.00812306
RO60	chr1_193069047	-0.0875974	1.08814	0.00219731	0.0496268
ASPM	chr1_197084432	-0.0497142	0.886316	0.00199896	0.0466802
USP48	chr1_21703628	-0.0359698	0.787511	0.00124142	0.0349348
USP48	chr1_21706893	-0.0382215	0.999411	0.000124361	0.00764377
IARS2	chr1_220096085	-0.0733402	2.2853	0.000752118	0.0254802
IARS2	chr1_220110771	-0.0673615	2.0834	0.000360667	0.015754
RAB3GAP2	chr1_220196404	0.0599029	-0.139298	3.49554e-09	2.48395e-06
TP53BP2	chr1_223796605	0.0542879	0.0199964	0.000581653	0.0216672
LIN9	chr1_226250817	-0.162796	1.67271	0.00188588	0.0452033
ARV1	chr1_230995821	0.170893	-0.662419	2.91202e-05	0.00250579
B3GALNT2	chr1_235470833	-0.0624914	0.641101	0.00177749	0.043701
LGALS8	chr1_236540518	-0.0513161	1.00791	7.87743e-05	0.00533743
ACTN2	chr1_236739233	0.0746365	-1.52885	0.00219602	0.0496268
PHACTR4	chr1_28459219	0.144898	-0.987976	1.44264e-07	4.28066e-05
RNF19B	chr1_32936734	-0.035793	1.38654	0.00112461	0.0331414
IPO13	chr1_43961283	0.0557617	0.403353	1.78668e-06	0.000295661
EIF2B3	chr1_44941510	0.112657	-0.610864	5.25616e-06	0.000685292
EFCAB7	chr1_63532656	-0.0423329	0.297789	0.00107007	0.0324223
CACHD1	chr1_64673105	0.0563482	-0.748708	3.09605e-06	0.000429701
LRRC40	chr1_70189299	-0.019866	0.998078	0.000172287	0.00932407
RERE	chr1_8445685	0.0891639	-0.520603	2.89781e-06	0.000408781
RPF1	chr1_84490479	-0.0499019	1.4963	1.32274e-07	4.28066e-05
COL24A1	chr1_85970275	-0.0585406	0.048971	2.77283e-05	0.00241012
GLMN	chr1_92297535	-0.0274674	0.50655	0.0011776	0.0339959
RPAP2	chr1_92297535	-0.0242668	0.20079	3.08107e-05	0.00262501
POFUT1	chr20_32230695	0.0594188	0.239199	2.34683e-05	0.00214835
C20orf194	chr20_3318235	0.047284	-0.781797	8.71343e-06	0.00102711
BPIFB1	chr20_33305988	1.50232	-6.80468	0.00189616	0.0452231
NCOA6	chr20_34750523	0.0372532	0.067823	0.000220274	0.0110637
PHF20	chr20_35842553	0.097219	-0.580964	1.20453e-07	4.14598e-05
CTNNBL1	chr20_37802801	0.0664122	-0.0811715	1.50037e-08	8.343e-06
RALGAPB	chr20_38517489	0.0346945	0.0451347	6.51813e-05	0.00471332
RALGAPB	chr20_38562749	0.063579	-0.140019	0.00104452	0.0318012
RNF24	chr20_3948198	0.0886654	-0.579895	0.00127154	0.0351821
DNTTIP1	chr20_45800995	0.0613049	0.310749	7.67031e-06	0.00092962
NCOA3	chr20_47637800	0.0515773	-0.154817	2.68867e-06	0.0003856
NCOA3	chr20_47642168	0.130553	-0.899263	2.14634e-09	1.67902e-06
NCOA3	chr20_47653369	0.0316445	0.0302297	3.75262e-09	2.48395e-06
SLC23A2	chr20_4859245	0.027765	-0.227551	0.00019697	0.0101492
SLC9A8	chr20_49878071	0.178308	-2.604	3.46482e-07	8.28189e-05
LTN1	chr21_28966884	0.090069	-0.620835	1.88252e-11	2.31416e-08
BACH1	chr21_29553533	-0.039848	1.00428	0.00160569	0.0408786
CHAF1B	chr21_36415275	-0.0943602	1.4567	0.000113406	0.00711515
PCNT	chr21_46401533	-0.10075	1.32579	0.000405407	0.0171849
CCDC157	chr22_30376240	-0.0230228	-0.100634	0.000221146	0.0110637
RNF215	chr22_30376240	-0.0211094	0.0111576	6.8571e-06	0.00085515
SAMM50	chr22_43972849	-0.0216825	0.894908	0.00135554	0.0368871
TTC38	chr22_46283954	-0.0469191	1.76745	6.68028e-05	0.00479032
POLR1B	chr2_112552621	-0.0760176	1.83953	0.00199827	0.0466802
SLC35F5	chr2_113742700	0.153139	-1.04653	6.72398e-17	2.89299e-13
CFAP221	chr2_119608482	0.1085	-2.07815	0.0020274	0.0470236
CFAP221	chr2_119647054	0.147946	-2.25373	0.000831612	0.0272092
TRIB2	chr2_12718273	-0.364712	5.13387	0.00165634	0.0417006
EPC2	chr2_148769252	0.0408446	-0.0370674	0.00181726	0.0441739
GPD2	chr2_156513507	-0.0342412	1.2226	0.0011405	0.0332679
COBLL1	chr2_164694786	0.131166	-0.831798	0.00016839	0.00932407
SCN9A	chr2_166281811	-0.0881352	0.285279	0.00109048	0.0324413
TTN	chr2_178543037	-0.0385894	-0.182764	0.00088247	0.0282575
HIBCH	chr2_190212936	-0.120273	1.49166	0.000590726	0.0218163
NAB1	chr2_190673068	-0.0349401	1.03213	0.00102727	0.0316834
PGAP1	chr2_196926620	-0.0811162	0.599295	0.00136356	0.0368976
WDR12	chr2_202952535	-0.0544141	0.956361	7.35324e-05	0.0051028
CYP20A1	chr2_203292246	0.0679332	-0.695923	0.000432287	0.0179702
ILKAP	chr2_238173501	0.027136	0.122595	0.000677358	0.023888
NRBP1	chr2_27436955	0.0397904	0.0790769	0.000630241	0.0227866
PLEKHH2	chr2_43700660	0.195008	-2.04507	0.00104587	0.0318012
SRBD1	chr2_45579825	-0.0345596	1.06828	0.00137862	0.0371882
MTIF2	chr2_55263872	-0.0539783	1.33712	0.000883354	0.0282575
UGP2	chr2_63885573	0.0528419	0.172599	1.81942e-08	8.343e-06
C2orf42	chr2_70229321	0.0285477	-0.248369	6.98018e-05	0.00492331
DQX1	chr2_74527692	-0.194543	1.80515	1.64798e-06	0.000278057
CD8B	chr2_86822236	-0.0731933	0.408694	0.00104193	0.0318012
AC079447.1	chr2_99150465	-0.0621638	0.555378	1.00656e-05	0.00111044
AC079447.1	chr2_99171685	-0.15873	1.19529	1.03627e-09	9.9079e-07
AC079447.1	chr2_99319803	-0.0727157	0.464353	4.99818e-06	0.000661682
MYH15	chr3_108456888	-0.119073	0.614721	0.00145543	0.03842
GTPBP8	chr3_113000945	-0.0293415	0.575278	0.00123909	0.0349348
IQCB1	chr3_121807306	-0.0735565	1.21183	0.000492115	0.0195945
KALRN	chr3_124446612	0.35563	-3.10126	0.00143995	0.0382432
UMPS	chr3_124742049	-0.0424171	1.01148	7.45043e-05	0.00512888
ESYT3	chr3_138474184	-0.0541607	0.110275	0.000391577	0.0167638
GFM1	chr3_158690142	-0.0286311	0.963854	0.00175055	0.043162
TRIM59	chr3_160438580	-0.11814	1.07095	0.000941256	0.0296685
NMD3	chr3_161238095	-0.0354841	1.2957	0.000207193	0.0106125
NMD3	chr3_161242681	-0.143643	2.09836	0.000315093	0.0141957
SLITRK3	chr3_165187861	0.360129	-6.00403	0.000209134	0.0106485
TTC14	chr3_180603110	0.0654395	-0.888445	5.74296e-05	0.00422377
THRB	chr3_24228922	0.104204	-1.09436	0.000185045	0.00970919
NGLY1	chr3_25719647	-0.0817092	1.01673	5.2065e-05	0.00396477
TGFBR2	chr3_30650380	0.276786	-1.66735	6.68361e-14	1.43781e-10
SCN11A	chr3_38863337	0.374529	-4.3377	0.00172016	0.0427803
SCN11A	chr3_38896809	0.151135	-2.79741	0.00157198	0.0406214
SLC25A38	chr3_39396212	-0.069622	1.35468	0.000569987	0.0214181
CCDC13	chr3_42758063	-0.0556336	-0.40397	0.00216495	0.0494148
ZNF660	chr3_44580468	-0.153274	0.455355	0.00118126	0.0339959
ZNF197	chr3_44580468	-0.126525	0.896394	2.51386e-05	0.00223008
LARS2	chr3_45458687	-0.057193	0.939136	9.09232e-07	0.000173865
ATRIP	chr3_48449938	-0.0257663	0.640665	1.55359e-08	8.343e-06
CCDC66	chr3_56619255	-0.0972862	0.803729	0.000836658	0.0272165
RPP14	chr3_58310483	-0.0398414	0.187573	0.00170735	0.0425847
ROBO2	chr3_77522652	-0.916525	8.43699	2.11981e-05	0.00200451
RIOX2	chr3_97950910	-0.0967689	1.14	0.000499719	0.0196351
CENPE	chr4_103145020	-0.0559039	0.706241	0.000148743	0.00872424
HADH	chr4_108014613	-0.0361362	1.09314	0.00186607	0.0449402
ETNPPL	chr4_108748164	0.561055	-8.46016	0.000137515	0.00827494
CCNA2	chr4_121817699	-0.274469	3.52327	3.39795e-06	0.000464117
PLK4	chr4_127893271	-0.0438851	0.672998	0.000182465	0.00969203
MFSD8	chr4_127930820	-0.104421	1.30127	0.000152107	0.00884382
OTUD4	chr4_145124972	-0.109959	1.76351	1.60928e-07	4.34944e-05
OTUD4	chr4_145155481	-0.0540179	1.16215	0.00167755	0.0420856
SMAD1	chr4_145554092	-0.0296521	0.603089	1.61746e-07	4.34944e-05
CPE	chr4_165467674	0.125345	-0.960162	0.00165736	0.0417006
NEIL3	chr4_177353766	-0.0469718	0.673046	0.000109955	0.00700862
NCAPG	chr4_17840247	-0.17352	2.12431	2.40289e-07	6.09721e-05
RWDD4	chr4_183646279	-0.0616188	1.21707	0.000889054	0.0283345
FAT1	chr4_186639707	-0.148191	2.43334	0.000628458	0.0227866
ZCCHC4	chr4_25314016	-0.00991647	0.119131	0.00141832	0.0379025
KLHL5	chr4_39075948	0.217344	-2.52317	0.000184588	0.00970919
ATP8A1	chr4_42590919	-0.147625	1.94199	2.58065e-06	0.000376381
ATP8A1	chr4_42624643	-0.0996299	1.31735	0.000522729	0.0202018
NFXL1	chr4_47884305	-0.0876773	1.99198	0.000529563	0.0202528
SPATA18	chr4_52062187	-0.0444116	0.670218	0.000117573	0.00727852
FIP1L1	chr4_53399717	-0.0543819	0.476172	0.000278757	0.0128963
JAKMIP1	chr4_6084968	-0.0824306	1.17616	0.000698916	0.0243177
UBA6	chr4_67681515	-0.135933	1.62653	1.09677e-05	0.00119465
GRSF1	chr4_70827778	-0.0597794	1.54387	2.00458e-08	8.6247e-06
PAQR3	chr4_78926481	-0.0527644	0.931367	0.000480678	0.0193282
SEC31A	chr4_82861615	0.367548	-2.39687	0.00027742	0.0128963
SEC31A	chr4_82863397	0.160812	-0.339106	0.000552553	0.020854
SEC31A	chr4_82864412	0.288961	-1.49019	2.80147e-21	2.41067e-17
COPS4	chr4_83049145	-0.0416445	1.39036	1.00108e-06	0.000187267
TRMT44	chr4_8471059	-0.06261	0.454897	9.92626e-06	0.00111044
SMARCAD1	chr4_94284949	-0.105877	1.62572	0.000102457	0.00657941
RAP1GDS1	chr4_98418644	-0.082593	1.35084	0.000673521	0.0238504
EIF4E	chr4_98881150	-0.0463243	0.641967	0.000724383	0.0248339
WDR36	chr5_111102302	-0.0682829	1.49376	0.000276496	0.0128963
SLC12A2	chr5_128186462	-0.0952456	3.9112	0.000334476	0.0149128
CATSPER3	chr5_134970163	-0.0514289	0.19402	0.000585192	0.0217051
BRD8	chr5_138171174	-0.0800396	1.25663	0.000760513	0.0256531
BRD8	chr5_138171416	-0.0406749	1.02343	1.38001e-05	0.00144817
HARS2	chr5_140696829	-0.0134052	0.720364	0.00109332	0.0324413
PCDHGA1	chr5_141433209	-0.157968	1.72645	0.000986429	0.0306434
PCDHGA2	chr5_141433209	-0.115036	1.02598	0.000700692	0.0243177
PCDHGB2	chr5_141433209	-0.124183	1.24657	0.000967393	0.0301609
PCDHGA5	chr5_141433209	-0.121247	1.0989	0.00185869	0.0449272
PCDHGB3	chr5_141433209	-0.125888	1.19477	0.000945559	0.0296723
PCDHGA6	chr5_141433209	-0.092136	0.771921	0.000462551	0.0188638
TRIO	chr5_14388689	0.023792	-0.138891	0.00150521	0.039131
TRIO	chr5_14390881	0.0884886	-0.711838	3.32624e-05	0.00277886
TRIO	chr5_14485053	0.0277184	-0.0853296	0.00119785	0.0341308
SH3RF2	chr5_146055957	-0.196571	2.23631	0.000460501	0.0188638
RETREG1	chr5_16474671	0.0710859	-0.470778	2.01349e-05	0.00192512
MYO10	chr5_16763617	0.19559	-1.46322	0.000153611	0.0088713
ZNF354A	chr5_178713630	-0.135865	1.49065	7.52059e-07	0.000157841
SLC1A3	chr5_36629700	-0.0872678	0.958545	1.25391e-05	0.00134874
NIPBL	chr5_37051760	0.115923	-1.11997	0.00159886	0.0408786
MTREX	chr5_55307417	-0.0631068	0.832624	0.000708522	0.0243873
DEPDC1B	chr5_60605866	-0.105549	1.49	0.00121984	0.0346427
NLN	chr5_65792661	-0.0981316	1.17836	8.99775e-05	0.00595582
ERBIN	chr5_66076966	0.0844483	-0.446509	0.000477139	0.0193203
CDK7	chr5_69269159	-0.0491879	1.2151	0.00200174	0.0466802
CERT1	chr5_75426481	-0.0583753	0.750179	4.70057e-05	0.00370316
WDR41	chr5_77489582	-0.0315075	1.08445	1.84215e-08	8.343e-06
TTC37	chr5_95507015	0.0690871	-0.0888806	9.75644e-12	1.39924e-08
SEC63	chr6_107921916	0.068319	-0.207483	8.8277e-07	0.000172642
SESN1	chr6_108998765	0.116683	-1.19949	1.00455e-05	0.00111044
FIG4	chr6_109727287	-0.0341084	0.232321	1.51256e-05	0.00153125
LAMA4	chr6_112141263	0.12597	-0.895009	0.00217668	0.0494204
MARCKS	chr6_113860034	0.163624	-0.517272	0.000572743	0.0214281
KPNA5	chr6_116705055	-0.0516058	0.356091	0.00117582	0.0339959
IL20RA	chr6_137004765	-0.108211	1.51854	6.13252e-06	0.000776034
FOXF2	chr6_1394673	0.343655	-4.50735	0.00148159	0.0389353
PDE10A	chr6_165396475	-0.0823987	0.347585	6.04157e-05	0.00440574
RPS6KA2	chr6_166418093	0.0440248	-0.275233	0.000410147	0.0172162
TPMT	chr6_18147925	-0.0971833	2.18577	5.72145e-05	0.00422377
SCGN	chr6_25689151	0.483985	-6.09878	0.000172065	0.00932407
ABCF1	chr6_30578077	0.154787	-0.594047	1.38181e-09	1.18904e-06
PPP1R10	chr6_30605861	0.045212	-0.0668199	4.05755e-05	0.00329389
C6orf136	chr6_30651509	-0.0301397	1.14437	0.00145554	0.03842
AGPAT1	chr6_32179515	0.0626641	-0.0290874	4.98056e-05	0.00386105
RNF5	chr6_32179515	0.070806	0.640533	0.000170613	0.00932407
DST	chr6_56639680	0.15663	-1.65971	1.98159e-05	0.00191591
IMPG1	chr6_76018867	-0.0654533	0.00247606	1.43375e-05	0.00146874
BCKDHB	chr6_80127526	-0.0751969	1.1475	0.000706877	0.0243873
BCKDHB	chr6_80200906	-0.0482349	1.008	3.63349e-05	0.00300637
CYB5R4	chr6_83940496	-0.0725348	0.816925	3.85608e-06	0.000518462
AL049697.1	chr6_87511380	-0.218793	2.22801	2.15025e-05	0.00200578
SLC35A1	chr6_87511380	-0.136141	2.49183	1.0297e-07	3.6919e-05
MMS22L	chr6_97168032	-0.0970749	0.730469	0.000316871	0.0142014
COQ3	chr6_99369824	-0.0619693	1.26698	1.2188e-06	0.000223145
TSTD3	chr6_99558420	-0.0483487	0.32216	0.00077389	0.0256531
CUX1	chr7_102104314	0.048189	-0.0201275	0.000251219	0.0121446
POLR2J	chr7_102473111	0.159904	-1.33634	0.000446373	0.0183782
SLC26A5	chr7_103362795	0.205674	-5.31176	0.00107786	0.0324413
SLC26A4	chr7_107683127	-0.248018	2.69333	4.03509e-05	0.00329389
NRCAM	chr7_108234700	0.146262	-1.52021	0.000545171	0.0206661
ATP6V0A4	chr7_138769148	0.191866	-4.10035	1.66318e-05	0.00166415
NUB1	chr7_151349027	-0.0697443	1.73465	4.23661e-05	0.0034071
VOPP1	chr7_55497555	0.056777	0.0714426	0.000147505	0.00872424
HIP1	chr7_75556687	0.0514902	-0.358818	0.000155817	0.00887953
POR	chr7_75943954	0.155398	-0.626322	0.0005163	0.0201473
ELAPOR2	chr7_86893105	0.10926	-2.00958	4.73385e-05	0.00370316
PON3	chr7_95359944	0.124247	-2.04383	1.85537e-05	0.00183511
SLC25A13	chr7_96146537	0.0728386	-0.148623	1.47783e-08	8.343e-06
SLC25A13	chr7_96189553	0.0404607	0.153221	7.8436e-06	0.000937419
LONRF1	chr8_12740808	-0.0735118	0.806464	0.00076707	0.0256531
ASAP1	chr8_130180908	0.0621269	-0.251532	2.4769e-07	6.09721e-05
SLC7A2	chr8_17548859	0.497437	-4.88902	0.000414683	0.0173221
ESCO2	chr8_27780150	-0.154926	1.74891	0.000192202	0.00996326
INTS9	chr8_28850106	-0.0342169	0.760686	0.000242625	0.0119302
RBPMS	chr8_30547275	0.254997	-3.15404	0.00173806	0.0430176
GSR	chr8_30712093	-0.052842	1.80575	0.000771321	0.0256531
ERLIN2	chr8_37753897	-0.0575598	1.49293	0.000263813	0.0126117
ADAM9	chr8_39082625	-0.0847518	1.91173	1.91301e-05	0.00187062
GOLGA7	chr8_41497463	-0.116388	1.76858	0.00086403	0.0278463
ASPH	chr8_61638366	-0.0439665	1.5424	0.00210812	0.0482478
ASPH	chr8_61644637	-0.184393	2.96871	8.20055e-07	0.000168014
MTFR1	chr8_65724205	-0.153753	2.26893	0.00195365	0.0461172
SGK3	chr8_66847177	-0.0378738	0.358008	0.000366219	0.0158459
CSPP1	chr8_67149948	-0.0110921	-0.0352408	0.001596	0.0408786
IL7	chr8_78717504	-0.0452603	0.690537	1.5823e-07	4.34944e-05
CA13	chr8_85268678	0.0826126	-0.966384	0.000681247	0.0239271
RNF20	chr9_101544707	0.0252722	0.459738	0.000841324	0.0272165
GPR21	chr9_123029318	0.260138	-3.85137	0.000366453	0.0158459
SCAI	chr9_125003575	-0.0411566	0.476197	0.00209395	0.0481777
SNAPC3	chr9_15458083	-0.0571549	1.19347	0.00119299	0.0341308
CCDC171	chr9_15727846	-0.101256	1.35117	0.000491907	0.0195945
MTAP	chr9_21861904	-0.0912284	1.00197	2.34763e-06	0.00035441
DMRTA1	chr9_22451040	0.362939	-3.93911	0.00195902	0.0461172
VCP	chr9_35059650	0.134655	0.00782968	0.000641778	0.0230104
RECK	chr9_36109843	0.0470083	-0.629971	0.000189167	0.00986537

## Sheet: UCEC
gene	str_id	coef	intercept	p_value	adj_p
NRAP	chr10_113620721	0.289041	-5.81318	1.02349e-05	0.00479163
PRTFDC1	chr10_24851485	0.201163	-1.72058	1.88851e-05	0.00743987
TFAM	chr10_58388810	0.155798	-1.08251	3.70525e-11	8.9667e-08
PALD1	chr10_70529209	0.0704217	-0.514566	3.04921e-07	0.000303844
RNLS	chr10_88274911	0.220694	-2.61302	2.47227e-06	0.00174501
LIPJ	chr10_88602551	0.341942	-6.04017	4.4699e-06	0.00270429
TNKS2	chr10_91842189	0.0981026	-0.22725	0.000278594	0.0462684
CEP164	chr11_117351932	0.0993476	-0.977499	3.00626e-07	0.000303844
CEP164	chr11_117390637	0.0601932	-1.24645	5.7119e-05	0.0156466
TRAPPC4	chr11_119018676	0.0510507	-0.0450174	2.46037e-13	1.38929e-09
MRE11	chr11_94479765	0.0709954	-0.666548	4.91582e-05	0.0148594
UHRF1BP1L	chr12_100102701	-0.0269193	0.45215	8.84765e-05	0.0214113
TESPA1	chr12_54961093	-0.115358	0.871767	5.38595e-05	0.0154641
MARK3	chr14_103498471	0.0258197	-0.243098	1.32859e-05	0.00562659
AL139353.1	chr14_31350761	-0.220527	0.885553	0.000143651	0.0300426
TTC6	chr14_37792253	0.762095	-7.77051	0.000220098	0.0418928
COX16	chr14_70326299	-0.0467565	1.03158	8.61542e-05	0.0211515
RIOX1	chr14_73493000	0.0311651	-0.460818	0.000243027	0.0431358
GTF2A1	chr14_81180403	0.128955	-1.32085	0.000248478	0.043394
GALC	chr14_87988526	0.249087	-2.23172	0.000301494	0.0488357
NEO1	chr15_73126401	0.112426	-0.787817	0.000102014	0.0236064
NEO1	chr15_73135864	0.104319	-1.20524	1.04658e-05	0.00479163
IREB2	chr15_78498394	-0.0822311	0.97215	0.000155759	0.0321776
FAHD1	chr16_1837877	-0.114142	1.65988	7.83317e-19	1.32694e-14
SDF2	chr17_28661084	0.0267521	0.454922	0.000204371	0.0402563
NSF	chr17_46755723	-0.0407347	1.2794	5.04335e-06	0.00284781
ZFP3	chr17_5093176	0.0990073	-1.871	9.25197e-06	0.00460966
LMAN1	chr18_59345962	0.145543	-0.189803	9.56282e-07	0.000771401
SPC24	chr19_11147909	0.0182904	0.328837	0.000232194	0.0422943
GPATCH1	chr19_33129950	0.0325914	-0.543611	3.46543e-05	0.0117409
UBA2	chr19_34454427	0.0748887	0.0502204	7.34902e-10	1.38325e-06
UBA2	chr19_34460452	0.0387327	0.42854	1.20976e-05	0.00525471
ALDH9A1	chr1_165665136	-0.140333	2.73519	2.38527e-05	0.00878403
ZBTB41	chr1_197181120	-0.0860777	1.51325	0.000187077	0.0372834
IARS2	chr1_220096085	-0.0642807	1.90158	4.23636e-05	0.0132896
IARS2	chr1_220110771	-0.0682318	1.88944	2.13404e-05	0.00821605
KCNK1	chr1_233671922	-0.177571	2.61418	0.000228616	0.0420952
ZMYM4	chr1_35419437	0.0451692	-0.253704	0.000244453	0.0431358
TLCD4	chr1_95150193	-0.0496295	0.707129	0.000239011	0.0430729
PSMF1	chr20_1146291	0.0348402	0.289578	2.2867e-05	0.00860817
NINL	chr20_25452812	0.0511179	-0.486928	3.4005e-05	0.0117409
CDK5RAP1	chr20_33367014	0.0432618	-0.223456	3.76232e-05	0.0124968
RALGAPB	chr20_38517489	0.0342579	-0.139562	2.45394e-06	0.00174501
RALGAPB	chr20_38562749	0.0575083	-0.352027	2.90043e-07	0.000303844
TFAP2C	chr20_56638265	0.210464	-1.9542	0.000225478	0.0420952
ATP5F1E	chr20_59028741	0.0992006	0.391105	9.12042e-05	0.0217606
ATP5F1E	chr20_59036774	0.0549167	0.795552	0.000316239	0.0496026
LTN1	chr21_28966884	0.0652915	-0.740798	1.54807e-08	2.38403e-05
HMGN1	chr21_39345111	-0.0106457	1.37047	9.52521e-07	0.000771401
TAFA5	chr22_48750155	0.945974	-5.72456	8.23076e-05	0.0208103
RAB3GAP1	chr2_135129945	0.0325435	0.220122	5.56864e-05	0.0156466
DYNC1I2	chr2_171690252	0.178709	-0.962758	0.000172154	0.0351359
SPAG16	chr2_213930215	0.137696	-1.75358	8.4371e-06	0.0044391
THADA	chr2_43566825	0.0446452	-0.633026	8.3664e-05	0.0208422
PPM1B	chr2_44209432	0.218469	-2.52503	0.000273552	0.0462684
MSH6	chr2_47805602	0.0371553	-0.183279	4.96078e-06	0.00284781
MEIS1	chr2_66568967	0.16555	-0.760099	2.80125e-05	0.0100964
TXNDC9	chr2_99319803	0.051636	-0.266386	2.64937e-11	8.9667e-08
SENP7	chr3_101459058	0.0580548	-0.459894	0.000308466	0.0488357
MBD4	chr3_129436701	0.17465	-1.81198	0.00027648	0.0462684
IFT122	chr3_129450012	0.0459701	-0.285411	1.91029e-07	0.000231145
PRKCI	chr3_170275188	0.069617	-0.600873	3.97689e-05	0.012711
FXR1	chr3_180961448	0.0677604	-0.280032	2.30751e-06	0.00174501
FXR1	chr3_180975428	0.0469761	-0.0406371	8.64759e-06	0.0044391
RFC4	chr3_186804505	0.0664285	-0.388947	6.00428e-05	0.015916
THRB	chr3_24228922	0.186562	-2.48364	1.1875e-05	0.00525471
MLH1	chr3_36990443	0.104511	-1.64782	0.000268828	0.0462684
ANO10	chr3_43605721	0.191043	-1.09536	9.74415e-06	0.00471617
ZKSCAN7	chr3_44565329	0.141149	-1.75483	6.01312e-05	0.015916
RBM6	chr3_50061561	0.0383235	-0.00194413	4.48391e-07	0.000421986
MTMR14	chr3_9688839	0.0416476	-0.290874	1.56258e-05	0.00645613
BRPF1	chr3_9747874	0.0499778	-0.554785	7.52512e-05	0.0193145
CAMK2D	chr4_113661778	-0.0926901	1.25645	0.000214361	0.0412646
AGA	chr4_177436361	0.0899432	-0.348182	6.78086e-05	0.017672
PDS5A	chr4_39926867	-0.0423533	1.05088	0.000277342	0.0462684
UCHL1	chr4_41261702	0.234317	-1.43033	5.72661e-05	0.0156466
SEC31A	chr4_82864412	0.223511	-1.02236	3.37893e-15	2.86196e-11
PDLIM5	chr4_94586958	-0.0332789	1.11811	0.000209633	0.0408182
PRRC1	chr5_127530428	-0.0500187	0.853711	4.9999e-05	0.0148594
PRELID2	chr5_145822996	-0.127599	0.762812	3.48016e-09	5.8954e-06
TAF9	chr5_69371437	-0.082691	1.82097	5.18683e-08	6.75883e-05
ANKRD31	chr5_75210874	0.766532	-8.70858	7.4758e-07	0.000666527
TTC37	chr5_95507015	0.0933345	-0.700488	3.66335e-10	7.75714e-07
ERAP1	chr5_96783818	0.026272	-0.159687	0.000304428	0.0488357
ERAP2	chr5_96895155	-0.171812	2.39477	1.54704e-12	6.55171e-09
HDAC2	chr6_113970938	-0.224275	3.08513	0.000139977	0.0296401
NT5DC1	chr6_116106344	-0.0429409	0.866836	4.11376e-06	0.002581
ABCF1	chr6_30578077	0.199986	-0.966918	3.40745e-11	8.9667e-08
KLC4	chr6_43054239	0.0540981	-0.387859	0.000306932	0.0488357
SMAP1	chr6_70798667	0.116544	-1.48342	5.26425e-05	0.0153752
RELN	chr7_103478277	0.19738	-5.13642	0.000132293	0.0291281
ATXN7L1	chr7_105875628	0.0658957	-0.592125	0.000136969	0.0293704
WIPI2	chr7_5199689	0.0364268	0.191245	0.0001324	0.0291281
VOPP1	chr7_55497555	0.047076	0.0361219	0.000106707	0.0241016
CASD1	chr7_94528274	-0.0566549	1.34825	0.000103121	0.0236064
NPTX2	chr7_98629437	0.188603	-2.95674	0.000227345	0.0420952
EXT1	chr8_117799568	0.0845546	-0.377425	3.91912e-06	0.00255346
NTAQ1	chr8_123436665	0.0287355	-0.339045	0.000134992	0.0293175
KIF13B	chr8_29204771	-0.12424	1.66143	3.06722e-05	0.0108247
ADAM32	chr8_39118062	0.0484107	-1.01153	0.000184946	0.0372834
PRKDC	chr8_47954350	0.276667	-2.14832	4.34388e-08	6.13211e-05
ASPH	chr8_61579910	-0.0484769	1.29645	0.000294152	0.0483781
ASPH	chr8_61583863	-0.0476948	0.912152	9.54305e-05	0.0224527
LAPTM4B	chr8_97805325	0.0595486	0.89203	1.65621e-05	0.00668006
SHOC1	chr9_111758199	0.461179	-5.5929	3.88729e-05	0.0126636
DCAF10	chr9_37819179	-0.0548796	0.778358	2.81975e-06	0.00191066
FAM120AOS	chr9_93447701	-0.0606139	1.22422	4.7033e-05	0.0144862
FAM120A	chr9_93447701	-0.0676707	2.12645	7.90396e-06	0.00431913
