# Supplementary material for: Multicancer analyses of short tandem repeat variations reveal shared gene regulatory mechanisms
Source: Research Square preprint supplement (doi:10.21203/rs.3.rs-5775561/v1), 2025-01-09
Supplement: Supplementary file 3 [file additional_file_3.xlsx]

## Sheet: CRC
Category	Term	Count	%	PValue	Genes	List Total	Pop Hits	Pop Total	Fold Enrichment	Bonferroni	Benjamini	FDR
GOTERM_CC_DIRECT	GO:0005829~cytosol	465	41.6667	2.07e-32	ENSG00000069974, ENSG00000137628, ENSG00000009307, ENSG00000150961, ENSG00000123349, ENSG00000168014, ENSG00000101558, ENSG00000128915, ENSG00000090686, ENSG00000156261, ENSG00000107099, ENSG00000122257, ENSG00000094804, ENSG00000115946, ENSG00000111229, ENSG00000134242, ENSG00000137992, ENSG00000067208, ENSG00000133392, ENSG00000169598, ENSG00000124207, ENSG00000005175, ENSG00000182670, ENSG0000…	1072	5649	20887	1.60385	1.6e-29	1.6e-29	1.54e-29
UP_KW_PTM	KW-0597~Phosphoprotein	671	60.1254	4.96e-26	ENSG00000070961, ENSG00000143190, ENSG00000064042, ENSG00000069974, ENSG00000009307, ENSG00000197930, ENSG00000114861, ENSG00000150961, ENSG00000172869, ENSG00000189079, ENSG00000170448, ENSG00000123349, ENSG00000168014, ENSG00000101558, ENSG00000128915, ENSG00000090686, ENSG00000183530, ENSG00000156261, ENSG00000107099, ENSG00000100342, ENSG00000122257, ENSG00000094804, ENSG00000180263, ENSG0000…	891	8417	14252	1.27516	1.14e-24	1.19e-24	1.19e-24
GOTERM_MF_DIRECT	GO:0005515~protein binding	830	74.3728	7.87e-19	ENSG00000178177, ENSG00000137628, ENSG00000009307, ENSG00000197930, ENSG00000112562, ENSG00000189079, ENSG00000157470, ENSG00000128915, ENSG00000145495, ENSG00000090686, ENSG00000100342, ENSG00000094804, ENSG00000111229, ENSG00000138964, ENSG00000171792, ENSG00000067208, ENSG00000005175, ENSG00000182670, ENSG00000149600, ENSG00000144395, ENSG00000102753, ENSG00000183520, ENSG00000078328, ENSG0000…	1064	12754	19304	1.18069	9.45e-16	9.45e-16	9.38e-16
GOTERM_CC_DIRECT	GO:0005654~nucleoplasm	322	28.853	2.16e-18	ENSG00000174371, ENSG00000070961, ENSG00000143190, ENSG00000198464, ENSG00000197498, ENSG00000133704, ENSG00000151014, ENSG00000114861, ENSG00000155975, ENSG00000189079, ENSG00000167721, ENSG00000163002, ENSG00000128915, ENSG00000090686, ENSG00000140009, ENSG00000156261, ENSG00000276043, ENSG00000106560, ENSG00000094804, ENSG00000115946, ENSG00000099810, ENSG00000005059, ENSG00000171792, ENSG0000…	1072	4030	20887	1.5568	1.67e-15	8.33e-16	8.02e-16
GOTERM_CC_DIRECT	GO:0005737~cytoplasm	405	36.2903	6.97e-14	ENSG00000064042, ENSG00000137628, ENSG00000123349, ENSG00000108187, ENSG00000156261, ENSG00000107099, ENSG00000214595, ENSG00000094804, ENSG00000180263, ENSG00000111229, ENSG00000138964, ENSG00000134242, ENSG00000137992, ENSG00000133392, ENSG00000169598, ENSG00000124207, ENSG00000014914, ENSG00000182670, ENSG00000100697, ENSG00000102753, ENSG00000183520, ENSG00000078328, ENSG00000100330, ENSG0000…	1072	5754	20887	1.37141	5.37e-11	1.79e-11	1.72e-11
UP_KW_PTM	KW-0007~Acetylation	316	28.3154	8.25e-14	ENSG00000175582, ENSG00000127022, ENSG00000174371, ENSG00000070961, ENSG00000069974, ENSG00000009307, ENSG00000138279, ENSG00000189079, ENSG00000184182, ENSG00000123349, ENSG00000136098, ENSG00000065809, ENSG00000101558, ENSG00000145495, ENSG00000090686, ENSG00000156261, ENSG00000276043, ENSG00000122257, ENSG00000115946, ENSG00000111229, ENSG00000099810, ENSG00000138964, ENSG00000152219, ENSG0000…	891	3511	14252	1.43964	1.9e-12	9.9e-13	9.9e-13
UP_SEQ_FEATURE	COMPBIAS:Polar residues	471	42.2043	1.79e-12	ENSG00000070961, ENSG00000143190, ENSG00000064042, ENSG00000178177, ENSG00000009307, ENSG00000114861, ENSG00000150961, ENSG00000112562, ENSG00000172869, ENSG00000189079, ENSG00000170448, ENSG00000168014, ENSG00000128915, ENSG00000090686, ENSG00000183530, ENSG00000122257, ENSG00000094804, ENSG00000180263, ENSG00000171792, ENSG00000136542, ENSG00000115942, ENSG00000137871, ENSG00000067208, ENSG0000…	1080	6911	20569	1.29798	9.97e-09	9.98e-09	9.93e-09
GOTERM_CC_DIRECT	GO:0005813~centrosome	79	7.07885	1.06e-11	ENSG00000134318, ENSG00000149292, ENSG00000040275, ENSG00000115514, ENSG00000129084, ENSG00000114107, ENSG00000111554, ENSG00000154645, ENSG00000119685, ENSG00000155975, ENSG00000115355, ENSG00000101639, ENSG00000158161, ENSG00000168014, ENSG00000170927, ENSG00000186166, ENSG00000156261, ENSG00000164934, ENSG00000058404, ENSG00000124198, ENSG00000122257, ENSG00000143476, ENSG00000196072, ENSG0000…	1072	671	20887	2.29396	8.13e-09	2.03e-09	1.96e-09
UP_SEQ_FEATURE	COMPBIAS:Basic and acidic residues	388	34.767	4.46e-10	ENSG00000070961, ENSG00000064042, ENSG00000178177, ENSG00000005189, ENSG00000114861, ENSG00000150961, ENSG00000112562, ENSG00000170448, ENSG00000168014, ENSG00000128915, ENSG00000090686, ENSG00000183530, ENSG00000122257, ENSG00000094804, ENSG00000180263, ENSG00000138964, ENSG00000137871, ENSG00000067208, ENSG00000009413, ENSG00000133392, ENSG00000182670, ENSG00000128923, ENSG00000182552, ENSG0000…	1080	5658	20569	1.30605	2.49e-06	1.24e-06	1.24e-06
GOTERM_MF_DIRECT	GO:0003723~RNA binding	133	11.9176	5.78e-09	ENSG00000127022, ENSG00000055609, ENSG00000197498, ENSG00000009307, ENSG00000005189, ENSG00000197535, ENSG00000083635, ENSG00000138279, ENSG00000172239, ENSG00000004534, ENSG00000167721, ENSG00000101158, ENSG00000122257, ENSG00000108588, ENSG00000131018, ENSG00000115946, ENSG00000151247, ENSG00000096384, ENSG00000156414, ENSG00000115421, ENSG00000143742, ENSG00000113360, ENSG00000100697, ENSG0000…	1064	1455	19304	1.65842	6.94e-06	3.47e-06	3.44e-06
UP_SEQ_FEATURE	CROSSLNK:Glycyl lysine isopeptide (Lys-Gly) (interchain with G-Cter in SUMO2)	114	10.2151	2.49e-08	ENSG00000198464, ENSG00000178177, ENSG00000009307, ENSG00000171940, ENSG00000114861, ENSG00000078043, ENSG00000004534, ENSG00000189079, ENSG00000257923, ENSG00000156261, ENSG00000276043, ENSG00000122257, ENSG00000106443, ENSG00000030419, ENSG00000111229, ENSG00000165392, ENSG00000152219, ENSG00000137871, ENSG00000158710, ENSG00000176208, ENSG00000133794, ENSG00000102908, ENSG00000085415, ENSG0000…	1080	1277	20569	1.70021	0.000139233	4.64e-05	4.62e-05
GOTERM_CC_DIRECT	GO:0005634~nucleus	398	35.6631	3.57e-08	ENSG00000143190, ENSG00000178177, ENSG00000005189, ENSG00000114861, ENSG00000170448, ENSG00000123349, ENSG00000090686, ENSG00000122257, ENSG00000094804, ENSG00000111229, ENSG00000171792, ENSG00000115942, ENSG00000134242, ENSG00000113522, ENSG00000137871, ENSG00000067208, ENSG00000009413, ENSG00000169598, ENSG00000124207, ENSG00000182670, ENSG00000100697, ENSG00000102753, ENSG00000078328, ENSG0000…	1072	6175	20887	1.25582	2.75e-05	5.49e-06	5.28e-06
GOTERM_CC_DIRECT	GO:0005694~chromosome	36	3.22581	9.88e-08	ENSG00000080608, ENSG00000108469, ENSG00000197299, ENSG00000163938, ENSG00000197498, ENSG00000171320, ENSG00000197312, ENSG00000138778, ENSG00000120699, ENSG00000151725, ENSG00000083642, ENSG00000101457, ENSG00000187555, ENSG00000122257, ENSG00000106443, ENSG00000109674, ENSG00000143476, ENSG00000164754, ENSG00000153046, ENSG00000135913, ENSG00000171792, ENSG00000165392, ENSG00000139233, ENSG0000…	1072	254	20887	2.76153	7.61e-05	1.27e-05	1.22e-05
UP_SEQ_FEATURE	REGION:Disordered	797	71.4158	1.71e-07	ENSG00000178177, ENSG00000009307, ENSG00000005189, ENSG00000112562, ENSG00000170448, ENSG00000172869, ENSG00000189079, ENSG00000128915, ENSG00000145495, ENSG00000090686, ENSG00000183530, ENSG00000214595, ENSG00000100342, ENSG00000094804, ENSG00000180263, ENSG00000138964, ENSG00000136542, ENSG00000171792, ENSG00000137871, ENSG00000067208, ENSG00000014914, ENSG00000005175, ENSG00000182670, ENSG0000…	1080	13727	20569	1.10579	0.000953428	0.000238471	0.000237404
GOTERM_MF_DIRECT	GO:0005524~ATP binding	133	11.9176	1.72e-07	ENSG00000070961, ENSG00000108469, ENSG00000006837, ENSG00000137628, ENSG00000136816, ENSG00000197653, ENSG00000151413, ENSG00000197535, ENSG00000184182, ENSG00000159131, ENSG00000136098, ENSG00000100504, ENSG00000021826, ENSG00000136492, ENSG00000054523, ENSG00000156261, ENSG00000086232, ENSG00000142149, ENSG00000094804, ENSG00000165304, ENSG00000185418, ENSG00000183914, ENSG00000165392, ENSG0000…	1064	1541	19304	1.56587	0.000206203	6.87e-05	6.82e-05
UP_SEQ_FEATURE	REPEAT:TPR 3	25	2.24014	6.06e-07	ENSG00000136319, ENSG00000198363, ENSG00000149292, ENSG00000075234, ENSG00000197653, ENSG00000113312, ENSG00000157796, ENSG00000130177, ENSG00000197969, ENSG00000125247, ENSG00000126214, ENSG00000183914, ENSG00000133858, ENSG00000111300, ENSG00000198677, ENSG00000196510, ENSG00000253729, ENSG00000143643, ENSG00000115183, ENSG00000005175, ENSG00000182670, ENSG00000018699, ENSG00000164169, ENSG0000…	1080	146	20569	3.26119	0.00337733	0.000676609	0.000673581
GOTERM_MF_DIRECT	GO:0016887~ATP hydrolysis activity	51	4.56989	6.43e-07	ENSG00000070961, ENSG00000108469, ENSG00000047188, ENSG00000112249, ENSG00000197299, ENSG00000137628, ENSG00000001626, ENSG00000118193, ENSG00000136816, ENSG00000197653, ENSG00000118997, ENSG00000186283, ENSG00000136492, ENSG00000054523, ENSG00000156261, ENSG00000101596, ENSG00000094804, ENSG00000133119, ENSG00000135537, ENSG00000183914, ENSG00000132141, ENSG00000165392, ENSG00000113522, ENSG0000…	1064	434	19304	2.13199	0.000772109	0.000193102	0.000191655
GOTERM_MF_DIRECT	GO:0031267~small GTPase binding	39	3.49462	8.94e-07	ENSG00000065150, ENSG00000134318, ENSG00000124571, ENSG00000131504, ENSG00000135905, ENSG00000152061, ENSG00000273749, ENSG00000133704, ENSG00000197535, ENSG00000119487, ENSG00000116641, ENSG00000158987, ENSG00000118873, ENSG00000254999, ENSG00000166398, ENSG00000147894, ENSG00000184445, ENSG00000128512, ENSG00000147459, ENSG00000141258, ENSG00000107036, ENSG00000085382, ENSG00000100150, ENSG0000…	1064	294	19304	2.40671	0.00107302	0.000214718	0.000213109
GOTERM_CC_DIRECT	GO:0016020~membrane	327	29.3011	9.17e-07	ENSG00000175582, ENSG00000127022, ENSG00000151012, ENSG00000070961, ENSG00000069974, ENSG00000006715, ENSG00000197930, ENSG00000153317, ENSG00000151135, ENSG00000138279, ENSG00000170448, ENSG00000145495, ENSG00000106560, ENSG00000107099, ENSG00000100342, ENSG00000184988, ENSG00000165304, ENSG00000111229, ENSG00000005059, ENSG00000115942, ENSG00000171310, ENSG00000113522, ENSG00000179954, ENSG0000…	1072	5048	20887	1.26215	0.000705544	0.000100827	9.7e-05
UP_SEQ_FEATURE	REPEAT:TPR 1	26	2.32975	9.46e-07	ENSG00000136319, ENSG00000198363, ENSG00000149292, ENSG00000075234, ENSG00000197653, ENSG00000113312, ENSG00000157796, ENSG00000130177, ENSG00000197969, ENSG00000125247, ENSG00000126214, ENSG00000183914, ENSG00000133858, ENSG00000111300, ENSG00000198677, ENSG00000196510, ENSG00000253729, ENSG00000116698, ENSG00000143643, ENSG00000115183, ENSG00000005175, ENSG00000182670, ENSG00000018699, ENSG0000…	1080	160	20569	3.09487	0.00527269	0.000755234	0.000751854
UP_SEQ_FEATURE	REPEAT:TPR 2	26	2.32975	9.46e-07	ENSG00000136319, ENSG00000198363, ENSG00000149292, ENSG00000075234, ENSG00000197653, ENSG00000113312, ENSG00000157796, ENSG00000130177, ENSG00000197969, ENSG00000125247, ENSG00000126214, ENSG00000183914, ENSG00000133858, ENSG00000111300, ENSG00000198677, ENSG00000196510, ENSG00000253729, ENSG00000116698, ENSG00000143643, ENSG00000115183, ENSG00000005175, ENSG00000182670, ENSG00000018699, ENSG0000…	1080	160	20569	3.09487	0.00527269	0.000755234	0.000751854
GOTERM_BP_DIRECT	GO:0051301~cell division	44	3.94265	2.19e-06	ENSG00000108469, ENSG00000040275, ENSG00000118193, ENSG00000137601, ENSG00000138778, ENSG00000157456, ENSG00000196504, ENSG00000130177, ENSG00000149639, ENSG00000120539, ENSG00000136098, ENSG00000119969, ENSG00000083642, ENSG00000184445, ENSG00000094804, ENSG00000164754, ENSG00000135913, ENSG00000196074, ENSG00000135537, ENSG00000174442, ENSG00000109805, ENSG00000065243, ENSG00000173273, ENSG0000…	1030	385	19734	2.18963	0.00832117	0.00835379	0.00834285
UP_SEQ_FEATURE	REPEAT:TPR 4	19	1.70251	4.69e-06	ENSG00000136319, ENSG00000198363, ENSG00000183914, ENSG00000133858, ENSG00000197653, ENSG00000111300, ENSG00000198677, ENSG00000196510, ENSG00000157796, ENSG00000130177, ENSG00000143643, ENSG00000197969, ENSG00000005175, ENSG00000182670, ENSG00000125247, ENSG00000018699, ENSG00000104450, ENSG00000126214, ENSG00000164941	1080	101	20569	3.58279	0.0258538	0.00327423	0.00325958
GOTERM_MF_DIRECT	GO:0004386~helicase activity	17	1.5233	6.14e-06	ENSG00000108469, ENSG00000047188, ENSG00000197275, ENSG00000112249, ENSG00000197299, ENSG00000137628, ENSG00000153922, ENSG00000116830, ENSG00000156414, ENSG00000225830, ENSG00000088205, ENSG00000119969, ENSG00000051341, ENSG00000100697, ENSG00000166508, ENSG00000146414, ENSG00000107201	1064	80	19304	3.85536	0.00735034	0.00122958	0.00122036
GOTERM_CC_DIRECT	GO:0005794~Golgi apparatus	91	8.15412	7.35e-06	ENSG00000107611, ENSG00000175582, ENSG00000006715, ENSG00000069974, ENSG00000152061, ENSG00000009307, ENSG00000132330, ENSG00000137145, ENSG00000154447, ENSG00000111670, ENSG00000118276, ENSG00000119487, ENSG00000115355, ENSG00000115234, ENSG00000197969, ENSG00000143952, ENSG00000119844, ENSG00000119723, ENSG00000141252, ENSG00000257923, ENSG00000170927, ENSG00000109472, ENSG00000128512, ENSG0000…	1072	1100	20887	1.61187	0.00564147	0.000602336	0.000579651
GOTERM_CC_DIRECT	GO:0070062~extracellular exosome	162	14.5161	7.72e-06	ENSG00000127022, ENSG00000175582, ENSG00000124151, ENSG00000070961, ENSG00000148484, ENSG00000069974, ENSG00000105514, ENSG00000136816, ENSG00000005189, ENSG00000197535, ENSG00000138279, ENSG00000080371, ENSG00000119888, ENSG00000159131, ENSG00000143878, ENSG00000153707, ENSG00000162390, ENSG00000100504, ENSG00000108187, ENSG00000156261, ENSG00000214078, ENSG00000168899, ENSG00000100170, ENSG0000…	1072	2258	20887	1.39789	0.00593021	0.000602336	0.000579651
GOTERM_CC_DIRECT	GO:0030027~lamellipodium	27	2.41935	7.82e-06	ENSG00000099204, ENSG00000273749, ENSG00000173482, ENSG00000197635, ENSG00000154447, ENSG00000115355, ENSG00000254999, ENSG00000143776, ENSG00000205726, ENSG00000103313, ENSG00000163466, ENSG00000070756, ENSG00000145555, ENSG00000146192, ENSG00000065243, ENSG00000064012, ENSG00000180263, ENSG00000111229, ENSG00000077420, ENSG00000137312, ENSG00000151422, ENSG00000079691, ENSG00000139132, ENSG0000…	1072	195	20887	2.6978	0.00600528	0.000602336	0.000579651
UP_SEQ_FEATURE	REPEAT:WD 1	34	3.04659	9.75e-06	ENSG00000157954, ENSG00000049167, ENSG00000110107, ENSG00000151779, ENSG00000005448, ENSG00000157796, ENSG00000138674, ENSG00000159259, ENSG00000164253, ENSG00000122218, ENSG00000172869, ENSG00000060688, ENSG00000165521, ENSG00000144426, ENSG00000106263, ENSG00000163625, ENSG00000164934, ENSG00000166359, ENSG00000214595, ENSG00000143476, ENSG00000107036, ENSG00000071127, ENSG00000196792, ENSG0000…	1080	277	20569	2.3377	0.0530134	0.005447	0.00542263
UP_SEQ_FEATURE	REPEAT:WD 2	34	3.04659	9.75e-06	ENSG00000157954, ENSG00000049167, ENSG00000110107, ENSG00000151779, ENSG00000005448, ENSG00000157796, ENSG00000138674, ENSG00000159259, ENSG00000164253, ENSG00000122218, ENSG00000172869, ENSG00000060688, ENSG00000165521, ENSG00000144426, ENSG00000106263, ENSG00000163625, ENSG00000164934, ENSG00000166359, ENSG00000214595, ENSG00000143476, ENSG00000107036, ENSG00000071127, ENSG00000196792, ENSG0000…	1080	277	20569	2.3377	0.0530134	0.005447	0.00542263
UP_KW_PTM	KW-0832~Ubl conjugation	218	19.5341	2.02e-05	ENSG00000127022, ENSG00000151012, ENSG00000198464, ENSG00000178177, ENSG00000009307, ENSG00000114861, ENSG00000004534, ENSG00000189079, ENSG00000145495, ENSG00000156261, ENSG00000276043, ENSG00000122257, ENSG00000106443, ENSG00000094804, ENSG00000111229, ENSG00000171792, ENSG00000152219, ENSG00000137871, ENSG00000067208, ENSG00000176208, ENSG00000085415, ENSG00000058056, ENSG00000138160, ENSG0000…	891	2701	14252	1.29101	0.000464044	0.000161442	0.000161442
GOTERM_MF_DIRECT	GO:0005096~GTPase activator activity	35	3.1362	2.03e-05	ENSG00000112305, ENSG00000152061, ENSG00000170471, ENSG00000047365, ENSG00000153317, ENSG00000134215, ENSG00000024526, ENSG00000198826, ENSG00000137962, ENSG00000118873, ENSG00000196935, ENSG00000204634, ENSG00000088756, ENSG00000128512, ENSG00000071205, ENSG00000147459, ENSG00000141258, ENSG00000106069, ENSG00000108239, ENSG00000100150, ENSG00000107863, ENSG00000149182, ENSG00000065882, ENSG0000…	1064	286	19304	2.22028	0.0241055	0.00348579	0.00345967
GOTERM_CC_DIRECT	GO:0005874~microtubule	36	3.22581	3.13e-05	ENSG00000129422, ENSG00000075711, ENSG00000135624, ENSG00000285053, ENSG00000118193, ENSG00000197653, ENSG00000138778, ENSG00000175203, ENSG00000111554, ENSG00000119685, ENSG00000165521, ENSG00000149639, ENSG00000118997, ENSG00000138095, ENSG00000054523, ENSG00000156261, ENSG00000103313, ENSG00000214595, ENSG00000126214, ENSG00000120694, ENSG00000183914, ENSG00000156299, ENSG00000104218, ENSG0000…	1072	326	20887	2.15162	0.0238164	0.00219129	0.00210876
UP_SEQ_FEATURE	DOMAIN:Helicase C-terminal	18	1.6129	5.81e-05	ENSG00000108469, ENSG00000047188, ENSG00000197275, ENSG00000135829, ENSG00000112249, ENSG00000197299, ENSG00000137628, ENSG00000165392, ENSG00000153922, ENSG00000116830, ENSG00000156414, ENSG00000225830, ENSG00000088205, ENSG00000119969, ENSG00000051341, ENSG00000100697, ENSG00000146414, ENSG00000107201	1080	110	20569	3.11652	0.276959	0.02948	0.0293481
UP_SEQ_FEATURE	REPEAT:WD 4	31	2.77778	7.32e-05	ENSG00000157954, ENSG00000049167, ENSG00000110107, ENSG00000005448, ENSG00000157796, ENSG00000138674, ENSG00000159259, ENSG00000164253, ENSG00000122218, ENSG00000172869, ENSG00000060688, ENSG00000165521, ENSG00000106263, ENSG00000163625, ENSG00000164934, ENSG00000166359, ENSG00000214595, ENSG00000143476, ENSG00000071127, ENSG00000196792, ENSG00000198554, ENSG00000135473, ENSG00000077380, ENSG0000…	1080	267	20569	2.21126	0.335767	0.0340839	0.0339314
UP_SEQ_FEATURE	REPEAT:WD 3	31	2.77778	8.4e-05	ENSG00000157954, ENSG00000049167, ENSG00000110107, ENSG00000005448, ENSG00000157796, ENSG00000138674, ENSG00000159259, ENSG00000164253, ENSG00000122218, ENSG00000172869, ENSG00000060688, ENSG00000165521, ENSG00000106263, ENSG00000163625, ENSG00000164934, ENSG00000166359, ENSG00000214595, ENSG00000143476, ENSG00000071127, ENSG00000196792, ENSG00000198554, ENSG00000135473, ENSG00000077380, ENSG0000…	1080	269	20569	2.19482	0.374356	0.0340839	0.0339314
UP_SEQ_FEATURE	REPEAT:TPR 5	15	1.34409	8.54e-05	ENSG00000136319, ENSG00000183914, ENSG00000133858, ENSG00000197653, ENSG00000198677, ENSG00000196510, ENSG00000157796, ENSG00000130177, ENSG00000143643, ENSG00000197969, ENSG00000005175, ENSG00000125247, ENSG00000018699, ENSG00000104450, ENSG00000126214	1080	82	20569	3.48391	0.379479	0.0340839	0.0339314
UP_SEQ_FEATURE	DOMAIN:DOCKER	6	0.537634	0.000139409	ENSG00000135905, ENSG00000107099, ENSG00000088387, ENSG00000128512, ENSG00000147459, ENSG00000116641	1080	11	20569	10.3884	0.54104	0.0438534	0.0436571
UP_SEQ_FEATURE	DOMAIN:C2 DOCK-type	6	0.537634	0.000139409	ENSG00000135905, ENSG00000107099, ENSG00000088387, ENSG00000128512, ENSG00000147459, ENSG00000116641	1080	11	20569	10.3884	0.54104	0.0438534	0.0436571
UP_SEQ_FEATURE	REPEAT:WD 5	30	2.68817	0.0001429	ENSG00000157954, ENSG00000049167, ENSG00000110107, ENSG00000005448, ENSG00000157796, ENSG00000138674, ENSG00000159259, ENSG00000164253, ENSG00000122218, ENSG00000172869, ENSG00000060688, ENSG00000165521, ENSG00000106263, ENSG00000163625, ENSG00000164934, ENSG00000166359, ENSG00000214595, ENSG00000143476, ENSG00000071127, ENSG00000196792, ENSG00000198554, ENSG00000077380, ENSG00000085415, ENSG0000…	1080	264	20569	2.16425	0.549906	0.0438534	0.0436571
UP_SEQ_FEATURE	DOMAIN:Importin N-terminal	7	0.62724	0.000154233	ENSG00000065150, ENSG00000205339, ENSG00000124571, ENSG00000124207, ENSG00000133704, ENSG00000184575, ENSG00000086200	1080	17	20569	7.84221	0.577518	0.0438534	0.0436571
UP_SEQ_FEATURE	DOMAIN:Helicase ATP-binding	18	1.6129	0.0001574	ENSG00000108469, ENSG00000047188, ENSG00000197275, ENSG00000135829, ENSG00000112249, ENSG00000197299, ENSG00000137628, ENSG00000165392, ENSG00000153922, ENSG00000116830, ENSG00000156414, ENSG00000225830, ENSG00000088205, ENSG00000119969, ENSG00000051341, ENSG00000136492, ENSG00000100697, ENSG00000107201	1080	119	20569	2.88081	0.584929	0.0438534	0.0436571
UP_SEQ_FEATURE	MOTIF:DEAH box	11	0.985663	0.000159777	ENSG00000225830, ENSG00000108469, ENSG00000047188, ENSG00000197299, ENSG00000119969, ENSG00000051341, ENSG00000136492, ENSG00000165392, ENSG00000153922, ENSG00000116830, ENSG00000156414	1080	48	20569	4.36456	0.590404	0.0438534	0.0436571
UP_SEQ_FEATURE	REPEAT:WD	26	2.32975	0.000164862	ENSG00000049167, ENSG00000110107, ENSG00000138674, ENSG00000159259, ENSG00000164253, ENSG00000122218, ENSG00000172869, ENSG00000060688, ENSG00000165521, ENSG00000144426, ENSG00000163625, ENSG00000164934, ENSG00000166359, ENSG00000214595, ENSG00000143476, ENSG00000071127, ENSG00000196792, ENSG00000198554, ENSG00000085415, ENSG00000118965, ENSG00000143207, ENSG00000143669, ENSG00000120868, ENSG0000…	1080	215	20569	2.30316	0.601878	0.0438534	0.0436571
GOTERM_MF_DIRECT	GO:0004197~cysteine-type endopeptidase activity	13	1.16487	0.000168115	ENSG00000135913, ENSG00000064012, ENSG00000103811, ENSG00000172543, ENSG00000136943, ENSG00000135655, ENSG00000115464, ENSG00000135093, ENSG00000058056, ENSG00000138592, ENSG00000090686, ENSG00000187555, ENSG00000109861	1064	64	19304	3.68527	0.182842	0.0252383	0.0250491
GOTERM_CC_DIRECT	GO:0005657~replication fork	9	0.806452	0.000205035	ENSG00000108469, ENSG00000197299, ENSG00000182185, ENSG00000136492, ENSG00000164306, ENSG00000276043, ENSG00000165392, ENSG00000020922, ENSG00000159147	1072	33	20887	5.31386	0.146059	0.0131564	0.0126609
GOTERM_MF_DIRECT	GO:0003678~DNA helicase activity	10	0.896057	0.00021302	ENSG00000108469, ENSG00000197275, ENSG00000135829, ENSG00000197299, ENSG00000051341, ENSG00000136492, ENSG00000166508, ENSG00000165392, ENSG00000020922, ENSG00000113522	1064	39	19304	4.65201	0.225753	0.0284264	0.0282134
UP_KW_PTM	KW-1017~Isopeptide bond	154	13.7993	0.000231184	ENSG00000198464, ENSG00000178177, ENSG00000009307, ENSG00000171940, ENSG00000138674, ENSG00000114861, ENSG00000139644, ENSG00000078043, ENSG00000004534, ENSG00000189079, ENSG00000257923, ENSG00000140525, ENSG00000156261, ENSG00000276043, ENSG00000122257, ENSG00000106443, ENSG00000030419, ENSG00000111229, ENSG00000165392, ENSG00000152219, ENSG00000137871, ENSG00000005339, ENSG00000158710, ENSG0000…	891	1876	14252	1.31306	0.00530373	0.0013871	0.0013871
GOTERM_CC_DIRECT	GO:0000939~inner kinetochore	7	0.62724	0.000273062	ENSG00000120334, ENSG00000188312, ENSG00000151725, ENSG00000123219, ENSG00000166451, ENSG00000115942, ENSG00000142856	1072	19	20887	7.17837	0.189648	0.0161737	0.0155646
GOTERM_CC_DIRECT	GO:0005814~centriole	22	1.97133	0.000324471	ENSG00000126001, ENSG00000051825, ENSG00000172361, ENSG00000159079, ENSG00000176225, ENSG00000111554, ENSG00000173226, ENSG00000151466, ENSG00000156876, ENSG00000115355, ENSG00000174799, ENSG00000162063, ENSG00000164066, ENSG00000101639, ENSG00000166004, ENSG00000137177, ENSG00000265590, ENSG00000168014, ENSG00000101624, ENSG00000215041, ENSG00000142731, ENSG00000163611	1072	178	20887	2.40815	0.221108	0.0178459	0.0171738
GOTERM_CC_DIRECT	GO:0031464~Cul4A-RING E3 ubiquitin ligase complex	6	0.537634	0.000476578	ENSG00000143207, ENSG00000049167, ENSG00000174842, ENSG00000100991, ENSG00000143476, ENSG00000139842	1072	14	20887	8.35035	0.307227	0.0244643	0.0235429
GOTERM_CC_DIRECT	GO:0000932~P-body	15	1.34409	0.00063376	ENSG00000131018, ENSG00000009307, ENSG00000133243, ENSG00000135870, ENSG00000126070, ENSG00000114127, ENSG00000135473, ENSG00000151014, ENSG00000065978, ENSG00000151247, ENSG00000132256, ENSG00000166398, ENSG00000147894, ENSG00000100354, ENSG00000125107	1072	101	20887	2.89368	0.386239	0.0297989	0.0286766
GOTERM_CC_DIRECT	GO:0008023~transcription elongation factor complex	7	0.62724	0.000657899	ENSG00000109911, ENSG00000118985, ENSG00000225830, ENSG00000128915, ENSG00000083635, ENSG00000128886, ENSG00000116830	1072	22	20887	6.1995	0.397549	0.0297989	0.0286766
GOTERM_CC_DIRECT	GO:0000139~Golgi membrane	57	5.10753	0.000934218	ENSG00000175582, ENSG00000107854, ENSG00000153317, ENSG00000133103, ENSG00000111670, ENSG00000118276, ENSG00000122218, ENSG00000080371, ENSG00000166676, ENSG00000257923, ENSG00000101558, ENSG00000092108, ENSG00000124198, ENSG00000166710, ENSG00000085382, ENSG00000102471, ENSG00000111666, ENSG00000136542, ENSG00000171310, ENSG00000163291, ENSG00000134049, ENSG00000176920, ENSG00000100815, ENSG0000…	1072	710	20887	1.56422	0.513094	0.0391393	0.0376652
GOTERM_CC_DIRECT	GO:0000775~chromosome, centromeric region	11	0.985663	0.00100036	ENSG00000188312, ENSG00000170927, ENSG00000119969, ENSG00000083642, ENSG00000123219, ENSG00000139351, ENSG00000138778, ENSG00000122565, ENSG00000164754, ENSG00000129534, ENSG00000121892	1072	61	20887	3.51353	0.537295	0.0391393	0.0376652
GOTERM_CC_DIRECT	GO:0016363~nuclear matrix	17	1.5233	0.00101661	ENSG00000136518, ENSG00000173473, ENSG00000197299, ENSG00000049167, ENSG00000096063, ENSG00000196498, ENSG00000111676, ENSG00000066777, ENSG00000083635, ENSG00000159788, ENSG00000196504, ENSG00000189079, ENSG00000165410, ENSG00000184575, ENSG00000276043, ENSG00000122566, ENSG00000164754	1072	130	20887	2.54793	0.543051	0.0391393	0.0376652
GOTERM_CC_DIRECT	GO:0032991~protein-containing complex	55	4.92832	0.0011129	ENSG00000047621, ENSG00000157954, ENSG00000124151, ENSG00000073756, ENSG00000049323, ENSG00000197299, ENSG00000049167, ENSG00000001626, ENSG00000157077, ENSG00000083635, ENSG00000159259, ENSG00000118873, ENSG00000115234, ENSG00000152818, ENSG00000021826, ENSG00000139160, ENSG00000122257, ENSG00000082074, ENSG00000196792, ENSG00000064012, ENSG00000197442, ENSG00000131051, ENSG00000096384, ENSG0000…	1072	684	20887	1.56671	0.575741	0.0408064	0.0392695

## Sheet: STAD
Category	Term	Count	%	PValue	Genes	List Total	Pop Hits	Pop Total	Fold Enrichment	Bonferroni	Benjamini	FDR
GOTERM_CC_DIRECT	GO:0005829~cytosol	141	40.0568	6.07645e-09	ENSG00000124151, ENSG00000244607, ENSG00000180376, ENSG00000198862, ENSG00000157110, ENSG00000111596, ENSG00000153317, ENSG00000133026, ENSG00000138674, ENSG00000159259, ENSG00000143514, ENSG00000127948, ENSG00000257923, ENSG00000109790, ENSG00000127946, ENSG00000128915, ENSG00000013374, ENSG00000090686, ENSG00000092108, ENSG00000151092, ENSG00000257365, ENSG00000141179, ENSG00000130204, ENSG0000…	339	5649	20887	1.53789	2.72832e-06	2.72833e-06	2.69794e-06
GOTERM_CC_DIRECT	GO:0005654~nucleoplasm	102	28.9773	1.65115e-06	ENSG00000124151, ENSG00000244607, ENSG00000039123, ENSG00000157110, ENSG00000111596, ENSG00000159259, ENSG00000138796, ENSG00000078043, ENSG00000083123, ENSG00000089902, ENSG00000143514, ENSG00000257923, ENSG00000164053, ENSG00000136492, ENSG00000128915, ENSG00000151090, ENSG00000013374, ENSG00000090686, ENSG00000109674, ENSG00000164975, ENSG00000105229, ENSG00000099810, ENSG00000111224, ENSG0000…	339	4030	20887	1.55945	0.000741093	0.000370684	0.000366556
UP_KW_PTM	KW-0597~Phosphoprotein	207	58.8068	2.80167e-06	ENSG00000180376, ENSG00000157110, ENSG00000111596, ENSG00000153317, ENSG00000133026, ENSG00000115159, ENSG00000170448, ENSG00000089902, ENSG00000143514, ENSG00000127948, ENSG00000127946, ENSG00000128915, ENSG00000090686, ENSG00000130203, ENSG00000143183, ENSG00000134242, ENSG00000137871, ENSG00000137992, ENSG00000151247, ENSG00000173611, ENSG00000139496, ENSG00000165672, ENSG00000138160, ENSG0000…	287	8417	14252	1.22126	5.60318e-05	5.8835e-05	5.8835e-05
GOTERM_BP_DIRECT	GO:0006351~DNA-templated transcription	10	2.84091	1.23146e-05	ENSG00000183814, ENSG00000005075, ENSG00000151090, ENSG00000170365, ENSG00000141646, ENSG00000145386, ENSG00000078043, ENSG00000112541, ENSG00000173611, ENSG00000125630	323	87	19734	7.02253	0.0213081	0.0215259	0.0215259
UP_SEQ_FEATURE	DOMAIN:IQ 3	6	1.70455	2.01732e-05	ENSG00000066279, ENSG00000128833, ENSG00000167306, ENSG00000173226, ENSG00000133640, ENSG00000145555	343	21	20569	17.1337	0.0418079	0.0427066	0.0425856
UP_SEQ_FEATURE	COMPBIAS:Basic and acidic residues	128	36.3636	5.86793e-05	ENSG00000124151, ENSG00000244607, ENSG00000180376, ENSG00000152061, ENSG00000039123, ENSG00000197653, ENSG00000153317, ENSG00000133026, ENSG00000138674, ENSG00000159259, ENSG00000170448, ENSG00000100629, ENSG00000089902, ENSG00000257923, ENSG00000109790, ENSG00000164053, ENSG00000136492, ENSG00000128915, ENSG00000151090, ENSG00000090686, ENSG00000197121, ENSG00000153789, ENSG00000137871, ENSG0000…	343	5658	20569	1.35664	0.116821	0.0456512	0.0455218
UP_SEQ_FEATURE	TRANSIT:Mitochondrion	24	6.81818	6.46923e-05	ENSG00000198130, ENSG00000132423, ENSG00000133028, ENSG00000104687, ENSG00000112855, ENSG00000076555, ENSG00000066855, ENSG00000067704, ENSG00000137992, ENSG00000115159, ENSG00000132463, ENSG00000138796, ENSG00000135423, ENSG00000156502, ENSG00000083123, ENSG00000165672, ENSG00000150768, ENSG00000184047, ENSG00000123213, ENSG00000168827, ENSG00000087299, ENSG00000085760, ENSG00000139160, ENSG0000…	343	557	20569	2.5839	0.127993	0.0456512	0.0455218
GOTERM_CC_DIRECT	GO:0005813~centrosome	26	7.38636	0.000104244	ENSG00000244607, ENSG00000180376, ENSG00000103995, ENSG00000173588, ENSG00000132792, ENSG00000119541, ENSG00000173226, ENSG00000204899, ENSG00000100629, ENSG00000275835, ENSG00000160299, ENSG00000213186, ENSG00000139618, ENSG00000066279, ENSG00000104218, ENSG00000111785, ENSG00000176225, ENSG00000170004, ENSG00000110274, ENSG00000162063, ENSG00000188394, ENSG00000141646, ENSG00000145386, ENSG0000…	339	671	20887	2.38741	0.0457293	0.0156018	0.0154281
GOTERM_CC_DIRECT	GO:0005737~cytoplasm	124	35.2273	0.000217989	ENSG00000124151, ENSG00000157110, ENSG00000111596, ENSG00000153317, ENSG00000133026, ENSG00000138674, ENSG00000159259, ENSG00000138796, ENSG00000143514, ENSG00000109790, ENSG00000127946, ENSG00000136492, ENSG00000151092, ENSG00000130203, ENSG00000105229, ENSG00000143183, ENSG00000116514, ENSG00000153789, ENSG00000137757, ENSG00000134242, ENSG00000038382, ENSG00000137992, ENSG00000151366, ENSG0000…	339	5754	20887	1.32779	0.0932494	0.0244693	0.0241968
UP_KW_PTM	KW-0007~Acetylation	92	26.1364	0.00333073	ENSG00000124151, ENSG00000105514, ENSG00000039123, ENSG00000157110, ENSG00000133026, ENSG00000159259, ENSG00000138796, ENSG00000065615, ENSG00000130595, ENSG00000156502, ENSG00000083123, ENSG00000127948, ENSG00000136492, ENSG00000090686, ENSG00000092108, ENSG00000151092, ENSG00000128833, ENSG00000147475, ENSG00000213341, ENSG00000141179, ENSG00000198130, ENSG00000132423, ENSG00000105229, ENSG0000…	287	3511	14252	1.30122	0.0645482	0.0349726	0.0349726

## Sheet: UCEC
Category	Term	Count	%	PValue	Genes	List Total	Pop Hits	Pop Total	Fold Enrichment	Bonferroni	Benjamini	FDR
GOTERM_CC_DIRECT	GO:0005829~cytosol	44	44	5.5461e-05	ENSG00000163719, ENSG00000157954, ENSG00000156983, ENSG00000101391, ENSG00000115839, ENSG00000107854, ENSG00000135426, ENSG00000075413, ENSG00000198862, ENSG00000115514, ENSG00000204574, ENSG00000107719, ENSG00000020922, ENSG00000138674, ENSG00000115970, ENSG00000138032, ENSG00000116062, ENSG00000108064, ENSG00000161888, ENSG00000073969, ENSG00000154277, ENSG00000156795, ENSG00000114416, ENSG0000…	94	5649	20887	1.73073	0.0113603	0.011425	0.011425
UP_KW_PTM	KW-0007~Acetylation	33	33	0.00102469	ENSG00000124172, ENSG00000163719, ENSG00000163918, ENSG00000156983, ENSG00000076242, ENSG00000020922, ENSG00000205581, ENSG00000116062, ENSG00000146463, ENSG00000073969, ENSG00000196591, ENSG00000152078, ENSG00000126261, ENSG00000114416, ENSG00000180185, ENSG00000048828, ENSG00000198677, ENSG00000253729, ENSG00000076650, ENSG00000099256, ENSG00000067704, ENSG00000178425, ENSG00000170468, ENSG0000…	79	3511	14252	1.69563	0.0142505	0.0153703	0.0153703
