# Supplementary material for: Multicancer analyses of short tandem repeat variations reveal shared gene regulatory mechanisms
Source: Research Square preprint supplement (doi:10.21203/rs.3.rs-5775561/v1), 2025-01-09
Supplement: Supplementary file 4 [file additional_file_4.xlsx]

## Sheet: CRC
gene	str_id	msi_coef	msi_pvalue
BLOC1S2	chr10_100275426	-0.0166945	0.429916
OGA	chr10_101807909	0.0306377	0.0574156
ARL3	chr10_102714290	-0.0594482	0.000535233
ACSL5	chr10_112394905	-0.0234422	0.468032
ACSL5	chr10_112408299	-0.000554759	0.971834
ABLIM1	chr10_114444145	-0.0279163	0.12817
PROSER2	chr10_11870854	0.0605615	0.130388
PSTK	chr10_122986229	0.00485011	0.502802
ACADSB	chr10_123053170	-0.109652	0.0262539
LRRC27	chr10_132344477	-0.0632814	0.0242176
PHYH	chr10_13301858	-0.000747418	0.979942
PRPF18	chr10_13591929	-0.0010644	0.89601
FAM107B	chr10_14530300	-0.0388932	0.40741
RSU1	chr10_16782087	0.019478	0.272172
CUBN	chr10_17122774	0.00646809	0.581711
TRDMT1	chr10_17160377	0.00427522	0.680621
TRDMT1	chr10_17162248	0.0101453	0.294162
NEBL	chr10_20868835	0.0419095	0.0535897
NEBL	chr10_21172482	-0.00381458	0.773706
KIAA1217	chr10_24495086	0.0205004	0.119276
ARHGAP21	chr10_24670183	-0.335019	1.0841e-07
APBB1IP	chr10_26513705	-0.00977137	0.418499
MASTL	chr10_27165243	-0.00892481	0.717897
MPP7	chr10_28089898	0.0641796	0.116816
MTPAP	chr10_30316241	-0.0162159	0.097419
KIF5B	chr10_32038110	-0.0259221	0.167613
KIF5B	chr10_32040555	0.0869033	0.0314757
ERCC6	chr10_49476345	-0.0249031	0.150901
A1CF	chr10_50841764	0.0677374	0.180318
GDI2	chr10_5811961	0.0190582	0.0139329
RTKN2	chr10_62262824	0.00959632	0.617623
JMJD1C	chr10_63189521	-0.225608	0.00143833
PBLD	chr10_68296863	0.0132725	0.464157
ANXA7	chr10_73376076	0.0141296	0.290109
ANXA7	chr10_73387847	0.0092311	0.210053
ANXA11	chr10_80166227	0.063635	0.00312611
RNLS	chr10_88274911	0.0486125	0.221308
TNKS2	chr10_91819247	0.0124074	0.115356
TNKS2	chr10_91842189	0.153582	1.18915e-09
KIF11	chr10_92606591	-0.0115342	0.248974
TBC1D12	chr10_94493352	-0.0971464	0.00817687
HELLS	chr10_94558082	0.011486	0.508643
HELLS	chr10_94571548	-0.0286093	0.405877
HELLS	chr10_94593666	-0.00163609	0.934648
TM9SF3	chr10_96565481	0.0430582	0.0204663
TM9SF3	chr10_96576857	0.0334029	0.0567455
YAP1	chr11_102185992	0.0239153	0.119675
YAP1	chr11_102209595	0.0174487	0.376662
MMP20	chr11_102594772	-0.0108189	0.916934
DYNC2H1	chr11_103152110	-0.032941	0.019298
NPAT	chr11_108188043	-0.00562809	0.543233
C11orf65	chr11_108317540	-0.017172	0.75321
ALG9	chr11_111870383	-0.000492224	0.919921
TTC12	chr11_113360052	-0.0169658	6.10309e-06
NXPE1	chr11_114527906	-0.147285	0.00031333
SCN2B	chr11_118176520	0.174942	0.325403
CENATAC	chr11_119013171	-0.0283453	0.139001
TRAPPC4	chr11_119017259	-0.07283	0.00138374
TRAPPC4	chr11_119018676	0.0421181	1.95958e-05
CRTAM	chr11_122867355	0.012734	0.852906
VSIG2	chr11_124754810	-0.305342	0.00115243
ARNTL	chr11_13360519	-0.0178365	0.187941
PSMA1	chr11_14517770	0.00219798	0.891166
SOX6	chr11_16095915	-0.0364279	0.092695
SAAL1	chr11_18090326	-0.00798147	0.466019
LGR4	chr11_27392525	-0.0166484	0.360635
BDNF	chr11_27659149	-0.131327	0.00859747
ARL14EP	chr11_30336487	0.0326035	0.00221347
ELP4	chr11_31789913	-0.0127985	0.0518481
TCP11L1	chr11_33105858	-0.0797903	0.00487252
PDHX	chr11_34931532	-0.0188404	0.0105241
PRR5L	chr11_36403464	0.0335367	0.0551985
ARFGAP2	chr11_47165521	0.0241074	0.245888
TRIM5	chr11_5666091	0.00101226	0.887233
MED19	chr11_57704670	-0.00948585	0.215338
PRPF19	chr11_60898938	0.00759639	0.82695
CTSW	chr11_65880326	-0.0934905	0.0225564
RAB1B	chr11_66268823	0.0724803	0.00486134
ANO1	chr11_70152335	0.0109671	0.744758
PPFIA1	chr11_70326577	-0.013495	0.44008
RAB6A	chr11_73718903	-0.00236619	0.870984
C2CD3	chr11_74042224	0.00212753	0.775457
XRRA1	chr11_74933991	-0.068158	0.00167369
NDUFC2	chr11_78073101	0.138167	1.01275e-06
RIC3	chr11_8138416	-0.291864	0.00697362
DLG2	chr11_83469127	-0.016061	0.134948
TMEM135	chr11_87157320	-0.0187334	0.0780409
CTSC	chr11_88335085	-0.0725169	0.00275865
CHORDC1	chr11_90218200	0.000955443	0.964327
CEP295	chr11_93729980	-0.00167113	0.793538
IPO7	chr11_9409910	-0.0271255	0.425217
IPO7	chr11_9438046	0.00308424	0.413234
MRE11	chr11_94479765	0.0540215	0.00185172
PIWIL4	chr11_94616469	0.0741164	0.0168009
DEPDC4	chr12_100263385	-0.0502256	0.0891534
MYBPC1	chr12_101646639	0.723867	0.00351839
CHPT1	chr12_101734905	0.0599154	0.170683
SYCP3	chr12_101737313	-0.0738774	0.0595212
GNPTAB	chr12_101765329	-0.0637473	0.030803
STAB2	chr12_103683332	-0.0256871	0.0909208
STAB2	chr12_103692959	-0.0200314	0.287249
HCFC2	chr12_104067934	-0.0236376	0.0301369
CHST11	chr12_104602023	-0.0143285	0.260183
C12orf45	chr12_105070824	-0.0168386	0.242647
POLR3B	chr12_106427180	-0.00258115	0.778295
RIC8B	chr12_106843837	0.00588418	0.539738
TMEM263	chr12_106967099	-0.00406912	0.882789
CRY1	chr12_107000154	-0.0206779	0.180243
CRY1	chr12_107005085	-0.00584649	0.683271
CMKLR1	chr12_108293673	-0.015324	0.115352
USP30	chr12_109072282	-0.00307189	0.825426
ANAPC7	chr12_110396226	0.0010683	0.884756
ARPC3	chr12_110435323	0.00873433	0.505822
FAM216A	chr12_110472976	-0.000379152	0.938321
NAA25	chr12_112053679	-0.0254345	0.300972
MED13L	chr12_115980955	0.0671768	4.79454e-05
RFC5	chr12_118025849	-0.0154437	0.142264
RNF10	chr12_120528806	0.0170646	0.016703
P2RX7	chr12_121180469	-0.00893791	0.671426
ZCCHC8	chr12_122477791	-0.0268368	0.00527342
KNTC1	chr12_122603273	-0.00569416	0.576725
MPHOSPH9	chr12_123181219	-0.089752	0.0511983
MPHOSPH9	chr12_123194625	-0.000531111	0.926936
MPHOSPH9	chr12_123218528	-0.0263199	0.137836
DNAH10	chr12_123757912	-0.0127159	0.543574
DNAH10	chr12_123881604	-0.0527982	0.0884507
NCOR2	chr12_124325378	-0.012079	0.415364
H2AJ	chr12_14775537	0.0193602	0.565956
H2AJ	chr12_14777095	0.0980882	0.0213361
CMAS	chr12_22062261	-0.00779874	0.438777
RHNO1	chr12_2887893	0.0245241	0.132227
IPO8	chr12_30669293	-0.0669346	0.0812747
ETFBKMT	chr12_31667631	-0.00598006	0.587453
FGD4	chr12_32608104	0.00277015	0.93818
FGD4	chr12_32619632	-0.0182926	0.669312
ABCD2	chr12_39607746	0.0116063	0.777947
SLC2A13	chr12_39864886	-0.0101992	0.43457
GXYLT1	chr12_42109524	-0.0125306	0.184624
C12orf4	chr12_4535996	-0.014993	0.252609
ARID2	chr12_45893388	-0.0231641	0.0887672
RPAP3	chr12_47701281	0.28141	0.00125491
CCNT1	chr12_48698186	-0.00565201	0.609021
TMBIM6	chr12_49759165	0.0873479	0.115255
PFDN5	chr12_53299137	-0.00957186	0.216498
NCKAP1L	chr12_54532088	-0.00445189	0.70902
RAB5B	chr12_55987167	0.0129181	0.343312
ZC3H10	chr12_56117139	0.0105664	0.313802
PAN2	chr12_56327636	-0.0744909	0.00459287
DCTN2	chr12_57535462	0.0415748	0.00163481
TSFM	chr12_57783597	-0.00600064	0.721808
USP15	chr12_62384319	-0.00477294	0.650331
USP15	chr12_62392052	-0.012644	0.407996
SRGAP1	chr12_64097223	-0.00558924	0.612929
XPOT	chr12_64418975	0.125291	0.000980366
TBK1	chr12_64464321	-0.0155043	0.394948
MSRB3	chr12_65368924	0.053361	0.0379598
NOP2	chr12_6561989	-0.0313678	0.0222049
LLPH	chr12_66128849	-0.00383809	0.625162
MDM1	chr12_68302882	-0.00608891	0.586621
RAP1B	chr12_68648675	-0.0341898	0.0171596
RAP1B	chr12_68656567	-0.0394441	0.0458732
MDM2	chr12_68820302	-0.0301162	0.124303
ATN1	chr12_6936717	0.0137821	0.000381655
ZFC3H1	chr12_71626210	0.0345213	0.00237261
RAB21	chr12_71774045	-0.0550509	0.00958566
TRHDE	chr12_72618870	0.117945	0.0582762
ATP2B1	chr12_89611385	0.0046237	0.842673
ATP2B1	chr12_89621803	-0.0057368	0.671641
FGD6	chr12_95104972	-0.0232521	0.0504578
APAF1	chr12_98723620	-0.00740088	0.478051
TMTC4	chr13_100656543	0.0146778	0.180995
CUL4A	chr13_113244840	0.0134647	0.455794
LAMP1	chr13_113310688	0.000678611	0.983694
TFDP1	chr13_113585753	-0.00275783	0.877897
CDC16	chr13_114236623	-0.0172448	0.438292
CDC16	chr13_114238860	0.0209881	0.495515
CDC16	chr13_114243499	0.0414416	0.276708
CDC16	chr13_114246076	0.0317593	0.14618
MPHOSPH8	chr13_19642041	0.00155309	0.863495
ZMYM2	chr13_20059331	-0.0119242	0.705712
ZMYM2	chr13_20059684	0.0486491	0.178388
ZMYM2	chr13_20081999	0.00798573	0.765181
ZDHHC20	chr13_21378769	0.00695245	0.676848
LNX2	chr13_27559820	-0.00410814	0.83461
POMP	chr13_28664486	0.00327052	0.906822
HMGB1	chr13_30621273	0.00874374	0.705114
USPL1	chr13_30621273	-0.00912744	0.662656
HSPH1	chr13_31148484	0.051856	0.0264646
PDS5B	chr13_32741052	0.0140264	0.0346601
PDS5B	chr13_32770750	0.0451538	0.149397
PDS5B	chr13_32775098	-0.00558019	0.405479
RFC3	chr13_33823926	0.174136	0.000193609
EXOSC8	chr13_37005863	-0.000362076	0.967314
SUPT20H	chr13_37021978	0.024653	0.25257
FREM2	chr13_38872997	0.00139648	0.994846
COG6	chr13_39724484	-0.00199782	0.916309
ELF1	chr13_40942890	0.0217677	0.683046
ELF1	chr13_41065290	-0.00666642	0.556504
WBP4	chr13_41065290	-0.0133082	0.230839
MTRF1	chr13_41252555	0.0556715	0.0698049
NUFIP1	chr13_44982157	0.0107155	0.495572
KPNA3	chr13_49732688	0.0161415	0.484824
KCNRG	chr13_50011916	-0.0879299	0.0596094
KCNRG	chr13_50013519	0.00247076	0.934324
DHRS12	chr13_51791272	0.010156	0.389048
NEK3	chr13_52133617	0.0118803	0.0194201
NEK3	chr13_52152573	-0.0125584	0.63087
VPS36	chr13_52415926	0.00808616	0.829789
VPS36	chr13_52433752	0.0710779	0.000646403
VPS36	chr13_52436219	0.0176798	4.91329e-05
PCDH17	chr13_57632451	-0.0270276	0.00394095
PIBF1	chr13_72973578	0.00465113	0.857187
KLF5	chr13_73063984	0.0207148	0.0688567
KLF5	chr13_73075617	0.0870899	0.0208073
SLAIN1	chr13_77742920	0.0219359	0.6231
RBM26	chr13_79369032	0.0567661	0.016501
RBM26	chr13_79371937	0.00943785	0.553184
NDFIP2	chr13_79521009	0.0313246	0.081341
IPO5	chr13_97982484	0.0107785	0.548468
DOCK9	chr13_98888144	0.0870495	0.0567494
UBAC2	chr13_99314263	-0.000676137	0.925708
MARK3	chr14_103498471	0.0041579	0.432859
KLC1	chr14_103574079	-0.00234201	0.54344
TDRD9	chr14_103998792	-0.0676636	0.148592
TTC5	chr14_20295661	-0.011099	0.430001
PSMB5	chr14_23027652	0.0353703	0.122105
SCFD1	chr14_30722463	-0.00793815	0.17128
STRN3	chr14_30955585	0.0100327	0.444835
NUBPL	chr14_31673280	0.0466185	0.0616426
NUBPL	chr14_31673339	0.0160253	0.0188749
CFL2	chr14_34713143	-0.0642972	0.00108215
SRP54	chr14_35008885	-0.00453022	0.406274
BRMS1L	chr14_35863976	-0.0350917	0.159483
MIPOL1	chr14_37309689	-0.0495907	0.329997
GEMIN2	chr14_39124931	-0.0111467	0.438248
TRAPPC6B	chr14_39151681	-0.00513496	0.649632
KLHL28	chr14_44931210	-0.0179166	0.216282
KLHL28	chr14_45044624	-0.0099564	0.741638
PRPF39	chr14_45096296	-0.0168039	0.0109019
MIS18BP1	chr14_45246816	0.0506033	0.00975478
POLE2	chr14_49679830	-0.0136818	0.394949
L2HGDH	chr14_50294251	-0.052241	0.0122782
PYGL	chr14_50881564	-0.0387735	0.097695
ERO1A	chr14_52682237	-0.321578	0.00454852
STYX	chr14_52768828	-0.0302726	0.00924058
DDHD1	chr14_53055921	0.00478984	0.729209
WDHD1	chr14_54963185	0.00923555	0.330276
WDHD1	chr14_55008794	-0.0927224	0.000154028
LGALS3	chr14_55145289	0.0680631	0.0176673
DLGAP5	chr14_55169343	-0.0172984	0.0146833
ARMH4	chr14_58004661	-0.0308053	0.0702254
ARMH4	chr14_58208106	0.0147966	0.450495
JKAMP	chr14_59495255	-0.0138356	0.100764
PCNX4	chr14_60114682	-0.0138049	0.543809
PCNX4	chr14_60121157	0.0110288	0.0402697
PCNX4	chr14_60150197	-0.00085996	0.815664
HIF1A	chr14_61727395	-0.0345585	0.497812
HIF1A	chr14_61738031	-0.0246932	0.16422
ESR2	chr14_64224927	0.00905098	0.743785
MTHFD1	chr14_64400961	0.00921443	0.691846
ZBTB25	chr14_64473780	-0.062908	0.173164
FNTB	chr14_65006157	0.00841438	0.11662
ATP6V1D	chr14_67316768	0.0857215	1.71769e-05
PLEKHH1	chr14_67561870	-0.0254531	0.13198
RAD51B	chr14_68115543	-0.00151646	0.853801
RAD51B	chr14_68468039	-0.0106433	0.396101
EXD2	chr14_69209825	-0.00304995	0.715861
COQ6	chr14_73959582	-0.0112457	0.326424
ENTPD5	chr14_73959582	0.0679374	0.0205533
ALDH6A1	chr14_74067572	-0.0280175	0.483689
DLST	chr14_74889368	-0.0139394	0.0847374
ZC2HC1C	chr14_75107513	0.000438919	0.98384
TTLL5	chr14_75771912	-0.0569947	0.00864322
ZC3H14	chr14_88620935	-0.00318225	0.484813
EML5	chr14_88620935	-0.0536917	0.157371
RPS6KA5	chr14_90899303	0.0079288	0.143503
RPS6KA5	chr14_90906342	0.0217289	0.0266969
RPS6KA5	chr14_91001050	-0.0038788	0.77675
RPS6KA5	chr14_91001178	-0.016375	0.201211
DGLUCY	chr14_91173268	-0.0467804	0.074348
CATSPERB	chr14_91723202	-0.0101278	0.642014
TC2N	chr14_91792562	-0.0240566	0.703133
TC2N	chr14_91797737	-0.114314	0.00892327
TRIP11	chr14_91974786	0.000891666	0.953117
DICER1	chr14_95099733	0.0201268	0.00531856
ATG2B	chr14_96304616	-0.00635868	0.21359
ATG2B	chr14_96322277	-0.0167839	0.406801
ATG2B	chr14_96332215	-0.0155474	0.158475
GSKIP	chr14_96382229	-0.0326836	0.201873
AK7	chr14_96437808	-0.208364	0.000802191
AK7	chr14_96449896	0.0120102	0.429444
TARS3	chr15_101715044	-0.0430906	0.0352072
CYFIP1	chr15_22914923	0.162464	0.00372141
ARHGAP11A	chr15_32635759	-0.0491415	0.0434212
RYR3	chr15_33631302	-0.0218263	0.367089
RYR3	chr15_33860497	-0.0210952	0.164484
SLC12A6	chr15_34251098	-0.0387727	0.0183485
MEIS2	chr15_36950240	0.0102869	0.587624
MEIS2	chr15_37099552	0.00136946	0.944944
FSIP1	chr15_39764032	0.0893892	0.00061837
KNL1	chr15_40650518	0.00431091	0.706559
KNL1	chr15_40659264	-0.00804843	0.575844
MGA	chr15_41698839	-0.0291227	0.0287531
UBR1	chr15_43015642	-0.021022	0.0854186
ELL3	chr15_43775276	-0.0430327	0.278274
GOLM2	chr15_44379619	-0.00821564	0.620916
CTDSPL2	chr15_44486759	0.0019533	0.827914
EIF3J	chr15_44560236	0.0170855	0.347252
B2M	chr15_44711583	0.225528	0.00039297
TRIM69	chr15_44736722	-0.0117958	0.487336
FAM227B	chr15_49328775	-0.0301701	0.151459
USP8	chr15_50490238	-0.00467269	0.616906
DMXL2	chr15_51453436	-0.011768	0.516673
DMXL2	chr15_51476559	-0.00639744	0.621836
MYO5C	chr15_52214741	-0.00472762	0.613694
MYO5C	chr15_52269695	-0.00352741	0.83276
MYO5A	chr15_52348794	-0.00341148	0.738104
FAM214A	chr15_52611107	-0.0303121	0.129835
RAB27A	chr15_55321208	0.00151874	0.922022
PIGB	chr15_55321208	-0.0115856	0.186689
CCPG1	chr15_55385568	-0.0393637	0.296349
TEX9	chr15_56277959	0.00612601	0.806449
TEX9	chr15_56428352	-0.00298485	0.898952
ZNF280D	chr15_56654506	0.010201	0.37042
ZNF280D	chr15_56682487	-0.0018464	0.77156
ADAM10	chr15_58599751	-0.0330701	0.0525201
ADAM10	chr15_58682151	-0.00536843	0.767008
ADAM10	chr15_58717732	0.00341515	0.815435
MINDY2	chr15_58802296	-0.0224433	0.0114344
CCNB2	chr15_59123690	-0.0452278	0.0581593
FAM81A	chr15_59514275	-0.0233745	0.35775
GTF2A2	chr15_59650605	0.0638262	0.0508698
ICE2	chr15_60453583	-0.0239876	0.26477
RPS27L	chr15_63155734	-0.0261171	0.236021
MTFMT	chr15_65020277	-0.0112926	0.247953
RPL4	chr15_66528809	0.0282578	0.280653
ZWILCH	chr15_66528809	-0.0135681	0.517483
IQCH	chr15_67360042	-0.0230278	0.273485
HEXA	chr15_72355713	-0.0252591	0.0941708
CCDC33	chr15_74243945	0.280683	0.285913
CTSH	chr15_78939176	0.0690975	0.0130278
HOMER2	chr15_82990544	-0.00258186	0.849477
TM6SF1	chr15_83136458	-0.00885617	0.660931
FANCI	chr15_89273512	0.00240487	0.688964
TICRR	chr15_89582988	-0.0289264	0.0941717
BLM	chr15_90769421	-0.0514583	0.137154
MCTP2	chr15_94314437	-0.00925841	0.363925
TVP23A	chr16_10761665	-0.0102739	0.523631
TVP23A	chr16_10773346	0.00230631	0.928626
GSPT1	chr16_11887022	0.00468377	0.531884
GSPT1	chr16_11891152	0.0379759	0.00904384
MYH11	chr16_15798609	0.0179132	0.290679
FAHD1	chr16_1828275	0.0123302	0.241245
FAHD1	chr16_1837877	-0.142767	3.63205e-22
ITPRIPL2	chr16_19119477	-0.0381777	0.0609077
SYT17	chr16_19172636	-0.0152101	0.288429
KNOP1	chr16_19714384	0.0451145	0.00856285
ERI2	chr16_20791928	-0.0200555	0.0239069
ERI2	chr16_20799842	-0.0335459	0.000856991
REXO5	chr16_20845312	0.0028409	0.877435
PRKCB	chr16_24174495	-0.00274051	0.86337
CCNF	chr16_2431054	-0.0187148	0.519463
RBBP6	chr16_24563371	0.0356618	0.00028619
QPRT	chr16_29665058	0.0150494	0.814307
QPRT	chr16_29668845	0.148689	0.00349754
QPRT	chr16_29669204	0.0463484	0.404048
QPRT	chr16_29669877	0.0249903	0.300124
BICDL2	chr16_3027705	0.0392029	0.16622
FUS	chr16_31191378	0.0175507	0.193344
ITGAX	chr16_31377314	-0.0124283	0.401988
MEFV	chr16_3244155	-0.0492814	0.25633
NLRC3	chr16_3544163	-0.00231387	0.84498
CREBBP	chr16_3758052	0.00858593	0.458733
DECR2	chr16_410794	0.049429	0.0669827
PHKB	chr16_47547570	0.033614	0.0466873
GLYR1	chr16_4811103	-0.014918	0.444521
SEC14L5	chr16_4987498	-0.0278315	0.0203859
MT1X	chr16_56684104	-0.070719	0.0232441
PSME3IP1	chr16_57154202	0.0743869	0.0651903
CNOT1	chr16_58543412	0.0362814	0.0856056
CNOT1	chr16_58551275	0.0628829	0.00254897
CNOT1	chr16_58560437	0.0681709	0.00823301
LRRC36	chr16_67350158	0.0459314	0.0630713
CYB5B	chr16_69459071	0.0109175	0.511967
NFAT5	chr16_69653174	0.0592252	0.00916193
IL34	chr16_70659970	0.0497149	0.0116591
PSMD7	chr16_74302350	0.045625	0.0218086
GLG1	chr16_74496715	-0.0138009	0.00865838
KARS1	chr16_75640355	0.00416114	0.594924
RBFOX1	chr16_7710845	0.162704	0.0490237
CENPN	chr16_81032555	-0.0317586	0.014546
USP7	chr16_8916970	0.00331775	0.532747
ZSWIM7	chr17_15993796	-0.0975303	0.0105494
NCOR1	chr17_16153294	0.0437455	0.191058
PIGL	chr17_16233931	-0.0110648	0.405481
PIGL	chr17_16349915	-0.0478667	0.148766
RAI1	chr17_17793780	-0.0243865	0.00513658
ATPAF2	chr17_18028571	-0.00933234	0.0933365
AKAP10	chr17_19947374	-0.0127599	0.305919
TSR1	chr17_2335448	0.00630876	0.730034
SGSM2	chr17_2335448	-0.0313794	0.0936257
ATAD5	chr17_30830864	0.0118343	0.387371
ATAD5	chr17_30868427	0.00191812	0.858222
ATAD5	chr17_30879566	-0.0147664	0.455084
CCT6B	chr17_34942755	-0.186583	0.0132628
TAF15	chr17_35834733	0.0348586	0.0114715
MRPL45	chr17_38322032	0.0171251	0.251368
MLLT6	chr17_38722649	0.0109124	0.448018
CDC6	chr17_40293443	-0.0218853	0.683216
CDC6	chr17_40295488	-0.0185019	0.476295
ACLY	chr17_41868672	0.103109	0.0108746
NBR1	chr17_43209863	-0.00558277	0.790694
TMEM106A	chr17_43209863	-0.0227849	0.308937
RPAIN	chr17_5421259	-0.000353212	0.9837
VPS53	chr17_562754	-0.0244003	0.0730016
TRIM37	chr17_59064408	-0.0160275	0.139418
BRIP1	chr17_61780239	-0.00806567	0.487694
CCDC47	chr17_63747038	0.073852	0.0372435
ABCA10	chr17_69182836	-0.0138717	0.629725
NEURL4	chr17_7325146	-0.0355511	0.0395484
RECQL5	chr17_75630842	0.0171481	0.151322
RNF157	chr17_76212542	0.0687512	0.00851885
DNAH2	chr17_7797102	0.00861622	0.661235
B3GNTL1	chr17_83035183	-0.0240806	0.16463
NAPG	chr18_10530668	-0.0262609	0.171644
CEP76	chr18_12680597	-0.0180635	0.192594
SEH1L	chr18_12986804	-0.0092111	0.597876
CEP192	chr18_12986804	-0.034806	0.0496378
ESCO1	chr18_21539853	-0.0245186	0.0657871
SNRPD1	chr18_21622930	-0.00962335	0.601539
IMPACT	chr18_24437927	0.00483949	0.8466
SMCHD1	chr18_2674161	-0.0124507	0.330132
DSG1	chr18_31343816	-0.0105106	0.898216
B4GALT6	chr18_31658114	-0.00622997	0.645883
TRAPPC8	chr18_31855816	-0.0013283	0.845918
GAREM1	chr18_32190206	-0.0137283	0.398354
RPRD1A	chr18_36031100	-0.0290109	0.179601
KIAA1328	chr18_36835395	-0.0528393	0.0528219
KIAA1328	chr18_36844193	0.00766463	0.498098
KIAA1328	chr18_36885537	-0.00185569	0.78503
EPG5	chr18_45865766	0.00172959	0.835101
EPG5	chr18_45907921	-0.016446	0.134758
EPG5	chr18_45943921	-0.0690999	0.00211542
PIAS2	chr18_46812342	0.0211487	0.0976281
PIAS2	chr18_46844143	0.00915541	0.428501
PIAS2	chr18_46844689	-0.012725	0.657474
PIAS2	chr18_46864254	-0.0189501	0.158203
IER3IP1	chr18_47156015	-0.0153334	0.517464
DYM	chr18_49281954	-0.0363295	0.25079
DYM	chr18_49363255	-0.0161197	0.173305
CFAP53	chr18_50261253	-0.0501879	0.00629889
SMAD4	chr18_51058486	0.00837463	0.233954
NEDD4L	chr18_58357165	-0.00400044	0.707781
ALPK2	chr18_58607489	-0.0880467	0.158481
PIGN	chr18_62072730	-0.0149234	0.00375398
PIGN	chr18_62140315	-0.00445485	0.638527
PIGN	chr18_62140376	0.0520195	0.000156332
RELCH	chr18_62227270	0.000592849	0.971122
RELCH	chr18_62275354	-0.000738922	0.961158
RELCH	chr18_62275514	0.00438029	0.555471
PHLPP1	chr18_62905205	-0.0144548	0.414451
TMX3	chr18_68700490	-0.00776233	0.505671
ARHGAP28	chr18_6870796	-0.159827	0.000218263
CD226	chr18_69946709	-0.0420081	0.0267798
CD226	chr18_69947439	-0.00922245	0.619747
RTTN	chr18_70086695	-0.0063405	0.187918
RTTN	chr18_70142397	-0.0715739	0.000342896
ZNF236	chr18_76880037	-0.0315567	0.00211384
ATP9B	chr18_79253287	0.023892	0.23871
ATP9B	chr18_79348249	-0.00212063	0.736591
TXNL4A	chr18_79977715	-0.000145144	0.992824
PTPRM	chr18_8384460	0.160729	0.00797342
NDUFV2	chr18_9124802	0.00587658	0.877999
VAPA	chr18_9954233	-0.0184178	0.106428
SLC44A2	chr19_10631006	0.00487409	0.676848
C19orf38	chr19_10858227	-0.0172621	0.124049
RAB3D	chr19_11342757	-0.0649844	0.0370284
AC008770.2	chr19_11951151	-0.33207	0.00484148
ZNF433	chr19_12017799	-0.0332415	0.0156137
ADGRE5	chr19_14388228	0.0496968	0.00709908
GIPC1	chr19_14489892	0.0138838	0.399803
TPM4	chr19_16076004	0.0193309	0.0530798
ZNF253	chr19_19878459	0.105653	0.00152239
BTBD2	chr19_2037632	0.0132463	0.547274
URI1	chr19_30005629	0.0367683	0.210701
DPY19L3	chr19_32438944	-0.030806	0.000295635
GPATCH1	chr19_33094314	0.0446698	0.12197
WDR88	chr19_33129950	-0.053043	0.032713
GARRE1	chr19_34333674	0.00939853	0.323831
GARRE1	chr19_34341388	0.0150996	0.425378
UBA2	chr19_34434825	0.0168951	0.471998
UBA2	chr19_34454427	0.0589161	0.00193179
UBA2	chr19_34460452	0.00566348	0.640214
COX6B1	chr19_35654508	0.0129552	0.356513
ZNF573	chr19_37791851	-0.0148832	0.222003
CATSPERG	chr19_38362867	-0.0300721	0.0447126
C19orf54	chr19_40749405	-0.0102408	0.272358
CEACAM7	chr19_41687331	0.150678	0.00113412
APOC1	chr19_44916409	1.27108	2.35474e-05
CLASRP	chr19_45068312	-0.133227	0.000474374
FUT2	chr19_48704422	0.0208116	0.000661232
UHRF1	chr19_4947051	-0.024861	0.338423
ZNF480	chr19_52315815	0.0221827	0.364665
OSCAR	chr19_54099815	-0.0427695	0.0210641
NDUFA3	chr19_54099815	-0.00646004	0.636343
SSC5D	chr19_55489059	0.0701183	0.00576121
ZNF17	chr19_57417846	-0.00887944	0.301377
ADGRE1	chr19_6908665	-0.0346425	0.0629483
TRAPPC5	chr19_7679190	0.01559	0.528028
ZNF266	chr19_9417748	-0.0543396	0.0498044
AC118553.2	chr1_100077147	0.0376785	0.418949
MFSD14A	chr1_100077147	-0.0618259	0.012464
SASS6	chr1_100110558	-0.00316525	0.890951
DBT	chr1_100206311	-0.016751	0.160732
DBT	chr1_100218787	0.00123213	0.928446
SLC30A7	chr1_100974788	-0.0191821	0.217149
KIF1B	chr1_10297149	0.000487985	0.947715
VAV3	chr1_107617639	-0.0272104	0.658537
INKA2	chr1_111695325	-0.00268668	0.935325
INKA2	chr1_111697417	-0.00468105	0.660677
INKA2	chr1_111759389	-0.0175336	0.529745
INKA2	chr1_111760456	-0.0269795	0.0536071
ST7L	chr1_112616743	-0.0193534	0.0496914
LRIG2	chr1_113093331	-0.00672748	0.728465
PTPN22	chr1_113829711	-0.0171305	0.575961
NRAS	chr1_114718230	0.0193138	0.250702
CSDE1	chr1_114737573	0.016014	0.480062
TTF2	chr1_117062509	-0.0118541	0.349416
MTMR11	chr1_149929094	0.00723704	0.801023
CA14	chr1_150263916	-0.0188401	0.104502
FHAD1	chr1_15328242	0.00264395	0.833039
UBAP2L	chr1_154254817	-0.00278991	0.680776
DNAJC16	chr1_15546896	-0.0106896	0.141116
DAP3	chr1_155709753	0.00763972	0.665259
DAP3	chr1_155716949	0.00713813	0.425445
DDI2	chr1_15638531	0.0215318	0.00298953
TAGLN2	chr1_159927892	0.0217017	0.241518
COPA	chr1_160293497	0.0207976	0.112603
CD48	chr1_160711864	-0.00385633	0.838557
APOA2	chr1_161223056	-0.122988	0.00487797
SDHC	chr1_161362302	0.0226846	0.156716
POU2F1	chr1_167416088	-0.020655	0.271815
TIPRL	chr1_168196530	0.0120897	0.529278
FASLG	chr1_172659642	-0.0247997	0.521187
CENPL	chr1_173828314	-0.00782751	0.502204
RC3H1	chr1_173961706	-0.101766	0.0105536
RABGAP1L	chr1_174892724	-0.0289722	0.0969086
COP1	chr1_176081295	0.00877169	0.316721
TOR3A	chr1_179085423	0.0199835	0.0930494
DHX9	chr1_182856417	0.0169904	0.399431
SMG7	chr1_183512809	-0.00246012	0.765643
PTGS2	chr1_186678192	-0.109687	0.00819444
ASPM	chr1_197128344	-0.0160745	0.195338
KIF14	chr1_200581116	-0.00934146	0.071814
KIF14	chr1_200589159	-0.0333016	0.0684675
DTL	chr1_212044603	0.0120826	0.128149
DTL	chr1_212068373	-0.0166137	0.360772
TATDN3	chr1_212796501	-0.0118392	0.115321
USP48	chr1_21690186	0.000829398	0.910086
USP48	chr1_21704399	-0.0219273	0.0605228
USP48	chr1_21706893	0.00893952	0.330928
USP48	chr1_21756475	-0.000956991	0.931651
USP48	chr1_21757792	-0.0112083	0.380761
RAB3GAP2	chr1_220196404	0.00602654	0.6444
DISP1	chr1_222983065	-0.0246201	0.156035
LBR	chr1_225412650	0.00395348	0.726113
SRP9	chr1_225783137	0.0419784	0.325286
TMEM63A	chr1_225872095	0.0831654	0.0315141
CDC42BPA	chr1_227143115	0.429572	0.000603928
EPHB2	chr1_22913753	0.0426579	0.519927
TTC13	chr1_230958305	-0.0259124	0.0354285
ARV1	chr1_230995821	0.173722	8.56134e-06
SIPA1L2	chr1_232428351	0.00696425	0.626988
COA6	chr1_234383707	0.0784779	1.26543e-06
TARBP1	chr1_234465711	0.00362476	0.757508
RBM34	chr1_235138182	-0.0170289	0.221136
RBM34	chr1_235152774	0.0238124	0.151063
AL357556.3	chr1_235344152	0.00145615	0.857466
B3GALNT2	chr1_235470833	-0.0139779	0.520782
LYST	chr1_235775089	-0.0121932	0.426222
ERO1B	chr1_236230100	-0.0398936	0.0858925
LGALS8	chr1_236550993	-0.0130096	0.101135
EXO1	chr1_241871912	0.0164823	0.0887562
EYA3	chr1_28048326	-0.000600686	0.963793
GMEB1	chr1_28690194	-0.0026429	0.662575
GMEB1	chr1_28714874	-0.00643324	0.747863
SNRNP40	chr1_31293159	-0.0319119	0.0582414
ZBTB8OS	chr1_32621967	-0.0063982	0.499876
RNF19B	chr1_32936734	-0.0125222	0.241376
AGO3	chr1_35945667	-0.0175535	0.141807
AGO3	chr1_36009426	-0.0399651	0.00159374
UTP11	chr1_38018994	-0.0111226	0.388559
DFFB	chr1_3872415	-0.0212317	0.15738
YBX1	chr1_42696512	0.011456	0.303989
ARMH1	chr1_44689922	-0.0185821	0.426946
ARMH1	chr1_44704040	0.0195087	0.362207
EIF2B3	chr1_44941510	0.159554	9.5331e-07
EPS15	chr1_51460954	-0.0293781	0.0551871
ZFYVE9	chr1_52263754	-0.0131041	0.113497
SSBP3	chr1_54404809	0.0138707	0.278042
ACOT11	chr1_54614941	-0.0173788	0.000570069
NFIA	chr1_60865489	-0.0212224	0.110769
DOCK7	chr1_62578718	-0.00323192	0.75163
DOCK7	chr1_62578975	0.0101329	0.169218
DOCK7	chr1_62619809	-0.0229924	0.0250088
DOCK7	chr1_62625415	-0.0187488	0.351123
DOCK7	chr1_62663166	-0.0123339	0.198343
ITGB3BP	chr1_63446876	0.0126044	9.97111e-07
SGIP1	chr1_66633167	-0.0656437	0.00821926
SGIP1	chr1_66741261	-0.0412343	0.0775721
MIER1	chr1_66959812	-0.00825532	0.631274
DEPDC1	chr1_68489670	-0.0353873	0.224304
PTGER3	chr1_70862254	-0.116959	4.62392e-05
ACADM	chr1_75733711	-0.166135	5.8203e-05
TNFRSF9	chr1_7920926	-0.00868711	0.810126
PARK7	chr1_7969441	0.0245902	0.127376
COL24A1	chr1_85889732	-0.0610755	0.017264
COL24A1	chr1_85970275	-0.0474676	0.0611463
PKN2	chr1_88824272	-0.0190849	0.249041
LRRC8C	chr1_89715065	-0.0847217	0.00816113
GLMN	chr1_92297535	0.0109503	0.407686
RPAP2	chr1_92297535	-0.0159645	0.0619244
RPAP2	chr1_92300324	-0.00403556	0.743002
RPAP2	chr1_92380930	-0.0447003	0.00211529
EVI5	chr1_92677229	-0.0640087	0.0628742
CCDC18	chr1_93226299	-0.0109309	0.286769
ARHGAP29	chr1_94177588	-0.00247722	0.914802
SLC25A33	chr1_9573330	-0.0054692	0.694374
SNX7	chr1_98698691	0.00514116	0.778499
ESF1	chr20_13775083	0.0126713	0.621618
HM13	chr20_31569101	-0.000552476	0.977687
TPX2	chr20_31766455	0.00878593	0.286465
NOL4L	chr20_32486641	0.0147504	0.60163
COMMD7	chr20_32706513	0.0631536	0.0025296
CDK5RAP1	chr20_33367014	0.00257227	0.890055
CDK5RAP1	chr20_33387257	0.00966921	0.477205
ITCH	chr20_34445261	0.00289884	0.740838
ITCH	chr20_34466325	0.00402392	0.905613
PIGU	chr20_34637990	-0.00106904	0.959856
NCOA6	chr20_34746931	-0.00815799	0.279799
NCOA6	chr20_34750523	0.044656	0.0905404
TRPC4AP	chr20_35077973	0.0145789	0.409115
CEP250	chr20_35511337	0.0297169	0.183795
CPNE1	chr20_35658804	-0.0336841	1.41884e-05
RBM39	chr20_35707028	0.0133259	0.0357223
RBM39	chr20_35716695	0.0166425	0.27144
RBM39	chr20_35724433	0.020955	0.290274
RBM39	chr20_35736431	0.0179435	0.330327
PHF20	chr20_35842553	-0.0151906	0.518644
PHF20	chr20_35847325	0.0393661	0.00455421
PHF20	chr20_35871893	0.0185297	0.161572
SOGA1	chr20_36817488	0.0123796	0.516312
RBL1	chr20_37032576	0.0716577	0.000955929
RBL1	chr20_37044034	0.0117401	0.274193
RBL1	chr20_37067133	0.0194654	0.118789
RPN2	chr20_37241399	0.00453881	0.895074
CTNNBL1	chr20_37802801	0.0373567	0.0881552
RALGAPB	chr20_38497518	0.0286569	0.05212
RALGAPB	chr20_38517489	-0.00233596	0.867073
RALGAPB	chr20_38554170	0.0167335	0.307776
RALGAPB	chr20_38562749	-8.08631e-05	0.994824
PTPRT	chr20_42677849	0.106868	0.198862
STK4	chr20_44994993	0.000410834	0.984141
WFDC3	chr20_45787715	0.203766	1.63587e-11
DNTTIP1	chr20_45787715	0.0455713	0.0514931
WFDC3	chr20_45796388	-0.117114	0.00214179
DNTTIP1	chr20_45800995	-0.0305217	0.138117
SNX21	chr20_45842010	0.0320428	0.0924194
ACOT8	chr20_45842010	0.0187234	0.36216
EYA2	chr20_47169102	0.137057	0.0064876
NCOA3	chr20_47623794	0.0513149	0.00134924
NCOA3	chr20_47637800	0.0164952	0.251812
NCOA3	chr20_47652318	0.0257849	0.343788
ARFGEF2	chr20_48998538	-0.0295282	0.215383
ARFGEF2	chr20_49032974	0.0122501	0.454867
CSE1L	chr20_49077146	-0.00142194	0.902616
CSE1L	chr20_49092173	0.0118831	0.594733
STAU1	chr20_49118425	0.00655464	0.741108
STAU1	chr20_49153907	-0.0090992	0.237704
STAU1	chr20_49159149	0.0123032	0.339263
SLC9A8	chr20_49878071	0.0388365	0.0377744
RNF114	chr20_49946261	0.0031097	0.708905
DPM1	chr20_50935244	-0.00489691	0.634236
NFATC2	chr20_51398571	0.0612837	0.0276224
ATP9A	chr20_51669946	-0.0400262	0.135571
ATP9A	chr20_51676218	0.0118326	0.722243
ZNF217	chr20_53571861	0.0223052	0.20185
RAE1	chr20_57367113	0.0568881	0.0344184
NELFCD	chr20_58994563	-0.00205817	0.906401
ATP5F1E	chr20_59028741	0.0374695	0.0485976
ATP5F1E	chr20_59036774	0.00705345	0.795127
PRELID3B	chr20_59036774	0.00358865	0.891441
PRELID3B	chr20_59038650	0.00620405	0.735233
SYCP2	chr20_59864168	-0.167348	0.00130982
SYCP2	chr20_59881510	-0.0955284	0.000114272
LSM14B	chr20_62134475	0.00649473	0.735191
RPS21	chr20_62388291	-0.00940923	0.723874
PRPF6	chr20_64016940	0.0770139	0.00295877
PLCB4	chr20_9380187	0.0382938	0.388459
PLCB4	chr20_9473255	-0.00076584	0.981381
SAMSN1	chr21_14583529	-0.186961	0.0156088
SAMSN1	chr21_14615864	-0.00721547	0.323993
CHODL	chr21_18256493	0.0841004	0.126877
LTN1	chr21_28947613	0.00208048	0.911582
LTN1	chr21_28961416	0.0662216	0.0987843
LTN1	chr21_28966884	0.00681684	0.625948
CCT8	chr21_29063326	0.0452435	0.0222349
TIAM1	chr21_31225657	-0.0235655	0.358199
HUNK	chr21_31940228	0.00674566	0.82588
CFAP298-TCP10L	chr21_32601785	-0.0254512	0.316912
CFAP298-TCP10L	chr21_32607595	-0.0447143	0.00577913
CFAP298	chr21_32607595	-0.0151421	0.055553
CFAP298-TCP10L	chr21_32609763	-0.0235394	0.321119
IL10RB	chr21_33283030	-0.0146029	0.305249
GART	chr21_33535331	0.0207395	0.108541
SON	chr21_33575583	0.0818282	0.0111166
DONSON	chr21_33575583	-0.0359892	0.221056
ITSN1	chr21_33813824	-0.0176051	0.10591
ITSN1	chr21_33886211	-0.0185731	0.138201
CHAF1B	chr21_36387821	-0.0151524	0.297496
TTC3	chr21_37150045	0.0245719	0.213979
TTC3	chr21_37182948	0.104821	0.0713198
ETS2	chr21_38810013	0.0503516	0.0987823
ETS2	chr21_38810126	0.0607077	0.270938
UMODL1	chr21_42129699	0.111328	0.16877
PKNOX1	chr21_43004238	-0.0239977	0.0114985
YBEY	chr21_46283542	-0.098951	0.0144424
MED15	chr22_20564610	0.0465828	0.00161182
NF2	chr22_29655717	0.0134407	0.192878
MTMR3	chr22_29978884	-0.00833451	0.50149
CCDC157	chr22_30376240	-0.00360406	0.699645
RNF215	chr22_30376240	-0.00694357	0.324048
PRR14L	chr22_31688028	-0.0104247	0.457584
DEPDC5	chr22_31815386	-0.00105412	0.882635
SLC5A1	chr22_32086141	0.0627753	0.00643392
APOL1	chr22_36254863	-0.0794748	0.0387417
TNRC6B	chr22_40312456	-0.0318616	0.1751
PARVG	chr22_44193757	-0.0115881	0.515203
TTC38	chr22_46283954	0.0846369	0.0124796
TRMU	chr22_46343392	0.00116399	0.933788
RPL31	chr2_101010882	0.00355219	0.790898
TBC1D8	chr2_101010882	0.000684522	0.960235
RPL31	chr2_101023626	0.0244865	0.375928
TBC1D8	chr2_101023626	0.0100821	0.734963
IL18R1	chr2_102341169	-0.00652186	0.532119
CCDC138	chr2_108846677	-0.0560729	0.0174611
BUB1	chr2_110639661	0.000307751	0.988065
BUB1	chr2_110649392	-0.0136097	0.302456
SLC66A3	chr2_11177720	0.0788429	0.00360388
ROCK2	chr2_11192113	-0.00140608	0.940212
TMEM87B	chr2_112096987	-0.00256209	0.879933
ROCK2	chr2_11211593	0.0504117	0.335746
ROCK2	chr2_11211909	0.010587	0.532085
SLC35F5	chr2_113742700	0.0359103	0.0332136
DDX18	chr2_117821116	0.16632	0.00349384
TMEM177	chr2_119682127	0.026001	0.000116726
TSN	chr2_121763138	-0.00382498	0.604103
TRIB2	chr2_12718273	-0.0215809	0.679609
TMEM163	chr2_134456848	-0.0939992	0.0043783
LRP1B	chr2_140868266	0.118714	0.13374
KYNU	chr2_142918568	-0.00910036	0.499599
ARHGAP15	chr2_143155713	-0.0386027	0.00521516
PRPF40A	chr2_152671387	0.0424128	0.18621
PRPF40A	chr2_152714446	0.0126404	0.318315
NBAS	chr2_15551341	-0.00515249	0.504043
GALNT5	chr2_157295535	0.00512475	0.903951
CYTIP	chr2_157418600	-0.0112445	0.432167
TANC1	chr2_159170503	-0.0212698	0.00263992
PLA2R1	chr2_159987058	0.0295697	0.395983
DPP4	chr2_162020532	-0.0659602	0.253411
DPP4	chr2_162033687	-0.048521	0.0600412
SLC38A11	chr2_164952629	0.11687	0.000401902
SCN9A	chr2_166281811	-0.0448087	0.112823
BBS5	chr2_169499458	0.094154	0.0234788
KLHL23	chr2_169767308	0.0639035	0.00881253
METTL8	chr2_171330752	-0.0164961	0.0846707
DYNC1I2	chr2_171712625	0.0073084	0.542909
DYNC1I2	chr2_171725577	0.00733495	0.270431
PDK1	chr2_172570842	-0.0258361	0.0825893
PDK1	chr2_172586159	-0.0230018	0.268469
MAP3K20	chr2_173239310	0.0300821	0.146799
MAP3K20	chr2_173258645	0.0232589	0.594518
MAP3K20	chr2_173266784	0.00407227	0.635717
CDCA7	chr2_173367297	0.106567	0.0503449
SCRN3	chr2_174399900	0.0163029	0.00480174
HOXD8	chr2_176130955	-0.00243317	0.944602
PLEKHA3	chr2_178499183	-0.000989139	0.927579
TTN	chr2_178804518	-0.0459583	0.00292614
NUP35	chr2_183157617	-0.0994405	0.00349016
GLS	chr2_190910358	0.0174039	0.344769
STAT4	chr2_191146760	-0.0239904	0.0699039
DNAH7	chr2_195897768	0.000557475	0.975168
CCDC150	chr2_196666795	-0.030582	0.284427
SF3B1	chr2_197402516	0.0158874	0.261298
WDR35	chr2_19941850	0.0202616	0.565168
WDR35	chr2_19974409	0.0101951	0.514017
TYW5	chr2_199933368	-0.0423126	0.0837117
ORC2	chr2_200913995	0.00654945	0.271903
CASP8	chr2_201275017	-0.0246455	0.00451805
TRAK2	chr2_201381222	0.0534303	0.00405056
ALS2	chr2_201729207	-0.0305296	0.0464043
ALS2	chr2_201765831	-0.0557272	0.0284723
BMPR2	chr2_202520054	0.014306	0.109502
BMPR2	chr2_202552669	0.0568439	0.0016639
ICA1L	chr2_202811660	-0.00736214	0.46166
ICA1L	chr2_202811797	-0.0431507	0.383693
NBEAL1	chr2_203099734	-0.0392883	0.0289838
NBEAL1	chr2_203137991	-0.0712265	0.0305785
RHOB	chr2_20449173	0.0258029	0.0700956
APOB	chr2_21024879	0.736851	0.019556
CPS1	chr2_210656504	-0.00556468	0.91635
CPS1	chr2_210663104	-0.113046	0.206919
IKZF2	chr2_213008113	-0.00693632	0.415444
BARD1	chr2_214792459	0.00248652	0.826359
ARPC2	chr2_218238591	0.00649169	0.101801
USP37	chr2_218476995	-0.0150544	0.217684
USP37	chr2_218485636	0.00427148	0.291615
DOCK10	chr2_224841907	-0.0285048	0.201613
DOCK10	chr2_224864508	-0.0191051	0.187534
TRIP12	chr2_229840801	0.030737	0.0194499
SP100	chr2_230498538	-0.0309398	0.0797242
PSMD1	chr2_231075582	-0.0160622	0.276302
UGT1A8	chr2_233617578	0.0468087	0.648633
UGT1A8	chr2_233636394	0.0336495	0.725792
UBE2F	chr2_237987853	0.00367466	0.430133
UBE2F	chr2_237990404	0.00130932	0.916263
SCLY	chr2_238082917	-0.0123816	0.591329
TRAF3IP1	chr2_238332805	0.00699715	0.562155
SH3YL1	chr2_242725	-0.13683	6.98402e-05
SH3YL1	chr2_243568	-0.0993991	3.2079e-05
ACP1	chr2_271999	0.00322121	0.642689
SNX17	chr2_27374324	0.014686	0.223571
BABAM2	chr2_28241503	0.0118246	0.428316
DPY30	chr2_31869955	-0.00432558	0.739124
DPY30	chr2_31892149	-0.0171991	0.148347
BIRC6	chr2_32500160	0.0745873	0.014367
BIRC6	chr2_32508277	0.0129303	0.00412226
TTC27	chr2_32758233	0.0242355	0.0209151
LTBP1	chr2_33361398	-0.0209168	0.311023
THUMPD2	chr2_39737067	-0.0135415	0.192439
LRPPRC	chr2_43934716	0.0286292	0.0440548
SRBD1	chr2_45579825	0.0024305	0.87559
EPCAM	chr2_47373743	0.0152317	0.508173
ASB3	chr2_53670759	-0.0110855	0.584267
ASB3	chr2_53809198	-0.0410671	0.0379314
EML6	chr2_54843965	-0.0215219	0.0120923
RPS27A	chr2_55234234	0.0214481	0.469689
CCDC88A	chr2_55332516	0.00499035	0.680759
PAPOLG	chr2_60793918	-0.138361	0.00337734
KIAA1841	chr2_61073422	0.0124084	0.440338
KIAA1841	chr2_61081435	0.00597062	0.590712
KIAA1841	chr2_61092594	0.00604094	0.6774
USP34	chr2_61347875	0.26869	2.62688e-09
FAM161A	chr2_61835959	-0.0210162	0.323816
VPS54	chr2_63983846	0.0390843	0.0144897
AFTPH	chr2_64579411	0.0182258	0.0977917
RAB1A	chr2_65129928	-0.0556824	0.0609482
PNO1	chr2_68162145	0.0145258	0.127479
ASPRV1	chr2_69962200	-0.0290218	0.0168026
CCT7	chr2_73244066	0.0167004	0.0803878
WDR54	chr2_74422795	-0.0348468	0.0105316
MRPL19	chr2_75655031	-0.00526892	0.359601
GCFC2	chr2_75655031	0.00295777	0.65927
MRPL19	chr2_75673575	-0.0225871	0.00992668
REG1A	chr2_79121004	0.00583019	0.972791
DNAH6	chr2_84528873	-0.0323201	0.0206903
DNAH6	chr2_84616868	-0.0493944	0.261581
VAMP5	chr2_85579959	-0.0422539	0.162732
IMMT	chr2_86158561	0.0379654	0.00360536
IMMT	chr2_86166648	0.0491672	0.00023415
RMND5A	chr2_86771529	0.0182879	0.246574
FABP1	chr2_88122982	-0.0612408	0.576326
MRPS5	chr2_95100809	-0.0128818	0.239164
MRPS5	chr2_95117957	-0.00542442	0.71426
MRPS5	chr2_95150273	-0.0148563	0.226836
ITPRIPL1	chr2_96328313	-0.0363573	0.183264
UNC50	chr2_98618120	0.00380351	0.697672
AC079447.1	chr2_99150465	-0.000205358	0.98773
C2orf15	chr2_99150465	0.0222686	0.0505082
AC079447.1	chr2_99171685	-0.0112963	0.776325
TXNDC9	chr2_99319647	0.0290286	0.309036
AC079447.1	chr2_99319803	-0.0199591	0.54147
TXNDC9	chr2_99319803	0.0114349	0.352595
EIF5B	chr2_99378996	0.0118337	0.585431
EIF5B	chr2_99390428	0.00726318	0.490005
FANCD2	chr3_10034325	-0.0158804	0.15748
FANCD2	chr3_10087282	0.00158204	0.813418
FANCD2OS	chr3_10087282	-0.110755	0.0852305
BRK1	chr3_10126203	-0.00267291	0.938442
NXPE3	chr3_101821306	-0.0308215	0.00490275
HHLA2	chr3_108362329	0.10563	0.00798629
GTPBP8	chr3_113000945	-0.0100801	0.287269
AC112128.1	chr3_113409007	-0.00159302	0.894909
SPICE1	chr3_113448002	-0.0161384	0.261492
SPICE1	chr3_113503253	-0.00445632	0.740053
POLQ	chr3_121476457	0.0162163	0.00626529
POLQ	chr3_121483587	0.00380903	0.735679
IQCB1	chr3_121807306	-0.0773037	1.05948e-08
ILDR1	chr3_122001668	-0.0276306	0.165548
PARP9	chr3_122540892	-0.00488271	0.686457
MUC13	chr3_124920328	0.194452	0.0446554
MKRN2OS	chr3_12529922	-0.00888625	0.523851
MKRN2OS	chr3_12532642	0.00552264	0.868427
MRPL3	chr3_131468046	0.00596684	0.743803
DNAJC13	chr3_132450862	0.012218	0.0858096
UBA5	chr3_132672008	-0.0255532	0.126479
CEP70	chr3_138529168	0.0083158	0.519363
XRN1	chr3_142417017	-0.0150202	0.295266
U2SURP	chr3_143055207	0.0306258	0.0445721
EIF2A	chr3_150564276	0.0228602	0.284081
MED12L	chr3_151384999	0.496856	0.00500241
GOLIM4	chr3_168046807	0.0284136	0.174134
TBC1D5	chr3_17258594	0.0413916	0.0525349
NAALADL2	chr3_175471619	0.0647246	0.19829
ACTL6A	chr3_179573508	-0.0100981	0.615925
ACTL6A	chr3_179580797	0.0275655	0.0352044
ACTL6A	chr3_179586468	0.0262058	0.0292821
USP13	chr3_179730279	-0.0468409	0.23305
USP13	chr3_179763951	-0.0111958	0.200188
ABCC5	chr3_183947465	0.0450482	0.0869711
ABCC5	chr3_183959848	0.0437175	0.068718
MAP3K13	chr3_185437643	0.00553854	0.576388
IL1RAP	chr3_190620251	-0.0382395	0.0698475
OPA1	chr3_193648639	0.073167	0.0668187
ATP13A3	chr3_194448083	0.0551645	0.00231996
DLG1	chr3_197065486	0.0432952	0.0106523
TGFBR2	chr3_30650380	0.00160217	0.927321
PDCD6IP	chr3_33835946	0.115346	0.0029255
ITGA9	chr3_37505940	0.0628313	0.304742
ITGA9	chr3_37508537	0.0303667	0.170852
EIF1B	chr3_40310865	0.0019558	0.881924
ULK4	chr3_41681657	-0.0152715	0.363937
ULK4	chr3_41715354	-0.0455636	0.0141134
ANO10	chr3_43565733	0.00106184	0.924759
CSPG5	chr3_47562781	-0.0203551	0.584597
SMARCC1	chr3_47735875	0.00109055	0.934913
SMARCC1	chr3_47738113	0.0590166	0.150802
ATRIP	chr3_48449938	-0.00782958	0.392747
RBM6	chr3_50061561	0.0102437	0.285284
RBM6	chr3_50075157	0.0147637	0.443087
HYAL1	chr3_50301951	-0.104111	0.0901165
EDEM1	chr3_5208278	-0.0313444	0.037311
GNL3	chr3_52691703	0.0189363	0.18132
GNL3	chr3_52693174	0.0330035	0.195158
ASB14	chr3_57276768	-0.118344	0.161248
RPP14	chr3_58310483	-0.0209921	0.0726141
CADPS	chr3_62445713	0.0267994	0.0322581
ADAMTS9	chr3_64604348	-0.050062	0.122012
SLC25A26	chr3_66346344	0.00791237	0.727614
FRMD4B	chr3_69193620	-0.0146044	0.567034
FOXP1	chr3_70959191	0.00366346	0.743104
FOXP1	chr3_71198435	-0.141177	0.0154789
EIF4E3	chr3_71690182	-0.0242212	0.189629
CNTN3	chr3_74521223	0.00812031	0.864169
IL17RC	chr3_9921084	-0.0761294	0.00542383
WDR1	chr4_10097919	0.0137063	0.459728
NFKB1	chr4_102584628	-0.022772	0.111222
MANBA	chr4_102671435	-0.0135305	0.400178
CENPE	chr4_103163609	-0.00369037	0.796555
TET2	chr4_105272497	0.0937756	0.00281847
INTS12	chr4_105897887	-0.0216628	0.461521
MCUB	chr4_109664423	0.00118855	0.933354
ALPK1	chr4_112435134	-0.0120565	0.662492
ZGRF1	chr4_112585730	-0.00307091	0.747474
UGT8	chr4_114665817	-0.000453848	0.980009
METTL14	chr4_118688028	0.00465286	0.350073
SEC24D	chr4_118744174	-0.0792777	0.153785
SEC24D	chr4_118745063	-0.00230382	0.86748
SEC24D	chr4_118752897	-0.0017958	0.889186
PDE5A	chr4_119505944	-0.0857329	0.0759925
TNIP3	chr4_121161222	-0.0803013	0.00311693
BBS7	chr4_121844016	-0.0418601	0.169887
INTU	chr4_127699990	0.00159932	0.924833
HSPA4L	chr4_127803563	-0.033727	0.306033
HSPA4L	chr4_127830621	-0.0258718	0.403598
PLK4	chr4_127893271	-0.00675124	0.595875
PLK4	chr4_127896751	-0.0200088	0.180489
ABHD18	chr4_128011811	-0.0359652	0.0154823
LARP1B	chr4_128075012	-0.0162002	0.160194
SCLT1	chr4_128942895	-0.00235108	0.876307
SLC7A11	chr4_138232385	0.014546	0.775999
NOCT	chr4_139045510	-0.0134487	0.138323
INPP4B	chr4_142208828	-0.0844899	0.00061862
OTUD4	chr4_145112217	-0.00230568	0.761984
OTUD4	chr4_145124972	-0.0111146	0.401493
PRMT9	chr4_147683721	-0.00809536	0.189218
ARHGAP10	chr4_147857535	-0.00666062	0.765022
ARHGAP10	chr4_147906547	-0.0649616	0.0508222
FAM160A1	chr4_151638566	-0.0173881	0.0154935
FAM160A1	chr4_151662756	-0.00318016	0.679694
C4orf46	chr4_158669771	-0.0155362	0.2143
TAPT1	chr4_16188358	-0.00360091	0.81523
TAPT1	chr4_16202601	-0.0163033	0.157569
KLHL2	chr4_165294511	0.0117577	0.358493
KLHL2	chr4_165310847	-0.00714293	0.647578
CPE	chr4_165467674	-0.0252914	0.607617
ANXA10	chr4_168139654	-0.262986	0.213924
DDX60	chr4_168268975	-0.012529	0.727051
SH3RF1	chr4_169156309	-0.0429061	0.0156621
NEK1	chr4_169507184	0.0105462	0.142701
NEIL3	chr4_177353766	0.00484204	0.562478
AGA	chr4_177436361	-0.00543253	0.750461
NCAPG	chr4_17840247	0.0166557	0.287343
LCORL	chr4_17962906	-0.0228752	0.169239
TENM3	chr4_182728874	-0.044804	0.24826
RWDD4	chr4_183646279	-0.0277691	0.144329
PRIMPOL	chr4_184678526	-0.0178568	0.0874066
CENPU	chr4_184731060	-0.0772751	0.00328156
KLKB1	chr4_186228047	-0.52705	0.00801173
KLKB1	chr4_186251180	0.718244	0.0010395
PACRGL	chr4_20704445	-0.0181836	0.10913
SEPSECS	chr4_25159111	-0.00147676	0.883675
TBC1D19	chr4_26735442	-0.0235605	0.103523
STIM2	chr4_27003116	-0.0370776	0.107071
GRK4	chr4_3013743	-0.045638	0.0343436
RGS12	chr4_3428672	-0.0314445	0.361688
ZNF141	chr4_343725	0.00802403	0.423409
ARAP2	chr4_36082300	-0.0532448	0.0124267
ARAP2	chr4_36124977	-0.035465	0.151623
ARAP2	chr4_36160652	0.0073723	0.545906
TBC1D1	chr4_38132803	-0.0116232	0.306422
FAM114A1	chr4_38935696	-0.0419852	0.137962
FAM114A1	chr4_38941077	-0.0180563	0.0951296
WDR19	chr4_39214774	-0.0143653	0.107556
WDR19	chr4_39224867	0.000676723	0.947829
WDR19	chr4_39232100	-0.0122336	0.22554
LIAS	chr4_39477229	-0.0373511	0.0179307
UGDH	chr4_39500103	-0.0250122	0.0401609
PDS5A	chr4_39849439	-0.00288285	0.549138
PDS5A	chr4_39926867	-0.00698381	0.555272
LIMCH1	chr4_41613194	-0.0444409	0.213429
ATP8A1	chr4_42624643	-0.0286551	0.433936
NFXL1	chr4_47854941	0.00082793	0.92178
NFXL1	chr4_47899139	-0.0138518	0.124724
SGCB	chr4_52028636	-0.0549792	0.151818
CEP135	chr4_56011560	-0.0108762	0.1882
ADGRL3	chr4_61909762	-0.0420974	0.000634127
UBA6	chr4_67681515	-0.0160641	0.552895
UBA6	chr4_67696712	-0.0263206	0.450458
YTHDC1	chr4_68337917	0.000295964	0.975979
COX18	chr4_73065173	-0.0267878	0.0403224
EREG	chr4_74384571	0.137029	0.176488
RCHY1	chr4_75517017	-0.0210685	0.0152315
THAP6	chr4_75517017	-0.0133536	0.0808608
CNOT6L	chr4_77773174	-0.0118788	0.222617
CNOT6L	chr4_77776399	-0.0324045	0.0240611
FRAS1	chr4_78407576	-0.0852805	0.0624294
FRAS1	chr4_78521646	-0.0942494	0.00730307
PAQR3	chr4_78926481	-0.0170376	0.167415
ANTXR2	chr4_79984777	0.010062	0.72755
ANTXR2	chr4_80036035	-0.0391814	0.129978
TMEM150C	chr4_82502937	0.00895433	0.642988
SEC31A	chr4_82819011	0.0174868	0.495604
SEC31A	chr4_82864412	0.169471	6.80356e-08
GPAT3	chr4_83598623	0.0092893	0.520404
TRMT44	chr4_8471059	-0.0127316	0.22417
WDFY3	chr4_84773036	-0.0284891	0.0353259
WDFY3	chr4_84789633	-0.00479018	0.213971
WDFY3	chr4_84794752	-0.0648896	0.00217643
HERC6	chr4_88437061	-0.0396757	0.109648
ATOH1	chr4_93830677	-0.139244	0.0633778
PDLIM5	chr4_94586958	-0.000241543	0.975849
EIF4E	chr4_98881150	-0.0235407	0.00799375
EIF4E	chr4_98885065	0.00485693	0.854908
ADH1C	chr4_99339513	0.192356	0.000862125
DAPP1	chr4_99863719	-0.0409517	0.134092
MARCHF6	chr5_10394800	0.00749117	0.38076
FER	chr5_108832743	-0.00388383	0.773232
FER	chr5_108867751	-0.0134766	0.124668
YTHDC2	chr5_113534291	-0.00340628	0.904499
YTHDC2	chr5_113553158	-0.00962228	0.284746
YTHDC2	chr5_113567889	-0.00743876	0.567492
YTHDC2	chr5_113579559	-0.130859	0.0011424
KCNN2	chr5_114404915	0.297947	4.93529e-07
DMXL1	chr5_119165287	-0.0142038	0.0257411
DMXL1	chr5_119240402	-0.0277285	0.0827449
TNFAIP8	chr5_119392801	-0.0195909	0.403924
SNX24	chr5_122946015	0.00266681	0.825502
PRRC1	chr5_127530428	0.0192267	0.391715
SLC12A2	chr5_128186462	0.0598467	0.00774328
RAPGEF6	chr5_131603333	-0.0117001	0.385018
RAD50	chr5_132591859	-0.0426413	0.0727904
VDAC1	chr5_133980635	0.0110969	0.143474
VDAC1	chr5_133981017	0.0437041	0.0197246
CDKL3	chr5_134319339	-0.0111711	0.570283
SAR1B	chr5_134608354	-0.0221405	0.0576222
SEC24A	chr5_134671904	-0.0583365	0.0655807
SEC24A	chr5_134679806	-0.052488	0.0919091
SEC24A	chr5_134697265	0.0196225	0.491417
SEC24A	chr5_134703941	-0.0543419	0.0811747
DNAH5	chr5_13814868	-0.0455291	0.183581
IK	chr5_140651576	0.00926228	0.514061
PCDHGA5	chr5_141415642	-0.04826	0.0648365
DIAPH1	chr5_141527700	0.00774672	0.322825
TRIO	chr5_14388689	0.0101462	0.345612
TRIO	chr5_14485053	0.0212225	0.112181
RBM27	chr5_146267757	0.0833055	0.000296022
STK32A	chr5_147351175	0.167079	0.00615634
DCTN4	chr5_150731327	-0.0640979	0.000502577
TTC1	chr5_160051083	0.00855473	0.562203
GABRB2	chr5_161459858	0.538498	0.0151913
MYO10	chr5_16763617	0.0284264	0.440139
MYO10	chr5_16783515	0.152249	0.0419795
SPDL1	chr5_169593334	-0.0134491	0.322088
GABRP	chr5_170794215	0.0638942	0.586958
ATP6V0E1	chr5_172994758	0.00620694	0.634176
CANX	chr5_179726577	-0.00378805	0.738028
BTNL9	chr5_181054217	-0.0230252	0.252631
DROSHA	chr5_31483647	0.0301055	0.0401156
ZFR	chr5_32404056	0.0979579	0.00350403
SLC1A3	chr5_36629416	-0.00728251	0.698511
SLC1A3	chr5_36629700	-0.0401672	0.109456
NIPBL	chr5_37027475	0.0333123	0.0186867
FYB1	chr5_39119039	-0.020278	0.348073
PAIP1	chr5_43536803	0.0121027	0.268044
PLPP1	chr5_55425792	0.100323	0.0239302
MIER3	chr5_56946817	0.0488122	0.00814679
PDE4D	chr5_58974631	0.0188361	0.239642
PDE4D	chr5_58990911	0.00594683	0.719065
DEPDC1B	chr5_60605866	-0.0192155	0.339804
ERCC8	chr5_60874686	-0.0227323	0.127807
IPO11	chr5_62515619	-0.16442	0.00171594
ADAMTS6	chr5_65333998	-0.0030357	0.464022
CENPK	chr5_65567658	0.00128442	0.879072
SREK1	chr5_66170197	-0.0752714	0.0290091
FAM169A	chr5_74839974	-0.00740437	0.876868
CERT1	chr5_75426481	-0.00740032	0.578444
IQGAP2	chr5_76671690	-0.004401	0.844276
WDR41	chr5_77489582	-0.00734583	0.150751
TMEM161B	chr5_88206509	-0.01571	0.127883
SEMA5A	chr5_9043031	-0.0105317	0.818867
ADGRV1	chr5_90706404	-0.0230765	0.242321
ADGRV1	chr5_91149988	-0.266698	5.15906e-06
TTC37	chr5_95469982	0.0286972	0.00848643
TTC37	chr5_95498628	0.0293809	0.0126036
TTC37	chr5_95507015	0.00978467	0.444235
ARSK	chr5_95567872	-0.0244447	0.0765227
ELL2	chr5_95898092	-0.0156368	0.304288
ERAP2	chr5_96884035	0.156018	2.13914e-13
ERAP2	chr5_96895155	-0.193982	4.89698e-09
CHD1	chr5_98896453	-0.104485	0.0070498
ASCC3	chr6_100540391	-0.0214779	0.152715
HACE1	chr6_104785370	-0.031437	0.000101214
BEND3	chr6_107099237	-0.00667229	0.500521
SEC63	chr6_107901524	-0.00907571	0.583825
SEC63	chr6_107921916	-6.06548e-05	0.996307
AFG1L	chr6_108476763	-0.0317005	0.331644
SESN1	chr6_108998765	-0.0428055	0.439421
RPF2	chr6_111008019	-0.0135441	0.19692
SLC16A10	chr6_111221890	-0.0276963	0.125716
MFSD4B	chr6_111266158	-0.00110272	0.963475
REV3L	chr6_111381246	-0.0304999	0.012427
LAMA4	chr6_112141263	0.0848972	0.0281927
FRK	chr6_115943224	-0.0400029	0.00877192
DCBLD1	chr6_117563399	-0.0490982	0.106902
CEP85L	chr6_118482033	-0.00818434	0.719075
PTPRK	chr6_128009279	0.0425441	0.0133926
PTPRK	chr6_128240165	-0.000193965	0.991267
ENPP3	chr6_131627325	-0.021198	0.68093
ENPP3	chr6_131627677	0.0268047	0.225239
ENPP3	chr6_131718751	0.0380298	0.618874
SLC18B1	chr6_132772093	0.0103193	0.671067
SLC18B1	chr6_132787620	-0.00719333	0.689854
MAP3K5	chr6_136562355	-0.0196033	0.492082
MAP3K5	chr6_136611466	-0.0267251	0.34219
ADGRG6	chr6_142309746	-0.00148682	0.96312
ADGRG6	chr6_142370814	-0.011996	0.6028
ADGRG6	chr6_142438199	0.0455851	0.26211
UTRN	chr6_144482395	-0.0717478	0.00031362
SHPRH	chr6_145935180	-0.0243685	0.0564475
STXBP5	chr6_147334232	-0.0787108	0.0441166
SASH1	chr6_148471378	0.00721912	0.109127
UST	chr6_148953772	-0.0616337	0.00215196
PCMT1	chr6_149773017	0.0238206	0.324429
CCDC170	chr6_151538012	0.0233144	0.158428
SYNE1	chr6_152231570	-0.0165804	0.417195
SYNE1	chr6_152308638	0.000834204	0.930085
SYNE1	chr6_152380928	-0.00954426	0.552333
SYNE1	chr6_152419547	-0.0039233	0.533334
DTNBP1	chr6_15651412	0.021419	0.219696
ZDHHC14	chr6_157628320	-0.00276791	0.831237
SERAC1	chr6_158148993	-0.00914704	0.340898
SOD2	chr6_159736246	-0.038289	0.225876
WTAP	chr6_159742074	-0.0533844	0.0108754
SLC22A3	chr6_160436731	0.0369315	0.211694
MAP3K4	chr6_161102803	-0.000244543	0.966049
PDE10A	chr6_165396475	0.00167224	0.934741
SMOC2	chr6_168549266	0.000326292	0.996973
KIF13A	chr6_17777384	-0.00528323	0.554828
SOX4	chr6_21596270	-0.0120264	0.670396
CARMIL1	chr6_25426413	0.00256658	0.853079
CARMIL1	chr6_25556905	-0.0201767	0.0982367
NQO2	chr6_3006588	-0.0499795	0.0976594
ABCF1	chr6_30578077	0.028005	0.0474958
ABCF1	chr6_30580347	0.00184682	0.915397
ABCF1	chr6_30589603	0.0135707	0.31422
FLOT1	chr6_30740835	0.00562175	0.589486
DDR1	chr6_30891528	0.0341683	0.0255004
NEU1	chr6_31864580	-0.0255183	0.333987
SLC44A4	chr6_31864580	0.0693926	0.0418409
PPT2-EGFL8	chr6_32155564	0.036593	0.00425091
RNF5	chr6_32179515	0.00143573	0.950648
HLA-DQA1	chr6_32642376	0.0207414	0.00741708
SNRPC	chr6_34770223	0.0299366	0.332212
SRPK1	chr6_35842607	0.0215099	0.188196
ETV7	chr6_36391906	-0.00169108	0.953479
KCTD20	chr6_36484827	-0.00858911	0.206827
STK38	chr6_36515205	0.0109101	0.661094
FGD2	chr6_37017105	-0.030637	0.0555176
ZFAND3	chr6_37930036	0.0191872	0.320026
KIF6	chr6_39613112	0.0969292	0.156352
XPO5	chr6_43546791	-9.76862e-05	0.99571
XPO5	chr6_43570765	0.00678456	0.648447
HSP90AB1	chr6_44248808	0.0150097	0.644173
SLC25A27	chr6_46668820	0.029897	0.124394
CDYL	chr6_4943771	0.00545559	0.548297
MMUT	chr6_49447639	0.0314873	4.7665e-06
PKHD1	chr6_51638800	-0.0356596	0.262543
GSTA4	chr6_52982470	-0.118321	0.000845173
BMP5	chr6_55874914	0.106367	0.152123
COL21A1	chr6_56064627	0.475134	0.000100571
COL21A1	chr6_56157073	0.139022	0.0398755
KIAA1586	chr6_57054930	-0.039722	0.0309498
COL19A1	chr6_70130233	0.179663	0.0626356
COL9A1	chr6_70260549	0.0282368	0.543637
COL9A1	chr6_70274186	0.00531602	0.926241
COL9A1	chr6_70281301	0.0755372	0.165825
COL9A1	chr6_70300245	0.146322	0.00063131
SMAP1	chr6_70798667	0.0267447	0.0484758
SMAP1	chr6_70861986	0.0044505	0.7099
SLC17A5	chr6_73600509	-0.0365851	0.103081
DSP	chr6_7582538	0.0418207	0.200293
MYO6	chr6_75890141	0.222427	0.00286837
SNRNP48	chr6_7595009	-0.0267374	0.112275
TENT5A	chr6_81749618	-0.0436519	0.168323
IBTK	chr6_82200557	-0.0290321	0.176067
IBTK	chr6_82220721	-0.0217813	0.00576486
RWDD2A	chr6_83188582	-0.0256268	0.0344975
ME1	chr6_83352146	-0.0652628	0.00298506
CYB5R4	chr6_83940016	-0.0231287	0.0447923
RNGTT	chr6_88853505	-0.012463	0.155548
RNGTT	chr6_88891920	-0.0660518	0.0018102
RNGTT	chr6_88904672	-0.0314667	0.100049
RNGTT	chr6_88929270	-0.0278183	0.00446668
LYRM2	chr6_89629094	-0.0211234	0.0072582
MMS22L	chr6_97168032	0.0105707	0.500116
COQ3	chr6_99369824	-0.0135021	0.390893
TSTD3	chr6_99558420	-0.000839085	0.940897
MCM7	chr7_100099419	0.023012	0.108435
AP4M1	chr7_100105785	0.032102	0.0809524
MOGAT3	chr7_101200089	0.1304	0.162669
CUX1	chr7_102196577	-0.0286138	0.435319
ARMC10	chr7_103086605	-0.00044779	0.965736
KMT2E	chr7_105041051	0.0163996	0.178321
KMT2E	chr7_105107338	0.0166992	0.447782
PUS7	chr7_105482445	-0.00334811	0.818887
SLC26A3	chr7_107767527	0.576414	0.00892927
SLC26A3	chr7_107773862	0.037599	0.849422
PHF14	chr7_11061768	0.0160286	0.160178
DOCK4	chr7_111834694	-0.0247729	0.386516
GPR85	chr7_113084895	-0.0276248	0.0333451
MET	chr7_116769622	0.025011	0.152888
ST7	chr7_116956743	0.136364	0.00180691
ST7	chr7_117138390	-0.014461	0.211036
CFTR	chr7_117548875	0.0738527	0.489107
CFTR	chr7_117610426	0.0841331	0.0650305
COPG2	chr7_130612249	-0.167409	1.759e-06
CUL1	chr7_148797703	0.000656647	0.925892
GIMAP2	chr7_150687106	0.0159028	0.000186181
RHEB	chr7_151502229	0.0311969	0.293235
KMT2C	chr7_152177063	0.0596071	0.0586286
ESYT2	chr7_158793765	0.0461612	0.0248659
SOSTDC1	chr7_16465430	0.109201	0.0443692
BZW2	chr7_16682768	0.00678278	0.7246
NUP42	chr7_23199445	0.025477	0.123298
EIF3B	chr7_2364260	0.0206668	0.372699
EIF3B	chr7_2367103	0.0102093	0.489885
HNRNPA2B1	chr7_26197875	0.0106804	0.590251
CBX3	chr7_26197875	-0.0028963	0.891102
CBX3	chr7_26208365	0.00801777	0.640089
CHN2	chr7_29507148	0.0174159	0.521585
CRHR2	chr7_30655167	0.3523	0.00888157
AVL9	chr7_32553623	-0.023104	0.284652
AVL9	chr7_32554539	0.0507663	0.292034
ANLN	chr7_36427060	-0.111338	0.00266656
VPS41	chr7_38771281	-0.00166252	0.835535
CAMK2B	chr7_44220801	-0.201617	0.00949058
PPIA	chr7_44801187	0.0102053	0.250638
WIPI2	chr7_5199689	0.0142557	0.169142
TNRC18	chr7_5390359	0.00849993	0.606597
VOPP1	chr7_55497555	-0.000121741	0.993554
NIPSNAP2	chr7_55984797	0.0491779	0.0603546
PSPH	chr7_56017420	-0.00443015	0.768181
EIF2AK1	chr7_6024840	0.00165199	0.879624
EIF2AK1	chr7_6037533	0.0453816	0.336324
EIF2AK1	chr7_6041223	-0.0230511	0.354449
PRKAR1B	chr7_607322	-0.002152	0.942173
KDELR2	chr7_6446110	0.00797513	0.645911
CRCP	chr7_66134252	0.000330052	0.983972
ELN	chr7_74065617	-0.00152089	0.962921
SEMA3C	chr7_80797998	0.0642049	0.284909
SEMA3C	chr7_80827393	0.00377943	0.761535
ICA1	chr7_8143998	0.0557507	0.237619
ANKIB1	chr7_92371410	0.00605519	0.801024
ANKIB1	chr7_92391139	-0.00778632	0.548108
SGCE	chr7_94552274	-0.0274938	0.178358
PON3	chr7_95359944	-0.114959	0.00179577
SLC25A13	chr7_96146537	0.0378569	0.0254984
SLC25A13	chr7_96189553	-0.0030201	0.83535
SLC25A13	chr7_96234733	0.0111761	0.554071
SPAG1	chr8_100240858	0.0300906	0.219341
PABPC1	chr8_100712799	0.00395173	0.610631
YWHAZ	chr8_100920796	0.0167094	0.180209
YWHAZ	chr8_100923879	0.0270861	0.264111
UBR5	chr8_102275623	0.00357264	0.820905
UBR5	chr8_102304963	0.0140789	0.27773
KLF10	chr8_102653448	0.0247982	0.56855
DCAF13	chr8_103427259	0.0214253	0.482747
EIF3E	chr8_108234961	0.00914776	0.300007
PKHD1L1	chr8_109493638	-0.374761	0.00521599
RAD21	chr8_116856293	-0.00652652	0.353118
TAF2	chr8_119788453	0.0275667	0.271188
MRPL13	chr8_120443319	0.00787621	0.359659
C8orf76	chr8_123220311	-0.0150805	0.29511
FAM91A1	chr8_123805366	0.0266427	0.119849
ASAP1	chr8_130169104	0.025674	0.0495811
ASAP1	chr8_130180908	0.0302594	0.0124738
VPS37A	chr8_17242944	0.00426167	0.692344
MTUS1	chr8_17647118	-0.00947263	0.769262
DOCK5	chr8_25382611	0.0305737	0.257042
ESCO2	chr8_27780150	-0.00446334	0.875856
PBK	chr8_27833025	0.0409386	0.277215
GTF2E2	chr8_30607203	-0.0150302	0.519287
GSR	chr8_30712093	0.0211154	0.548231
WRN	chr8_31076301	-0.0181993	0.267465
CSMD1	chr8_3188775	-0.129399	0.00203581
TTI2	chr8_33497339	-0.00987075	0.230294
MAK16	chr8_33497339	-0.0205124	0.038011
TTI2	chr8_33498674	0.00375861	0.638551
TTI2	chr8_33499308	0.00109722	0.931382
ADAM9	chr8_39016217	-0.118525	0.0274681
ADAM9	chr8_39054603	-0.00967433	0.370568
ADAM9	chr8_39082625	-0.00259763	0.919575
SLC20A2	chr8_42437613	0.00122689	0.972093
PRKDC	chr8_47819514	0.0192475	0.145635
PRKDC	chr8_47900274	0.0403147	0.180805
PRKDC	chr8_47954350	0.0786442	0.0320845
PRKDC	chr8_47955958	0.0325505	0.400366
ALKAL1	chr8_52539800	0.00034295	0.991165
RB1CC1	chr8_52630531	0.0160979	0.321039
MRPL15	chr8_54137473	0.0397017	0.268207
ASPH	chr8_61583863	0.00946712	0.50801
ASPH	chr8_61626384	-0.0474917	0.082711
ASPH	chr8_61638366	-0.00777391	0.474024
ASPH	chr8_61644637	-0.00563425	0.807479
GGH	chr8_63035627	0.0242726	0.335534
ADHFE1	chr8_66445101	0.325036	1.94844e-05
CSPP1	chr8_67149948	-0.0025466	0.692983
ARFGEF1	chr8_67180024	0.0231402	0.141376
ARFGEF1	chr8_67228149	-0.0281777	0.352576
ARFGEF1	chr8_67302475	0.0183535	0.618252
TRPA1	chr8_72046457	-0.109758	0.0158681
TRPA1	chr8_72057020	-0.145023	0.0916076
RPL7	chr8_73292189	0.0149871	0.237447
CDH17	chr8_94174283	0.0289281	0.351885
RAD54B	chr8_94411324	-0.0285599	0.168145
ESRP1	chr8_94705904	0.00527265	0.523476
DPY19L4	chr8_94781057	0.000404682	0.972526
INTS8	chr8_94849558	0.0447993	0.0050822
TNKS	chr8_9706288	-0.0375942	0.139316
LAPTM4B	chr8_97805325	0.0689717	0.0019387
RPL30	chr8_98042609	0.0100177	0.308919
RAD23B	chr9_107331686	0.0156516	0.0663893
ELP1	chr9_108917468	-0.00379113	0.662626
CDK5RAP2	chr9_120470227	0.0402693	0.00265838
STRBP	chr9_123147678	-0.0033941	0.603182
MAPKAP1	chr9_125565742	0.00417526	0.300197
ZNF79	chr9_127444017	0.0506409	7.57872e-06
TOR1B	chr9_129810336	0.035858	0.000897577
FNBP1	chr9_129895801	0.00717851	0.768864
FNBP1	chr9_129903043	0.00148481	0.943857
FUBP3	chr9_130622843	0.00674699	0.379615
AIF1L	chr9_131120400	-0.255455	0.0112281
CCDC171	chr9_15729858	-0.0538339	0.0353275
DENND4C	chr9_19299212	4.67005e-05	0.998522
DENND4C	chr9_19334960	0.0200507	0.274923
MTAP	chr9_21815591	-0.00461444	0.600619
MTAP	chr9_21861904	-0.0124451	0.324683
C9orf72	chr9_27548436	-0.00215525	0.779457
PUM3	chr9_2812379	0.0595926	0.14422
DDX58	chr9_32481503	-0.020101	0.136778
BAG1	chr9_33262658	-0.059692	0.00199388
UBE2R2	chr9_33912105	0.0224936	0.090589
UBAP1	chr9_34224147	0.00262282	0.932514
MELK	chr9_36671223	-0.0400838	0.0811895
DOCK8	chr9_376187	-0.0480744	0.0289229
FRMPD1	chr9_37733711	0.353842	0.0103981
DOCK8	chr9_432141	-0.0311173	0.133517
JAK2	chr9_5122911	-0.0407365	0.0509282
RIC1	chr9_5738546	-0.0119779	0.128485
GDA	chr9_72231272	-0.0215686	0.398041
VPS13A	chr9_77282303	-0.0275236	0.112049
VPS13A	chr9_77283342	-0.0887144	0.0560219
PTPRD	chr9_8341281	0.100941	0.0178491
HNRNPK	chr9_83978332	0.0015316	0.845675
SLC28A3	chr9_84305203	-0.0708447	0.0294948
CENPP	chr9_92417563	-0.0197052	0.122804
ZNF169	chr9_94301444	-0.00634856	0.625025
PTCH1	chr9_95468643	-0.00414987	0.878677
CTSV	chr9_97036760	-0.0234423	0.706003
CCDC180	chr9_97330067	-0.0189043	0.391695

## Sheet: STAD
gene	str_id	msi_coef	msi_pvalue
CHUK	chr10_100233167	-0.0138445	0.261674
TRUB1	chr10_114975476	-0.0208609	0.208078
PRDX3	chr10_119173610	-0.21839	0.00518612
PRPF18	chr10_13605580	-0.0112666	0.019175
PRTFDC1	chr10_24851485	-0.0204621	0.643715
APBB1IP	chr10_26513705	0.0391613	0.0655016
IPMK	chr10_58252437	-0.0152927	0.133013
SUPV3L1	chr10_69202394	0.0121268	0.567232
TNKS2	chr10_91842189	0.215311	3.6085e-07
KIF11	chr10_92606591	-0.000628134	0.971604
NOC3L	chr10_94349232	-0.024496	0.159907
HELLS	chr10_94558082	-0.0406038	0.148945
ZNF518A	chr10_96159099	-0.154734	0.00116617
CASP5	chr11_105008960	-0.102925	0.0662363
C11orf65	chr11_108317540	-0.00493744	0.768485
DLAT	chr11_112045042	-0.0321045	0.0700754
CEP164	chr11_117351932	0.0486336	0.0197449
VSIG2	chr11_124754810	0.102861	0.0771091
ESAM	chr11_124754810	0.0448908	0.0275867
NCAPD3	chr11_134185531	-0.0545919	0.0432952
NCAPD3	chr11_134194634	-0.00301122	0.852469
NCAPD3	chr11_134202910	0.0123517	0.691421
TNNT3	chr11_1923009	-0.517644	6.63122e-05
MUC15	chr11_26559836	0.0906517	0.0442048
ARFGAP2	chr11_47165521	0.0104368	0.238148
SLC22A9	chr11_63382199	0.0822388	0.582404
LTBP3	chr11_65547349	0.0079477	0.822276
AIP	chr11_67487292	0.204919	0.0317536
NDUFC2	chr11_78073101	0.0967782	0.00227857
CTSC	chr11_88335085	-0.0739561	0.000791159
MRE11	chr11_94479765	0.0535983	0.0117738
RIC8B	chr12_106843837	-0.00371718	0.80463
ACACB	chr12_109264155	0.0250151	0.205117
NAA25	chr12_112078151	-0.0345382	0.0408781
RNF10	chr12_120566762	0.0110877	0.297096
DIABLO	chr12_122216455	-0.0261263	0.370755
DNAH10	chr12_123757912	-0.0588285	0.0140117
SLCO1B1	chr12_21174719	-0.22066	0.00564002
ETFBKMT	chr12_31666254	-0.0532334	0.0891669
PARP11	chr12_3826111	-0.0462438	0.0716432
RAD51AP1	chr12_4535996	-0.0553357	0.0756392
GLS2	chr12_56478987	-0.0174275	0.342948
R3HDM2	chr12_57283738	0.0447772	0.103662
IFNG	chr12_68158262	-0.634655	0.00304981
CNOT2	chr12_70353914	0.0238203	0.0792691
METTL25	chr12_82477232	-0.0235033	0.291501
LRRIQ1	chr12_85229413	0.70298	0.005823
A2M	chr12_9068228	0.0368241	0.272291
CEP83	chr12_94309886	-0.0186502	0.466112
LAMP1	chr13_113310688	0.0329199	0.0122872
NUP58	chr13_25324954	-0.00345158	0.621406
HSPH1	chr13_31148484	0.135227	2.45854e-09
B3GLCT	chr13_31215029	-0.00173628	0.927342
BRCA2	chr13_32333399	-0.0138561	0.363521
FREM2	chr13_38861416	0.0416129	0.399186
ITM2B	chr13_48253967	0.0224822	0.0737161
CAB39L	chr13_49350730	0.0119526	0.8233
KCNRG	chr13_50011916	-0.0922868	0.00647222
MZT1	chr13_72719112	-0.00280279	0.859936
GPR180	chr13_94620988	-0.0138006	0.757941
ABCC4	chr13_95021687	-0.0254461	0.686257
RCOR1	chr14_102726438	-0.00611617	0.625519
SCFD1	chr14_30722463	0.00249055	0.769417
GEMIN2	chr14_39124931	-0.00349474	0.863637
KLHL28	chr14_45028354	-0.0178568	0.443404
KLHL28	chr14_45044624	-0.0712713	0.0248098
L2HGDH	chr14_50294251	-0.0284267	0.0840707
STYX	chr14_52746411	-0.0293354	0.244201
PCNX4	chr14_60150197	-0.00743108	0.193576
FNTB	chr14_65006157	-0.00687092	0.154242
SLC10A1	chr14_69786333	-0.595414	4.49559e-05
SMOC1	chr14_70030203	0.0385629	0.292989
DPF3	chr14_72723737	-0.0190775	0.182891
CEP128	chr14_80526987	-0.0222225	0.102059
TUBGCP5	chr15_23024903	-0.0102982	0.519242
DNAJC17	chr15_40767873	-0.00539681	0.635448
C15orf48	chr15_45432920	-0.137354	0.0447964
CEP152	chr15_48805536	-0.0192747	0.019329
USP8	chr15_50490238	-0.0276615	0.0771681
MYO5C	chr15_52269695	4.72203e-05	0.998091
MYO5C	chr15_52279074	-0.00350802	0.88277
ZNF280D	chr15_56654506	-0.00557124	0.700795
ADAM10	chr15_58682151	0.00747299	0.802488
ADAM10	chr15_58717732	0.00188136	0.972789
FAM81A	chr15_59401771	-0.00508721	0.609506
GTF2A2	chr15_59650605	-0.165581	0.080718
ICE2	chr15_60453583	-0.00949007	0.70014
TLN2	chr15_62748318	-0.00225127	0.86544
TLN2	chr15_62770943	-0.00767308	0.460575
ZWILCH	chr15_66501961	-0.00353585	0.848436
FBXO22	chr15_75913183	0.00209465	0.874145
KNOP1	chr16_19714384	0.117554	4.40055e-05
THUMPD1	chr16_20737963	-0.0568855	0.0723637
CCNF	chr16_2431054	0.0110434	0.741834
IL27	chr16_28501881	-0.298761	0.00103519
FBRS	chr16_30654129	0.0255701	0.0148759
MT1H	chr16_56671044	-0.495195	0.00305214
NAE1	chr16_66850441	-0.011915	0.615989
DUS2	chr16_68054479	0.0969546	5.29067e-05
IL34	chr16_70659970	0.0177849	0.265765
ADAMTS18	chr16_77322414	0.219446	0.00278896
CIBAR2	chr16_85105273	-0.541761	0.0010751
SCO1	chr17_10692990	-0.0521295	0.0541079
CHRNE	chr17_4901885	0.0766628	0.000123045
RPAIN	chr17_5421259	-0.00383449	0.839135
TOM1L1	chr17_54937082	-0.00177664	0.841131
PCTP	chr17_55767468	-0.208167	0.000650218
BRIP1	chr17_61780239	-0.00849444	0.5793
CASKIN2	chr17_75518975	0.0554193	0.0579039
CHD3	chr17_7908559	0.037646	0.0724327
MYH10	chr17_8513689	0.0146633	0.502212
PIAS2	chr18_46844143	-0.0111379	0.511655
PIAS2	chr18_46864254	-0.0575625	0.165435
MYO5B	chr18_49911975	-0.0639849	0.159436
MYO5B	chr18_49992460	-0.00881343	0.882762
SMAD4	chr18_51058486	-0.00058091	0.936253
LMAN1	chr18_59345962	0.332619	1.40749e-10
RELCH	chr18_62275354	-0.0194503	0.200283
TNFRSF11A	chr18_62358226	0.00275339	0.891532
VPS4B	chr18_63396988	-0.0231651	0.0850612
CD226	chr18_69946709	-0.00894091	0.469148
RTTN	chr18_70142397	-0.0207231	0.101557
RAB3D	chr19_11337094	0.0599097	0.00545751
CYP4F12	chr19_15684757	0.0202934	0.00252093
ABHD8	chr19_17301169	0.141099	6.24127e-13
CRTC1	chr19_18747130	0.029597	0.0648722
GARRE1	chr19_34333674	-0.000787288	0.939635
UBA2	chr19_34454427	0.0403564	0.0899483
PIAS4	chr19_4013403	0.183651	0.000421045
STAP2	chr19_4331944	-0.109693	0.00210977
TOMM40	chr19_44903205	0.0771905	7.70959e-06
APOE	chr19_44903205	0.120646	0.00104916
ADGRE1	chr19_6908665	-0.0244503	0.054925
DBT	chr1_100206311	-0.00103315	0.919137
DBT	chr1_100218787	-0.00365468	0.838058
CORT	chr1_10450241	0.717374	0.000137025
WDR47	chr1_108982800	-0.0456626	0.00235607
TMIGD3	chr1_111489033	-0.0977564	3.2515e-07
DDX20	chr1_111760456	-0.00204317	0.875361
DDX20	chr1_111762785	-0.00962035	0.204865
PTPN22	chr1_113857574	-0.147918	0.000252881
TTF2	chr1_117090512	-0.0567635	0.0153136
TNFRSF18	chr1_1204502	-0.470946	1.32598e-05
PRDM2	chr1_13730931	0.0081466	0.378858
POGZ	chr1_151408250	0.0240973	0.120757
POGZ	chr1_151411577	0.00552463	0.633584
GON4L	chr1_155820570	0.0595008	0.0259941
AIM2	chr1_159062697	0.061994	0.337405
TMCO1	chr1_165743314	0.0104924	0.527498
RABGAP1L	chr1_174219094	-0.00608468	0.868586
LAMC1	chr1_183116729	0.084428	0.131484
RO60	chr1_193069047	-0.0828303	0.00594975
ASPM	chr1_197084432	-0.0193666	0.18142
USP48	chr1_21703628	-0.000952621	0.943996
USP48	chr1_21706893	-0.0192243	0.216974
IARS2	chr1_220096085	-0.0635953	0.0171644
IARS2	chr1_220110771	-0.0366953	0.125161
RAB3GAP2	chr1_220196404	0.0371014	0.00341886
TP53BP2	chr1_223796605	0.0255579	0.0952033
LIN9	chr1_226250817	-0.0836293	0.0747401
ARV1	chr1_230995821	0.160364	0.000344991
B3GALNT2	chr1_235470833	-0.0379854	0.108364
LGALS8	chr1_236540518	-0.0493529	0.000134536
ACTN2	chr1_236739233	0.0586017	0.0314847
PHACTR4	chr1_28459219	0.0713316	0.0349789
RNF19B	chr1_32936734	0.00369874	0.815722
IPO13	chr1_43961283	0.0463138	1.71004e-05
EIF2B3	chr1_44941510	0.10335	0.00012385
EFCAB7	chr1_63532656	-0.0078814	0.638885
CACHD1	chr1_64673105	0.00328437	0.859613
LRRC40	chr1_70189299	-0.00241261	0.799009
RERE	chr1_8445685	0.000489766	0.980752
RPF1	chr1_84490479	-0.0359724	0.00962133
COL24A1	chr1_85970275	-0.00184059	0.927541
GLMN	chr1_92297535	0.0141817	0.181514
RPAP2	chr1_92297535	0.0051445	0.491823
POFUT1	chr20_32230695	0.0152702	0.346395
C20orf194	chr20_3318235	1.57794e-05	0.998771
BPIFB1	chr20_33305988	1.42306	0.00211147
NCOA6	chr20_34750523	0.0257202	0.0682501
PHF20	chr20_35842553	0.0334712	0.265521
CTNNBL1	chr20_37802801	0.00350741	0.84911
RALGAPB	chr20_38517489	0.0128878	0.305901
RALGAPB	chr20_38562749	0.0130155	0.657014
RNF24	chr20_3948198	0.0509165	0.0610651
DNTTIP1	chr20_45800995	0.0242373	0.108714
NCOA3	chr20_47637800	-0.00279757	0.837819
NCOA3	chr20_47642168	0.0238327	0.397058
NCOA3	chr20_47653369	0.00798918	0.295949
SLC23A2	chr20_4859245	0.00408522	0.650937
SLC9A8	chr20_49878071	0.115917	0.00415727
LTN1	chr21_28966884	0.0480233	0.00640004
BACH1	chr21_29553533	-0.025718	0.0531384
CHAF1B	chr21_36415275	-0.0359828	0.0651829
PCNT	chr21_46401533	-0.0759566	0.0136818
CCDC157	chr22_30376240	-0.0190705	0.0141626
RNF215	chr22_30376240	-0.0148201	0.0167243
SAMM50	chr22_43972849	0.000557256	0.951774
TTC38	chr22_46283954	-5.61665e-05	0.998037
POLR1B	chr2_112552621	-0.0342991	0.144665
SLC35F5	chr2_113742700	0.10186	2.39024e-06
CFAP221	chr2_119608482	-0.0602228	0.213892
CFAP221	chr2_119647054	0.0612413	0.303247
TRIB2	chr2_12718273	-0.259406	0.0266829
EPC2	chr2_148769252	0.0293309	0.020164
GPD2	chr2_156513507	0.000505832	0.972189
COBLL1	chr2_164694786	0.12657	0.00490668
SCN9A	chr2_166281811	-0.0439937	0.172779
TTN	chr2_178543037	-0.024196	0.10526
HIBCH	chr2_190212936	-0.0612183	0.0835534
NAB1	chr2_190673068	0.00191919	0.876893
PGAP1	chr2_196926620	-0.0782233	0.00193607
WDR12	chr2_202952535	-0.0029032	0.831326
CYP20A1	chr2_203292246	-0.0164112	0.510214
ILKAP	chr2_238173501	0.0245812	0.000380151
NRBP1	chr2_27436955	0.0194544	0.117356
PLEKHH2	chr2_43700660	0.089626	0.100824
SRBD1	chr2_45579825	-0.00732349	0.541353
MTIF2	chr2_55263872	-0.00892318	0.611194
UGP2	chr2_63885573	0.0750663	2.21839e-05
C2orf42	chr2_70229321	0.00986833	0.402353
DQX1	chr2_74527692	-0.0346511	0.585844
CD8B	chr2_86822236	-0.0587154	0.0275623
AC079447.1	chr2_99150465	-0.0153936	0.314605
AC079447.1	chr2_99171685	-0.0239934	0.412222
AC079447.1	chr2_99319803	-0.0145445	0.477687
MYH15	chr3_108456888	0.00562396	0.902866
GTPBP8	chr3_113000945	-0.00782362	0.428916
IQCB1	chr3_121807306	-0.0570099	0.00448684
KALRN	chr3_124446612	0.22381	0.0347324
UMPS	chr3_124742049	-0.0262883	0.010504
ESYT3	chr3_138474184	-0.00518476	0.826276
GFM1	chr3_158690142	-0.00721848	0.497965
TRIM59	chr3_160438580	0.00455757	0.887243
NMD3	chr3_161238095	-0.0253144	0.0506162
NMD3	chr3_161242681	-0.111987	0.00904215
SLITRK3	chr3_165187861	0.305998	0.00646889
TTC14	chr3_180603110	-0.0050258	0.835179
THRB	chr3_24228922	0.0525684	0.138956
NGLY1	chr3_25719647	0.0142537	0.493787
TGFBR2	chr3_30650380	0.0438172	0.286226
SCN11A	chr3_38863337	0.324129	0.0123324
SCN11A	chr3_38896809	0.110742	0.0511207
SLC25A38	chr3_39396212	-0.0369774	0.263006
CCDC13	chr3_42758063	-0.0456788	0.0113849
ZNF660	chr3_44580468	-0.161172	0.000798163
ZNF197	chr3_44580468	-0.105837	0.00015589
LARS2	chr3_45458687	-0.0271353	0.00882837
ATRIP	chr3_48449938	-0.00801976	0.137375
CCDC66	chr3_56619255	-0.0824788	0.0158735
RPP14	chr3_58310483	0.00366387	0.795498
ROBO2	chr3_77522652	-0.945222	1.02733e-05
RIOX2	chr3_97950910	-0.0155567	0.628107
CENPE	chr4_103145020	-0.0116873	0.352365
HADH	chr4_108014613	0.0187608	0.217021
ETNPPL	chr4_108748164	0.493295	0.00291946
CCNA2	chr4_121817699	-0.0209908	0.676191
PLK4	chr4_127893271	0.0113843	0.33093
MFSD8	chr4_127930820	-0.0468581	0.0890357
OTUD4	chr4_145124972	-0.0536142	0.0855986
OTUD4	chr4_145155481	-0.00313651	0.864066
SMAD1	chr4_145554092	-0.0147697	0.0579141
CPE	chr4_165467674	-0.0154217	0.677225
NEIL3	chr4_177353766	-0.00932076	0.475194
NCAPG	chr4_17840247	-0.00568308	0.854387
RWDD4	chr4_183646279	-0.0168948	0.424464
FAT1	chr4_186639707	-0.0434128	0.438658
ZCCHC4	chr4_25314016	0.00815292	0.043198
KLHL5	chr4_39075948	0.032535	0.432981
ATP8A1	chr4_42590919	-0.11787	0.00230477
ATP8A1	chr4_42624643	-0.0445524	0.188436
NFXL1	chr4_47884305	-0.0132628	0.576657
SPATA18	chr4_52062187	-0.00049156	0.980747
FIP1L1	chr4_53399717	-0.0211825	0.181406
JAKMIP1	chr4_6084968	-0.0862146	0.00955223
UBA6	chr4_67681515	-0.0418406	0.20042
GRSF1	chr4_70827778	-0.00373303	0.773106
PAQR3	chr4_78926481	-0.014344	0.362397
SEC31A	chr4_82861615	0.236563	0.00957377
SEC31A	chr4_82863397	-0.00392007	0.927553
SEC31A	chr4_82864412	0.252352	8.2854e-13
COPS4	chr4_83049145	-0.0095184	0.357678
TRMT44	chr4_8471059	-0.00308093	0.877604
SMARCAD1	chr4_94284949	-0.0284095	0.369088
RAP1GDS1	chr4_98418644	-0.0196398	0.46034
EIF4E	chr4_98881150	-0.0187171	0.153997
WDR36	chr5_111102302	-0.0392673	0.050015
SLC12A2	chr5_128186462	0.00691852	0.856024
CATSPER3	chr5_134970163	-0.0101602	0.551798
BRD8	chr5_138171174	-0.0458143	0.114913
BRD8	chr5_138171416	-0.027014	0.0331135
HARS2	chr5_140696829	-0.00148035	0.749253
PCDHGA1	chr5_141433209	-0.110681	0.0268244
PCDHGA2	chr5_141433209	-0.0987826	0.00489274
PCDHGB2	chr5_141433209	-0.10719	0.00690018
PCDHGA5	chr5_141433209	-0.0951651	0.0184249
PCDHGB3	chr5_141433209	-0.0913256	0.0188957
PCDHGA6	chr5_141433209	-0.0646095	0.0163927
TRIO	chr5_14388689	0.0038042	0.650712
TRIO	chr5_14390881	0.0341046	0.137069
TRIO	chr5_14485053	-0.0126288	0.417947
SH3RF2	chr5_146055957	-0.0665989	0.268925
RETREG1	chr5_16474671	0.0150766	0.524976
MYO10	chr5_16763617	0.128459	0.0601424
ZNF354A	chr5_178713630	-0.0483495	0.0947862
SLC1A3	chr5_36629700	-0.0171501	0.49963
NIPBL	chr5_37051760	0.0701389	0.0827798
MTREX	chr5_55307417	-0.0579701	0.00109831
DEPDC1B	chr5_60605866	0.0298249	0.411101
NLN	chr5_65792661	-0.0080089	0.767402
ERBIN	chr5_66076966	0.0163831	0.500897
CDK7	chr5_69269159	0.0001242	0.99403
CERT1	chr5_75426481	-0.0329176	0.0654584
WDR41	chr5_77489582	-0.0139913	0.0269461
TTC37	chr5_95507015	0.0581272	0.00120885
SEC63	chr6_107921916	0.0220857	0.308686
SESN1	chr6_108998765	0.0605768	0.130751
FIG4	chr6_109727287	-0.00890661	0.29664
LAMA4	chr6_112141263	0.0754457	0.00295954
MARCKS	chr6_113860034	0.0774282	0.136735
KPNA5	chr6_116705055	-0.0300365	0.200077
IL20RA	chr6_137004765	-0.0206048	0.466189
FOXF2	chr6_1394673	0.126526	0.180047
PDE10A	chr6_165396475	-0.0235603	0.47531
RPS6KA2	chr6_166418093	0.00302266	0.836106
TPMT	chr6_18147925	-0.0193368	0.471972
SCGN	chr6_25689151	0.271371	0.0854317
ABCF1	chr6_30578077	0.0888179	0.000557642
PPP1R10	chr6_30605861	0.0323388	0.0136244
C6orf136	chr6_30651509	-0.0177733	0.0417994
AGPAT1	chr6_32179515	0.0154949	0.497664
RNF5	chr6_32179515	0.0163972	0.564007
DST	chr6_56639680	0.03123	0.495753
IMPG1	chr6_76018867	-0.0230977	0.213069
BCKDHB	chr6_80127526	-0.0191618	0.437364
BCKDHB	chr6_80200906	-0.0201786	0.208874
CYB5R4	chr6_83940496	-0.0308053	0.0883568
AL049697.1	chr6_87511380	-0.09708	0.195612
SLC35A1	chr6_87511380	-0.107419	0.00125458
MMS22L	chr6_97168032	-0.0159144	0.457198
COQ3	chr6_99369824	-0.000252454	0.988894
TSTD3	chr6_99558420	-0.0234505	0.203837
CUX1	chr7_102104314	0.0160529	0.316239
POLR2J	chr7_102473111	0.144851	0.000336961
SLC26A5	chr7_103362795	0.236193	0.00388777
SLC26A4	chr7_107683127	-0.24358	3.67918e-05
NRCAM	chr7_108234700	0.00492719	0.939692
ATP6V0A4	chr7_138769148	0.15583	0.00199984
NUB1	chr7_151349027	-0.0132765	0.574562
VOPP1	chr7_55497555	0.0226485	0.276855
HIP1	chr7_75556687	-0.0141994	0.401892
POR	chr7_75943954	0.079149	0.115007
ELAPOR2	chr7_86893105	0.0602396	0.0694724
PON3	chr7_95359944	0.0901043	0.0364134
SLC25A13	chr7_96146537	0.0545869	0.00104252
SLC25A13	chr7_96189553	0.0095142	0.428324
LONRF1	chr8_12740808	-0.0653458	0.0427138
ASAP1	chr8_130180908	0.0244463	0.0998145
SLC7A2	chr8_17548859	0.256497	0.112349
ESCO2	chr8_27780150	0.00218961	0.946323
INTS9	chr8_28850106	-0.0173389	0.180187
RBPMS	chr8_30547275	0.0650688	0.261582
GSR	chr8_30712093	0.00978841	0.661982
ERLIN2	chr8_37753897	-0.0258382	0.247945
ADAM9	chr8_39082625	-0.0331366	0.294531
GOLGA7	chr8_41497463	-0.0757825	0.0493132
ASPH	chr8_61638366	0.0081773	0.691895
ASPH	chr8_61644637	-0.0989959	0.0796583
MTFR1	chr8_65724205	-0.0615743	0.242666
SGK3	chr8_66847177	0.000294544	0.983453
CSPP1	chr8_67149948	-0.00202967	0.717699
IL7	chr8_78717504	-0.0082964	0.506144
CA13	chr8_85268678	0.0417894	0.262765
RNF20	chr9_101544707	0.0221295	0.0642398
GPR21	chr9_123029318	0.256584	0.0117136
SCAI	chr9_125003575	-0.00543856	0.727839
SNAPC3	chr9_15458083	-0.0550896	0.010297
CCDC171	chr9_15727846	-0.0321692	0.256646
MTAP	chr9_21861904	-0.0279371	0.335969
DMRTA1	chr9_22451040	0.123464	0.38408
VCP	chr9_35059650	0.111252	0.00555594
RECK	chr9_36109843	0.0153186	0.0985864

## Sheet: UCEC
gene	str_id	msi_coef	msi_pvalue
NRAP	chr10_113620721	0.180674	0.0125694
PRTFDC1	chr10_24851485	0.0565323	0.321259
TFAM	chr10_58388810	0.13655	7.71922e-08
PALD1	chr10_70529209	0.0361544	0.0434209
RNLS	chr10_88274911	0.0737907	0.178419
LIPJ	chr10_88602551	0.143999	0.176771
TNKS2	chr10_91842189	0.0833459	0.00241269
CEP164	chr11_117351932	0.0653212	0.00176797
CEP164	chr11_117390637	0.0421343	0.00708995
TRAPPC4	chr11_119018676	0.0517849	1.00044e-13
MRE11	chr11_94479765	0.0754356	0.000165963
UHRF1BP1L	chr12_100102701	-0.01426	0.0891895
TESPA1	chr12_54961093	-0.0943651	0.00357222
MARK3	chr14_103498471	0.0177794	0.0133674
AL139353.1	chr14_31350761	-0.219374	0.000160019
TTC6	chr14_37792253	0.78343	0.000309451
COX16	chr14_70326299	-0.0139433	0.352242
RIOX1	chr14_73493000	0.00662688	0.52681
GTF2A1	chr14_81180403	0.134225	0.000105584
GALC	chr14_87988526	0.226434	0.00141856
NEO1	chr15_73126401	0.0520597	0.105296
NEO1	chr15_73135864	0.079748	0.00897268
IREB2	chr15_78498394	-0.0628304	0.0113344
FAHD1	chr16_1837877	-0.114519	2.84097e-18
SDF2	chr17_28661084	0.00867675	0.367201
NSF	chr17_46755723	-0.0199546	0.0667154
ZFP3	chr17_5093176	-0.00406011	0.891651
LMAN1	chr18_59345962	0.144271	6.04542e-06
SPC24	chr19_11147909	0.0184162	0.000172823
GPATCH1	chr19_33129950	0.0218659	0.0278459
UBA2	chr19_34454427	0.0597893	0.000555613
UBA2	chr19_34460452	0.0106995	0.35697
ALDH9A1	chr1_165665136	-0.102909	0.00226857
ZBTB41	chr1_197181120	-0.0887508	0.00760095
IARS2	chr1_220096085	-0.044073	0.0256799
IARS2	chr1_220110771	-0.0468464	0.0114775
KCNK1	chr1_233671922	-0.142357	0.00575489
ZMYM4	chr1_35419437	0.0251566	0.0604189
TLCD4	chr1_95150193	-0.053354	0.0031052
PSMF1	chr20_1146291	0.0261495	0.0184999
NINL	chr20_25452812	0.022486	0.128587
CDK5RAP1	chr20_33367014	0.0161566	0.214299
RALGAPB	chr20_38517489	0.010144	0.290617
RALGAPB	chr20_38562749	0.0127807	0.365855
TFAP2C	chr20_56638265	0.167568	0.0084147
ATP5F1E	chr20_59028741	0.0192985	0.523537
ATP5F1E	chr20_59036774	0.0366708	0.0424941
LTN1	chr21_28966884	0.0451832	0.000630851
HMGN1	chr21_39345111	-0.0105826	1.02008e-06
TAFA5	chr22_48750155	0.941135	7.56472e-05
RAB3GAP1	chr2_135129945	0.0158859	0.118985
DYNC1I2	chr2_171690252	0.150705	0.00158656
SPAG16	chr2_213930215	0.0817363	0.0238044
THADA	chr2_43566825	0.0203024	0.0929222
PPM1B	chr2_44209432	0.228479	0.000364637
MSH6	chr2_47805602	0.0194613	0.0570875
MEIS1	chr2_66568967	0.0616447	0.219972
TXNDC9	chr2_99319803	0.0360641	0.0011672
SENP7	chr3_101459058	0.0495019	0.00318343
MBD4	chr3_129436701	0.12462	0.00876441
IFT122	chr3_129450012	0.0347176	0.00123537
PRKCI	chr3_170275188	0.040376	0.0430872
FXR1	chr3_180961448	0.0335433	0.0768255
FXR1	chr3_180975428	0.0198969	0.0875684
RFC4	chr3_186804505	0.0507251	0.00572846
THRB	chr3_24228922	0.0639336	0.158297
MLH1	chr3_36990443	0.00141253	0.949597
ANO10	chr3_43605721	0.204873	3.29999e-06
ZKSCAN7	chr3_44565329	0.0959744	0.0140411
RBM6	chr3_50061561	0.0107477	0.274538
MTMR14	chr3_9688839	0.0298542	0.00438265
BRPF1	chr3_9747874	0.0332638	0.0413002
CAMK2D	chr4_113661778	-0.0600549	0.0261777
AGA	chr4_177436361	0.105164	0.00019668
PDS5A	chr4_39926867	-0.0133858	0.353414
UCHL1	chr4_41261702	0.154835	0.00835129
SEC31A	chr4_82864412	0.208504	2.26823e-11
PDLIM5	chr4_94586958	-0.0152561	0.180457
PRRC1	chr5_127530428	-0.0319602	0.0411693
PRELID2	chr5_145822996	-0.12811	3.07635e-09
TAF9	chr5_69371437	-0.0454009	0.00886906
ANKRD31	chr5_75210874	0.788306	1.79167e-06
TTC37	chr5_95507015	0.0971168	0.000432114
ERAP1	chr5_96783818	0.0262486	0.00031449
ERAP2	chr5_96895155	-0.171692	1.74941e-12
HDAC2	chr6_113970938	-0.201546	0.000573666
NT5DC1	chr6_116106344	-0.0196194	0.120827
ABCF1	chr6_30578077	0.168263	3.61244e-08
KLC4	chr6_43054239	0.0319175	0.084043
SMAP1	chr6_70798667	0.12967	0.000111968
RELN	chr7_103478277	0.139581	0.0246541
ATXN7L1	chr7_105875628	0.0699711	9.59094e-05
WIPI2	chr7_5199689	0.0131743	0.206126
VOPP1	chr7_55497555	0.0194766	0.209659
CASD1	chr7_94528274	-0.0439333	0.00801488
NPTX2	chr7_98629437	0.0364858	0.57142
EXT1	chr8_117799568	0.0524203	0.0262153
NTAQ1	chr8_123436665	0.0268041	0.000378929
KIF13B	chr8_29204771	-0.0343371	0.293213
ADAM32	chr8_39118062	0.00251226	0.874224
PRKDC	chr8_47954350	0.244907	1.61919e-06
ASPH	chr8_61579910	-0.0214643	0.262567
ASPH	chr8_61583863	-0.0350435	0.019421
LAPTM4B	chr8_97805325	0.0273468	0.0925559
SHOC1	chr9_111758199	0.376187	0.00198522
DCAF10	chr9_37819179	-0.0598384	9.99338e-07
FAM120AOS	chr9_93447701	-0.021651	0.154142
FAM120A	chr9_93447701	-0.0286845	0.0634679
