# Supplementary material for: Multicancer analyses of short tandem repeat variations reveal shared gene regulatory mechanisms
Source: Research Square preprint supplement (doi:10.21203/rs.3.rs-5775561/v1), 2025-01-09
Supplement: Supplementary file 5 [file additional_file_5.xlsx]

## Sheet: CRC
gene	str_id	cg	coef	intercept	p_value	adj_p
CARMIL1	chr6_25426413	cg00000721	0.0369211	0.948851	0.0131223	0.06435
CARMIL1	chr6_25556905	cg00000721	0.00212154	1.57855	0.883488	0.942478
CARMIL1	chr6_25426413	cg00229257	0.0231506	-1.91734	0.00344543	0.0248375
CARMIL1	chr6_25556905	cg00229257	0.0150966	-1.87372	0.0234804	0.0969243
CARMIL1	chr6_25426413	cg03048354	0.0234667	-1.29467	0.000900128	0.00932081
CARMIL1	chr6_25556905	cg03048354	0.0214548	-1.35177	0.000539245	0.00642466
CARMIL1	chr6_25426413	cg03262105	0.00263766	-1.38458	0.764706	0.877915
CARMIL1	chr6_25556905	cg03262105	0.00229285	-1.41237	0.773785	0.883053
CARMIL1	chr6_25426413	cg03372385	-0.0419567	1.08848	0.00113074	0.0110299
CARMIL1	chr6_25556905	cg03372385	-0.0330254	1.03665	0.00155577	0.0139241
CARMIL1	chr6_25426413	cg03547267	0.0321051	0.991373	0.0166001	0.0760625
CARMIL1	chr6_25556905	cg03547267	0.0178926	1.10759	0.121062	0.291263
CARMIL1	chr6_25426413	cg04682791	0.0194708	-0.759158	0.0237215	0.0976171
CARMIL1	chr6_25556905	cg04682791	0.0110724	-0.659851	0.174339	0.365601
CARMIL1	chr6_25426413	cg09110394	0.0383202	-0.271031	0.00032968	0.00442656
CARMIL1	chr6_25556905	cg09110394	0.00297056	0.251797	0.74951	0.869136
CARMIL1	chr6_25426413	cg09322984	0.0293341	-1.04038	1.0208e-06	4.84399e-05
CARMIL1	chr6_25556905	cg09322984	0.0178313	-0.892853	0.000730458	0.00804664
CARMIL1	chr6_25426413	cg11784243	0.0353647	-0.45592	0.0561267	0.17574
CARMIL1	chr6_25556905	cg11784243	0.0432785	-0.668238	0.00837087	0.0468312
CARMIL1	chr6_25426413	cg11924638	0.0236765	0.189507	0.0704781	0.204812
CARMIL1	chr6_25556905	cg11924638	0.000958926	0.516585	0.928803	0.966149
CARMIL1	chr6_25426413	cg13089568	0.036083	0.487928	0.00705504	0.0415813
CARMIL1	chr6_25556905	cg13089568	0.0175153	0.720781	0.128853	0.302343
CARMIL1	chr6_25426413	cg13261390	0.0361266	0.431092	0.00488016	0.0318639
CARMIL1	chr6_25556905	cg13261390	0.0324445	0.356043	0.00402712	0.0278496
CARMIL1	chr6_25426413	cg17031967	0.0324049	0.354032	0.0378394	0.134307
CARMIL1	chr6_25556905	cg17031967	0.0136639	0.49104	0.32342	0.535369
CARMIL1	chr6_25426413	cg17037491	0.0137075	-0.784436	0.063131	0.190701
CARMIL1	chr6_25556905	cg17037491	0.00479004	-0.64091	0.487489	0.683527
CARMIL1	chr6_25426413	cg18128312	0.0467341	0.30445	0.000230863	0.0033745
CARMIL1	chr6_25556905	cg18128312	0.0347216	0.340117	0.0012277	0.0116616
CARMIL1	chr6_25426413	cg19707834	0.0223726	0.424716	0.0999672	0.256379
CARMIL1	chr6_25556905	cg19707834	0.032886	0.169508	0.00730544	0.0426597
CARMIL1	chr6_25426413	cg20955831	0.0174923	-1.00363	0.0135681	0.0658001
CARMIL1	chr6_25556905	cg20955831	0.0146298	-0.978738	0.0203757	0.0878875
CARMIL1	chr6_25426413	cg21272716	0.0319481	0.222151	0.0754201	0.214172
CARMIL1	chr6_25556905	cg21272716	0.00867854	0.642175	0.540683	0.725321
CARMIL1	chr6_25426413	cg21668832	-0.00556268	-0.507661	0.605855	0.773592
CARMIL1	chr6_25556905	cg21668832	-0.0035278	-0.517723	0.702669	0.839573
CARMIL1	chr6_25426413	cg22532997	0.0155107	-0.936086	0.0365921	0.131452
CARMIL1	chr6_25556905	cg22532997	0.0081866	-0.819394	0.241194	0.447663
CARMIL1	chr6_25426413	cg23257561	-0.0396414	1.25923	0.394631	0.603186
CARMIL1	chr6_25556905	cg23257561	-0.0124785	0.948013	0.540217	0.724912
CARMIL1	chr6_25426413	cg23456851	-0.00881326	-1.68756	0.664404	0.814299
CARMIL1	chr6_25556905	cg23456851	-0.0156519	-1.58214	0.377412	0.586452
CARMIL1	chr6_25426413	cg23737208	0.0173666	0.92525	0.193045	0.389859
CARMIL1	chr6_25556905	cg23737208	0.00891992	1.0183	0.448637	0.650405
CARMIL1	chr6_25426413	cg24004055	0.0270809	-2.08363	0.0136186	0.0659587
CARMIL1	chr6_25556905	cg24004055	0.0120157	-1.8686	0.211844	0.413289
CARMIL1	chr6_25426413	cg26692873	0.0271697	0.415475	0.0274945	0.107727
CARMIL1	chr6_25556905	cg26692873	0.0210237	0.451001	0.0577058	0.178885
CARMIL1	chr6_25426413	ch_6_626543F	0.0178069	-0.889003	0.0192466	0.0845556
CARMIL1	chr6_25556905	ch_6_626543F	0.00975047	-0.783015	0.12581	0.298164
FAM81A	chr15_59514275	cg00000905	0.0159653	-0.754956	0.0943007	0.246816
FAM81A	chr15_59514275	cg02454802	0.0504065	-0.16585	0.0601293	0.184224
FAM81A	chr15_59514275	cg02473288	0.0306467	-1.57605	0.0410811	0.14193
FAM81A	chr15_59514275	cg03846129	0.0312266	-2.15386	0.203908	0.403072
FAM81A	chr15_59514275	cg04099524	0.0360022	-1.08322	0.00514399	0.0330485
FAM81A	chr15_59514275	cg05061769	0.0789887	-0.300805	0.000154027	0.00249984
FAM81A	chr15_59514275	cg05178734	-0.0440277	0.210863	0.00120962	0.0115527
FAM81A	chr15_59514275	cg05841929	-0.00400658	-0.0662304	0.814674	0.905157
FAM81A	chr15_59514275	cg06273763	0.0266577	-0.734346	0.00161592	0.0143274
FAM81A	chr15_59514275	cg07488684	-0.0201886	-0.532939	0.400056	0.60826
FAM81A	chr15_59514275	cg07684353	0.0284756	-0.861782	0.00069828	0.00776406
FAM81A	chr15_59514275	cg08454546	-0.117017	1.74559	0.0047495	0.0312616
FAM81A	chr15_59514275	cg08513681	0.0338763	-0.87834	3.64305e-06	0.000135791
FAM81A	chr15_59514275	cg12497187	-0.0602631	1.62904	0.00508164	0.0328125
FAM81A	chr15_59514275	cg12556586	0.0261404	0.737923	0.149181	0.3317
FAM81A	chr15_59514275	cg13331940	-0.0360982	-1.79712	0.232886	0.438423
FAM81A	chr15_59514275	cg16379311	0.024676	-0.808094	0.00877949	0.048429
FAM81A	chr15_59514275	cg18262212	0.031962	-1.91568	0.0432558	0.147215
FAM81A	chr15_59514275	cg18858542	0.0470103	-1.27286	6.41792e-05	0.00128869
FAM81A	chr15_59514275	cg22068529	0.0112607	-1.37991	0.28418	0.495246
FAM81A	chr15_59514275	cg22550075	0.0260195	-0.811313	0.000651296	0.00738711
FAM81A	chr15_59514275	cg22687244	0.046491	0.179566	0.044395	0.149857
FAM81A	chr15_59514275	cg25273520	-0.0248422	1.11199	0.298026	0.508781
FAM81A	chr15_59514275	cg25489866	-0.302264	2.89248	9.61073e-07	4.63989e-05
FAM81A	chr15_59514275	cg25980168	0.117542	-0.431575	8.83691e-07	4.33542e-05
FAM81A	chr15_59514275	cg26189873	0.0338307	-1.11135	0.00154387	0.0138475
FAM81A	chr15_59514275	cg26238644	0.0131646	-0.845459	0.218796	0.4219
FAM81A	chr15_59514275	cg26315263	0.0493065	-1.25056	0.00016259	0.00259025
FAM81A	chr15_59514275	cg27299024	-0.0090824	1.45902	0.663371	0.813751
ROCK2	chr2_11192113	cg00001594	0.00362442	-1.43513	0.761071	0.875684
ROCK2	chr2_11211593	cg00001594	-0.00578963	-1.34482	0.860536	0.930299
ROCK2	chr2_11211909	cg00001594	-0.0114874	-1.2366	0.222982	0.426684
ROCK2	chr2_11192113	cg02916525	-0.0197496	1.00811	0.417311	0.622856
ROCK2	chr2_11211593	cg02916525	-0.00847014	0.855785	0.897597	0.950468
ROCK2	chr2_11211909	cg02916525	-0.0300003	1.20689	0.124033	0.295687
ROCK2	chr2_11192113	cg03997139	-0.0171408	-0.375397	0.288544	0.499553
ROCK2	chr2_11211593	cg03997139	-0.0105993	-0.475143	0.816733	0.906521
ROCK2	chr2_11211909	cg03997139	-0.0138811	-0.360775	0.269762	0.480013
ROCK2	chr2_11192113	cg04779211	0.0255571	-0.940474	0.0151263	0.0713015
ROCK2	chr2_11211593	cg04779211	0.0448229	-1.07907	0.130464	0.304406
ROCK2	chr2_11211909	cg04779211	0.0193183	-0.934521	0.0185894	0.0824678
ROCK2	chr2_11192113	cg04789968	0.00656033	1.53487	0.743176	0.864862
ROCK2	chr2_11211593	cg04789968	-0.034512	1.90955	0.540235	0.724912
ROCK2	chr2_11211909	cg04789968	0.00725847	1.48644	0.660815	0.812137
ROCK2	chr2_11192113	cg07475692	0.0322062	-0.824311	1.84656e-05	0.00048936
ROCK2	chr2_11211593	cg07475692	0.0226695	-0.691282	0.284235	0.495297
ROCK2	chr2_11211909	cg07475692	0.0214077	-0.782616	0.000534501	0.00638677
ROCK2	chr2_11192113	cg07622575	-0.018589	0.216744	0.672595	0.820082
ROCK2	chr2_11211593	cg07622575	-0.157719	1.41564	0.199762	0.397947
ROCK2	chr2_11211909	cg07622575	-0.0285043	0.410283	0.427641	0.632462
ROCK2	chr2_11192113	cg09217581	-0.0134218	-1.45058	0.422343	0.627595
ROCK2	chr2_11211593	cg09217581	0.0255319	-1.81933	0.582852	0.757645
ROCK2	chr2_11211909	cg09217581	0.00831097	-1.69679	0.537417	0.72242
ROCK2	chr2_11192113	cg11796910	0.0409437	0.393512	0.0735092	0.210544
ROCK2	chr2_11211593	cg11796910	0.15364	-0.555764	0.0178874	0.0802079
ROCK2	chr2_11211909	cg11796910	0.00113996	0.787119	0.951697	0.97743
ROCK2	chr2_11192113	cg12346012	-0.00131856	0.945445	0.953508	0.978254
ROCK2	chr2_11211593	cg12346012	-0.0277506	1.17681	0.664559	0.814458
ROCK2	chr2_11211909	cg12346012	-0.0109973	1.09081	0.56429	0.743392
ROCK2	chr2_11192113	cg12416416	-0.0197551	1.37912	0.588688	0.761996
ROCK2	chr2_11211593	cg12416416	0.0849399	0.390152	0.409392	0.616156
ROCK2	chr2_11211909	cg12416416	0.0759994	0.185691	0.00980057	0.052522
ROCK2	chr2_11192113	cg12680106	0.00480125	2.19894	0.851775	0.925544
ROCK2	chr2_11211593	cg12680106	0.016564	2.10805	0.816693	0.906521
ROCK2	chr2_11211909	cg12680106	-0.0105954	2.4188	0.602188	0.771304
ROCK2	chr2_11192113	cg13266327	-0.000114377	-0.414789	0.991154	0.995577
ROCK2	chr2_11211593	cg13266327	0.0359116	-0.753954	0.240996	0.447495
ROCK2	chr2_11211909	cg13266327	0.0129966	-0.594351	0.0722021	0.208188
ROCK2	chr2_11192113	cg14246661	0.0285732	0.536273	0.189435	0.385347
ROCK2	chr2_11211593	cg14246661	0.0786024	0.130802	0.215177	0.417446
ROCK2	chr2_11211909	cg14246661	-0.00148802	0.862987	0.939253	0.971156
ROCK2	chr2_11192113	cg17531288	-0.00674353	-0.229683	0.447872	0.649715
ROCK2	chr2_11211593	cg17531288	0.00724468	-0.369241	0.770812	0.881257
ROCK2	chr2_11211909	cg17531288	0.00519829	-0.372823	0.435951	0.639057
ROCK2	chr2_11192113	cg17963935	-0.0111872	-0.98306	0.419206	0.624618
ROCK2	chr2_11211593	cg17963935	0.0781192	-1.79838	0.0410714	0.141926
ROCK2	chr2_11211909	cg17963935	0.011687	-1.24692	0.279049	0.489572
ROCK2	chr2_11192113	cg18731976	0.0271521	-1.816	0.183578	0.377608
ROCK2	chr2_11211593	cg18731976	-0.207434	0.314424	0.000307555	0.0041903
ROCK2	chr2_11211909	cg18731976	-0.00864247	-1.4163	0.624171	0.787471
RTTN	chr18_70086695	cg00002236	0.00686208	-1.01341	0.101751	0.259396
RTTN	chr18_70142397	cg00002236	0.0326553	-1.20737	0.0684479	0.200646
RTTN	chr18_70086695	cg03647455	0.00701573	-1.10763	0.0698214	0.203383
RTTN	chr18_70142397	cg03647455	-0.0124986	-0.89088	0.405426	0.612774
RTTN	chr18_70086695	cg06118578	0.00767284	-0.688882	0.0987211	0.254339
RTTN	chr18_70142397	cg06118578	0.0358698	-1.02382	0.201351	0.400012
RTTN	chr18_70086695	cg06282189	-0.0114352	1.09555	0.143508	0.323837
RTTN	chr18_70142397	cg06282189	-0.00153472	1.15536	0.969383	0.9854
RTTN	chr18_70086695	cg10892794	-0.00349626	0.818353	0.756827	0.873032
RTTN	chr18_70142397	cg10892794	-0.0285091	1.51269	0.693751	0.83342
RTTN	chr18_70086695	cg12293415	0.0240678	-0.824038	0.0131221	0.06435
RTTN	chr18_70142397	cg12293415	0.0270243	-1.10951	0.403064	0.610895
RTTN	chr18_70086695	cg12375025	0.00754678	-2.25257	0.645626	0.801965
RTTN	chr18_70142397	cg12375025	0.0918338	-2.83684	0.283934	0.494842
RTTN	chr18_70086695	cg13359134	0.0155656	-1.73607	0.0255909	0.102585
RTTN	chr18_70142397	cg13359134	0.0409463	-2.1826	0.146395	0.327681
RTTN	chr18_70086695	cg15656901	0.0189343	-1.44888	8.28388e-06	0.000257985
RTTN	chr18_70142397	cg15656901	0.0101326	-1.43819	0.67689	0.82255
RTTN	chr18_70086695	cg17023972	0.0161664	-1.71842	0.0879871	0.23605
RTTN	chr18_70142397	cg17023972	0.0207407	-1.78811	0.557593	0.737674
RTTN	chr18_70086695	cg18824571	0.0141988	-1.86155	0.00476088	0.0313118
RTTN	chr18_70142397	cg18824571	0.0120613	-1.58912	0.62954	0.791547
RTTN	chr18_70086695	cg19723154	0.0311472	-0.00341226	0.119862	0.289483
RTTN	chr18_70142397	cg19723154	0.00812395	0.338064	0.91165	0.957921
RTTN	chr18_70086695	cg20423427	0.0257021	-2.90816	0.0874232	0.235181
RTTN	chr18_70142397	cg20423427	0.149808	-4.20823	0.0429521	0.146505
RTTN	chr18_70086695	cg22223655	0.0139436	-0.834433	0.210424	0.411581
RTTN	chr18_70142397	cg22223655	0.0365901	-0.899207	0.58844	0.761941
RTTN	chr18_70086695	cg24218995	-0.00168496	-1.39016	0.8293	0.913565
RTTN	chr18_70142397	cg24218995	0.0182591	-1.56698	0.705777	0.842079
RTTN	chr18_70086695	cg27359501	0.00907777	-1.51978	0.166133	0.354781
RTTN	chr18_70142397	cg27359501	0.00803349	-1.26295	0.819609	0.908108
AGA	chr4_177436361	cg00004818	0.021288	-0.744785	0.0854125	0.231699
AGA	chr4_177436361	cg00398048	0.0192342	-0.423988	0.189688	0.385681
AGA	chr4_177436361	cg00826892	0.0244624	-0.0324834	0.201992	0.400616
AGA	chr4_177436361	cg02155262	0.0177103	-0.895843	0.0796801	0.221926
AGA	chr4_177436361	cg04514020	0.0256423	-1.30196	0.0343249	0.125887
AGA	chr4_177436361	cg07155684	0.0445348	0.120541	0.0850936	0.231121
AGA	chr4_177436361	cg07536998	0.0275785	-0.898427	0.00760659	0.0437937
AGA	chr4_177436361	cg09947881	0.0390912	-1.69922	0.00774215	0.0443215
AGA	chr4_177436361	cg09976051	0.0204876	-0.151497	0.422788	0.627949
AGA	chr4_177436361	cg11143796	0.0053449	-1.12263	0.823928	0.91065
AGA	chr4_177436361	cg14414876	0.0451762	0.302092	0.0505145	0.163413
AGA	chr4_177436361	cg14564766	0.019874	0.605965	0.417023	0.622674
AGA	chr4_177436361	cg14772412	0.0255452	0.261029	0.364634	0.574502
AGA	chr4_177436361	cg16070743	0.00967689	-0.749793	0.638209	0.796972
AGA	chr4_177436361	cg27436044	-0.0172146	1.46168	0.423121	0.627959
APAF1	chr12_98723620	cg00008452	0.034613	0.794345	0.0102792	0.0542387
APAF1	chr12_98723620	cg00095463	0.0147043	-1.26404	0.0509016	0.16423
APAF1	chr12_98723620	cg00210842	0.00345408	-1.19931	0.600314	0.770177
APAF1	chr12_98723620	cg04614943	-0.00965905	-1.30272	0.403766	0.611438
APAF1	chr12_98723620	cg04891495	-0.0225668	-1.96728	0.169893	0.359377
APAF1	chr12_98723620	cg05955566	0.0178023	-0.818944	0.000147969	0.00242457
APAF1	chr12_98723620	cg06573718	0.0256253	-1.98945	0.0205193	0.088301
APAF1	chr12_98723620	cg07278047	0.00891081	0.361258	0.200047	0.398325
APAF1	chr12_98723620	cg07537021	0.00416888	-0.909084	0.521727	0.710678
APAF1	chr12_98723620	cg07865790	0.00131363	-1.00544	0.840548	0.919642
APAF1	chr12_98723620	cg07896108	-0.0227095	-0.505206	0.0444431	0.149894
APAF1	chr12_98723620	cg08118649	0.00740512	-1.01065	0.608349	0.775469
APAF1	chr12_98723620	cg08531025	0.013605	0.684133	0.279045	0.489572
APAF1	chr12_98723620	cg09254001	0.0241289	-1.08087	0.00472288	0.0311233
APAF1	chr12_98723620	cg12502759	0.0188468	-2.03547	0.0661035	0.196435
APAF1	chr12_98723620	cg12944944	-0.000308117	1.11483	0.972995	0.98722
APAF1	chr12_98723620	cg14188481	0.0100693	-1.88642	0.520958	0.710047
APAF1	chr12_98723620	cg14872956	0.00188529	-0.874857	0.763218	0.87708
APAF1	chr12_98723620	cg15373950	0.0245046	-0.838096	6.09577e-08	5.15386e-06
APAF1	chr12_98723620	cg17525003	0.00964031	-0.933606	0.132543	0.307684
APAF1	chr12_98723620	cg18466108	0.0055301	-1.25504	0.628923	0.79098
APAF1	chr12_98723620	cg18957484	0.0247979	-2.72881	0.136998	0.314194
APAF1	chr12_98723620	cg19136183	0.0217548	-1.76391	0.0138346	0.0667138
APAF1	chr12_98723620	cg19196182	-0.00217713	-0.967632	0.752087	0.870821
APAF1	chr12_98723620	cg19896351	0.00471554	0.561178	0.648202	0.803614
APAF1	chr12_98723620	cg20632863	0.0326745	-2.36536	0.0583903	0.180436
APAF1	chr12_98723620	cg21051375	0.0452024	-2.75886	0.0332658	0.123068
APAF1	chr12_98723620	cg21540775	0.0170347	-0.874988	0.0250693	0.101301
APAF1	chr12_98723620	cg23672480	-0.00891039	-1.46407	0.498913	0.693126
APAF1	chr12_98723620	cg24034106	0.00817923	-0.873126	0.139654	0.317944
HIF1A	chr14_61727395	cg00008621	-0.00579683	1.1645	0.94739	0.975261
HIF1A	chr14_61738031	cg00008621	0.012588	0.986211	0.491511	0.687186
HIF1A	chr14_61727395	cg01182555	0.0646275	-2.35824	0.63409	0.794047
HIF1A	chr14_61738031	cg01182555	0.0325741	-2.06301	0.195837	0.393541
HIF1A	chr14_61727395	cg03049881	0.0128765	0.909048	0.907976	0.955988
HIF1A	chr14_61738031	cg03049881	-0.00514619	1.09998	0.830227	0.914054
HIF1A	chr14_61727395	cg04509825	-0.011648	-1.49954	0.772906	0.882504
HIF1A	chr14_61738031	cg04509825	0.00349901	-1.67852	0.657994	0.809953
HIF1A	chr14_61727395	cg04948941	0.109284	-2.04569	0.182772	0.376764
HIF1A	chr14_61738031	cg04948941	-0.00963097	-0.865902	0.535646	0.720976
HIF1A	chr14_61727395	cg07052387	0.0350659	-0.950703	0.201095	0.399729
HIF1A	chr14_61738031	cg07052387	0.00700115	-0.739298	0.182688	0.376706
HIF1A	chr14_61727395	cg08141928	0.0633986	-1.24726	0.0591455	0.182077
HIF1A	chr14_61738031	cg08141928	0.0200794	-0.921376	0.00137041	0.0126914
HIF1A	chr14_61727395	cg13259118	-0.0604192	-1.23636	0.422015	0.627317
HIF1A	chr14_61738031	cg13259118	0.00171682	-1.80792	0.912004	0.958176
HIF1A	chr14_61727395	cg20580088	0.0126831	-0.456569	0.669102	0.817859
HIF1A	chr14_61738031	cg20580088	0.00151501	-0.372137	0.803036	0.899492
HIF1A	chr14_61727395	cg20931965	0.147134	-0.459216	0.0601917	0.184343
HIF1A	chr14_61738031	cg20931965	0.0700928	-0.0322647	1.53778e-06	6.71385e-05
HIF1A	chr14_61727395	cg25579356	0.0563164	-1.4952	0.126494	0.298998
HIF1A	chr14_61738031	cg25579356	0.0215668	-1.27421	0.00414291	0.0284378
HIF1A	chr14_61727395	cg26661257	0.100009	-1.91723	0.00489177	0.0318956
HIF1A	chr14_61738031	cg26661257	0.010229	-1.15891	0.184619	0.379
HIF1A	chr14_61727395	cg27273157	0.0449427	-2.30559	0.541623	0.72613
HIF1A	chr14_61738031	cg27273157	0.0130039	-2.10653	0.350405	0.561136
DDX18	chr2_117821116	cg00009412	0.0758918	-1.72351	0.166951	0.356049
DDX18	chr2_117821116	cg00827380	0.102568	-1.79017	0.335793	0.547722
DDX18	chr2_117821116	cg02005375	0.201851	-2.46918	0.00034962	0.00462881
DDX18	chr2_117821116	cg02061876	-0.0364481	-1.45082	0.774236	0.883326
DDX18	chr2_117821116	cg04664968	0.0192108	-0.513401	0.736911	0.861102
DDX18	chr2_117821116	cg11393119	0.0960005	-1.67685	0.0729751	0.2096
DDX18	chr2_117821116	cg13264341	0.0971773	-1.70241	0.173689	0.364674
DDX18	chr2_117821116	cg15478817	0.0845686	-2.02296	0.138787	0.316967
DDX18	chr2_117821116	cg17364743	0.118417	-1.8589	0.0470905	0.15604
DDX18	chr2_117821116	cg20486052	-0.0267496	-1.01615	0.771738	0.881523
DDX18	chr2_117821116	cg25593040	0.17333	-2.50646	0.000373098	0.00484226
DDX18	chr2_117821116	cg27013848	0.104974	-1.31466	0.0251531	0.101478
NLRC3	chr16_3544163	cg00011564	-0.0146619	1.70064	0.459205	0.658998
NLRC3	chr16_3544163	cg02016178	0.0332622	-0.298933	0.00213034	0.0174518
NLRC3	chr16_3544163	cg02127172	0.0261098	-0.171348	0.030465	0.115824
NLRC3	chr16_3544163	cg02343379	0.00383543	0.406218	0.821881	0.909361
NLRC3	chr16_3544163	cg02719221	-0.0102913	0.545952	0.361642	0.571816
NLRC3	chr16_3544163	cg02819734	-0.0145882	0.139302	0.293517	0.504523
NLRC3	chr16_3544163	cg03065612	0.0491272	-0.631547	3.76505e-05	0.000854985
NLRC3	chr16_3544163	cg03320754	0.0289086	-0.223427	0.00209635	0.0172404
NLRC3	chr16_3544163	cg04082551	0.0187329	0.0959118	0.234999	0.440435
NLRC3	chr16_3544163	cg04286003	-0.0693363	1.50516	0.00924382	0.0503072
NLRC3	chr16_3544163	cg04606170	0.0170418	-0.0388854	0.117921	0.286272
NLRC3	chr16_3544163	cg05428433	0.0090975	0.315952	0.693608	0.833411
NLRC3	chr16_3544163	cg05886954	0.0409607	1.05189	0.0244551	0.0996349
NLRC3	chr16_3544163	cg07611575	-0.0403905	0.884615	0.00309198	0.0228787
NLRC3	chr16_3544163	cg07762961	0.000383999	-0.184454	0.967929	0.98459
NLRC3	chr16_3544163	cg07978591	-0.0265031	1.5089	0.21218	0.413656
NLRC3	chr16_3544163	cg08213607	0.0415767	-0.702388	0.000881708	0.00918432
NLRC3	chr16_3544163	cg10186768	-0.0210659	2.73803	0.525328	0.713578
NLRC3	chr16_3544163	cg16429499	0.00978803	0.592441	0.651864	0.805957
NLRC3	chr16_3544163	cg16538366	-0.0758721	1.98336	0.00172484	0.0150099
NLRC3	chr16_3544163	cg16558659	0.0179533	0.942552	0.562303	0.741692
NLRC3	chr16_3544163	cg16559302	-0.0135119	0.698214	0.456206	0.656649
NLRC3	chr16_3544163	cg22171142	0.00219683	0.0833742	0.873217	0.93665
NLRC3	chr16_3544163	cg27146574	-0.0087339	0.481862	0.59624	0.767078
NLRC3	chr16_3544163	cg27179111	0.0207878	-0.112857	0.0178658	0.0801221
NLRC3	chr16_3544163	cg27366775	-0.00741712	1.50674	0.752127	0.870838
ARPC2	chr2_218238591	cg00012203	-0.0386163	-1.57288	0.00180036	0.0154651
ARPC2	chr2_218238591	cg00752852	0.00134911	-1.76524	0.872158	0.936087
ARPC2	chr2_218238591	cg04381898	-0.00767848	-1.42641	0.234807	0.440182
ARPC2	chr2_218238591	cg04731861	0.0549953	-0.529538	3.71644e-07	2.17085e-05
ARPC2	chr2_218238591	cg04917148	-0.00386601	-2.82939	0.707479	0.843128
ARPC2	chr2_218238591	cg05351940	-0.00184171	-1.38025	0.645889	0.802036
ARPC2	chr2_218238591	cg06608945	0.0115272	-0.701457	3.70181e-07	2.17031e-05
ARPC2	chr2_218238591	cg08216808	0.000704389	-0.102172	0.902059	0.952799
ARPC2	chr2_218238591	cg09247346	-0.00238142	-1.66048	0.693232	0.833175
ARPC2	chr2_218238591	cg09906780	-0.0296532	1.59596	0.0126623	0.0628436
ARPC2	chr2_218238591	cg11691181	-0.0248568	-0.863291	0.00406059	0.0280286
ARPC2	chr2_218238591	cg11838463	0.00157853	-1.28921	0.702504	0.839436
ARPC2	chr2_218238591	cg12684684	0.0245522	-2.70651	0.246708	0.454371
ARPC2	chr2_218238591	cg12884009	0.0426898	0.0485219	3.38236e-05	0.000789581
ARPC2	chr2_218238591	cg13027571	0.00978875	-2.08551	0.331441	0.543295
ARPC2	chr2_218238591	cg13240332	0.00340123	-1.16948	0.296272	0.507183
ARPC2	chr2_218238591	cg16672685	-0.0068907	-1.46225	0.194313	0.391588
ARPC2	chr2_218238591	cg17651887	-0.00576133	0.426069	0.234547	0.439909
ARPC2	chr2_218238591	cg19141132	-0.0296954	1.66429	0.0944252	0.246996
ARPC2	chr2_218238591	cg27288971	0.00741833	-0.371468	0.0165114	0.075803
STK38	chr6_36515205	cg00016223	0.0245162	-2.85748	0.661111	0.81228
STK38	chr6_36515205	cg00106211	-0.00526232	-0.8249	0.729649	0.856964
STK38	chr6_36515205	cg02964385	-0.00466269	-0.135064	0.823965	0.91065
STK38	chr6_36515205	cg03063347	-0.0202462	-0.770233	0.23097	0.436221
STK38	chr6_36515205	cg09817248	-0.0118672	-0.563892	0.619355	0.783739
STK38	chr6_36515205	cg13644807	0.00872006	-0.642722	0.681173	0.825286
STK38	chr6_36515205	cg23670203	-0.0497288	0.680764	0.317465	0.529847
STK38	chr6_36515205	cg24363146	-0.00221112	-1.42751	0.90346	0.953523
STK38	chr6_36515205	cg26171271	0.0742184	-0.013613	0.0815977	0.225034
ARHGAP15	chr2_143155713	cg00016324	-0.064518	0.645194	0.00937193	0.0508217
ARHGAP15	chr2_143155713	cg04351205	-0.025946	0.355414	0.354575	0.564744
ARHGAP15	chr2_143155713	cg05307752	-0.00405467	-0.0419089	0.897117	0.95023
ARHGAP15	chr2_143155713	cg07211155	-0.120471	1.39131	0.0240272	0.0984735
ARHGAP15	chr2_143155713	cg07409629	-0.0963093	1.06809	0.01184	0.0600209
ARHGAP15	chr2_143155713	cg07539108	-0.0199877	0.307972	0.342065	0.553606
ARHGAP15	chr2_143155713	cg07621645	-0.07805	0.520889	0.00517374	0.0332013
ARHGAP15	chr2_143155713	cg08820401	-0.100428	1.14815	0.00836718	0.0468312
ARHGAP15	chr2_143155713	cg11310863	-0.037538	1.39621	0.104292	0.263795
ARHGAP15	chr2_143155713	cg12058385	-0.051028	0.551843	0.0371328	0.13275
ARHGAP15	chr2_143155713	cg14851140	-0.0328452	0.637307	0.466251	0.664821
ARHGAP15	chr2_143155713	cg17056048	-0.0429414	0.388371	0.0157705	0.0734442
ARHGAP15	chr2_143155713	cg17592268	-0.0539534	0.591466	0.0414006	0.14262
ARHGAP15	chr2_143155713	cg17600630	-0.0396196	0.31196	0.013145	0.0644425
ARHGAP15	chr2_143155713	cg18855030	-0.0515905	0.52322	0.0771745	0.217297
ARHGAP15	chr2_143155713	cg19867914	-0.0395555	0.476262	0.277881	0.488321
ARHGAP15	chr2_143155713	cg21291880	0.00677946	1.08895	0.844813	0.922126
ARHGAP15	chr2_143155713	cg21338523	-0.0768584	1.51306	0.0871865	0.234771
ARHGAP15	chr2_143155713	cg21339799	-0.0362197	1.54273	0.271882	0.482034
ARHGAP15	chr2_143155713	cg22922100	-0.0269912	0.600483	0.595028	0.76611
ARHGAP15	chr2_143155713	cg23498755	-0.0330578	0.296227	0.0551991	0.17391
ARHGAP15	chr2_143155713	cg23627134	-0.0300033	0.185329	0.029374	0.112915
ARHGAP15	chr2_143155713	cg25026949	-0.0834953	1.01266	0.176811	0.368874
ARHGAP15	chr2_143155713	cg27365426	-0.0181308	0.230212	0.302068	0.51334
ARHGAP15	chr2_143155713	cg27455061	-0.124071	1.75488	0.00623059	0.0379995
ARHGAP15	chr2_143155713	cg27492839	-0.0569652	0.708945	0.0901855	0.239976
MMUT	chr6_49447639	cg00016718	0.00292942	1.13111	0.767727	0.879666
MMUT	chr6_49447639	cg01804627	0.00580469	-1.047	0.240229	0.44661
MMUT	chr6_49447639	cg02627747	0.0126838	-1.03123	0.0185828	0.0824606
MMUT	chr6_49447639	cg03914985	0.0134307	-1.82046	0.138926	0.317133
MMUT	chr6_49447639	cg07174975	0.00694183	1.4711	0.467468	0.666081
MMUT	chr6_49447639	cg07931783	0.00120314	-1.59679	0.864316	0.932356
MMUT	chr6_49447639	cg08367673	-0.00338146	-0.731448	0.589497	0.762262
MMUT	chr6_49447639	cg10568944	0.0138513	-1.06208	0.0191578	0.0843157
MMUT	chr6_49447639	cg12171781	0.0270598	1.18617	0.00884186	0.0486678
MMUT	chr6_49447639	cg12421819	0.00681047	-0.920078	0.289721	0.500786
MMUT	chr6_49447639	cg14381986	0.00824742	-0.800454	0.0183078	0.0815987
MMUT	chr6_49447639	cg15002204	0.00403193	-0.503267	0.588418	0.761941
MMUT	chr6_49447639	cg18823633	0.0103302	-0.766676	0.0233918	0.0966663
MMUT	chr6_49447639	cg23106890	0.00529686	-1.16569	0.33298	0.545014
MMUT	chr6_49447639	cg23314742	0.00847467	-1.62547	0.186208	0.381438
MMUT	chr6_49447639	cg24337497	0.00585276	-1.54249	0.391037	0.599734
MMUT	chr6_49447639	cg25786862	0.0123236	-0.793556	0.00157435	0.0140542
PCNX4	chr14_60114682	cg00017033	0.00548198	-1.48722	0.911567	0.957894
PCNX4	chr14_60121157	cg00017033	0.0032222	-1.54182	0.759371	0.874665
PCNX4	chr14_60150197	cg00017033	0.0148225	-1.67813	0.047844	0.157847
PCNX4	chr14_60114682	cg00708844	0.0264793	-1.13921	0.440489	0.643464
PCNX4	chr14_60121157	cg00708844	-0.0034143	-0.732366	0.60204	0.77129
PCNX4	chr14_60150197	cg00708844	0.000124092	-0.824338	0.980434	0.990725
PCNX4	chr14_60114682	cg00846580	0.0826675	-1.61719	0.0143928	0.068729
PCNX4	chr14_60121157	cg00846580	0.0148118	-0.998597	0.0149527	0.0707433
PCNX4	chr14_60150197	cg00846580	0.017902	-0.885069	2.65812e-05	0.000653484
PCNX4	chr14_60114682	cg01023344	0.023081	-1.10124	0.455181	0.655753
PCNX4	chr14_60121157	cg01023344	0.018228	-1.2672	0.00129857	0.0121784
PCNX4	chr14_60150197	cg01023344	-0.000524589	-0.831566	0.902845	0.953297
PCNX4	chr14_60114682	cg01074676	-0.00442919	1.07867	0.934711	0.968977
PCNX4	chr14_60121157	cg01074676	-0.00454957	1.14043	0.645712	0.801971
PCNX4	chr14_60150197	cg01074676	-0.0023624	1.06498	0.756381	0.872729
PCNX4	chr14_60114682	cg02850003	0.0429716	-3.05094	0.630819	0.792323
PCNX4	chr14_60121157	cg02850003	-0.0011893	-2.70148	0.937276	0.970609
PCNX4	chr14_60150197	cg02850003	0.00480227	-2.66603	0.6836	0.826894
PCNX4	chr14_60114682	cg03037218	0.0853377	-2.2129	0.0100315	0.0534176
PCNX4	chr14_60121157	cg03037218	0.0173123	-1.60755	0.00297875	0.0222667
PCNX4	chr14_60150197	cg03037218	0.0184968	-1.43685	0.000147805	0.00242307
PCNX4	chr14_60114682	cg06746112	-0.0236921	-0.332121	0.580163	0.75597
PCNX4	chr14_60121157	cg06746112	-0.0110106	-0.37327	0.151835	0.335362
PCNX4	chr14_60150197	cg06746112	-0.00353517	-0.564715	0.564234	0.743356
PCNX4	chr14_60114682	cg06898279	0.181031	-1.4758	0.000661386	0.00745705
PCNX4	chr14_60121157	cg06898279	0.0101774	0.436079	0.286424	0.497409
PCNX4	chr14_60150197	cg06898279	0.0300325	0.204628	3.99864e-05	0.000891584
PCNX4	chr14_60114682	cg07075568	0.0289136	1.28399	0.609798	0.776484
PCNX4	chr14_60121157	cg07075568	0.000217914	1.66849	0.983567	0.992001
PCNX4	chr14_60150197	cg07075568	0.00456653	1.53179	0.546601	0.730109
PCNX4	chr14_60114682	cg08634539	-0.00620252	-0.700174	0.828	0.91302
PCNX4	chr14_60121157	cg08634539	0.00873495	-0.994494	0.108161	0.270405
PCNX4	chr14_60150197	cg08634539	0.00316369	-0.848232	0.419831	0.625127
PCNX4	chr14_60114682	cg09314642	0.0151635	-1.68803	0.739986	0.862808
PCNX4	chr14_60121157	cg09314642	0.00263302	-1.59286	0.753594	0.871385
PCNX4	chr14_60150197	cg09314642	-0.00151031	-1.49108	0.792128	0.893397
PCNX4	chr14_60114682	cg09694403	-0.00241038	-1.64393	0.957785	0.979683
PCNX4	chr14_60121157	cg09694403	0.0151232	-2.04363	0.0699248	0.203595
PCNX4	chr14_60150197	cg09694403	0.012716	-1.89053	0.0388759	0.136714
PCNX4	chr14_60114682	cg12407844	0.0410192	-1.18882	0.310515	0.522616
PCNX4	chr14_60121157	cg12407844	0.0141613	-1.04612	0.0453946	0.151984
PCNX4	chr14_60150197	cg12407844	0.0150592	-0.939982	0.00784025	0.0447293
PCNX4	chr14_60114682	cg13277940	0.0327083	-1.24673	0.468179	0.666751
PCNX4	chr14_60121157	cg13277940	0.00641502	-1.04173	0.440557	0.643536
PCNX4	chr14_60150197	cg13277940	0.0104571	-1.08183	0.0789574	0.220583
PCNX4	chr14_60114682	cg13624631	0.275222	-3.9028	0.000204779	0.00307738
PCNX4	chr14_60121157	cg13624631	0.046677	-1.64113	0.000335154	0.0044874
PCNX4	chr14_60150197	cg13624631	0.0137173	-0.728721	0.176108	0.367921
PCNX4	chr14_60114682	cg14094449	0.0410563	-1.42025	0.462224	0.661608
PCNX4	chr14_60121157	cg14094449	0.0249273	-1.61411	0.0191684	0.08434
PCNX4	chr14_60150197	cg14094449	0.0198445	-1.25841	0.0162708	0.0750457
PCNX4	chr14_60114682	cg14987564	0.0636703	-1.28946	0.0243837	0.0995211
PCNX4	chr14_60121157	cg14987564	0.0150752	-0.912685	0.00269796	0.0207189
PCNX4	chr14_60150197	cg14987564	0.00691281	-0.638758	0.0764096	0.215946
PCNX4	chr14_60114682	cg15852532	0.065912	-1.63967	0.114587	0.281136
PCNX4	chr14_60121157	cg15852532	0.0162054	-1.21868	0.02735	0.107321
PCNX4	chr14_60150197	cg15852532	0.0162131	-1.11865	0.00619629	0.037825
PCNX4	chr14_60114682	cg15876689	0.0668718	-1.64664	0.168766	0.358085
PCNX4	chr14_60121157	cg15876689	0.014187	-1.14452	0.109686	0.272973
PCNX4	chr14_60150197	cg15876689	0.00676953	-1.01103	0.309865	0.521931
PCNX4	chr14_60114682	cg18208853	0.00590202	-0.955832	0.844136	0.921842
PCNX4	chr14_60121157	cg18208853	0.0122847	-1.19902	0.0218458	0.0922093
PCNX4	chr14_60150197	cg18208853	0.00375469	-0.959879	0.337751	0.5496
PCNX4	chr14_60114682	cg18906360	-0.0508922	0.759539	0.291654	0.502581
PCNX4	chr14_60121157	cg18906360	0.00487921	0.0461503	0.569107	0.747588
PCNX4	chr14_60150197	cg18906360	0.00743308	0.0633273	0.256841	0.466235
PCNX4	chr14_60114682	cg23283614	0.0331053	-0.63723	0.452293	0.653401
PCNX4	chr14_60121157	cg23283614	0.01999	-0.732451	0.0303633	0.115569
PCNX4	chr14_60150197	cg23283614	0.0220472	-0.619304	0.00112439	0.0109841
PCNX4	chr14_60114682	cg23564559	-0.0328979	-1.50667	0.563056	0.742277
PCNX4	chr14_60121157	cg23564559	-0.00130142	-1.91711	0.901372	0.952527
PCNX4	chr14_60150197	cg23564559	0.00690897	-1.99236	0.358063	0.568105
PCNX4	chr14_60114682	cg23574243	0.104325	-0.463982	0.086972	0.234402
PCNX4	chr14_60121157	cg23574243	0.0324088	0.0485455	0.00340854	0.0246409
PCNX4	chr14_60150197	cg23574243	0.0203548	0.527873	0.0129179	0.0636853
PCNX4	chr14_60114682	cg24093178	0.0375351	-1.37935	0.311929	0.524015
PCNX4	chr14_60121157	cg24093178	0.0137174	-1.26712	0.0294304	0.113063
PCNX4	chr14_60150197	cg24093178	0.00715437	-1.03961	0.167677	0.357002
PCNX4	chr14_60114682	cg24461412	-0.0014094	-0.701027	0.973133	0.987272
PCNX4	chr14_60121157	cg24461412	0.0233994	-1.28754	0.00221098	0.0178985
PCNX4	chr14_60150197	cg24461412	0.00995103	-0.913933	0.0777268	0.21828
PCNX4	chr14_60114682	cg25563087	0.0794282	-2.4408	0.0544254	0.172095
PCNX4	chr14_60121157	cg25563087	0.00517313	-1.61723	0.518093	0.70802
PCNX4	chr14_60150197	cg25563087	-0.00620629	-1.40753	0.308853	0.520832
PCNX4	chr14_60114682	cg26172862	0.0169803	-1.69516	0.838678	0.918441
PCNX4	chr14_60121157	cg26172862	-0.00563981	-1.45254	0.724468	0.85395
PCNX4	chr14_60150197	cg26172862	-0.00394359	-1.53589	0.73022	0.857318
SRBD1	chr2_45579825	cg00017059	0.00150809	1.10593	0.959184	0.980115
SRBD1	chr2_45579825	cg01013336	0.0327723	0.842897	0.189472	0.385399
SRBD1	chr2_45579825	cg02630207	-0.159156	3.657	2.27411e-07	1.48539e-05
SRBD1	chr2_45579825	cg05415767	-0.0111851	1.46917	0.830059	0.91399
SRBD1	chr2_45579825	cg08948149	0.000197599	1.16215	0.993699	0.996601
SRBD1	chr2_45579825	cg09273012	0.0250365	0.496994	0.388637	0.597263
SRBD1	chr2_45579825	cg11025750	-0.00856453	1.79482	0.80266	0.899217
SRBD1	chr2_45579825	cg12087108	-0.0585047	-0.511578	0.07436	0.2121
SRBD1	chr2_45579825	cg12939390	-0.101188	2.36132	0.0703114	0.204471
SRBD1	chr2_45579825	cg14832358	0.0042583	-1.0198	0.794214	0.89446
SRBD1	chr2_45579825	cg15053029	0.0398374	0.162701	0.113999	0.280173
SRBD1	chr2_45579825	cg15146906	-0.00199628	-0.979578	0.911653	0.957921
SRBD1	chr2_45579825	cg15156059	0.0250742	-0.531059	0.219113	0.422262
SRBD1	chr2_45579825	cg15679981	0.0468877	0.102314	0.150678	0.333602
SRBD1	chr2_45579825	cg16402715	0.0170892	0.726266	0.469802	0.668149
SRBD1	chr2_45579825	cg18016822	0.0147596	-1.27039	0.51602	0.706522
SRBD1	chr2_45579825	cg18940723	0.0188027	-1.31552	0.141822	0.321252
SRBD1	chr2_45579825	cg20335008	0.0440903	-1.62952	0.00267039	0.0205965
SRBD1	chr2_45579825	cg20732286	0.0350602	0.154423	0.152589	0.336392
SRBD1	chr2_45579825	cg23995169	-0.044527	1.24559	0.0060921	0.0373189
SRBD1	chr2_45579825	cg24076774	0.0158536	-1.61243	0.639467	0.79768
SRBD1	chr2_45579825	cg25377726	-0.00393317	-0.971454	0.734678	0.859938
SRBD1	chr2_45579825	cg25590579	-0.0149266	-0.993465	0.330771	0.542603
ZDHHC14	chr6_157628320	cg00017931	0.0922667	-0.808659	7.12999e-08	5.92305e-06
ZDHHC14	chr6_157628320	cg00283857	-0.138459	2.52989	2.85196e-06	0.000112034
ZDHHC14	chr6_157628320	cg00502442	-0.0135031	-1.83456	0.534766	0.720141
ZDHHC14	chr6_157628320	cg00725778	0.0401674	0.567897	0.0577934	0.179088
ZDHHC14	chr6_157628320	cg00756338	0.116435	0.753325	0.0105366	0.0552138
ZDHHC14	chr6_157628320	cg01112643	0.0254779	-0.762065	0.000168234	0.00265775
ZDHHC14	chr6_157628320	cg01174743	0.0675178	-0.289294	0.00133324	0.0124336
ZDHHC14	chr6_157628320	cg01185640	-0.0257757	1.75826	0.204213	0.403533
ZDHHC14	chr6_157628320	cg01713311	0.0777138	-0.733085	2.47183e-10	6.53093e-08
ZDHHC14	chr6_157628320	cg01962471	0.0225762	0.329761	0.0400097	0.139414
ZDHHC14	chr6_157628320	cg02079880	-0.00203403	-1.40355	0.917955	0.961329
ZDHHC14	chr6_157628320	cg02197279	-0.00346363	1.60722	0.889581	0.945888
ZDHHC14	chr6_157628320	cg02332782	0.0257201	-0.925255	0.00838299	0.0468783
ZDHHC14	chr6_157628320	cg03054050	0.00576767	1.08298	0.72413	0.853732
ZDHHC14	chr6_157628320	cg03061585	0.0144943	0.503261	0.426653	0.631478
ZDHHC14	chr6_157628320	cg03125341	0.0477747	-0.717808	0.000134057	0.00225655
ZDHHC14	chr6_157628320	cg03344384	0.0836009	-0.267468	0.000686683	0.00768383
ZDHHC14	chr6_157628320	cg03411334	0.0344656	0.470633	0.0306914	0.116512
ZDHHC14	chr6_157628320	cg03435677	0.125929	0.247963	0.128564	0.301961
ZDHHC14	chr6_157628320	cg03856024	0.0529048	0.590605	0.0390711	0.137134
ZDHHC14	chr6_157628320	cg04302618	0.132573	-1.3923	0.000722662	0.00797922
ZDHHC14	chr6_157628320	cg04654167	0.0100017	-0.50149	0.476186	0.674262
ZDHHC14	chr6_157628320	cg04762312	0.0392488	-0.173608	0.0294576	0.113143
ZDHHC14	chr6_157628320	cg04906636	0.0435783	0.513869	0.0983246	0.253644
ZDHHC14	chr6_157628320	cg05750031	0.0883563	0.3482	0.000176421	0.0027488
ZDHHC14	chr6_157628320	cg05956452	-0.11535	2.15991	0.000255986	0.00365669
ZDHHC14	chr6_157628320	cg06647446	0.00527884	0.989779	0.776192	0.884573
ZDHHC14	chr6_157628320	cg06863300	0.0927871	0.207429	0.000245212	0.00354074
ZDHHC14	chr6_157628320	cg07487751	-0.0110132	1.1385	0.624713	0.787856
ZDHHC14	chr6_157628320	cg07875215	0.107383	0.0937632	0.0034939	0.0250838
ZDHHC14	chr6_157628320	cg08377279	0.0240029	-1.21581	0.0287873	0.111274
ZDHHC14	chr6_157628320	cg08929197	0.0825584	-0.203744	4.35067e-05	0.000949112
ZDHHC14	chr6_157628320	cg09076927	0.0578946	-0.122748	1.81146e-05	0.000481673
ZDHHC14	chr6_157628320	cg09484852	0.059298	-0.03669	0.264212	0.474038
ZDHHC14	chr6_157628320	cg09783253	0.109153	-0.524482	0.00439264	0.0296047
ZDHHC14	chr6_157628320	cg09981914	0.0924043	-0.240542	0.00322534	0.0236397
ZDHHC14	chr6_157628320	cg10307602	-0.00139383	0.578863	0.951589	0.977349
ZDHHC14	chr6_157628320	cg10372349	0.134248	-0.457545	0.0337939	0.124543
ZDHHC14	chr6_157628320	cg10378795	0.0333991	-0.0435547	0.065151	0.194594
ZDHHC14	chr6_157628320	cg10525394	0.0285955	0.001755	0.0439833	0.148848
ZDHHC14	chr6_157628320	cg10592926	-0.024243	1.79068	0.338925	0.550536
ZDHHC14	chr6_157628320	cg10880973	-0.11835	2.02474	0.00577169	0.0358639
ZDHHC14	chr6_157628320	cg12297590	0.0834668	-0.573172	0.0188796	0.0835105
ZDHHC14	chr6_157628320	cg13026550	0.0106453	2.27894	0.46074	0.660307
ZDHHC14	chr6_157628320	cg14140554	-0.0973233	1.73159	0.000531769	0.00635833
ZDHHC14	chr6_157628320	cg14235350	0.0246769	-0.75587	0.00918674	0.0501111
ZDHHC14	chr6_157628320	cg14347275	-0.0107646	1.66833	0.620386	0.784537
ZDHHC14	chr6_157628320	cg14514483	0.139938	0.425016	6.64189e-07	3.52878e-05
ZDHHC14	chr6_157628320	cg14781890	0.0913531	0.652014	0.253614	0.462637
ZDHHC14	chr6_157628320	cg15019848	0.065892	0.19616	0.000334524	0.00448077
ZDHHC14	chr6_157628320	cg15401922	0.0124772	-0.631624	0.462826	0.662009
ZDHHC14	chr6_157628320	cg15599146	0.0257752	-1.64882	0.387686	0.596324
ZDHHC14	chr6_157628320	cg15921773	0.0316087	1.8515	0.046722	0.155177
ZDHHC14	chr6_157628320	cg16679543	0.265528	-1.39859	5.398e-06	0.000186189
ZDHHC14	chr6_157628320	cg17310882	0.0811954	-0.268176	0.000130703	0.00221981
ZDHHC14	chr6_157628320	cg17622855	-0.117162	1.85559	0.000947319	0.00964966
ZDHHC14	chr6_157628320	cg17852032	0.0590549	-0.318559	2.25871e-06	9.24351e-05
ZDHHC14	chr6_157628320	cg17941247	0.0307623	0.978521	0.121523	0.292033
ZDHHC14	chr6_157628320	cg18516854	0.0227657	1.26039	0.41095	0.617677
ZDHHC14	chr6_157628320	cg19122579	-0.00826046	-0.147021	0.487665	0.683676
ZDHHC14	chr6_157628320	cg19173493	0.00375786	0.655954	0.783589	0.888368
ZDHHC14	chr6_157628320	cg19561561	0.0344184	1.2476	0.17492	0.366335
ZDHHC14	chr6_157628320	cg20564351	-0.118803	2.31137	0.0270144	0.106435
ZDHHC14	chr6_157628320	cg20988098	0.10176	-0.414738	0.000556635	0.00657773
ZDHHC14	chr6_157628320	cg23206115	0.136858	-0.660289	4.99204e-07	2.78085e-05
ZDHHC14	chr6_157628320	cg23389785	0.0526001	0.167463	0.000146303	0.00241341
ZDHHC14	chr6_157628320	cg23502378	0.00782051	0.721124	0.527531	0.715084
ZDHHC14	chr6_157628320	cg23707590	-0.0573039	1.89058	0.0390113	0.136982
ZDHHC14	chr6_157628320	cg23971995	0.0101813	1.28674	0.600953	0.770641
ZDHHC14	chr6_157628320	cg24443054	0.0246121	-1.13419	0.0219238	0.0924699
ZDHHC14	chr6_157628320	cg24529970	0.0834	0.203159	0.00344734	0.0248459
ZDHHC14	chr6_157628320	cg25376310	0.0193633	-0.581792	0.0159885	0.0742418
ZDHHC14	chr6_157628320	cg25412641	-0.0105797	1.30529	0.573349	0.750939
ZDHHC14	chr6_157628320	cg25474648	0.0792416	0.118122	0.00628755	0.0382839
ZDHHC14	chr6_157628320	cg25578048	0.00624035	0.695788	0.746532	0.867042
ZDHHC14	chr6_157628320	cg25661132	0.0178087	-1.709	0.348555	0.559488
ZDHHC14	chr6_157628320	cg26223987	0.0158001	-1.10064	0.181067	0.37479
ZDHHC14	chr6_157628320	cg26393393	0.0359033	0.795904	0.0792354	0.221063
ZDHHC14	chr6_157628320	cg26559250	-0.017964	2.40979	0.353754	0.56417
ZDHHC14	chr6_157628320	cg27087505	0.0246161	1.00948	0.149019	0.331546
ESCO1	chr18_21539853	cg00018044	0.0920374	-0.884625	7.42533e-08	6.10747e-06
ESCO1	chr18_21539853	cg00439735	-0.00592286	1.59942	0.726078	0.85494
ESCO1	chr18_21539853	cg00572356	0.0506534	-1.30288	1.60891e-05	0.000439065
ESCO1	chr18_21539853	cg03357540	0.0225042	-2.36196	0.362633	0.572725
ESCO1	chr18_21539853	cg11772151	0.0237598	-3.2344	0.431251	0.635438
ESCO1	chr18_21539853	cg13517398	-0.00261716	-1.56274	0.869708	0.935339
ESCO1	chr18_21539853	cg16139199	0.0163919	-0.917111	0.405736	0.613061
ESCO1	chr18_21539853	cg19930057	0.0871053	-3.13092	1.35774e-05	0.00038265
ESCO1	chr18_21539853	cg19959005	0.0809442	-3.07432	2.36975e-05	0.000597412
ESCO1	chr18_21539853	cg20640305	0.0425861	-2.79118	0.0660948	0.196428
ESCO1	chr18_21539853	cg21321768	0.000874638	0.746808	0.962244	0.981785
ESCO1	chr18_21539853	cg21790764	0.0142858	-0.899625	0.116944	0.28489
ESCO1	chr18_21539853	cg22310062	0.0192127	-0.962482	0.0809758	0.224284
ESCO1	chr18_21539853	cg23453420	0.0370242	-2.52718	0.0773414	0.217504
ESCO1	chr18_21539853	cg23872389	0.0240107	1.29783	0.338325	0.549964
TTC13	chr1_230958305	cg00018229	0.0437168	-0.949182	4.67114e-09	6.42996e-07
TTC13	chr1_230958305	cg01805856	-0.167159	3.3721	1.59913e-12	1.43974e-09
TTC13	chr1_230958305	cg02099313	0.0192573	-0.849511	0.0006461	0.0073439
TTC13	chr1_230958305	cg02844629	0.0117307	-1.01452	0.0446079	0.150281
TTC13	chr1_230958305	cg03017653	0.0461046	-0.993025	6.34356e-12	3.61007e-09
TTC13	chr1_230958305	cg05776488	0.0132018	-1.3576	0.0124204	0.0620035
TTC13	chr1_230958305	cg06078874	0.0143591	-1.81474	0.037297	0.133152
TTC13	chr1_230958305	cg06707168	0.0113734	-0.921441	0.0813757	0.224682
TTC13	chr1_230958305	cg07011025	-0.00322474	-1.26197	0.752868	0.870998
TTC13	chr1_230958305	cg08270913	0.0130591	-0.739464	0.000759936	0.00825938
TTC13	chr1_230958305	cg10324224	0.0321497	0.0290486	0.000242486	0.00350693
TTC13	chr1_230958305	cg12741407	-0.00506378	1.28149	0.674371	0.821167
TTC13	chr1_230958305	cg16563656	0.022573	-1.2974	6.18116e-05	0.00124868
TTC13	chr1_230958305	cg20136738	3.97611e-05	-0.779489	0.995281	0.997391
TTC13	chr1_230958305	cg20395940	0.0233649	-0.835371	2.21619e-07	1.46189e-05
TTC13	chr1_230958305	cg22484397	-0.0149862	1.07854	0.175088	0.366537
TTC13	chr1_230958305	cg27306913	0.0117579	-0.850096	0.0291696	0.112404
ARV1	chr1_230995821	cg00018229	0.118349	-1.39936	0.000199589	0.00302302
ARV1	chr1_230995821	cg01805856	-0.434819	4.94943	3.14701e-05	0.000749881
ARV1	chr1_230995821	cg02099313	0.0590969	-1.0986	0.0145656	0.0694097
ARV1	chr1_230995821	cg02844629	0.0248207	-1.09291	0.319289	0.531463
ARV1	chr1_230995821	cg03017653	0.194025	-2.09162	7.93998e-12	4.19836e-09
ARV1	chr1_230995821	cg05776488	0.0683441	-1.73739	0.00270957	0.020788
ARV1	chr1_230995821	cg06078874	0.104603	-2.54503	0.000378901	0.00489412
ARV1	chr1_230995821	cg06707168	0.0651342	-1.30441	0.0201179	0.0870234
ARV1	chr1_230995821	cg07011025	-0.0496716	-0.907678	0.248014	0.456253
ARV1	chr1_230995821	cg08270913	0.0680779	-1.15769	8.12474e-05	0.0015519
ARV1	chr1_230995821	cg10324224	0.149381	-0.841687	7.59711e-05	0.0014671
ARV1	chr1_230995821	cg12741407	0.0130296	1.12582	0.798258	0.896909
ARV1	chr1_230995821	cg16024801	0.245937	-1.74203	0.00271369	0.0208004
ARV1	chr1_230995821	cg16563656	0.0443402	-1.39289	0.0729371	0.209546
ARV1	chr1_230995821	cg20136738	0.00472987	-0.793023	0.868032	0.934628
ARV1	chr1_230995821	cg20395940	0.0685805	-1.13435	0.000489004	0.00595992
ARV1	chr1_230995821	cg27306913	0.0417824	-1.05489	0.0727165	0.209164
CSMD1	chr8_3188775	cg00018696	-0.019394	1.45263	0.173533	0.364439
CSMD1	chr8_3188775	cg00246768	-0.0363031	1.19499	0.116557	0.284256
CSMD1	chr8_3188775	cg00332689	-0.0211562	0.886187	0.214196	0.416174
CSMD1	chr8_3188775	cg00552087	0.00686461	1.88822	0.810512	0.903244
CSMD1	chr8_3188775	cg00631327	0.0206292	-0.000144604	0.168759	0.358085
CSMD1	chr8_3188775	cg01070560	0.0015649	1.18804	0.939861	0.971263
CSMD1	chr8_3188775	cg01136458	0.00797755	-0.168443	0.24044	0.446837
CSMD1	chr8_3188775	cg01434302	0.0136738	0.164522	0.55147	0.733322
CSMD1	chr8_3188775	cg02006324	-0.0271895	1.35231	0.350554	0.561263
CSMD1	chr8_3188775	cg02487491	-0.000674619	1.21807	0.966635	0.983853
CSMD1	chr8_3188775	cg02528400	-0.00257524	1.3414	0.877522	0.939393
CSMD1	chr8_3188775	cg02563011	-0.00294669	0.516717	0.825685	0.911801
CSMD1	chr8_3188775	cg02630677	-0.0163874	0.118016	0.166226	0.354933
CSMD1	chr8_3188775	cg02680398	-0.00184311	-0.15436	0.726481	0.855066
CSMD1	chr8_3188775	cg04663870	-0.001334	-0.301499	0.921518	0.962946
CSMD1	chr8_3188775	cg05306225	-0.003865	-0.429216	0.76581	0.878608
CSMD1	chr8_3188775	cg05999364	0.00512699	-0.32476	0.445802	0.647817
CSMD1	chr8_3188775	cg06710438	0.00687565	0.497076	0.494019	0.68923
CSMD1	chr8_3188775	cg07155495	0.00461242	0.964839	0.654566	0.807671
CSMD1	chr8_3188775	cg07777433	-0.0108777	0.604896	0.155594	0.340503
CSMD1	chr8_3188775	cg08132734	0.00195784	0.515123	0.885777	0.943525
CSMD1	chr8_3188775	cg08236285	-0.012989	0.197347	0.156637	0.341871
CSMD1	chr8_3188775	cg08373605	0.00676357	-0.370701	0.445695	0.64769
CSMD1	chr8_3188775	cg08383399	-0.00700089	0.144556	0.395175	0.603774
CSMD1	chr8_3188775	cg08625617	-0.00214385	1.52053	0.888501	0.945011
CSMD1	chr8_3188775	cg08642111	-0.0035038	0.221888	0.698089	0.83648
CSMD1	chr8_3188775	cg09044665	0.010167	1.09131	0.625898	0.788635
CSMD1	chr8_3188775	cg09159022	0.00215876	0.239143	0.823224	0.91019
CSMD1	chr8_3188775	cg09539824	-0.000816701	0.283714	0.96976	0.985561
CSMD1	chr8_3188775	cg10290764	-0.000716619	-0.0160295	0.948451	0.975812
CSMD1	chr8_3188775	cg11003814	0.0157952	0.26605	0.411358	0.618086
CSMD1	chr8_3188775	cg11210374	-0.0164695	0.70158	0.432858	0.636374
CSMD1	chr8_3188775	cg11492932	-0.00534364	0.780981	0.776435	0.884616
CSMD1	chr8_3188775	cg11532179	-0.00087418	1.29529	0.955835	0.979039
CSMD1	chr8_3188775	cg11782250	-0.0022994	0.448278	0.846916	0.92306
CSMD1	chr8_3188775	cg11925907	0.0117358	1.32639	0.412497	0.618773
CSMD1	chr8_3188775	cg12027248	0.00313472	0.861381	0.865465	0.933233
CSMD1	chr8_3188775	cg12028740	-0.0102437	0.530919	0.574197	0.75161
CSMD1	chr8_3188775	cg12042060	-0.0143535	0.305617	0.283635	0.494554
CSMD1	chr8_3188775	cg12243864	-0.011517	0.727003	0.543661	0.727853
CSMD1	chr8_3188775	cg12258042	-0.00497592	0.174467	0.639171	0.797635
CSMD1	chr8_3188775	cg12269374	0.00668314	0.275397	0.623681	0.787121
CSMD1	chr8_3188775	cg12989342	-0.00167898	1.61427	0.909994	0.957144
CSMD1	chr8_3188775	cg14762856	0.00396792	-0.304476	0.734202	0.859684
CSMD1	chr8_3188775	cg14940233	-0.0173419	0.698884	0.148838	0.331269
CSMD1	chr8_3188775	cg15195541	0.0113709	0.477306	0.554802	0.735556
CSMD1	chr8_3188775	cg15237923	-0.00345413	0.0564289	0.650946	0.80542
CSMD1	chr8_3188775	cg15244965	0.00112143	0.781561	0.958249	0.979758
CSMD1	chr8_3188775	cg15908006	-0.000608975	-0.00788926	0.955631	0.978995
CSMD1	chr8_3188775	cg16761276	-0.000116555	-0.239075	0.980333	0.990687
CSMD1	chr8_3188775	cg16785381	0.000534814	0.734508	0.974392	0.987832
CSMD1	chr8_3188775	cg17001717	-0.00741644	0.570046	0.622305	0.786099
CSMD1	chr8_3188775	cg17102269	0.00358345	-0.492547	0.708036	0.84348
CSMD1	chr8_3188775	cg17817521	-0.0114288	0.576506	0.571471	0.749659
CSMD1	chr8_3188775	cg18317533	-0.0053146	0.216413	0.726324	0.855066
CSMD1	chr8_3188775	cg19849211	-0.00706672	0.440239	0.582209	0.757282
CSMD1	chr8_3188775	cg19884629	-0.00692193	1.33426	0.619519	0.783843
CSMD1	chr8_3188775	cg19923622	-0.0166919	1.06594	0.347717	0.558817
CSMD1	chr8_3188775	cg20564969	0.00167748	-0.306061	0.766264	0.878745
CSMD1	chr8_3188775	cg20911707	-0.00451855	0.736491	0.82265	0.909892
CSMD1	chr8_3188775	cg20912923	-0.0106434	1.30764	0.524543	0.713004
CSMD1	chr8_3188775	cg20934731	-0.00133108	0.90328	0.901631	0.952679
CSMD1	chr8_3188775	cg22016513	0.00704141	2.13494	0.771318	0.88146
CSMD1	chr8_3188775	cg22619018	-0.00802886	0.204397	0.451439	0.652757
CSMD1	chr8_3188775	cg22663467	-0.0133108	1.0547	0.505813	0.698489
CSMD1	chr8_3188775	cg22726414	-0.0238477	1.23025	0.22594	0.430186
CSMD1	chr8_3188775	cg22911315	-0.0160121	1.34258	0.498239	0.692594
CSMD1	chr8_3188775	cg23154832	-0.0026887	0.460246	0.868947	0.935071
CSMD1	chr8_3188775	cg23345631	0.00416743	1.10563	0.790642	0.892705
CSMD1	chr8_3188775	cg23495279	-0.00431272	0.188423	0.581829	0.757069
CSMD1	chr8_3188775	cg23564432	-0.0137014	0.135929	0.246295	0.453868
CSMD1	chr8_3188775	cg23702644	-0.00321502	0.00346768	0.78559	0.889734
CSMD1	chr8_3188775	cg23818621	0.00243146	0.0681489	0.854694	0.927563
CSMD1	chr8_3188775	cg24327361	-0.00968655	0.760712	0.697599	0.836184
CSMD1	chr8_3188775	cg24477102	0.00187355	1.52816	0.892409	0.947504
CSMD1	chr8_3188775	cg25329377	0.00681036	0.994069	0.638044	0.796909
CSMD1	chr8_3188775	cg25338036	-0.0404389	1.74815	0.286832	0.497861
CSMD1	chr8_3188775	cg25766801	-0.00290482	0.537426	0.780183	0.886499
CSMD1	chr8_3188775	cg25956036	-0.00147371	-0.681226	0.812337	0.903926
CSMD1	chr8_3188775	cg26763877	-0.00454188	0.14477	0.675841	0.821875
CSMD1	chr8_3188775	cg26793019	-0.0114231	1.1165	0.589427	0.762227
CSMD1	chr8_3188775	cg26837853	-0.00371569	0.0312873	0.725598	0.854617
CSMD1	chr8_3188775	cg26852625	-0.0279123	1.38923	0.19843	0.396408
CSMD1	chr8_3188775	cg26957110	0.0118193	1.4985	0.515076	0.705809
CSMD1	chr8_3188775	cg27029018	-0.0124195	0.648311	0.549345	0.731815
CSMD1	chr8_3188775	cg27255656	0.00507907	0.200921	0.625252	0.788179
CSMD1	chr8_3188775	cg27258394	0.0267927	1.39149	0.340808	0.552424
CSMD1	chr8_3188775	cg27340648	-0.00272465	0.340086	0.885022	0.943238
CSMD1	chr8_3188775	ch_8_120035F	-0.00131771	-0.63532	0.851819	0.925559
RPRD1A	chr18_36031100	cg00019809	-0.00114979	-2.72984	0.979237	0.990025
RPRD1A	chr18_36031100	cg02901122	0.14217	-6.33346	1.30423e-05	0.000370901
RPRD1A	chr18_36031100	cg07064315	-0.0103541	1.41388	0.702185	0.839386
RPRD1A	chr18_36031100	cg13578932	0.0130376	-1.09159	0.250824	0.459416
RPRD1A	chr18_36031100	cg19175346	0.069931	-4.0579	0.0119728	0.0604664
RPRD1A	chr18_36031100	cg19629710	0.0611941	-3.58088	0.011725	0.0595855
RPRD1A	chr18_36031100	cg21459643	0.00627953	-0.842751	0.640279	0.798179
RPRD1A	chr18_36031100	cg21813303	0.0412814	-1.97608	0.00010676	0.00190191
RPRD1A	chr18_36031100	cg23956068	0.0438515	-2.5488	0.016502	0.0757807
RPRD1A	chr18_36031100	cg24095188	-0.00666997	0.488775	0.883363	0.942405
RPRD1A	chr18_36031100	ch_18_658499F	0.0586732	-2.18591	0.000888275	0.00922101
RBFOX1	chr16_7710845	cg00019838	-0.0112521	1.50342	0.753973	0.871436
RBFOX1	chr16_7710845	cg00036119	-0.00274816	0.016042	0.83536	0.916675
RBFOX1	chr16_7710845	cg00049883	0.0266111	-0.489685	0.196522	0.394216
RBFOX1	chr16_7710845	cg00099017	-0.00143873	0.922711	0.966381	0.983745
RBFOX1	chr16_7710845	cg00205756	-6.07914e-06	0.346814	0.99979	0.99985
RBFOX1	chr16_7710845	cg00470955	0.00468615	-0.133596	0.764349	0.877695
RBFOX1	chr16_7710845	cg00480381	-0.0499025	1.61838	0.130753	0.304783
RBFOX1	chr16_7710845	cg00491523	0.010246	-0.328643	0.366937	0.576548
RBFOX1	chr16_7710845	cg00499781	-0.0109427	2.40059	0.833136	0.915712
RBFOX1	chr16_7710845	cg00514665	0.0289065	2.17648	0.606346	0.774011
RBFOX1	chr16_7710845	cg00590139	0.00436558	0.0913657	0.884666	0.943069
RBFOX1	chr16_7710845	cg00691081	0.0518749	-0.0142747	0.205734	0.405263
RBFOX1	chr16_7710845	cg00768574	0.0358989	0.773214	0.151414	0.334665
RBFOX1	chr16_7710845	cg00853103	-0.0156435	0.263103	0.670954	0.819126
RBFOX1	chr16_7710845	cg00884800	0.00280131	-0.372741	0.768769	0.880101
RBFOX1	chr16_7710845	cg00962147	0.00104431	-0.0345494	0.914709	0.959576
RBFOX1	chr16_7710845	cg00982312	-0.007738	0.116842	0.747547	0.867749
RBFOX1	chr16_7710845	cg01050225	0.0484165	0.585483	0.0585351	0.180716
RBFOX1	chr16_7710845	cg01185766	-0.0230407	0.311983	0.287533	0.498402
RBFOX1	chr16_7710845	cg01421252	0.0322321	-0.218087	0.181628	0.375475
RBFOX1	chr16_7710845	cg01446270	-0.0194047	0.911528	0.564008	0.743088
RBFOX1	chr16_7710845	cg01577083	0.0167555	-0.0219424	0.630659	0.792265
RBFOX1	chr16_7710845	cg01597629	0.00549815	-0.292176	0.536709	0.721856
RBFOX1	chr16_7710845	cg01610605	-0.0545707	0.614878	0.00232867	0.0185714
RBFOX1	chr16_7710845	cg01680674	-0.00177725	-0.103066	0.919371	0.962147
RBFOX1	chr16_7710845	cg01862034	-0.0137265	1.44659	0.744138	0.865256
RBFOX1	chr16_7710845	cg01914555	-0.00740401	0.579209	0.656402	0.808897
RBFOX1	chr16_7710845	cg02008627	0.0357979	0.249747	0.379365	0.588055
RBFOX1	chr16_7710845	cg02042823	-0.0701925	2.18931	0.0114673	0.0586531
RBFOX1	chr16_7710845	cg02119348	-0.0219097	0.166651	0.129579	0.303361
RBFOX1	chr16_7710845	cg02217063	0.0503595	0.0642395	0.230644	0.435828
RBFOX1	chr16_7710845	cg02230017	-0.0736065	0.563085	0.147571	0.329174
RBFOX1	chr16_7710845	cg02236847	0.0102122	0.146913	0.619628	0.783907
RBFOX1	chr16_7710845	cg02657245	0.0786319	-0.143866	0.117143	0.285211
RBFOX1	chr16_7710845	cg02789526	-0.00126965	0.77919	0.941006	0.971873
RBFOX1	chr16_7710845	cg02862904	-0.0119869	-1.04335	0.271015	0.481086
RBFOX1	chr16_7710845	cg02909809	0.0147516	0.1318	0.559444	0.739092
RBFOX1	chr16_7710845	cg03072621	-0.0378858	0.306618	0.192177	0.388895
RBFOX1	chr16_7710845	cg03376340	0.0132612	0.263659	0.64747	0.803118
RBFOX1	chr16_7710845	cg03380809	0.0048288	0.836012	0.928727	0.966146
RBFOX1	chr16_7710845	cg03391464	0.0051016	-0.495807	0.743162	0.864862
RBFOX1	chr16_7710845	cg03529595	-0.0173621	1.12175	0.519221	0.708671
RBFOX1	chr16_7710845	cg03586879	-0.0390164	0.328879	0.0223077	0.0935794
RBFOX1	chr16_7710845	cg03623568	0.025854	-0.170138	0.409353	0.616156
RBFOX1	chr16_7710845	cg03804126	0.0400596	-0.123955	0.304449	0.516174
RBFOX1	chr16_7710845	cg03832015	0.0335226	-0.314879	0.0851833	0.231265
RBFOX1	chr16_7710845	cg03934713	-0.0120059	-0.114275	0.3912	0.599768
RBFOX1	chr16_7710845	cg03979510	0.00304911	0.801376	0.92946	0.96642
RBFOX1	chr16_7710845	cg03986562	0.0490934	2.29325	0.444846	0.647086
RBFOX1	chr16_7710845	cg03998719	-0.0252321	0.251874	0.214046	0.415978
RBFOX1	chr16_7710845	cg04006565	-0.00695959	1.40621	0.861918	0.931006
RBFOX1	chr16_7710845	cg04056343	-0.0393915	0.515611	0.475713	0.673851
RBFOX1	chr16_7710845	cg04214403	-0.0121853	1.8612	0.752552	0.870876
RBFOX1	chr16_7710845	cg04281344	0.0454751	0.260504	0.273211	0.48348
RBFOX1	chr16_7710845	cg04383979	0.0175769	-0.237112	0.412009	0.618457
RBFOX1	chr16_7710845	cg04671611	-0.0786527	1.04559	0.0263126	0.104612
RBFOX1	chr16_7710845	cg04862340	0.00766008	0.742725	0.747319	0.86765
RBFOX1	chr16_7710845	cg04892758	0.00300365	0.227325	0.868035	0.934628
RBFOX1	chr16_7710845	cg04928338	0.0261724	-0.13617	0.172344	0.362683
RBFOX1	chr16_7710845	cg04973802	-0.0404628	1.7414	0.261463	0.471112
RBFOX1	chr16_7710845	cg05107500	-0.0111095	-0.0722204	0.548904	0.731521
RBFOX1	chr16_7710845	cg05128194	0.000110144	-0.271009	0.99333	0.996353
RBFOX1	chr16_7710845	cg05364038	0.0319314	-0.22511	0.582858	0.757645
RBFOX1	chr16_7710845	cg05497273	0.0108362	0.232689	0.789109	0.891894
RBFOX1	chr16_7710845	cg05586863	0.0652631	-0.344439	0.0511472	0.164699
RBFOX1	chr16_7710845	cg06035708	0.0368341	-0.269983	0.147311	0.328835
RBFOX1	chr16_7710845	cg06212175	-0.00157176	0.0116417	0.967169	0.984177
RBFOX1	chr16_7710845	cg06233376	-0.0150999	0.2569	0.45281	0.653792
RBFOX1	chr16_7710845	cg06271387	-0.0169363	0.732097	0.499734	0.693607
RBFOX1	chr16_7710845	cg06332950	-0.0549093	1.60388	0.145016	0.325898
RBFOX1	chr16_7710845	cg06447474	-0.024041	1.48431	0.387213	0.595816
RBFOX1	chr16_7710845	cg06524192	-0.0126961	1.25795	0.737993	0.861625
RBFOX1	chr16_7710845	cg06560026	-0.0431132	1.22444	0.160701	0.347457
RBFOX1	chr16_7710845	cg06580966	0.00351347	-0.115609	0.739418	0.862538
RBFOX1	chr16_7710845	cg06705265	0.0174955	0.446741	0.653982	0.807266
RBFOX1	chr16_7710845	cg06719334	0.0152515	0.478091	0.665323	0.814886
RBFOX1	chr16_7710845	cg06844984	-0.00744235	1.88083	0.86411	0.932255
RBFOX1	chr16_7710845	cg06941009	-0.00330037	0.904148	0.905187	0.954451
RBFOX1	chr16_7710845	cg07027430	-0.00467438	0.284211	0.725828	0.854797
RBFOX1	chr16_7710845	cg07115206	-0.0230959	0.596245	0.450057	0.651619
RBFOX1	chr16_7710845	cg07196505	0.00945568	-0.186338	0.398264	0.606601
RBFOX1	chr16_7710845	cg07283511	0.00764967	-0.584891	0.324448	0.536269
RBFOX1	chr16_7710845	cg07530656	0.0355948	-0.23807	0.158636	0.3444
RBFOX1	chr16_7710845	cg07568233	-0.00331087	0.563848	0.930559	0.96705
RBFOX1	chr16_7710845	cg07849944	-0.0378237	0.526154	0.356157	0.56645
RBFOX1	chr16_7710845	cg07891288	-0.0497147	1.41079	0.112758	0.278038
RBFOX1	chr16_7710845	cg07936456	0.0113656	0.323495	0.750497	0.869736
RBFOX1	chr16_7710845	cg07944396	0.00211975	0.627972	0.958617	0.979867
RBFOX1	chr16_7710845	cg08015447	-0.0298577	0.231118	0.375759	0.584811
RBFOX1	chr16_7710845	cg08160063	0.0184829	0.39053	0.653732	0.807246
RBFOX1	chr16_7710845	cg08230268	0.0209312	0.090755	0.459099	0.658951
RBFOX1	chr16_7710845	cg08249698	0.0265795	-0.46357	0.141426	0.320598
RBFOX1	chr16_7710845	cg08255211	-0.00662756	0.905639	0.808155	0.902307
RBFOX1	chr16_7710845	cg08384913	-0.00350098	-0.672418	0.741034	0.863546
RBFOX1	chr16_7710845	cg08390979	0.0140632	0.418589	0.665794	0.815222
RBFOX1	chr16_7710845	cg08464831	0.0359935	1.81129	0.516781	0.707069
RBFOX1	chr16_7710845	cg08466740	-0.0235252	0.218441	0.2532	0.462297
RBFOX1	chr16_7710845	cg08545287	-0.0925053	0.774536	0.0149479	0.0707326
RBFOX1	chr16_7710845	cg08582701	-0.0210567	0.127949	0.213552	0.415359
RBFOX1	chr16_7710845	cg08661450	0.0574435	1.82224	0.150861	0.333914
RBFOX1	chr16_7710845	cg08809405	-0.0523739	0.808274	0.0479664	0.15811
RBFOX1	chr16_7710845	cg09141856	-0.0128824	1.37509	0.809193	0.902642
RBFOX1	chr16_7710845	cg09226888	0.00383523	-0.173154	0.687595	0.829194
RBFOX1	chr16_7710845	cg09424006	0.0450895	0.802148	0.526076	0.714096
RBFOX1	chr16_7710845	cg09508665	0.0259836	-0.154604	0.302572	0.513961
RBFOX1	chr16_7710845	cg09599971	-0.0108839	0.85483	0.675253	0.821459
RBFOX1	chr16_7710845	cg09683476	0.0369035	0.833663	0.20663	0.406589
RBFOX1	chr16_7710845	cg09696486	0.0158027	0.73447	0.679767	0.824528
RBFOX1	chr16_7710845	cg09790780	0.0151945	-0.151817	0.576687	0.753355
RBFOX1	chr16_7710845	cg10013324	0.0354826	0.141092	0.22188	0.425324
RBFOX1	chr16_7710845	cg10316291	-0.0114081	1.11925	0.717392	0.849963
RBFOX1	chr16_7710845	cg10338848	-0.031362	1.13083	0.362813	0.572795
RBFOX1	chr16_7710845	cg10413513	-0.0122809	0.853261	0.577412	0.753767
RBFOX1	chr16_7710845	cg12310850	0.00583582	-0.201961	0.760993	0.875684
RBFOX1	chr16_7710845	cg14642432	-0.010672	0.402295	0.710906	0.845715
RBFOX1	chr16_7710845	cg16396980	0.0320879	-0.0111253	0.230237	0.435307
RBFOX1	chr16_7710845	cg16427239	-0.015605	0.605313	0.214024	0.415978
RBFOX1	chr16_7710845	cg16696400	0.0137675	-0.373626	0.317012	0.529392
RBFOX1	chr16_7710845	cg16716449	0.00717345	-0.352173	0.754649	0.871818
RBFOX1	chr16_7710845	cg19378133	-0.061778	0.740717	0.0220961	0.0929361
RBFOX1	chr16_7710845	cg26488009	0.022723	1.43397	0.558551	0.738569
RBFOX1	chr16_7710845	cg27083740	-0.0256144	0.473602	0.0686305	0.200969
RBFOX1	chr16_7710845	cg27168998	0.00861251	-0.0402603	0.726008	0.854912
RBFOX1	chr16_7710845	cg27199384	-0.0160896	0.202466	0.72497	0.854246
RBFOX1	chr16_7710845	cg27256528	-0.00743736	-0.0223555	0.744134	0.865256
RBFOX1	chr16_7710845	cg27282264	-0.0132861	0.53274	0.552441	0.733886
RBFOX1	chr16_7710845	cg27376707	-0.0430418	0.788188	0.238192	0.44422
RBFOX1	chr16_7710845	cg27449328	-0.0254483	1.89988	0.541676	0.72613
RBFOX1	chr16_7710845	cg27547132	0.0674964	-0.83927	0.0133879	0.0652681
RBFOX1	chr16_7710845	cg27623406	-0.048101	1.59754	0.190803	0.387043
RBFOX1	chr16_7710845	ch_16_271253R	0.0133593	-1.34781	0.236145	0.441588
RBFOX1	chr16_7710845	ch_16_296248R	0.0211864	-0.811124	0.0750337	0.213405
RBFOX1	chr16_7710845	ch_16_5395104F	-0.0257263	-0.515969	0.242594	0.449386
RBFOX1	chr16_7710845	ch_16_5927259F	0.00344663	-0.970804	0.76226	0.876537
SREK1	chr5_66170197	cg00020405	0.0318781	-0.704419	0.340269	0.551925
SREK1	chr5_66170197	cg01941047	0.098747	-2.5228	0.0620827	0.188523
SREK1	chr5_66170197	cg02670133	0.00503384	-1.35577	0.898386	0.95088
SREK1	chr5_66170197	cg02704927	0.113478	-1.75869	0.0170028	0.0773028
SREK1	chr5_66170197	cg05902997	-0.0571213	-0.646932	0.608562	0.775621
SREK1	chr5_66170197	cg08345189	-0.0784492	0.999374	0.276221	0.48675
SREK1	chr5_66170197	cg09001528	0.00107139	-2.35781	0.992143	0.995887
SREK1	chr5_66170197	cg10822593	0.162003	-3.14516	0.00387646	0.0271585
SREK1	chr5_66170197	cg11353984	-0.0123498	-1.12049	0.82261	0.909892
SREK1	chr5_66170197	cg11497377	0.22616	-1.28653	0.0044144	0.0297155
SREK1	chr5_66170197	cg13944219	-0.0778364	0.0273592	0.325667	0.537413
SREK1	chr5_66170197	cg14787704	0.0486126	-0.263582	0.503109	0.696169
SREK1	chr5_66170197	cg15650694	-0.00869446	-1.05374	0.820894	0.908946
SREK1	chr5_66170197	cg16101703	0.0337704	-1.52783	0.304803	0.516441
SREK1	chr5_66170197	cg18011946	-0.00902686	-0.736471	0.847712	0.923194
SREK1	chr5_66170197	cg20418797	0.0932843	-2.26123	0.0994895	0.255717
SREK1	chr5_66170197	cg20913750	0.0727059	-1.72302	0.15713	0.342649
SREK1	chr5_66170197	cg21114390	-0.247922	0.776459	0.00604822	0.0371251
SREK1	chr5_66170197	cg21977218	0.0377878	0.62277	0.5795	0.75552
SREK1	chr5_66170197	cg23438810	-0.0104303	-0.308319	0.752507	0.870876
SREK1	chr5_66170197	cg25928955	0.0613487	-1.31218	0.0485417	0.159297
TAF15	chr17_35834733	cg00021527	0.0298257	-1.72072	0.0030395	0.0225857
TAF15	chr17_35834733	cg00024382	-0.115847	2.58955	4.95945e-07	2.77197e-05
TAF15	chr17_35834733	cg00151914	-0.062103	1.19999	5.17921e-05	0.00108237
TAF15	chr17_35834733	cg00248828	0.0117333	0.319812	0.551904	0.733582
TAF15	chr17_35834733	cg00315853	0.00753349	0.25228	0.60108	0.770674
TAF15	chr17_35834733	cg01059047	-0.00288565	0.204192	0.648201	0.803614
TAF15	chr17_35834733	cg01062519	0.00813998	-0.769216	0.347701	0.558817
TAF15	chr17_35834733	cg01063615	0.0566468	-0.918453	0.000727546	0.00802373
TAF15	chr17_35834733	cg01134296	0.0174227	-1.00059	0.00479551	0.0314607
TAF15	chr17_35834733	cg01622018	0.00521037	-0.190771	0.694613	0.833808
TAF15	chr17_35834733	cg02022384	-0.00163775	0.700145	0.882919	0.942244
TAF15	chr17_35834733	cg02278073	-0.0309566	0.469342	0.0114953	0.0587586
TAF15	chr17_35834733	cg02505674	-0.0407599	2.53195	0.161616	0.348734
TAF15	chr17_35834733	cg02517519	-0.0438762	4.20877	0.344933	0.556315
TAF15	chr17_35834733	cg02637741	-0.0184858	1.2326	0.200114	0.398433
TAF15	chr17_35834733	cg02927346	-0.0554043	1.41969	0.00071142	0.00787598
TAF15	chr17_35834733	cg02980604	-0.034239	0.992481	0.00231361	0.0185044
TAF15	chr17_35834733	cg03421926	0.00820326	0.187147	0.204414	0.403738
TAF15	chr17_35834733	cg03484160	0.0053513	1.13247	0.772937	0.882508
TAF15	chr17_35834733	cg04578738	0.0456348	-1.8338	0.000345334	0.00458317
TAF15	chr17_35834733	cg04790749	-0.0417338	1.24801	0.117574	0.285761
TAF15	chr17_35834733	cg04880940	0.0158367	0.483617	0.283378	0.494266
TAF15	chr17_35834733	cg04932840	-0.0120924	-0.312121	0.53622	0.721528
TAF15	chr17_35834733	cg05065686	-0.146245	2.10782	0.00407446	0.0280895
TAF15	chr17_35834733	cg05173913	0.0258287	-0.938005	0.36473	0.574521
TAF15	chr17_35834733	cg05270866	-0.0181773	1.15736	0.229985	0.434978
TAF15	chr17_35834733	cg06350203	-0.189694	6.85616	0.000727897	0.00802373
TAF15	chr17_35834733	cg06576742	-0.0186637	0.714004	0.114423	0.280888
TAF15	chr17_35834733	cg07330075	-0.00714627	0.366125	0.618211	0.782977
TAF15	chr17_35834733	cg07546558	0.00668588	-1.61113	0.577953	0.754212
TAF15	chr17_35834733	cg08867439	0.0256905	-1.53158	0.000440753	0.00549489
TAF15	chr17_35834733	cg08876508	0.0163187	-0.242114	0.233739	0.439334
TAF15	chr17_35834733	cg09144769	-0.0016964	0.430521	0.820954	0.908952
TAF15	chr17_35834733	cg09730211	0.00517479	-1.3153	0.378732	0.587345
TAF15	chr17_35834733	cg09807148	-0.00233635	-0.750947	0.935333	0.96929
TAF15	chr17_35834733	cg10016608	0.0144484	-0.627933	0.00655383	0.0393584
TAF15	chr17_35834733	cg10538320	0.016149	-1.29814	0.181724	0.375615
TAF15	chr17_35834733	cg10561323	-0.0687493	2.61056	0.00931937	0.0506026
TAF15	chr17_35834733	cg10747529	0.0191277	-0.544577	0.228626	0.433269
TAF15	chr17_35834733	cg11649068	-0.0101215	-0.64515	0.59015	0.762748
TAF15	chr17_35834733	cg11723896	0.0250328	-1.19715	4.93566e-05	0.00103995
TAF15	chr17_35834733	cg11830880	0.0288431	-1.48692	0.00699563	0.0413726
TAF15	chr17_35834733	cg11915366	0.036026	-0.230508	0.0408632	0.141432
TAF15	chr17_35834733	cg11992940	0.0352506	-0.894564	0.00145894	0.0133188
TAF15	chr17_35834733	cg12315363	0.0187603	-0.984664	0.0398684	0.139068
TAF15	chr17_35834733	cg12601400	0.0285198	-1.80667	0.00277002	0.0211107
TAF15	chr17_35834733	cg12700449	0.00710975	-0.34461	0.58202	0.757176
TAF15	chr17_35834733	cg12786490	0.00988118	1.213	0.473277	0.671514
TAF15	chr17_35834733	cg12901634	0.0152291	-1.112	0.0156551	0.0730957
TAF15	chr17_35834733	cg13326172	-0.0119942	-1.84101	0.518889	0.708604
TAF15	chr17_35834733	cg13376404	-0.0201346	-0.196121	0.0847023	0.230448
TAF15	chr17_35834733	cg13998712	-0.177438	5.91577	0.00700759	0.0413969
TAF15	chr17_35834733	cg14527050	0.000278254	-0.725045	0.994216	0.99679
TAF15	chr17_35834733	cg14589810	-0.0289103	1.60448	0.00756894	0.0436524
TAF15	chr17_35834733	cg14622441	-0.0881219	1.71987	0.00102848	0.0102393
TAF15	chr17_35834733	cg14777574	0.0157391	-1.04407	0.0213621	0.09086
TAF15	chr17_35834733	cg15096461	-0.0251149	1.47876	0.156695	0.341926
TAF15	chr17_35834733	cg16246294	0.00807372	-1.48564	0.491596	0.68726
TAF15	chr17_35834733	cg16323231	-0.223789	7.53526	0.000168346	0.00265775
TAF15	chr17_35834733	cg17000593	-0.029731	1.34451	0.17552	0.367223
TAF15	chr17_35834733	cg17190117	-0.00814755	0.248963	0.453732	0.654523
TAF15	chr17_35834733	cg17314478	0.0104195	-0.1382	0.536333	0.721528
TAF15	chr17_35834733	cg17579753	0.00236907	-0.0882902	0.859129	0.929621
TAF15	chr17_35834733	cg17757575	-0.0208587	0.801284	0.0752654	0.213859
TAF15	chr17_35834733	cg18391427	0.0292133	-1.55097	0.00285724	0.0215995
TAF15	chr17_35834733	cg19047068	-0.114959	3.95889	0.000185281	0.00286142
TAF15	chr17_35834733	cg19408882	0.00770874	-0.260749	0.403216	0.610987
TAF15	chr17_35834733	cg19563062	-0.0152475	2.94241	0.596873	0.767655
TAF15	chr17_35834733	cg20496643	-0.0434326	0.693875	0.000264793	0.00374715
TAF15	chr17_35834733	cg20876003	-0.0229268	1.78513	0.305717	0.517403
TAF15	chr17_35834733	cg20976581	0.00228209	0.0240711	0.753978	0.871436
TAF15	chr17_35834733	cg23117191	-0.0261202	-0.841579	0.110786	0.274692
TAF15	chr17_35834733	cg23451251	0.0169037	-0.406329	0.130359	0.304193
TAF15	chr17_35834733	cg24149295	-0.0445238	0.196184	0.0572998	0.178073
TAF15	chr17_35834733	cg24613923	0.00906246	-1.4315	0.324636	0.536396
TAF15	chr17_35834733	cg24922045	0.0143749	-0.452922	0.119352	0.288649
TAF15	chr17_35834733	cg25172682	0.0148701	-1.1074	0.338661	0.550263
TAF15	chr17_35834733	cg25309759	-0.00271882	0.0399168	0.837826	0.91785
TAF15	chr17_35834733	cg25579860	0.00814856	0.344904	0.340493	0.552081
TAF15	chr17_35834733	cg26015356	0.0534799	-0.342009	0.0011635	0.0112581
TAF15	chr17_35834733	cg26586920	-0.000860069	0.592737	0.91928	0.962082
TAF15	chr17_35834733	cg27488674	0.0336727	0.276836	0.0570255	0.177403
UBR1	chr15_43015642	cg00021783	0.00172419	-0.685809	0.870967	0.935744
UBR1	chr15_43015642	cg01035804	-0.0403653	1.17856	0.0892093	0.238216
UBR1	chr15_43015642	cg01038861	-0.0396413	1.50311	0.0394077	0.137908
UBR1	chr15_43015642	cg02376269	0.0252681	-1.7404	0.218133	0.421464
UBR1	chr15_43015642	cg03002480	0.0310689	-2.19161	0.274008	0.484231
UBR1	chr15_43015642	cg06721031	0.0164322	-0.995026	0.176145	0.367971
UBR1	chr15_43015642	cg07317608	0.00823114	-0.364044	0.627653	0.790048
UBR1	chr15_43015642	cg07607462	0.0119484	-0.906745	0.43594	0.639057
UBR1	chr15_43015642	cg21590616	0.0483799	-1.78559	6.35783e-05	0.00127894
UBR1	chr15_43015642	cg22877428	0.0380878	-0.871254	0.00013799	0.00230296
UBR1	chr15_43015642	cg23701314	-0.00234259	-0.161887	0.901872	0.952737
UBR1	chr15_43015642	cg26161015	0.062216	-2.24508	6.12776e-06	0.000204888
UBR1	chr15_43015642	cg26186901	0.0439765	-2.70073	0.0854939	0.231829
UBR1	chr15_43015642	ch_15_481908R	0.0298441	-0.796067	0.0401074	0.139607
ACSL5	chr10_112394905	cg00022688	0.0368304	-1.10567	0.126123	0.298454
ACSL5	chr10_112408299	cg00022688	0.0204797	-1.00159	0.156626	0.341871
ACSL5	chr10_112394905	cg02273922	0.0405012	-1.0231	0.00291745	0.0219563
ACSL5	chr10_112408299	cg02273922	0.00853268	-0.758442	0.280071	0.490754
ACSL5	chr10_112394905	cg02402091	-0.0618688	0.50364	0.00209058	0.0172039
ACSL5	chr10_112408299	cg02402091	-0.0393961	0.454908	0.00151787	0.0136917
ACSL5	chr10_112394905	cg02574374	-0.0603696	1.31337	0.107368	0.269108
ACSL5	chr10_112408299	cg02574374	-0.0264551	1.20325	0.268624	0.478832
ACSL5	chr10_112394905	cg03271650	0.013621	-0.782888	0.501824	0.695227
ACSL5	chr10_112408299	cg03271650	-0.0115216	-0.564648	0.361319	0.571572
ACSL5	chr10_112394905	cg04214573	0.0542417	-1.20804	0.000278853	0.00389808
ACSL5	chr10_112408299	cg04214573	0.0104074	-0.824981	0.252119	0.46093
ACSL5	chr10_112394905	cg04844987	0.0898369	-1.39379	0.000187231	0.00288351
ACSL5	chr10_112408299	cg04844987	0.00833794	-0.699112	0.571697	0.749665
ACSL5	chr10_112394905	cg11079635	-0.0240602	0.139035	0.328556	0.540493
ACSL5	chr10_112408299	cg11079635	-0.0262659	0.320173	0.0821244	0.225907
ACSL5	chr10_112394905	cg11152574	-0.316732	3.5835	7.5094e-08	6.14627e-06
ACSL5	chr10_112408299	cg11152574	-0.125413	2.38329	0.000574925	0.00674838
ACSL5	chr10_112394905	cg13333374	-0.0528619	0.511014	0.0163606	0.0752976
ACSL5	chr10_112408299	cg13333374	-0.0255976	0.344087	0.0386884	0.136279
ACSL5	chr10_112394905	cg13849691	-0.378233	4.25864	5.14755e-08	4.58489e-06
ACSL5	chr10_112408299	cg13849691	-0.134939	2.53473	0.00135482	0.0125821
ACSL5	chr10_112394905	cg16066219	-0.0173116	-0.0819465	0.353657	0.56417
ACSL5	chr10_112408299	cg16066219	-0.0239472	0.0742698	0.0292065	0.112451
ACSL5	chr10_112394905	cg16920551	0.0578198	-0.977457	3.37021e-05	0.000787297
ACSL5	chr10_112408299	cg16920551	0.00676162	-0.533107	0.437843	0.640865
ACSL5	chr10_112394905	cg18733757	0.00322681	-0.376495	0.81463	0.905139
ACSL5	chr10_112408299	cg18733757	-0.00975276	-0.205933	0.291999	0.502866
ACSL5	chr10_112394905	cg20204476	0.00486271	1.39979	0.875199	0.937785
ACSL5	chr10_112408299	cg20204476	-0.00333547	1.47427	0.855397	0.927957
ACSL5	chr10_112394905	cg20707765	-0.00721994	0.0336339	0.752237	0.870848
ACSL5	chr10_112408299	cg20707765	-0.0182399	0.261297	0.196253	0.393944
ACSL5	chr10_112394905	cg25780389	-0.0102374	-0.240992	0.66991	0.818525
ACSL5	chr10_112408299	cg25780389	-0.0347799	0.156798	0.018491	0.0821846
LRPPRC	chr2_43934716	cg00023288	0.0320758	-0.843945	0.0329675	0.122323
LRPPRC	chr2_43934716	cg01913188	-0.0360031	-0.480476	0.0298659	0.114312
LRPPRC	chr2_43934716	cg02219016	0.0281892	-0.990447	0.0561263	0.17574
LRPPRC	chr2_43934716	cg05369920	0.0135914	-0.786579	0.185188	0.379863
LRPPRC	chr2_43934716	cg07211050	-0.0402042	-1.26053	0.254723	0.463755
LRPPRC	chr2_43934716	cg08781755	0.0223547	0.720945	0.293722	0.504756
LRPPRC	chr2_43934716	cg11427928	-0.109158	2.46658	0.0517124	0.165734
LRPPRC	chr2_43934716	cg13721560	0.0271007	-0.971521	0.135017	0.310936
LRPPRC	chr2_43934716	cg14163061	-0.0296131	-0.898298	0.321721	0.533474
LRPPRC	chr2_43934716	cg15262336	0.00882318	-0.71201	0.413485	0.619642
LRPPRC	chr2_43934716	cg16140139	-0.0110473	1.40181	0.64926	0.80426
LRPPRC	chr2_43934716	cg24905248	0.0516453	0.00247557	0.00400672	0.0277546
LRPPRC	chr2_43934716	cg26534856	-0.0227409	-2.45961	0.745725	0.866526
LRPPRC	chr2_43934716	cg26538116	0.0266893	-0.914807	0.15358	0.337766
LRPPRC	chr2_43934716	cg27011534	0.00158806	-0.970697	0.929661	0.966548
LRPPRC	chr2_43934716	ch_2_1056241F	0.041312	-0.854272	0.000228119	0.00334114
SLC20A2	chr8_42437613	cg00025347	0.0908984	-0.880988	0.0476627	0.15747
SLC20A2	chr8_42437613	cg00409552	0.0833522	0.299003	0.0038256	0.0268631
SLC20A2	chr8_42437613	cg01510626	-0.123816	0.360149	0.0151873	0.071528
SLC20A2	chr8_42437613	cg02641676	-0.00439735	-0.155186	0.708153	0.843521
SLC20A2	chr8_42437613	cg03562592	0.0557829	0.399578	0.18379	0.377856
SLC20A2	chr8_42437613	cg03612649	-0.0102847	1.12462	0.758966	0.874379
SLC20A2	chr8_42437613	cg04025550	0.0100648	1.26255	0.799941	0.897983
SLC20A2	chr8_42437613	cg05561775	-0.0878696	2.96552	0.00713836	0.0419462
SLC20A2	chr8_42437613	cg05937663	-0.0578016	2.55587	0.128819	0.302343
SLC20A2	chr8_42437613	cg06752270	0.0416264	-1.67587	0.00999569	0.0532848
SLC20A2	chr8_42437613	cg07588263	0.0496949	-3.46175	0.494506	0.689592
SLC20A2	chr8_42437613	cg08448494	0.0344476	-1.55162	0.0302171	0.115158
SLC20A2	chr8_42437613	cg09056639	0.0495253	0.139696	0.15375	0.337977
SLC20A2	chr8_42437613	cg09526048	0.00244906	-0.683998	0.853514	0.926812
SLC20A2	chr8_42437613	cg09913449	0.0405181	0.505895	0.181147	0.374829
SLC20A2	chr8_42437613	cg10308027	-0.0533486	2.55522	0.177439	0.369844
SLC20A2	chr8_42437613	cg10423743	-0.0600246	2.41196	0.102322	0.260472
SLC20A2	chr8_42437613	cg10806146	0.0521664	-0.843592	0.0872236	0.234831
SLC20A2	chr8_42437613	cg11947423	0.0103711	1.41864	0.728709	0.856312
SLC20A2	chr8_42437613	cg12990392	0.0062187	-1.45618	0.65414	0.807351
SLC20A2	chr8_42437613	cg14335429	-0.028987	1.17595	0.337963	0.549664
SLC20A2	chr8_42437613	cg14408969	0.0453612	-1.70178	0.000932699	0.00956019
SLC20A2	chr8_42437613	cg14551279	-0.0116553	0.974973	0.566431	0.745318
SLC20A2	chr8_42437613	cg15685762	0.0954729	-0.478488	0.0119452	0.060382
SLC20A2	chr8_42437613	cg15936066	0.0199396	-0.0777058	0.415651	0.621546
SLC20A2	chr8_42437613	cg16236303	0.0240029	-1.78097	0.187295	0.382771
SLC20A2	chr8_42437613	cg17999393	-0.00321454	1.17893	0.939071	0.97112
SLC20A2	chr8_42437613	cg18334848	0.0665573	0.0643487	0.128784	0.302312
SLC20A2	chr8_42437613	cg18501945	0.0206662	1.22595	0.621014	0.785004
SLC20A2	chr8_42437613	cg19504179	0.0770476	-0.368072	0.0408591	0.141432
SLC20A2	chr8_42437613	cg20370839	-0.0171062	2.20472	0.59048	0.763085
SLC20A2	chr8_42437613	cg21154041	0.0266471	0.958393	0.364314	0.574161
SLC20A2	chr8_42437613	cg21189492	-0.136	3.93771	0.0166501	0.0761777
SLC20A2	chr8_42437613	cg21921016	-0.0119847	0.629131	0.694591	0.833808
SLC20A2	chr8_42437613	cg22855020	0.0515989	-0.677879	0.229779	0.434737
SLC20A2	chr8_42437613	cg22874695	0.0277053	-1.5396	0.0504981	0.163399
SLC20A2	chr8_42437613	cg23583580	-0.0243975	-1.14065	0.369002	0.578483
SLC20A2	chr8_42437613	cg24129600	-0.0369495	0.804864	0.270267	0.480398
SLC20A2	chr8_42437613	cg24353706	-0.00221596	1.05441	0.946541	0.974719
SLC20A2	chr8_42437613	cg25168729	-0.0332106	-0.547649	0.196217	0.393902
SLC20A2	chr8_42437613	cg26696906	-0.0453937	2.86127	0.154092	0.338462
DNAH10	chr12_123757912	cg00026119	-0.0918914	3.08962	0.00334426	0.0242771
DNAH10	chr12_123881604	cg00026119	-0.0812939	2.90574	0.224679	0.428724
DNAH10	chr12_123757912	cg00084347	0.00878946	-0.118713	0.199304	0.397463
DNAH10	chr12_123881604	cg00084347	-0.00298819	0.0337237	0.833978	0.916148
DNAH10	chr12_123757912	cg00107285	-0.0243756	0.716267	0.302548	0.513961
DNAH10	chr12_123881604	cg00107285	-0.0595731	1.08818	0.198774	0.396829
DNAH10	chr12_123757912	cg01172345	-0.0423822	1.52467	0.197439	0.395163
DNAH10	chr12_123881604	cg01172345	-0.00657618	1.111	0.922565	0.96331
DNAH10	chr12_123757912	cg01224393	-0.0939911	1.83921	0.0732328	0.210051
DNAH10	chr12_123881604	cg01224393	-0.148058	2.41988	0.175847	0.367631
DNAH10	chr12_123757912	cg01240444	-0.0425772	-0.221699	0.00095587	0.00970791
DNAH10	chr12_123881604	cg01240444	-0.0285877	-0.397341	0.299703	0.510729
DNAH10	chr12_123757912	cg01493783	-0.0220197	1.39048	0.195422	0.392849
DNAH10	chr12_123881604	cg01493783	0.0331057	0.729472	0.363664	0.573407
DNAH10	chr12_123757912	cg01812919	-0.0287732	1.1407	0.334282	0.546344
DNAH10	chr12_123881604	cg01812919	-0.0177017	0.945791	0.768304	0.879997
DNAH10	chr12_123757912	cg01923881	0.0645103	0.0591776	1.49563e-05	0.000413809
DNAH10	chr12_123881604	cg01923881	0.0364309	0.428556	0.234675	0.440083
DNAH10	chr12_123757912	cg02070232	-0.0236279	0.876661	0.227942	0.432341
DNAH10	chr12_123881604	cg02070232	0.0447125	0.0621781	0.271042	0.481108
DNAH10	chr12_123757912	cg02823783	-0.131091	-0.0160073	5.13332e-05	0.00107488
DNAH10	chr12_123881604	cg02823783	-0.159094	0.339557	0.017842	0.0800582
DNAH10	chr12_123757912	cg03151529	0.00301927	-0.183467	0.712918	0.846868
DNAH10	chr12_123881604	cg03151529	-0.0176866	0.0530629	0.27237	0.482488
DNAH10	chr12_123757912	cg03313451	-0.0554435	2.78305	0.158544	0.344335
DNAH10	chr12_123881604	cg03313451	-0.065052	2.89562	0.420451	0.625717
DNAH10	chr12_123757912	cg03785426	0.0271506	-0.219909	0.0270565	0.106563
DNAH10	chr12_123881604	cg03785426	0.0784229	-0.844255	0.00181042	0.0155235
DNAH10	chr12_123757912	cg05615595	-0.0614125	1.13713	0.00047916	0.00588344
DNAH10	chr12_123881604	cg05615595	-0.0414584	0.856017	0.263756	0.473627
DNAH10	chr12_123757912	cg05851395	-0.031294	0.675351	0.0507813	0.163949
DNAH10	chr12_123881604	cg05851395	-0.0301588	0.654901	0.362626	0.572725
DNAH10	chr12_123757912	cg06745944	-0.0404121	-0.444526	0.00523649	0.0334183
DNAH10	chr12_123881604	cg06745944	-0.014017	-0.756607	0.652681	0.806636
DNAH10	chr12_123757912	cg07347092	-0.15402	0.178414	6.8856e-06	0.000222909
DNAH10	chr12_123881604	cg07347092	-0.154909	0.191647	0.0311487	0.117643
DNAH10	chr12_123757912	cg07784986	-0.0150833	0.542446	0.412126	0.618496
DNAH10	chr12_123881604	cg07784986	0.033811	-0.0587856	0.392128	0.600578
DNAH10	chr12_123757912	cg09372386	-0.123631	2.04382	0.00026148	0.00371214
DNAH10	chr12_123881604	cg09372386	-0.103929	1.8285	0.13105	0.305325
DNAH10	chr12_123757912	cg10036003	-0.103286	1.25009	3.92255e-09	5.68122e-07
DNAH10	chr12_123881604	cg10036003	-0.0412863	0.487817	0.254514	0.463628
DNAH10	chr12_123757912	cg10575376	-0.0860695	-0.513838	0.000831623	0.00881139
DNAH10	chr12_123881604	cg10575376	-0.0154844	-1.37076	0.777941	0.885188
DNAH10	chr12_123757912	cg10796568	-0.0124558	1.21063	0.59082	0.763121
DNAH10	chr12_123881604	cg10796568	0.0108522	0.858136	0.817606	0.906815
DNAH10	chr12_123757912	cg10902909	0.0271281	-0.441302	0.0023599	0.01878
DNAH10	chr12_123881604	cg10902909	0.0704478	-0.959154	0.000154687	0.00250751
DNAH10	chr12_123757912	cg11026555	-0.166546	0.309522	1.20133e-06	5.51983e-05
DNAH10	chr12_123881604	cg11026555	-0.207244	0.753983	0.00300619	0.0223817
DNAH10	chr12_123757912	cg11196544	-0.00382972	0.391315	0.780756	0.886857
DNAH10	chr12_123881604	cg11196544	0.0153021	0.174155	0.595719	0.766704
DNAH10	chr12_123757912	cg11549958	-0.0427507	0.854971	0.144999	0.325898
DNAH10	chr12_123881604	cg11549958	-0.174245	2.43148	0.0037018	0.0262193
DNAH10	chr12_123757912	cg11961642	-0.0350096	1.21727	0.0125802	0.0625696
DNAH10	chr12_123881604	cg11961642	-0.0197867	1.04788	0.472616	0.670891
DNAH10	chr12_123757912	cg12597309	0.00068158	-0.226763	0.930983	0.967242
DNAH10	chr12_123881604	cg12597309	0.012334	-0.374302	0.45752	0.657644
DNAH10	chr12_123757912	cg12702615	-0.0382567	0.630077	0.0126647	0.0628461
DNAH10	chr12_123881604	cg12702615	-0.00613804	0.190259	0.84677	0.922994
DNAH10	chr12_123757912	cg12906108	-0.171214	2.79435	0.00224988	0.0180859
DNAH10	chr12_123881604	cg12906108	-0.106584	2.07917	0.342375	0.553927
DNAH10	chr12_123757912	cg13568854	-0.0815854	1.69178	0.000947803	0.00964966
DNAH10	chr12_123881604	cg13568854	-0.103969	1.93444	0.0360074	0.130025
DNAH10	chr12_123757912	cg13579661	0.00451461	2.7236	0.833205	0.915758
DNAH10	chr12_123881604	cg13579661	-0.0143311	2.98389	0.751939	0.870781
DNAH10	chr12_123757912	cg14808040	0.0341345	-0.525441	0.000120933	0.00209057
DNAH10	chr12_123881604	cg14808040	0.0151483	-0.312438	0.400315	0.608462
DNAH10	chr12_123757912	cg15633096	0.0122309	0.263526	0.394216	0.602828
DNAH10	chr12_123881604	cg15633096	0.0335593	-0.0111942	0.266735	0.476714
DNAH10	chr12_123757912	cg15997315	0.00852135	0.290411	0.640715	0.798484
DNAH10	chr12_123881604	cg15997315	0.0456496	-0.203382	0.231751	0.437144
DNAH10	chr12_123757912	cg16111073	-0.0795365	2.07389	0.00160208	0.014224
DNAH10	chr12_123881604	cg16111073	-0.0982448	2.25304	0.0649393	0.19421
DNAH10	chr12_123757912	cg16353049	0.0451306	1.30276	0.0355453	0.128957
DNAH10	chr12_123881604	cg16353049	-0.0599846	2.50628	0.172362	0.362683
DNAH10	chr12_123757912	cg17211612	-0.139701	3.4247	0.0572785	0.178041
DNAH10	chr12_123881604	cg17211612	-0.110103	2.841	0.472259	0.670498
DNAH10	chr12_123757912	cg17562584	-0.055108	0.851349	0.000204808	0.00307738
DNAH10	chr12_123881604	cg17562584	-0.0441688	0.740129	0.154884	0.339528
DNAH10	chr12_123757912	cg18594669	-0.00269057	0.656271	0.870258	0.935434
DNAH10	chr12_123881604	cg18594669	0.036105	0.212799	0.28247	0.493194
DNAH10	chr12_123757912	cg19896347	0.010746	1.11604	0.705856	0.842144
DNAH10	chr12_123881604	cg19896347	-0.083793	2.39945	0.163086	0.350678
DNAH10	chr12_123757912	cg20079734	-0.0411947	1.52479	0.0344897	0.126313
DNAH10	chr12_123881604	cg20079734	-0.0832122	2.0703	0.037737	0.134119
DNAH10	chr12_123757912	cg20130615	-0.00627365	0.849142	0.552415	0.73388
DNAH10	chr12_123881604	cg20130615	-0.00504125	0.862426	0.82106	0.909038
DNAH10	chr12_123757912	cg20752847	-0.0108447	0.0354578	0.26913	0.479442
DNAH10	chr12_123881604	cg20752847	-0.010767	0.0210209	0.595613	0.766614
DNAH10	chr12_123757912	cg22036614	-0.0246539	0.85423	0.219214	0.422376
DNAH10	chr12_123881604	cg22036614	-0.0350796	0.905392	0.395195	0.603774
DNAH10	chr12_123757912	cg22135566	-0.0439734	0.60418	0.000274445	0.00384778
DNAH10	chr12_123881604	cg22135566	-0.0158424	0.285456	0.521848	0.710678
DNAH10	chr12_123757912	cg22457172	0.0107559	-0.268327	0.0900214	0.239635
DNAH10	chr12_123881604	cg22457172	0.00189056	-0.177207	0.882299	0.942084
DNAH10	chr12_123757912	cg22472488	0.0173909	0.241599	0.330546	0.542501
DNAH10	chr12_123881604	cg22472488	0.0599364	-0.322834	0.0963857	0.250511
DNAH10	chr12_123757912	cg23325240	0.0139563	0.100963	0.322401	0.534247
DNAH10	chr12_123881604	cg23325240	0.0295838	-0.114922	0.309159	0.521107
DNAH10	chr12_123757912	cg23523434	-0.00517152	1.24129	0.844125	0.921842
DNAH10	chr12_123881604	cg23523434	-0.0281745	1.57348	0.581832	0.757069
DNAH10	chr12_123757912	cg24284036	0.00809065	0.388227	0.751646	0.870626
DNAH10	chr12_123881604	cg24284036	0.0253152	0.183261	0.635793	0.795358
DNAH10	chr12_123757912	cg24978470	0.00248443	0.760747	0.922252	0.963164
DNAH10	chr12_123881604	cg24978470	-0.00631918	0.867393	0.90459	0.954141
DNAH10	chr12_123757912	cg26639596	0.0138409	-0.33902	0.0232896	0.0963636
DNAH10	chr12_123881604	cg26639596	-0.00482146	-0.12126	0.685119	0.827912
DNAH10	chr12_123757912	cg26986180	-0.0348926	-0.476365	0.0108573	0.0564327
DNAH10	chr12_123881604	cg26986180	0.0166755	-1.06927	0.570887	0.74907
DNAH10	chr12_123757912	cg27125645	-0.0222381	-0.268621	0.0491424	0.160595
DNAH10	chr12_123881604	cg27125645	-0.011247	-0.406531	0.651931	0.80601
DNAH10	chr12_123757912	cg27150598	0.0156399	0.631223	0.167031	0.356173
DNAH10	chr12_123881604	cg27150598	-0.010638	0.975246	0.643845	0.800827
COG6	chr13_39724484	cg00026919	-0.00232106	0.696767	0.939619	0.971234
COG6	chr13_39724484	cg06101725	-0.0403378	-1.2246	0.0159423	0.0740888
COG6	chr13_39724484	cg06848589	-0.0057808	-1.52198	0.724741	0.854072
COG6	chr13_39724484	cg07192243	0.0524353	0.345993	0.000269286	0.0037914
COG6	chr13_39724484	cg10667201	-0.0357514	-0.913616	0.00220643	0.0178834
COG6	chr13_39724484	cg12100109	0.0796601	0.154212	2.81564e-06	0.000111131
COG6	chr13_39724484	cg14845880	0.0259073	-0.970955	1.78764e-07	1.21933e-05
COG6	chr13_39724484	cg21142158	0.0253847	-0.987886	5.04734e-05	0.00106013
COG6	chr13_39724484	cg22053565	0.0554417	0.267757	0.000164041	0.00260836
COG6	chr13_39724484	cg22307230	-0.0145337	-1.29253	0.320272	0.532373
COG6	chr13_39724484	cg25321781	0.0173858	-1.31226	0.0193406	0.0848066
COG6	chr13_39724484	cg26701198	0.0134173	-0.902273	0.0480595	0.158213
FSIP1	chr15_39764032	cg00027995	0.00249248	0.50578	0.944525	0.974058
FSIP1	chr15_39764032	cg01585703	0.00554547	-1.0455	0.660444	0.811864
FSIP1	chr15_39764032	cg02038418	-0.0207744	1.53582	0.460635	0.660242
FSIP1	chr15_39764032	cg03013817	-0.00918737	-0.205114	0.427818	0.632583
FSIP1	chr15_39764032	cg03196766	-0.0292009	0.871165	0.32108	0.533174
FSIP1	chr15_39764032	cg10327302	0.0332485	-2.21304	0.226086	0.430267
FSIP1	chr15_39764032	cg10545738	0.0440189	0.322573	0.0308366	0.116837
FSIP1	chr15_39764032	cg13375187	0.0586533	0.0954006	0.12064	0.290667
FSIP1	chr15_39764032	cg14428590	0.0186704	-0.274183	0.161098	0.34797
FSIP1	chr15_39764032	cg15161296	0.000538194	1.06117	0.986076	0.993202
FSIP1	chr15_39764032	cg15324453	-0.00162434	-1.51647	0.924508	0.964134
FSIP1	chr15_39764032	cg15747848	-0.0303354	-0.537129	0.0392608	0.137567
FSIP1	chr15_39764032	cg17744835	-0.0296891	0.95331	0.174077	0.365282
FSIP1	chr15_39764032	cg18234606	0.0367661	0.109998	0.174903	0.366322
FSIP1	chr15_39764032	cg18724215	0.0280432	-0.978794	0.0644213	0.193311
FSIP1	chr15_39764032	cg18822411	0.00133339	-1.52882	0.958364	0.979776
FSIP1	chr15_39764032	cg19287857	0.00667239	-0.319238	0.659069	0.810773
FSIP1	chr15_39764032	cg21637050	0.0220046	-1.05047	0.122519	0.293306
FSIP1	chr15_39764032	cg22568860	0.0225677	1.16567	0.437876	0.640885
FSIP1	chr15_39764032	cg22761315	0.0248063	-0.713971	0.142248	0.32185
FSIP1	chr15_39764032	cg22936016	0.02965	-1.46005	0.0450622	0.151254
FSIP1	chr15_39764032	cg23089272	-0.0216429	-0.00956441	0.106509	0.267452
FSIP1	chr15_39764032	cg23170602	-0.0193223	1.57711	0.459933	0.659576
FSIP1	chr15_39764032	cg24476453	-0.0083895	-1.29908	0.651619	0.805759
FSIP1	chr15_39764032	cg25190465	0.0332624	-2.21333	0.156208	0.341287
FSIP1	chr15_39764032	cg25403635	-0.0227125	1.57213	0.474744	0.672941
FSIP1	chr15_39764032	cg26166170	0.00754605	0.98023	0.738376	0.861805
SLC44A4	chr6_31864580	cg00028757	0.0331734	2.31654	0.254549	0.463643
SLC44A4	chr6_31864580	cg00031491	-0.0142143	1.14578	0.308706	0.520636
SLC44A4	chr6_31864580	cg00123181	0.000289177	0.861133	0.98343	0.991947
SLC44A4	chr6_31864580	cg00179217	0.0553338	-0.946849	0.0398415	0.139003
SLC44A4	chr6_31864580	cg00397479	0.0147456	-0.257794	0.601869	0.771222
SLC44A4	chr6_31864580	cg01207036	-0.0168742	0.898361	0.154364	0.338792
SLC44A4	chr6_31864580	cg01347702	-0.00757572	0.0145774	0.352514	0.563076
SLC44A4	chr6_31864580	cg02252769	0.0164292	0.242853	0.287234	0.498091
SLC44A4	chr6_31864580	cg02721751	-0.0455552	1.5713	0.0354516	0.128699
SLC44A4	chr6_31864580	cg02775414	0.00476665	0.207821	0.665496	0.814977
SLC44A4	chr6_31864580	cg02867242	0.0365623	1.69254	0.202371	0.401081
SLC44A4	chr6_31864580	cg03045620	0.00604814	-0.257639	0.318595	0.530788
SLC44A4	chr6_31864580	cg03587557	0.022333	-0.953751	0.603674	0.772168
SLC44A4	chr6_31864580	cg04021562	0.00763238	-0.471519	0.129766	0.303607
SLC44A4	chr6_31864580	cg04261164	-0.0836293	2.15418	0.00030094	0.00412208
SLC44A4	chr6_31864580	cg04267000	0.0434012	2.25282	0.156517	0.341737
SLC44A4	chr6_31864580	cg04567302	-0.0126517	-0.0552013	0.187739	0.38335
SLC44A4	chr6_31864580	cg05686323	-0.0209409	0.532542	0.168362	0.357733
SLC44A4	chr6_31864580	cg05841219	0.0566555	0.364951	0.00436489	0.0295115
SLC44A4	chr6_31864580	cg07185041	-0.000802308	-0.101781	0.945778	0.974536
SLC44A4	chr6_31864580	cg07205860	0.0177654	0.957394	0.292051	0.502866
SLC44A4	chr6_31864580	cg07266533	-0.00195018	0.995239	0.881393	0.94166
SLC44A4	chr6_31864580	cg07357081	0.00395332	-0.185882	0.537004	0.722074
SLC44A4	chr6_31864580	cg07363637	-0.00568446	0.0133984	0.455288	0.65588
SLC44A4	chr6_31864580	cg07438099	-0.021055	0.679473	0.105048	0.265063
SLC44A4	chr6_31864580	cg07498938	-0.0196736	1.12757	0.207707	0.408039
SLC44A4	chr6_31864580	cg07546508	0.00447821	0.0253405	0.654795	0.807842
SLC44A4	chr6_31864580	cg07601645	0.0281983	-0.0735156	0.00495546	0.0322256
SLC44A4	chr6_31864580	cg07643404	-0.0117104	0.720772	0.35933	0.569431
SLC44A4	chr6_31864580	cg07705820	-0.00296768	0.621913	0.849468	0.924292
SLC44A4	chr6_31864580	cg07829740	-0.00815786	0.867264	0.482234	0.679591
SLC44A4	chr6_31864580	cg08506113	-0.00202727	1.09354	0.914726	0.959576
SLC44A4	chr6_31864580	cg08848598	-0.0379379	1.21336	0.0753825	0.214115
SLC44A4	chr6_31864580	cg09130091	0.015744	-0.0763875	0.186098	0.381258
SLC44A4	chr6_31864580	cg09153713	0.00224371	0.179685	0.811361	0.903509
SLC44A4	chr6_31864580	cg09298971	0.00158098	0.015056	0.925147	0.96427
SLC44A4	chr6_31864580	cg10017105	0.0784525	-0.231295	0.0278985	0.108747
SLC44A4	chr6_31864580	cg10095654	0.0124771	0.0483212	0.353682	0.56417
SLC44A4	chr6_31864580	cg10951325	-0.00282344	0.716304	0.719457	0.851384
SLC44A4	chr6_31864580	cg10969178	0.00188344	1.75419	0.916181	0.960287
SLC44A4	chr6_31864580	cg11191955	0.0101392	0.270412	0.517674	0.707831
SLC44A4	chr6_31864580	cg11312554	0.0286534	0.786631	0.132459	0.307554
SLC44A4	chr6_31864580	cg11637059	0.0346321	0.591718	0.107621	0.269472
SLC44A4	chr6_31864580	cg11640015	-0.00916055	0.823462	0.318899	0.531106
SLC44A4	chr6_31864580	cg11726150	-0.00218115	-0.192075	0.800891	0.898473
SLC44A4	chr6_31864580	cg11785183	0.00300411	0.131213	0.812348	0.903926
SLC44A4	chr6_31864580	cg11943056	-0.0151875	0.12572	0.126481	0.298998
SLC44A4	chr6_31864580	cg13691744	0.0287282	-0.64709	0.0278329	0.108606
SLC44A4	chr6_31864580	cg13975172	-0.0239128	1.16556	0.222148	0.425616
SLC44A4	chr6_31864580	cg14378924	0.0215687	-0.17904	0.0614232	0.187049
SLC44A4	chr6_31864580	cg15632826	0.000194978	-0.128409	0.992389	0.99596
SLC44A4	chr6_31864580	cg15821546	0.0171634	-0.340797	0.233424	0.438965
SLC44A4	chr6_31864580	cg16553272	-0.00930514	0.222556	0.355405	0.565659
SLC44A4	chr6_31864580	cg17012525	0.00200615	0.705664	0.861089	0.930651
SLC44A4	chr6_31864580	cg17353698	0.0396966	-0.876889	0.0776701	0.218176
SLC44A4	chr6_31864580	cg18263014	-0.0126364	0.975456	0.603796	0.772231
SLC44A4	chr6_31864580	cg18363192	0.0434292	-0.784278	0.142027	0.321513
SLC44A4	chr6_31864580	cg18445760	0.00701331	1.0856	0.567861	0.746557
SLC44A4	chr6_31864580	cg18856043	-0.0105328	-0.0353606	0.272918	0.4831
SLC44A4	chr6_31864580	cg18949702	0.00781401	0.497422	0.30427	0.515934
SLC44A4	chr6_31864580	cg19117051	0.00260265	-0.17963	0.793427	0.893864
SLC44A4	chr6_31864580	cg19117698	-0.00522485	0.605091	0.542292	0.726663
SLC44A4	chr6_31864580	cg19738463	0.00731035	-0.901626	0.850515	0.924927
SLC44A4	chr6_31864580	cg19770715	-0.000730648	0.550554	0.969405	0.9854
SLC44A4	chr6_31864580	cg19853440	0.00384145	0.461598	0.583398	0.757995
SLC44A4	chr6_31864580	cg19955284	0.0113451	0.521261	0.226914	0.431056
SLC44A4	chr6_31864580	cg20383155	0.0332439	-0.681593	0.197074	0.394717
SLC44A4	chr6_31864580	cg20498033	-0.0601572	1.58477	0.00591904	0.0365681
SLC44A4	chr6_31864580	cg20544437	0.050904	0.400927	0.00477899	0.031397
SLC44A4	chr6_31864580	cg20961940	0.0396449	-0.44382	0.000250697	0.00359877
SLC44A4	chr6_31864580	cg21009978	0.0338945	1.15027	0.0811385	0.224397
SLC44A4	chr6_31864580	cg21087321	0.0100081	0.613677	0.582882	0.757647
SLC44A4	chr6_31864580	cg21116447	0.0185547	-0.581962	0.551877	0.733575
SLC44A4	chr6_31864580	cg21399428	-0.00292512	0.730194	0.779121	0.885873
SLC44A4	chr6_31864580	cg21618695	0.00353705	0.718004	0.712358	0.846486
SLC44A4	chr6_31864580	cg22240884	-0.00462531	1.23783	0.796276	0.895801
SLC44A4	chr6_31864580	cg22336993	0.00848941	2.375	0.434708	0.637873
SLC44A4	chr6_31864580	cg22397673	0.00961947	0.351915	0.459	0.658891
SLC44A4	chr6_31864580	cg22458831	-0.00118636	0.835871	0.9152	0.959771
SLC44A4	chr6_31864580	cg22753340	0.0138839	-0.444345	0.711168	0.845848
SLC44A4	chr6_31864580	cg22872508	-0.0263691	1.35375	0.175789	0.367607
SLC44A4	chr6_31864580	cg22882121	0.0337967	-0.326164	0.0706092	0.205068
SLC44A4	chr6_31864580	cg23174932	-0.00572074	-0.250174	0.86793	0.934621
SLC44A4	chr6_31864580	cg23431175	0.00167077	-0.243958	0.787794	0.890983
SLC44A4	chr6_31864580	cg23701033	-0.00511803	0.228939	0.646742	0.802558
SLC44A4	chr6_31864580	cg24369466	-0.0161451	0.304835	0.433839	0.637136
SLC44A4	chr6_31864580	cg24490633	0.0287458	-0.287331	7.34226e-05	0.00142949
SLC44A4	chr6_31864580	cg24493649	-0.0065213	0.580463	0.791026	0.89288
SLC44A4	chr6_31864580	cg24529722	0.00655638	-0.276552	0.297505	0.508335
SLC44A4	chr6_31864580	cg24547575	0.0168955	-0.825953	0.378569	0.587259
SLC44A4	chr6_31864580	cg24707219	-0.00829506	0.0919107	0.335851	0.547734
SLC44A4	chr6_31864580	cg24732991	-0.0276053	1.12987	0.192527	0.38933
SLC44A4	chr6_31864580	cg25013052	0.0247664	0.220386	0.00474898	0.0312616
SLC44A4	chr6_31864580	cg25208582	-0.0198132	1.53635	0.298141	0.508898
SLC44A4	chr6_31864580	cg25368728	-0.012286	0.843664	0.551166	0.733069
SLC44A4	chr6_31864580	cg25560247	0.0375513	-0.48456	0.00487836	0.0318639
SLC44A4	chr6_31864580	cg25600103	0.008947	0.368528	0.20438	0.403738
SLC44A4	chr6_31864580	cg25644015	-0.0611236	1.4759	0.0198924	0.0865423
SLC44A4	chr6_31864580	cg26138846	0.0374692	-0.491903	0.0335627	0.123883
SLC44A4	chr6_31864580	cg26434400	-0.040117	2.07842	0.175937	0.367703
SLC44A4	chr6_31864580	cg26472225	0.0210098	-0.0915581	0.0557086	0.174891
SLC44A4	chr6_31864580	cg27003765	-0.00785487	-0.0776929	0.263192	0.473172
SLC44A4	chr6_31864580	cg27005847	-0.00957162	0.0767036	0.225572	0.42973
SLC44A4	chr6_31864580	cg27084746	0.0209654	-0.570182	0.563191	0.742364
SLC44A4	chr6_31864580	cg27257955	0.0228069	0.136518	0.140907	0.319879
SLC44A4	chr6_31864580	cg27347290	0.0379592	-0.778619	0.142367	0.321986
SLC44A4	chr6_31864580	cg27363691	-0.00741839	1.20142	0.747559	0.867749
SLC44A4	chr6_31864580	cg27587935	0.0187577	0.81325	0.360564	0.570843
DCTN2	chr12_57535462	cg00029397	-0.0112922	-0.401602	0.260203	0.469772
DCTN2	chr12_57535462	cg00750518	-0.0149251	0.0486016	0.392116	0.600578
DCTN2	chr12_57535462	cg03238639	-0.0306128	-0.575661	0.109894	0.273315
DCTN2	chr12_57535462	cg04036049	0.0149679	0.154374	0.473551	0.67176
DCTN2	chr12_57535462	cg04270799	0.0579414	-0.373618	0.0515126	0.165347
DCTN2	chr12_57535462	cg04319429	0.0556801	1.07877	0.176038	0.367847
DCTN2	chr12_57535462	cg04474265	-0.0236643	-1.33876	0.346461	0.557632
DCTN2	chr12_57535462	cg06569866	0.0556048	-2.60033	0.662246	0.81294
DCTN2	chr12_57535462	cg10058540	-0.0280474	-0.180962	0.0344029	0.126076
DCTN2	chr12_57535462	cg10616404	0.0413853	-1.09614	0.10407	0.263456
DCTN2	chr12_57535462	cg10651583	-0.00939147	-0.813118	0.743342	0.86492
DCTN2	chr12_57535462	cg11087358	-0.0227211	-0.304249	0.124161	0.295897
DCTN2	chr12_57535462	cg12515582	0.0260478	1.46431	0.503351	0.696285
DCTN2	chr12_57535462	cg16499474	-0.155127	1.87098	0.00549461	0.0345762
DCTN2	chr12_57535462	cg16834726	-0.0438562	1.01728	0.258638	0.468069
DCTN2	chr12_57535462	cg18628483	-0.0109988	0.0940363	0.670803	0.819126
DCTN2	chr12_57535462	cg19226593	-0.0187661	-0.62218	0.385592	0.594333
DCTN2	chr12_57535462	cg19323374	0.0358422	-0.605815	0.463278	0.662433
DCTN2	chr12_57535462	cg22842717	-0.0417746	0.92889	0.518903	0.708604
DCTN2	chr12_57535462	cg23186534	0.0166772	0.904461	0.731017	0.857701
DCTN2	chr12_57535462	cg23526712	-0.0184529	0.726619	0.440351	0.643348
DCTN2	chr12_57535462	cg23658045	-0.033342	-0.665702	0.149043	0.331564
DCTN2	chr12_57535462	cg23752828	-0.0312239	-0.0320267	0.156604	0.34186
DCTN2	chr12_57535462	cg24405617	0.0168898	-0.32265	0.652943	0.806751
DCTN2	chr12_57535462	cg25035376	0.00967866	0.0554027	0.735318	0.860241
KIF13A	chr6_17777384	cg00029619	0.0092568	1.31471	0.462897	0.662031
KIF13A	chr6_17777384	cg00069309	0.0122022	0.927672	0.171931	0.362217
KIF13A	chr6_17777384	cg00136279	0.0313156	1.73103	0.00259606	0.020182
KIF13A	chr6_17777384	cg00980293	0.00316409	-1.6491	0.752817	0.87097
KIF13A	chr6_17777384	cg01426125	-0.00867988	-0.0546772	0.0606478	0.185315
KIF13A	chr6_17777384	cg01691194	0.00473046	0.788615	0.525239	0.713513
KIF13A	chr6_17777384	cg02727079	0.0511437	-0.681932	0.000230341	0.00336836
KIF13A	chr6_17777384	cg03903268	0.0174138	0.824648	0.122502	0.293306
KIF13A	chr6_17777384	cg04767522	0.00535703	0.761626	0.460985	0.660488
KIF13A	chr6_17777384	cg05463027	0.0131787	-0.550812	5.14784e-06	0.000179565
KIF13A	chr6_17777384	cg05558330	0.0184816	0.41091	0.0112941	0.0580062
KIF13A	chr6_17777384	cg05874233	0.0193071	0.0542317	0.00443595	0.0298044
KIF13A	chr6_17777384	cg08248579	-0.0599148	0.174986	1.11433e-05	0.000329082
KIF13A	chr6_17777384	cg09723635	0.0285871	0.17345	0.0506555	0.16367
KIF13A	chr6_17777384	cg09728393	0.0263779	0.075194	0.00626385	0.0381744
KIF13A	chr6_17777384	cg10385929	-0.00225854	1.45487	0.801178	0.898588
KIF13A	chr6_17777384	cg10716309	0.00215383	-0.967797	0.69403	0.833631
KIF13A	chr6_17777384	cg11265468	-0.022231	-1.37014	0.00526436	0.0335501
KIF13A	chr6_17777384	cg11376457	0.0106908	1.17733	0.272857	0.483042
KIF13A	chr6_17777384	cg12662084	0.0446231	0.356945	0.00102113	0.0101813
KIF13A	chr6_17777384	cg13779963	0.01004	0.704946	0.257611	0.467044
KIF13A	chr6_17777384	cg15414930	0.0663143	-0.907185	2.57507e-07	1.63392e-05
KIF13A	chr6_17777384	cg18213495	0.0587137	-0.778251	4.85373e-05	0.00103051
KIF13A	chr6_17777384	cg18493214	0.0393171	0.0440377	1.05666e-08	1.25265e-06
KIF13A	chr6_17777384	cg19274676	0.0145964	-1.04092	0.0031928	0.0234656
KIF13A	chr6_17777384	cg19696583	0.00409292	-0.864002	0.338291	0.549964
KIF13A	chr6_17777384	cg20070618	0.00986727	0.748347	0.338302	0.549964
KIF13A	chr6_17777384	cg20211816	0.00516811	-0.593354	0.269909	0.480136
KIF13A	chr6_17777384	cg20894522	0.0152163	0.590142	0.031764	0.119118
KIF13A	chr6_17777384	cg21039878	0.00442963	1.37762	0.680033	0.824703
KIF13A	chr6_17777384	cg21725624	-0.00299088	-0.700824	0.514176	0.705127
KIF13A	chr6_17777384	cg22168321	0.00788551	-0.840167	0.0554315	0.174415
KIF13A	chr6_17777384	cg23792258	0.0190873	-1.18739	0.00220977	0.0178975
KIF13A	chr6_17777384	cg24662827	0.00789085	0.773228	0.411656	0.618235
KIF13A	chr6_17777384	cg25700513	0.0209805	0.395634	0.000773081	0.00835319
KIF13A	chr6_17777384	cg26573952	-0.00597009	-2.14146	0.646205	0.802116
ICA1	chr7_8143998	cg00030291	0.0245213	-1.08276	0.694394	0.833754
ICA1	chr7_8143998	cg00507727	-0.0408517	-0.926386	0.352395	0.563003
ICA1	chr7_8143998	cg03411270	-0.0366111	-0.98795	0.244267	0.451453
ICA1	chr7_8143998	cg05372578	-0.045059	-0.729817	0.08257	0.226739
ICA1	chr7_8143998	cg05434957	0.034947	-1.45251	0.167395	0.356699
ICA1	chr7_8143998	cg05822926	0.0358322	-0.905153	0.0215282	0.0913215
ICA1	chr7_8143998	cg07190543	0.183601	-0.970793	0.00603048	0.0370573
ICA1	chr7_8143998	cg10025432	-0.0168203	0.832819	0.582574	0.757453
ICA1	chr7_8143998	cg10798171	-0.00618502	-0.46157	0.789558	0.89219
ICA1	chr7_8143998	cg11837701	-0.0420077	0.653468	0.350031	0.56097
ICA1	chr7_8143998	cg13313430	0.137198	-0.598201	0.00456452	0.0304106
ICA1	chr7_8143998	cg13394022	-0.0155124	0.989849	0.829276	0.913565
ICA1	chr7_8143998	cg14362004	-0.138178	3.48587	0.0203792	0.0878913
ICA1	chr7_8143998	cg14430015	-0.00257016	0.00119582	0.948763	0.97587
ICA1	chr7_8143998	cg15413566	-0.0187657	-0.529394	0.624151	0.787471
ICA1	chr7_8143998	cg16379704	0.0294966	-0.779242	0.0739202	0.211331
ICA1	chr7_8143998	cg20022118	0.0908928	-0.591363	0.084243	0.229619
ICA1	chr7_8143998	cg20371765	0.0221577	-0.814639	0.383257	0.592244
ICA1	chr7_8143998	cg20641531	-0.114704	1.89744	0.0910728	0.241623
ICA1	chr7_8143998	cg20977170	-0.0177841	-1.17547	0.630859	0.792323
ICA1	chr7_8143998	cg21291881	0.0786735	-0.187192	0.0921909	0.243426
ICA1	chr7_8143998	cg23976336	-0.012259	0.934659	0.690223	0.83106
ICA1	chr7_8143998	cg25766425	0.00363616	-1.43307	0.874016	0.937115
ICA1	chr7_8143998	cg26804423	0.0268267	0.243904	0.461092	0.660527
ICA1	chr7_8143998	cg26826957	0.0257157	-0.359517	0.480574	0.678117
ICA1	chr7_8143998	cg26916658	0.103109	-0.327256	0.0147574	0.0700675
BABAM2	chr2_28241503	cg00031476	0.0243225	-0.927984	0.0893129	0.238429
BABAM2	chr2_28241503	cg00470044	-0.01522	-0.0282587	0.366688	0.576457
BABAM2	chr2_28241503	cg00521934	0.0378804	-1.21537	0.0143806	0.0686803
BABAM2	chr2_28241503	cg02759903	0.0173404	1.09143	0.441595	0.644544
BABAM2	chr2_28241503	cg02857312	0.0280777	0.869553	0.250024	0.458719
BABAM2	chr2_28241503	cg03177025	0.023227	-0.750894	0.0365656	0.1314
BABAM2	chr2_28241503	cg03833993	0.0345058	0.757183	0.137123	0.314352
BABAM2	chr2_28241503	cg03859915	0.0117157	-0.858712	0.488364	0.684441
BABAM2	chr2_28241503	cg03979539	0.0756188	-2.64708	0.0196689	0.0858584
BABAM2	chr2_28241503	cg04221355	0.0337958	-1.02677	0.0122875	0.0615612
BABAM2	chr2_28241503	cg05057534	0.146948	-1.11428	1.11822e-07	8.35202e-06
BABAM2	chr2_28241503	cg05075067	-0.0356084	-1.88735	0.422555	0.627755
BABAM2	chr2_28241503	cg05517527	-0.12201	1.54694	0.00287819	0.0217165
BABAM2	chr2_28241503	cg05883932	0.0291282	-1.27217	0.0480515	0.158202
BABAM2	chr2_28241503	cg05977376	-0.0151543	0.0802734	0.352715	0.563154
BABAM2	chr2_28241503	cg06168363	0.0319873	-1.27125	0.0314597	0.118376
BABAM2	chr2_28241503	cg06254729	-0.0233862	1.45373	0.49717	0.6916
BABAM2	chr2_28241503	cg06869899	-0.0251604	-1.80826	0.422764	0.627949
BABAM2	chr2_28241503	cg07291923	0.0109944	-0.520444	0.353105	0.56367
BABAM2	chr2_28241503	cg07927072	0.00932708	0.338066	0.432865	0.636374
BABAM2	chr2_28241503	cg08364093	0.0157185	-0.773088	0.499683	0.693607
BABAM2	chr2_28241503	cg09009506	0.0481023	0.982883	0.0898283	0.23924
BABAM2	chr2_28241503	cg10266196	0.042033	-2.31221	0.146686	0.328013
BABAM2	chr2_28241503	cg10446433	0.0467733	0.237048	0.0995168	0.255736
BABAM2	chr2_28241503	cg11906781	0.0221244	0.0886765	0.485996	0.68232
BABAM2	chr2_28241503	cg12886188	0.00779389	0.958306	0.803155	0.899499
BABAM2	chr2_28241503	cg13861527	0.0259405	0.906087	0.610998	0.777429
BABAM2	chr2_28241503	cg14001360	0.0406745	-0.851361	9.53202e-06	0.000288927
BABAM2	chr2_28241503	cg14305763	0.0216767	-1.2075	0.097802	0.25291
BABAM2	chr2_28241503	cg15078838	0.00800857	-0.335896	0.738942	0.862133
BABAM2	chr2_28241503	cg16185457	0.0125078	0.860456	0.700804	0.838338
BABAM2	chr2_28241503	cg16651262	-0.142466	1.90809	0.000350979	0.00463776
BABAM2	chr2_28241503	cg17836842	0.0657874	0.305721	0.00621355	0.0379234
BABAM2	chr2_28241503	cg17862837	-0.0410457	1.27438	0.179408	0.372393
BABAM2	chr2_28241503	cg18313116	0.0114281	-1.43124	0.345645	0.556884
BABAM2	chr2_28241503	cg18712919	-0.0303005	1.2447	0.220667	0.42404
BABAM2	chr2_28241503	cg20541505	0.0158048	0.516966	0.728654	0.856278
BABAM2	chr2_28241503	cg20591120	0.0199445	-0.335171	0.411874	0.618438
BABAM2	chr2_28241503	cg20657709	-0.0629966	1.72306	0.0593063	0.182353
BABAM2	chr2_28241503	cg22164916	-0.0236901	-2.33113	0.523209	0.711795
BABAM2	chr2_28241503	cg22864500	-0.000748008	-0.228869	0.959274	0.980115
BABAM2	chr2_28241503	cg23459424	0.0972395	-0.990537	1.01505e-05	0.000304901
BABAM2	chr2_28241503	cg23576092	0.0314555	0.610535	0.0918103	0.242767
BABAM2	chr2_28241503	cg25422678	0.0385802	0.0647361	0.0683462	0.2004
BABAM2	chr2_28241503	cg26251429	-0.0100623	-0.245394	0.732077	0.858514
BABAM2	chr2_28241503	cg27639613	-0.0495856	0.512212	0.0303238	0.115485
ALPK2	chr18_58607489	cg00031779	0.0333645	0.428428	0.329939	0.541746
ALPK2	chr18_58607489	cg00865541	0.0415387	-0.257774	0.231315	0.436552
ALPK2	chr18_58607489	cg02269083	0.0357058	-0.630353	0.118082	0.286493
ALPK2	chr18_58607489	cg07910680	-0.0017829	0.813213	0.955948	0.979039
ALPK2	chr18_58607489	cg14386193	0.00312376	0.233028	0.945399	0.974327
ALPK2	chr18_58607489	cg15210127	0.0663377	0.303408	0.165452	0.353871
ALPK2	chr18_58607489	cg15783800	0.00113442	0.429943	0.96105	0.981077
ALPK2	chr18_58607489	cg25407077	0.0203827	0.338996	0.664831	0.814612
ALPK2	chr18_58607489	cg27555092	-0.0593261	1.45781	0.120976	0.29108
ALPK2	chr18_58607489	cg27614534	0.0539827	0.267118	0.132773	0.308004
ATP5F1E	chr20_59028741	cg00032609	0.00544509	-0.442073	0.462862	0.662009
ATP5F1E	chr20_59036774	cg00032609	-0.0001961	-0.384249	0.98598	0.993153
ATP5F1E	chr20_59028741	cg01503881	-0.0484987	-1.36254	0.0473251	0.156647
ATP5F1E	chr20_59036774	cg01503881	-0.0816904	-0.963356	0.024128	0.0987531
ATP5F1E	chr20_59028741	cg01789728	-0.0474088	-1.3562	0.0893598	0.238429
ATP5F1E	chr20_59036774	cg01789728	-0.0849103	-0.918441	0.041916	0.143893
ATP5F1E	chr20_59028741	cg03539511	0.028243	-1.26272	0.013721	0.0662906
ATP5F1E	chr20_59036774	cg03539511	0.0329468	-1.32644	0.0572488	0.177965
ATP5F1E	chr20_59028741	cg11595749	0.054355	-1.39816	3.32781e-06	0.00012626
ATP5F1E	chr20_59036774	cg11595749	0.0460244	-1.34688	0.00870757	0.0481438
ATP5F1E	chr20_59028741	cg12937378	0.002009	-1.42464	0.882515	0.942164
ATP5F1E	chr20_59036774	cg12937378	-0.00421596	-1.35928	0.839089	0.918685
ATP5F1E	chr20_59028741	cg16152482	-0.0491048	-0.835667	0.0142685	0.0682529
ATP5F1E	chr20_59036774	cg16152482	-0.035341	-0.975575	0.23317	0.438704
ATP5F1E	chr20_59028741	cg16347018	-0.0121891	-1.12594	0.275126	0.485281
ATP5F1E	chr20_59036774	cg16347018	-0.0145445	-1.10494	0.384512	0.593414
ATP5F1E	chr20_59028741	cg18096620	-0.047198	-1.34249	0.28559	0.496533
ATP5F1E	chr20_59036774	cg18096620	-0.139563	-0.304922	0.0326377	0.121437
ATP5F1E	chr20_59028741	cg20623172	-0.032366	0.362834	0.0190088	0.0839037
ATP5F1E	chr20_59036774	cg20623172	-0.0328133	0.385911	0.114603	0.281136
ATP5F1E	chr20_59028741	cg22231620	0.0686623	0.153615	0.00644734	0.0389577
ATP5F1E	chr20_59036774	cg22231620	0.111062	-0.359486	0.00195771	0.0164146
ATP5F1E	chr20_59028741	cg23831021	-0.0652871	-0.919019	0.00648935	0.0391288
ATP5F1E	chr20_59036774	cg23831021	-0.0428403	-1.15129	0.214776	0.417008
ATP5F1E	chr20_59028741	cg24457521	-0.0219761	-1.08638	0.0822546	0.226118
ATP5F1E	chr20_59036774	cg24457521	-0.0187325	-1.12252	0.310489	0.522612
ATP5F1E	chr20_59028741	cg25630530	0.0111348	1.14704	0.66496	0.814698
ATP5F1E	chr20_59036774	cg25630530	-0.0139003	1.37129	0.716267	0.849229
ATP5F1E	chr20_59028741	cg25718604	0.0616325	0.317736	0.0106096	0.0554919
ATP5F1E	chr20_59036774	cg25718604	0.0433538	0.496928	0.232333	0.437685
ATP5F1E	chr20_59028741	cg26831148	-0.00853821	-1.79729	0.793552	0.893973
ATP5F1E	chr20_59036774	cg26831148	0.000791442	-1.89078	0.987063	0.993768
HOXD8	chr2_176130955	cg00035316	0.118828	-0.765865	0.00616011	0.0376662
HOXD8	chr2_176130955	cg01293179	0.0027101	0.0794888	0.943564	0.973308
HOXD8	chr2_176130955	cg02347773	-0.0358292	-0.367425	0.139774	0.318108
HOXD8	chr2_176130955	cg03321133	0.0942266	-0.721911	6.00479e-05	0.00122067
HOXD8	chr2_176130955	cg03858756	-0.00943537	-0.61534	0.75865	0.874166
HOXD8	chr2_176130955	cg07783843	0.0287393	0.150061	0.619002	0.783446
HOXD8	chr2_176130955	cg08079908	0.0621025	-0.285612	0.429705	0.63422
HOXD8	chr2_176130955	cg09238180	-0.397575	3.34503	1.7816e-06	7.58214e-05
HOXD8	chr2_176130955	cg10239098	0.0253055	-1.02686	0.286664	0.497672
HOXD8	chr2_176130955	cg10753836	0.0530717	-0.376784	0.0253084	0.101869
HOXD8	chr2_176130955	cg11969556	0.0428382	-0.902527	0.00758353	0.0437063
HOXD8	chr2_176130955	cg14473102	-0.0331482	-0.417839	0.636039	0.795515
HOXD8	chr2_176130955	cg14601868	-0.00319699	-0.0627517	0.871689	0.935975
HOXD8	chr2_176130955	cg15520279	0.0335647	-0.835121	0.162137	0.349473
HOXD8	chr2_176130955	cg15808943	0.00783559	-1.12293	0.834297	0.916148
HOXD8	chr2_176130955	cg17863912	0.00300533	-0.436247	0.886123	0.943719
HOXD8	chr2_176130955	cg18448949	0.0571057	-0.248544	0.342146	0.553705
HOXD8	chr2_176130955	cg19373813	0.0178368	-0.239022	0.413235	0.619462
HOXD8	chr2_176130955	cg19384289	-0.0813796	-0.153449	0.33407	0.546185
HOXD8	chr2_176130955	cg19412900	0.00683446	-0.271645	0.589387	0.762227
HOXD8	chr2_176130955	cg20539752	-0.0906794	-0.380108	0.256865	0.466255
HOXD8	chr2_176130955	cg20732478	-0.203116	1.68554	4.63343e-05	0.000991959
HOXD8	chr2_176130955	cg21815667	-0.130886	0.981612	0.000853107	0.00898189
HOXD8	chr2_176130955	cg22356722	-0.0182875	-0.169295	0.321398	0.533357
HOXD8	chr2_176130955	cg23901857	-0.0354465	0.229882	0.219389	0.422517
HOXD8	chr2_176130955	cg24416513	0.0267892	-1.37886	0.513375	0.704609
HOXD8	chr2_176130955	cg25423004	-0.0483795	0.427278	0.110187	0.273737
ARID2	chr12_45893388	cg00035453	0.0403841	-0.996614	0.0042062	0.0287302
ARID2	chr12_45893388	cg00509053	0.031252	-1.5742	0.0355557	0.128967
ARID2	chr12_45893388	cg00718452	0.0209358	1.07668	0.41669	0.622428
ARID2	chr12_45893388	cg01183821	0.0197496	-0.974533	0.155124	0.339789
ARID2	chr12_45893388	cg01353809	0.00705343	-1.25201	0.632452	0.792993
ARID2	chr12_45893388	cg01751433	0.0380967	-1.26314	0.0152587	0.0717528
ARID2	chr12_45893388	cg04606887	0.0230832	-1.75375	0.601966	0.771227
ARID2	chr12_45893388	cg04909336	0.0309614	-1.20918	0.027782	0.108484
ARID2	chr12_45893388	cg04929428	0.023216	-1.01542	0.0944346	0.247001
ARID2	chr12_45893388	cg06613666	0.0447486	-1.14087	0.010941	0.0567528
ARID2	chr12_45893388	cg07276957	-0.00822681	-1.94976	0.811037	0.903436
ARID2	chr12_45893388	cg09820373	-0.0284337	-0.301587	0.257637	0.467044
ARID2	chr12_45893388	cg10617091	0.0304699	0.47648	0.191697	0.388171
ARID2	chr12_45893388	cg14654629	0.0704917	-1.32097	0.0003999	0.00510596
ARID2	chr12_45893388	cg14659678	0.123782	-0.294502	0.00514294	0.0330481
ARID2	chr12_45893388	cg15085427	0.0581021	0.612799	0.0508893	0.164218
ARID2	chr12_45893388	cg17576719	0.0314006	-1.03057	0.131245	0.30565
ARID2	chr12_45893388	cg18829183	0.130435	-3.53526	0.000495194	0.00600099
ARID2	chr12_45893388	cg19237809	0.049521	-1.29023	0.000775249	0.0083739
ARID2	chr12_45893388	cg21315021	0.0216657	-1.28344	0.106159	0.266836
ARID2	chr12_45893388	cg22526226	0.0207379	0.692494	0.408179	0.615344
ARID2	chr12_45893388	cg22732432	0.048467	-0.992036	0.00710363	0.0417864
ARID2	chr12_45893388	cg23192604	0.0443676	0.580732	0.107904	0.270042
ARID2	chr12_45893388	cg23376286	0.0304338	-1.69874	0.13745	0.314841
ARID2	chr12_45893388	cg27124109	0.0680025	-1.98299	0.00439871	0.0296319
ARID2	chr12_45893388	ch_12_917204F	0.075233	-1.24449	0.00773665	0.0442976
ARID2	chr12_45893388	ch_12_921239R	0.0419329	-1.0435	0.0562468	0.175901
ANKIB1	chr7_92371410	cg00035937	-0.0399387	0.362937	0.259453	0.468983
ANKIB1	chr7_92391139	cg00035937	-0.0226364	0.248652	0.215966	0.418539
ANKIB1	chr7_92371410	cg06075477	-0.0432323	-1.78826	0.375848	0.584922
ANKIB1	chr7_92391139	cg06075477	-0.00228904	-2.12198	0.927029	0.965278
ANKIB1	chr7_92371410	cg08139724	-0.0271242	-1.08241	0.20593	0.405505
ANKIB1	chr7_92391139	cg08139724	-0.0113688	-1.2133	0.290157	0.501161
ANKIB1	chr7_92371410	cg08771429	-0.0407515	-0.524582	0.122122	0.292789
ANKIB1	chr7_92391139	cg08771429	-0.044045	-0.387318	0.00282148	0.0213806
ANKIB1	chr7_92371410	cg10095247	0.143609	0.175264	0.00165983	0.0146005
ANKIB1	chr7_92391139	cg10095247	0.0710266	0.671114	0.00231754	0.0185181
ANKIB1	chr7_92371410	cg11036338	-0.0561038	-1.07265	0.0656931	0.195595
ANKIB1	chr7_92391139	cg11036338	-0.0328733	-1.22204	0.0311557	0.117644
ANKIB1	chr7_92371410	cg11071900	0.118424	-0.303932	0.0122364	0.0613977
ANKIB1	chr7_92391139	cg11071900	0.0223996	0.496753	0.362059	0.572231
ANKIB1	chr7_92371410	cg11813617	0.076313	-1.61265	0.072396	0.208512
ANKIB1	chr7_92391139	cg11813617	0.0276	-1.28308	0.208727	0.409319
ANKIB1	chr7_92371410	cg12034167	0.103606	-1.77211	0.000164619	0.00261257
ANKIB1	chr7_92391139	cg12034167	0.041172	-1.30646	0.00447825	0.0299974
ANKIB1	chr7_92371410	cg13205784	0.0696495	-2.11724	0.0276299	0.108054
ANKIB1	chr7_92391139	cg13205784	0.0145567	-1.66383	0.366375	0.576225
ANKIB1	chr7_92371410	cg14520511	-0.00312737	-0.841589	0.876627	0.938736
ANKIB1	chr7_92391139	cg14520511	0.00900548	-0.977751	0.38241	0.591295
ANKIB1	chr7_92371410	cg14996935	0.0599368	-1.09678	0.00376502	0.0265496
ANKIB1	chr7_92391139	cg14996935	0.0237466	-0.833536	0.0255244	0.102393
ANKIB1	chr7_92371410	cg15304674	0.248662	-2.26056	0.0135054	0.0656776
ANKIB1	chr7_92391139	cg15304674	0.0337987	-0.488372	0.454111	0.654793
ANKIB1	chr7_92371410	cg16311192	0.0268976	-0.577239	0.33461	0.546612
ANKIB1	chr7_92391139	cg16311192	0.0350004	-0.705561	0.0188927	0.0835349
ANKIB1	chr7_92371410	cg16554974	-0.0201913	-1.03131	0.369782	0.579297
ANKIB1	chr7_92391139	cg16554974	-0.00534432	-1.15965	0.645727	0.801971
ANKIB1	chr7_92371410	cg19797536	0.112385	-0.177311	0.0230571	0.0957942
ANKIB1	chr7_92391139	cg19797536	0.0219588	0.546216	0.313941	0.526083
ANKIB1	chr7_92371410	cg24672022	0.0833067	0.836917	0.0330047	0.122377
ANKIB1	chr7_92391139	cg24672022	0.0127496	1.45017	0.530073	0.716535
ANKIB1	chr7_92371410	cg25461267	0.0391503	-0.896633	0.0155282	0.0727885
ANKIB1	chr7_92391139	cg25461267	0.0336642	-0.919682	6.03612e-05	0.00122457
ANKIB1	chr7_92371410	cg27159237	0.119431	0.335203	0.00576413	0.0358303
ANKIB1	chr7_92391139	cg27159237	0.05853	0.786933	0.00718623	0.0421531
ANKIB1	chr7_92371410	cg27528649	-0.0653634	-1.16898	0.0962869	0.250391
ANKIB1	chr7_92391139	cg27528649	-0.0577042	-1.1003	0.00405538	0.0279985
EML6	chr2_54843965	cg00037388	0.00565902	-0.771169	0.383938	0.592831
EML6	chr2_54843965	cg00042059	-0.0350761	0.593292	0.00743521	0.0431107
EML6	chr2_54843965	cg00261430	-0.0216289	-1.51845	0.130604	0.3045
EML6	chr2_54843965	cg01193335	-0.0152429	0.729909	0.418381	0.623891
EML6	chr2_54843965	cg01964525	-0.0363696	1.56937	0.0160186	0.074336
EML6	chr2_54843965	cg02483058	-0.0131873	-0.0811749	0.148736	0.331086
EML6	chr2_54843965	cg04197823	-0.0659097	-0.300509	0.00339145	0.024528
EML6	chr2_54843965	cg04768463	0.00975696	1.3026	0.465808	0.664491
EML6	chr2_54843965	cg05556613	0.00946251	-1.30301	0.125604	0.297904
EML6	chr2_54843965	cg08314781	-0.0111811	0.10933	0.255269	0.464294
EML6	chr2_54843965	cg10536955	0.00596	1.33696	0.635007	0.79479
EML6	chr2_54843965	cg10855081	-0.0157004	0.0651422	0.0109898	0.0569085
EML6	chr2_54843965	cg12629349	-0.0335895	0.71163	0.0156389	0.0730562
EML6	chr2_54843965	cg13568348	-0.0174726	0.188097	0.122469	0.293249
EML6	chr2_54843965	cg14709837	0.00847153	-0.771214	0.148573	0.33079
EML6	chr2_54843965	cg14743593	-0.115254	-0.0340528	0.00181494	0.0155433
EML6	chr2_54843965	cg15543754	0.00353805	-1.43428	0.687861	0.829377
EML6	chr2_54843965	cg16098955	0.000425472	0.517721	0.958741	0.979891
EML6	chr2_54843965	cg16238795	-0.102452	-0.671162	0.00415356	0.0284757
EML6	chr2_54843965	cg16908898	0.00188817	1.13073	0.858969	0.929542
EML6	chr2_54843965	cg17272549	0.0279983	0.135007	0.0574791	0.178431
EML6	chr2_54843965	cg18279994	-0.0206375	-0.948303	0.0501986	0.162778
EML6	chr2_54843965	cg18456312	0.00271013	1.29519	0.821111	0.909064
EML6	chr2_54843965	cg18516317	-0.011897	-1.57419	0.338061	0.549771
EML6	chr2_54843965	cg19846040	-0.0383004	1.46009	0.0451378	0.151408
EML6	chr2_54843965	cg20254293	0.0293435	0.146619	0.00255382	0.0199328
EML6	chr2_54843965	cg21399807	-0.0135257	0.435966	0.431297	0.635438
EML6	chr2_54843965	cg23576807	-0.00767543	-0.496173	0.383064	0.592057
EML6	chr2_54843965	cg23636097	0.0258378	0.600888	0.0369246	0.132227
FASLG	chr1_172659642	cg00038446	0.00431448	0.440878	0.872089	0.936073
FASLG	chr1_172659642	cg00071250	0.0311091	0.0723377	0.0913562	0.242143
FASLG	chr1_172659642	cg01880648	0.0454752	0.0563877	0.177561	0.370006
FASLG	chr1_172659642	cg06983746	0.0486504	0.126471	0.00779012	0.0445272
FASLG	chr1_172659642	cg10161121	0.0534016	-0.426849	0.0677299	0.199454
PLK4	chr4_127893271	cg00038665	0.0170338	1.42267	0.361468	0.571703
PLK4	chr4_127896751	cg00038665	-0.00893691	1.70122	0.62995	0.791733
PLK4	chr4_127893271	cg00608362	0.0392828	-2.09003	0.00571858	0.0356469
PLK4	chr4_127896751	cg00608362	0.0256125	-1.97205	0.0716996	0.207026
PLK4	chr4_127893271	cg02085815	0.0330947	-2.30958	0.134426	0.310261
PLK4	chr4_127896751	cg02085815	0.0389382	-2.37687	0.0785281	0.219738
PLK4	chr4_127893271	cg02898019	0.029488	0.43594	0.00967939	0.0520652
PLK4	chr4_127896751	cg02898019	0.0226814	0.484427	0.0542582	0.171697
PLK4	chr4_127893271	cg02994288	0.0309082	-0.765511	0.000870039	0.0091112
PLK4	chr4_127896751	cg02994288	0.0487775	-1.00978	9.20489e-08	7.19796e-06
PLK4	chr4_127893271	cg06015521	-0.00187162	0.779885	0.912432	0.958317
PLK4	chr4_127896751	cg06015521	-0.00410766	0.851853	0.807492	0.901975
PLK4	chr4_127893271	cg07753711	0.0177892	-0.55247	0.118501	0.287209
PLK4	chr4_127896751	cg07753711	0.0308846	-0.733163	0.016183	0.0748525
PLK4	chr4_127893271	cg10233639	0.0306188	0.603714	0.0489192	0.160116
PLK4	chr4_127896751	cg10233639	0.0403179	0.470103	0.0108049	0.0562074
PLK4	chr4_127893271	cg10393416	0.0225081	-0.999516	0.056601	0.176518
PLK4	chr4_127896751	cg10393416	0.0395721	-1.24526	0.00082959	0.00879265
PLK4	chr4_127893271	cg11014917	0.0222165	-0.914644	0.00447908	0.0299974
PLK4	chr4_127896751	cg11014917	0.0238003	-0.976416	0.00291191	0.0219262
PLK4	chr4_127893271	cg17765713	0.00713036	-0.67907	0.587069	0.760951
PLK4	chr4_127896751	cg17765713	0.0529821	-1.22992	0.000107758	0.00191652
PLK4	chr4_127893271	cg20088535	0.0475371	-2.12811	0.00127305	0.0120136
PLK4	chr4_127896751	cg20088535	0.0360308	-2.02546	0.0145627	0.0694097
PLK4	chr4_127893271	cg21722058	0.0138983	-1.20134	0.060504	0.185011
PLK4	chr4_127896751	cg21722058	0.00614871	-1.12477	0.413801	0.619892
PLK4	chr4_127893271	cg22112850	0.00748781	1.29023	0.6741	0.821016
PLK4	chr4_127896751	cg22112850	0.0118027	1.21402	0.512887	0.704199
PLK4	chr4_127893271	cg23607253	0.0223963	-1.07152	0.00707717	0.0416675
PLK4	chr4_127896751	cg23607253	0.0272449	-1.17488	0.00133766	0.0124643
PLK4	chr4_127893271	cg23677608	0.0520326	-1.94852	3.42041e-07	2.03103e-05
PLK4	chr4_127896751	cg23677608	0.0363658	-1.82079	0.000612909	0.00708439
PLK4	chr4_127893271	cg26882168	0.023678	0.594952	0.0907488	0.241034
PLK4	chr4_127896751	cg26882168	0.000598128	0.862525	0.967563	0.984407
PDE10A	chr6_165396475	cg00039129	0.00925537	0.784182	0.825254	0.911561
PDE10A	chr6_165396475	cg00121876	-0.0694625	0.34526	1.53693e-05	0.000423475
PDE10A	chr6_165396475	cg00361017	0.045828	-0.287328	0.0178137	0.0799638
PDE10A	chr6_165396475	cg00386035	0.00872544	0.216173	0.73822	0.861654
PDE10A	chr6_165396475	cg00549973	-0.00110565	1.37791	0.97892	0.989885
PDE10A	chr6_165396475	cg00699486	-0.0276336	0.968662	0.354421	0.564709
PDE10A	chr6_165396475	cg00777627	0.0911247	-1.05575	0.00837917	0.0468648
PDE10A	chr6_165396475	cg00786178	-0.0619309	1.54892	0.0773693	0.217533
PDE10A	chr6_165396475	cg00794911	-0.00430532	-0.0795317	0.729272	0.856733
PDE10A	chr6_165396475	cg00849713	0.0299346	-0.242596	0.115396	0.282422
PDE10A	chr6_165396475	cg00910924	-0.0702673	2.02441	0.0750032	0.213347
PDE10A	chr6_165396475	cg00951302	-0.0328935	0.466447	0.221494	0.424949
PDE10A	chr6_165396475	cg01101997	-0.0181594	1.20501	0.618464	0.783082
PDE10A	chr6_165396475	cg01152056	-0.023798	-0.446202	0.345561	0.556856
PDE10A	chr6_165396475	cg01244421	0.0417296	0.893811	0.280812	0.491571
PDE10A	chr6_165396475	cg01266853	-0.00355409	1.14339	0.925975	0.964633
PDE10A	chr6_165396475	cg01269620	0.10535	-0.942232	0.00330198	0.0240743
PDE10A	chr6_165396475	cg01431114	0.0536021	-0.779003	0.0145262	0.0692764
PDE10A	chr6_165396475	cg01473249	0.053186	0.101361	0.0745859	0.212578
PDE10A	chr6_165396475	cg01486752	0.00710778	-0.730655	0.605485	0.773255
PDE10A	chr6_165396475	cg01535080	0.0536593	-0.476334	0.0239764	0.0983354
PDE10A	chr6_165396475	cg01579841	0.0422638	-0.675703	0.0718965	0.20745
PDE10A	chr6_165396475	cg01737304	0.0356233	0.453934	0.0542498	0.171697
PDE10A	chr6_165396475	cg01832737	0.0912719	-1.10949	0.00269548	0.0207179
PDE10A	chr6_165396475	cg01857838	-0.0638371	0.83831	0.0627282	0.189705
PDE10A	chr6_165396475	cg01939453	0.0882566	-0.835063	0.0372134	0.132939
PDE10A	chr6_165396475	cg02146929	0.0564774	-0.645961	0.0951839	0.248454
PDE10A	chr6_165396475	cg02149532	-0.11126	1.20615	0.000453035	0.00563116
PDE10A	chr6_165396475	cg02174765	0.0115528	-0.114654	0.651236	0.805517
PDE10A	chr6_165396475	cg02461341	-0.0469238	1.23466	0.190318	0.386436
PDE10A	chr6_165396475	cg02465374	0.000186445	-1.69483	0.998217	0.998967
PDE10A	chr6_165396475	cg02621130	0.0317158	-0.495654	0.200514	0.398897
PDE10A	chr6_165396475	cg02861775	0.00284667	1.32943	0.939591	0.971234
PDE10A	chr6_165396475	cg03643966	-0.098767	2.24331	0.071233	0.206161
PDE10A	chr6_165396475	cg03814644	0.0555412	0.307882	0.16179	0.348974
PDE10A	chr6_165396475	cg03841251	-0.100095	1.64632	0.0015467	0.0138691
PDE10A	chr6_165396475	cg04230050	0.0191259	0.0846016	0.35235	0.563003
PDE10A	chr6_165396475	cg04249522	0.0205551	0.0339204	0.639926	0.79792
PDE10A	chr6_165396475	cg04326854	0.0707788	-0.808537	0.0291611	0.112404
PDE10A	chr6_165396475	cg04387240	-0.00221299	-0.0270143	0.918278	0.961413
PDE10A	chr6_165396475	cg04434244	-0.00305861	0.428138	0.922202	0.963143
PDE10A	chr6_165396475	cg05295566	-0.0353765	0.514858	0.234718	0.440106
PDE10A	chr6_165396475	cg05310694	0.0330981	-0.191972	0.0688307	0.201349
PDE10A	chr6_165396475	cg05468948	-0.0294925	0.156074	0.144681	0.325453
PDE10A	chr6_165396475	cg05575273	-0.0313009	1.94635	0.623747	0.787146
PDE10A	chr6_165396475	cg05787951	0.0341421	0.226424	0.17874	0.371603
PDE10A	chr6_165396475	cg05842175	0.0376502	-0.171267	0.181273	0.374926
PDE10A	chr6_165396475	cg05861708	0.0413338	-0.688535	0.162576	0.349982
PDE10A	chr6_165396475	cg06128195	0.0175389	-0.638487	0.432719	0.636374
PDE10A	chr6_165396475	cg06341957	0.0335707	-0.33275	0.0102882	0.0542387
PDE10A	chr6_165396475	cg06545143	0.00373383	-0.0296945	0.829317	0.913565
PDE10A	chr6_165396475	cg06650206	-0.0486364	0.8732	0.145026	0.325898
PDE10A	chr6_165396475	cg06738040	-0.0485485	0.587184	0.177486	0.369895
PDE10A	chr6_165396475	cg07126525	-0.00679467	0.541768	0.886125	0.943719
PDE10A	chr6_165396475	cg07298859	0.0626079	1.22743	0.0688721	0.201428
PDE10A	chr6_165396475	cg07508299	-0.061109	1.64437	0.0776574	0.218176
PDE10A	chr6_165396475	cg07724407	0.0112614	1.28258	0.691824	0.832137
PDE10A	chr6_165396475	cg08249371	0.010134	0.378071	0.696454	0.835263
PDE10A	chr6_165396475	cg08267489	0.0155511	-0.346683	0.653274	0.806951
PDE10A	chr6_165396475	cg08302912	-0.0244556	1.36963	0.47845	0.676377
PDE10A	chr6_165396475	cg08321824	-0.0561558	1.72117	0.32723	0.539035
PDE10A	chr6_165396475	cg08412584	-0.014674	0.387231	0.420356	0.625661
PDE10A	chr6_165396475	cg08419582	-0.0139694	0.560344	0.366883	0.576518
PDE10A	chr6_165396475	cg08447044	-0.136426	1.81583	0.000400841	0.00511602
PDE10A	chr6_165396475	cg08564636	-0.049998	0.822331	0.191173	0.387463
PDE10A	chr6_165396475	cg08886973	0.0489758	-0.531406	0.031415	0.118303
PDE10A	chr6_165396475	cg09085041	0.0158017	0.17291	0.644199	0.801028
PDE10A	chr6_165396475	cg09149149	0.0243006	-0.936955	0.34166	0.553166
PDE10A	chr6_165396475	cg09454230	-0.0378964	1.64894	0.417765	0.623289
PDE10A	chr6_165396475	cg09456829	-0.00909565	2.00342	0.76596	0.878608
PDE10A	chr6_165396475	cg09997714	-0.0746132	0.920894	0.014868	0.0704384
PDE10A	chr6_165396475	cg10087227	-0.102845	1.16064	9.89927e-05	0.00178989
PDE10A	chr6_165396475	cg10675138	0.0682128	-0.706034	0.0254858	0.102287
PDE10A	chr6_165396475	cg10706100	0.0104089	-0.686985	0.618443	0.783082
PDE10A	chr6_165396475	cg10855945	-0.11825	1.86171	0.0204634	0.0881403
PDE10A	chr6_165396475	cg10856894	-0.0792904	1.88683	0.0587492	0.181142
PDE10A	chr6_165396475	cg11175473	-0.0842532	0.857514	0.00829945	0.0465518
PDE10A	chr6_165396475	cg11324712	0.0409479	-0.321238	0.00692148	0.0410681
PDE10A	chr6_165396475	cg11759749	-0.0179192	0.663678	0.611071	0.777429
PDE10A	chr6_165396475	cg12005824	-0.0865936	-1.24999	0.00360008	0.0256966
PDE10A	chr6_165396475	cg12167167	-0.00661248	-0.310168	0.839122	0.918685
PDE10A	chr6_165396475	cg12174276	0.00603286	-0.290554	0.62569	0.788483
PDE10A	chr6_165396475	cg12182971	-0.063887	1.33499	0.140828	0.31978
PDE10A	chr6_165396475	cg12201943	-0.0717361	2.91525	0.115979	0.283341
PDE10A	chr6_165396475	cg12254291	0.0314938	-0.79542	0.332494	0.544492
PDE10A	chr6_165396475	cg12320986	0.0645464	0.373791	0.178175	0.370844
PDE10A	chr6_165396475	cg12363472	0.0313674	0.00448396	0.069651	0.203057
PDE10A	chr6_165396475	cg12532095	-0.00337868	-0.0793569	0.805771	0.901093
PDE10A	chr6_165396475	cg13160528	-0.00369624	0.933838	0.924191	0.964076
PDE10A	chr6_165396475	cg13351249	0.0655274	0.268849	0.25411	0.463222
PDE10A	chr6_165396475	cg13384212	-0.0104306	0.916265	0.779708	0.88626
PDE10A	chr6_165396475	cg13540418	-0.0606927	1.67872	0.0625872	0.189468
PDE10A	chr6_165396475	cg14006515	-0.0558595	2.07057	0.499271	0.693334
PDE10A	chr6_165396475	cg14026561	0.00185946	-0.44684	0.965998	0.983536
PDE10A	chr6_165396475	cg14222434	-0.210452	2.27018	2.47709e-05	0.000621361
PDE10A	chr6_165396475	cg14230803	-0.0229099	-0.133563	0.179828	0.372797
PDE10A	chr6_165396475	cg14393693	-0.126168	1.27019	0.00234407	0.0186719
PDE10A	chr6_165396475	cg14759494	0.000125616	0.079609	0.995644	0.99753
PDE10A	chr6_165396475	cg14768923	0.015889	0.7802	0.7428	0.864727
PDE10A	chr6_165396475	cg15382659	-0.0090076	0.706041	0.795964	0.8956
PDE10A	chr6_165396475	cg15553391	0.0121329	-0.335524	0.187904	0.383546
PDE10A	chr6_165396475	cg15586054	-0.00920131	0.0254039	0.589361	0.762227
PDE10A	chr6_165396475	cg15951362	0.00715788	0.392124	0.743006	0.864828
PDE10A	chr6_165396475	cg15988950	-0.0166078	1.01174	0.548017	0.731013
PDE10A	chr6_165396475	cg16043046	-0.0322601	2.15461	0.555653	0.736185
PDE10A	chr6_165396475	cg16051195	0.00364951	0.263401	0.826897	0.912364
PDE10A	chr6_165396475	cg16157288	0.032287	0.203293	0.353155	0.56367
PDE10A	chr6_165396475	cg16206344	-0.0289289	0.341845	0.412399	0.618682
PDE10A	chr6_165396475	cg16289417	0.0336783	-0.544667	0.386863	0.595416
PDE10A	chr6_165396475	cg16638945	-0.00270046	1.06242	0.936398	0.970061
PDE10A	chr6_165396475	cg16799273	0.0506037	-0.888266	0.043766	0.14842
PDE10A	chr6_165396475	cg17270257	0.109533	-0.962327	0.000626988	0.00718975
PDE10A	chr6_165396475	cg17345450	-0.0209658	0.0203687	0.067337	0.198709
PDE10A	chr6_165396475	cg17537347	-0.000401567	0.352128	0.991604	0.995699
PDE10A	chr6_165396475	cg17586885	0.00523351	-0.181584	0.663744	0.81399
PDE10A	chr6_165396475	cg17712241	0.0386067	0.505108	0.105786	0.266258
PDE10A	chr6_165396475	cg17967260	0.0118517	0.153664	0.713702	0.847348
PDE10A	chr6_165396475	cg17968511	-0.00527447	0.81295	0.874726	0.937634
PDE10A	chr6_165396475	cg18132363	0.0129388	-0.440393	0.277148	0.487608
PDE10A	chr6_165396475	cg18215454	-0.0089392	0.817466	0.773511	0.882983
PDE10A	chr6_165396475	cg18403193	0.0532178	-0.522512	0.0626048	0.189504
PDE10A	chr6_165396475	cg18727102	-0.0114022	-0.520692	0.312874	0.524982
PDE10A	chr6_165396475	cg18770076	-0.0338163	2.13069	0.204676	0.404064
PDE10A	chr6_165396475	cg18902795	0.0192748	0.548589	0.612193	0.778165
PDE10A	chr6_165396475	cg19001113	-0.0415949	1.5354	0.461653	0.661103
PDE10A	chr6_165396475	cg19042390	0.00493082	-0.255245	0.648029	0.803614
PDE10A	chr6_165396475	cg19953427	-0.0309805	0.0812995	0.272541	0.48274
PDE10A	chr6_165396475	cg19997946	0.0286549	-0.356039	0.350785	0.561526
PDE10A	chr6_165396475	cg20026524	-0.0416418	1.70913	0.189168	0.384993
PDE10A	chr6_165396475	cg20026582	-0.042725	1.51478	0.113374	0.279137
PDE10A	chr6_165396475	cg20121927	-0.0332566	1.16126	0.40662	0.613716
PDE10A	chr6_165396475	cg20418529	-0.0116081	-0.0694406	0.492696	0.688221
PDE10A	chr6_165396475	cg20598720	0.0199222	1.16324	0.624959	0.787951
PDE10A	chr6_165396475	cg20673819	0.0143928	1.85334	0.645991	0.802036
PDE10A	chr6_165396475	cg21306006	0.0202556	-0.195276	0.350289	0.561117
PDE10A	chr6_165396475	cg21429087	0.09665	-1.28249	0.00482585	0.0315895
PDE10A	chr6_165396475	cg21600850	0.0190605	-0.972622	0.458311	0.658383
PDE10A	chr6_165396475	cg21607700	-0.0523563	1.51682	0.444584	0.646978
PDE10A	chr6_165396475	cg21984374	-0.0219054	0.0370684	0.302084	0.513341
PDE10A	chr6_165396475	cg22058990	0.00393614	-0.460855	0.715897	0.849074
PDE10A	chr6_165396475	cg22066180	0.018953	-0.798887	0.719447	0.851384
PDE10A	chr6_165396475	cg22141696	-0.164806	2.82423	0.013706	0.0662376
PDE10A	chr6_165396475	cg22623236	-0.0139038	1.39455	0.550029	0.732441
PDE10A	chr6_165396475	cg22809491	0.00657551	-0.466002	0.674769	0.821173
PDE10A	chr6_165396475	cg22976242	0.00479644	0.732604	0.834601	0.916295
PDE10A	chr6_165396475	cg23105605	-0.0060091	1.36379	0.837658	0.917795
PDE10A	chr6_165396475	cg23193497	-0.189967	1.65983	0.00167945	0.0147343
PDE10A	chr6_165396475	cg23321220	-0.00477811	0.0320787	0.741451	0.86376
PDE10A	chr6_165396475	cg23808916	0.00497171	0.99739	0.893055	0.947737
PDE10A	chr6_165396475	cg23864398	0.00459594	1.6962	0.928246	0.965911
PDE10A	chr6_165396475	cg23939504	-0.024661	1.22922	0.59857	0.768858
PDE10A	chr6_165396475	cg24133115	0.0824533	-0.879264	0.0174237	0.0787222
PDE10A	chr6_165396475	cg24156393	0.0111123	0.259252	0.743926	0.865161
PDE10A	chr6_165396475	cg24282460	-0.035946	1.68027	0.2235	0.427272
PDE10A	chr6_165396475	cg24480453	0.011606	-0.393815	0.34065	0.552254
PDE10A	chr6_165396475	cg24696967	-0.0772227	1.09899	0.0584049	0.180447
PDE10A	chr6_165396475	cg25115145	0.0123126	0.373095	0.498486	0.692787
PDE10A	chr6_165396475	cg25325645	-0.0334201	1.59405	0.400771	0.608753
PDE10A	chr6_165396475	cg25436486	-0.0693762	1.47218	0.325009	0.536692
PDE10A	chr6_165396475	cg25595431	-0.198666	3.03293	0.00187604	0.0159303
PDE10A	chr6_165396475	cg25641223	-0.0545458	0.896473	0.236772	0.442259
PDE10A	chr6_165396475	cg26309457	0.0272338	-0.276208	0.295293	0.506459
PDE10A	chr6_165396475	cg26577169	0.0294265	-0.72864	0.114768	0.281466
PDE10A	chr6_165396475	cg26723355	0.100803	-1.30765	0.0172612	0.0782106
PDE10A	chr6_165396475	cg27028202	0.0332887	1.04697	0.407035	0.614092
PDE10A	chr6_165396475	cg27088830	0.00766661	-0.859844	0.8174	0.906644
PDE10A	chr6_165396475	cg27101095	0.0310541	0.0471891	0.366748	0.576484
PDE10A	chr6_165396475	cg27239981	0.0186705	0.725585	0.67057	0.818993
PCDHGA5	chr5_141415642	cg00039176	-0.0452919	0.182326	0.0392986	0.137642
PCDHGA5	chr5_141415642	cg00048743	0.00223306	-0.0391701	0.952883	0.978053
PCDHGA5	chr5_141415642	cg00104845	0.0130778	0.0275443	0.647371	0.803036
PCDHGA5	chr5_141415642	cg00281842	-0.0945333	0.688221	0.103936	0.263222
PCDHGA5	chr5_141415642	cg00283283	0.00391667	0.0710708	0.838083	0.91803
PCDHGA5	chr5_141415642	cg00589850	0.0232696	0.0732649	0.184489	0.37878
PCDHGA5	chr5_141415642	cg00633552	-0.0229277	0.730331	0.231013	0.436235
PCDHGA5	chr5_141415642	cg00758915	-0.0941631	1.00784	0.00152819	0.0137623
PCDHGA5	chr5_141415642	cg00808170	0.00410675	0.291074	0.67382	0.820844
PCDHGA5	chr5_141415642	cg00888801	-0.00419544	1.06984	0.843779	0.921683
PCDHGA5	chr5_141415642	cg00943245	0.0286634	0.107422	0.160669	0.347457
PCDHGA5	chr5_141415642	cg01000954	0.000436292	2.93304	0.9909	0.995472
PCDHGA5	chr5_141415642	cg01169021	-0.0132016	0.151749	0.597487	0.767999
PCDHGA5	chr5_141415642	cg01224715	0.0362584	0.417043	0.147427	0.328945
PCDHGA5	chr5_141415642	cg01311360	0.0406844	-0.687434	0.152739	0.336577
PCDHGA5	chr5_141415642	cg01911239	0.0293639	-0.0118641	0.020226	0.0873437
PCDHGA5	chr5_141415642	cg02022733	0.0419697	-0.176005	0.0340776	0.125214
PCDHGA5	chr5_141415642	cg02022808	-0.0382557	0.308949	0.0728832	0.209463
PCDHGA5	chr5_141415642	cg02056653	0.0331682	-0.217243	0.018001	0.0805873
PCDHGA5	chr5_141415642	cg02161292	0.0151349	0.587917	0.522645	0.711265
PCDHGA5	chr5_141415642	cg02267483	0.0273732	-0.031745	0.0669063	0.197833
PCDHGA5	chr5_141415642	cg02331883	0.0232156	0.122788	0.289328	0.50042
PCDHGA5	chr5_141415642	cg02430347	-0.157518	0.680466	0.118807	0.287771
PCDHGA5	chr5_141415642	cg02452944	0.0449672	-0.216326	0.0270997	0.106682
PCDHGA5	chr5_141415642	cg02575448	0.0128275	0.255694	0.680603	0.825002
PCDHGA5	chr5_141415642	cg02580763	0.0200455	0.203955	0.0984569	0.253861
PCDHGA5	chr5_141415642	cg02707176	0.0444863	0.13851	0.168923	0.358236
PCDHGA5	chr5_141415642	cg02722596	-0.0542698	1.00102	0.151933	0.335537
PCDHGA5	chr5_141415642	cg02780295	-0.0611637	0.408296	0.0803343	0.223138
PCDHGA5	chr5_141415642	cg03086707	-0.0405753	0.776098	0.124442	0.296297
PCDHGA5	chr5_141415642	cg03415916	-0.00924011	0.954201	0.62744	0.78986
PCDHGA5	chr5_141415642	cg03486475	-0.0273704	0.604849	0.209598	0.410641
PCDHGA5	chr5_141415642	cg03640756	0.0398828	-0.453804	0.038548	0.136046
PCDHGA5	chr5_141415642	cg03828328	0.0146401	0.0696694	0.227972	0.432365
PCDHGA5	chr5_141415642	cg03835609	-0.0788515	0.73083	0.00590224	0.0364981
PCDHGA5	chr5_141415642	cg03892308	0.00993417	0.568222	0.48289	0.680151
PCDHGA5	chr5_141415642	cg03898577	-0.0448997	0.303789	0.0745268	0.212445
PCDHGA5	chr5_141415642	cg03898832	0.0288073	0.657081	0.161802	0.348977
PCDHGA5	chr5_141415642	cg04080041	0.0177599	-0.227998	0.214968	0.417211
PCDHGA5	chr5_141415642	cg04117404	-0.0199367	1.02929	0.619627	0.783907
PCDHGA5	chr5_141415642	cg04160343	-0.0419822	0.818153	0.183846	0.377903
PCDHGA5	chr5_141415642	cg04242499	0.0280789	0.11181	0.226588	0.430729
PCDHGA5	chr5_141415642	cg04246144	0.0123901	-0.578385	0.584779	0.759076
PCDHGA5	chr5_141415642	cg04453180	0.0268749	-0.308526	0.157798	0.343406
PCDHGA5	chr5_141415642	cg04503600	0.0290012	0.0157761	0.147362	0.328884
PCDHGA5	chr5_141415642	cg04637478	0.00617815	0.0212362	0.758456	0.874064
PCDHGA5	chr5_141415642	cg04726784	-0.00492544	-0.193233	0.810272	0.903109
PCDHGA5	chr5_141415642	cg04773864	-0.00923001	0.575755	0.625069	0.788024
PCDHGA5	chr5_141415642	cg04964031	0.0399742	-0.151418	0.00274408	0.0209802
PCDHGA5	chr5_141415642	cg05149776	0.0067509	0.425492	0.723442	0.853451
PCDHGA5	chr5_141415642	cg05197036	0.00244447	0.664088	0.924721	0.964262
PCDHGA5	chr5_141415642	cg05494467	0.00251556	0.218956	0.887316	0.944474
PCDHGA5	chr5_141415642	cg05670472	0.0418217	-0.341024	0.0447949	0.150698
PCDHGA5	chr5_141415642	cg05870739	0.0348667	-0.278822	0.0700494	0.203887
PCDHGA5	chr5_141415642	cg06065872	-0.0596888	2.12173	0.0627738	0.189809
PCDHGA5	chr5_141415642	cg06428620	0.0314755	0.0131598	0.209972	0.411035
PCDHGA5	chr5_141415642	cg06572465	0.0176499	-0.0996582	0.315763	0.528
PCDHGA5	chr5_141415642	cg06575035	0.0246604	0.129627	0.111067	0.275103
PCDHGA5	chr5_141415642	cg06757585	-0.00267592	0.450071	0.890992	0.946652
PCDHGA5	chr5_141415642	cg06776159	0.00241208	1.1771	0.919255	0.962082
PCDHGA5	chr5_141415642	cg07017875	0.0136508	-0.044547	0.186549	0.381879
PCDHGA5	chr5_141415642	cg07179872	-0.00643584	0.305489	0.777585	0.885126
PCDHGA5	chr5_141415642	cg07231479	0.0202167	0.0845905	0.0724704	0.208688
PCDHGA5	chr5_141415642	cg07242860	0.0178545	-0.579874	0.230085	0.435093
PCDHGA5	chr5_141415642	cg07445963	0.0322075	-0.346012	0.0189323	0.0836434
PCDHGA5	chr5_141415642	cg07448606	-0.0437324	-0.088108	0.323466	0.535389
PCDHGA5	chr5_141415642	cg07489502	0.054282	-0.113277	0.0808925	0.224203
PCDHGA5	chr5_141415642	cg07520649	-0.00827836	0.639313	0.753965	0.871436
PCDHGA5	chr5_141415642	cg07524997	0.016276	0.175598	0.664787	0.814612
PCDHGA5	chr5_141415642	cg07539798	0.0228855	0.212156	0.198688	0.396743
PCDHGA5	chr5_141415642	cg07608474	-0.0254912	1.52354	0.49497	0.689835
PCDHGA5	chr5_141415642	cg07613945	-0.0453579	0.821131	0.193331	0.390271
PCDHGA5	chr5_141415642	cg07620533	0.0322604	-0.182018	0.0438022	0.14849
PCDHGA5	chr5_141415642	cg07717903	0.0136703	0.49193	0.427903	0.632613
PCDHGA5	chr5_141415642	cg07730329	0.0368475	0.0806715	0.0502965	0.162952
PCDHGA5	chr5_141415642	cg07802710	0.0376309	-0.353355	0.0129962	0.0639447
PCDHGA5	chr5_141415642	cg07804076	0.0172532	-0.0356369	0.189137	0.384976
PCDHGA5	chr5_141415642	cg07870307	-0.0673668	0.447916	0.0995809	0.255822
PCDHGA5	chr5_141415642	cg08155325	0.0419126	0.158732	0.102888	0.261575
PCDHGA5	chr5_141415642	cg08292467	-0.00400501	0.290685	0.795752	0.895538
PCDHGA5	chr5_141415642	cg08395122	0.0222343	-0.0378291	0.0500931	0.16252
PCDHGA5	chr5_141415642	cg08616061	0.0265013	-0.0104444	0.0609546	0.186047
PCDHGA5	chr5_141415642	cg08935238	0.0165724	0.0284594	0.29823	0.508972
PCDHGA5	chr5_141415642	cg09066326	-0.0626793	0.791416	0.0270872	0.106658
PCDHGA5	chr5_141415642	cg09484752	-0.0123684	1.06202	0.563081	0.742277
PCDHGA5	chr5_141415642	cg09570348	-0.0483716	1.13363	0.217705	0.420799
PCDHGA5	chr5_141415642	cg09581226	0.0212573	0.292788	0.153707	0.337935
PCDHGA5	chr5_141415642	cg09639151	0.023548	0.0435101	0.10225	0.26035
PCDHGA5	chr5_141415642	cg10475970	0.00238692	0.0733612	0.847554	0.923191
PCDHGA5	chr5_141415642	cg10679597	0.0348276	-0.0789257	0.0622714	0.188976
PCDHGA5	chr5_141415642	cg10858746	-0.112125	1.05733	0.0313518	0.118157
PCDHGA5	chr5_141415642	cg10917547	0.0253946	-0.38579	0.326086	0.537911
PCDHGA5	chr5_141415642	cg11014124	0.0535006	-0.175281	0.106548	0.267511
PCDHGA5	chr5_141415642	cg11086421	0.00809181	0.030979	0.62974	0.79159
PCDHGA5	chr5_141415642	cg11210069	-0.0489401	0.658135	0.0682825	0.200319
PCDHGA5	chr5_141415642	cg11499025	0.0451613	-0.643711	0.00669617	0.0400256
PCDHGA5	chr5_141415642	cg11647681	0.0376432	-0.120974	0.0245844	0.099958
PCDHGA5	chr5_141415642	cg11655243	0.0158537	0.504102	0.481989	0.679418
PCDHGA5	chr5_141415642	cg11830096	0.0126934	1.76284	0.726884	0.855314
PCDHGA5	chr5_141415642	cg11907797	-0.00646776	0.320891	0.691251	0.831706
PCDHGA5	chr5_141415642	cg12145907	0.0318284	-0.22659	0.0829525	0.227546
PCDHGA5	chr5_141415642	cg12304520	0.038175	0.196652	0.164757	0.352815
PCDHGA5	chr5_141415642	cg12459904	-0.000363254	0.219436	0.986235	0.993209
PCDHGA5	chr5_141415642	cg12487901	0.0216902	-0.163074	0.0764579	0.216033
PCDHGA5	chr5_141415642	cg12648074	0.0217946	0.0515201	0.11677	0.284616
PCDHGA5	chr5_141415642	cg12877039	0.0306548	0.0319193	0.0933067	0.245013
PCDHGA5	chr5_141415642	cg13023584	0.0134332	0.797472	0.672932	0.820284
PCDHGA5	chr5_141415642	cg13307880	0.0393975	-0.121938	0.00716591	0.0420562
PCDHGA5	chr5_141415642	cg13598256	0.0148629	-0.0939707	0.5086	0.700769
PCDHGA5	chr5_141415642	cg13718539	0.027925	-0.0678197	0.0802963	0.223088
PCDHGA5	chr5_141415642	cg13933262	0.0149705	-0.0434851	0.681647	0.825698
PCDHGA5	chr5_141415642	cg13972793	0.0177546	0.00928732	0.0549352	0.173264
PCDHGA5	chr5_141415642	cg13993336	-0.0858003	0.512482	0.0381824	0.135153
PCDHGA5	chr5_141415642	cg14253517	0.0349921	-0.241285	0.0158547	0.0737436
PCDHGA5	chr5_141415642	cg14458068	0.00441265	0.137858	0.823087	0.910163
PCDHGA5	chr5_141415642	cg14472390	0.00347037	0.737598	0.832201	0.915052
PCDHGA5	chr5_141415642	cg14566959	0.0268881	0.387004	0.205632	0.405183
PCDHGA5	chr5_141415642	cg14672084	0.00534842	1.21266	0.918013	0.961339
PCDHGA5	chr5_141415642	cg14681511	-0.0197545	0.441928	0.446837	0.648613
PCDHGA5	chr5_141415642	cg14738170	0.00286892	-0.152177	0.854748	0.927592
PCDHGA5	chr5_141415642	cg15004405	0.00557226	0.395302	0.589084	0.762227
PCDHGA5	chr5_141415642	cg15124968	-0.0363379	0.199511	0.213139	0.414992
PCDHGA5	chr5_141415642	cg15361590	0.0347718	-0.240174	0.0493071	0.160817
PCDHGA5	chr5_141415642	cg15672768	0.0273224	-0.0204066	0.0511878	0.164814
PCDHGA5	chr5_141415642	cg15829642	0.0164628	0.857516	0.608883	0.775852
PCDHGA5	chr5_141415642	cg15874877	0.0254322	0.334596	0.290171	0.501161
PCDHGA5	chr5_141415642	cg15949044	0.0339749	-0.221176	0.0828496	0.227376
PCDHGA5	chr5_141415642	cg15988320	0.0165256	-0.470788	0.329405	0.541348
PCDHGA5	chr5_141415642	cg16032518	0.0401388	-0.106905	0.0625353	0.189415
PCDHGA5	chr5_141415642	cg16316394	-0.0414627	1.0522	0.124462	0.296297
PCDHGA5	chr5_141415642	cg16505764	0.00551889	0.263096	0.785341	0.889567
PCDHGA5	chr5_141415642	cg17108383	0.0234573	0.575432	0.404885	0.612234
PCDHGA5	chr5_141415642	cg17227466	-0.025706	0.245928	0.430661	0.635067
PCDHGA5	chr5_141415642	cg17297238	0.0228783	0.185001	0.265451	0.475338
PCDHGA5	chr5_141415642	cg17451176	-0.000661526	-0.089873	0.968084	0.984667
PCDHGA5	chr5_141415642	cg17857974	0.0368944	-0.0779254	0.100496	0.25722
PCDHGA5	chr5_141415642	cg17982031	-0.0189475	0.231541	0.325848	0.537598
PCDHGA5	chr5_141415642	cg18054674	0.0037853	0.625512	0.848819	0.923959
PCDHGA5	chr5_141415642	cg18118262	0.0279917	0.0807094	0.296087	0.507108
PCDHGA5	chr5_141415642	cg18164784	0.023962	-0.00196316	0.347949	0.559029
PCDHGA5	chr5_141415642	cg18507379	-0.0529851	0.662413	0.0996835	0.256026
PCDHGA5	chr5_141415642	cg18617005	-0.0552667	0.712795	0.0669339	0.197879
PCDHGA5	chr5_141415642	cg18858331	0.0297869	-0.0562552	0.0223353	0.0936715
PCDHGA5	chr5_141415642	cg18869485	0.0508112	0.111779	0.123678	0.295015
PCDHGA5	chr5_141415642	cg19247475	0.0215694	0.194059	0.154981	0.339699
PCDHGA5	chr5_141415642	cg19748485	0.0169906	0.0825121	0.107913	0.270042
PCDHGA5	chr5_141415642	cg19754283	-0.0160539	0.369809	0.643937	0.800882
PCDHGA5	chr5_141415642	cg20938085	-0.00758137	0.520677	0.671725	0.819542
PCDHGA5	chr5_141415642	cg21101631	0.0290979	-0.188264	0.0983295	0.253644
PCDHGA5	chr5_141415642	cg21117330	0.0309051	0.111375	0.128158	0.301472
PCDHGA5	chr5_141415642	cg21157357	0.00407149	0.77174	0.813357	0.904417
PCDHGA5	chr5_141415642	cg21185686	0.014996	0.107157	0.346156	0.55741
PCDHGA5	chr5_141415642	cg21580428	0.00982829	-0.17967	0.619865	0.784147
PCDHGA5	chr5_141415642	cg21627409	0.0392786	-0.225197	0.0222988	0.0935537
PCDHGA5	chr5_141415642	cg21752383	0.0502489	0.0478926	0.0201391	0.0870692
PCDHGA5	chr5_141415642	cg21908557	-0.0261589	0.260568	0.159345	0.345443
PCDHGA5	chr5_141415642	cg22052948	0.0299162	0.138102	0.134475	0.310299
PCDHGA5	chr5_141415642	cg22082176	0.0213733	-0.127985	0.148343	0.330432
PCDHGA5	chr5_141415642	cg22151446	0.0389307	-0.310801	0.0388043	0.136543
PCDHGA5	chr5_141415642	cg22175873	0.0203082	0.0732225	0.212177	0.413656
PCDHGA5	chr5_141415642	cg22463553	0.00884694	0.182603	0.68442	0.827414
PCDHGA5	chr5_141415642	cg22648135	0.0265979	-0.100172	0.232649	0.438075
PCDHGA5	chr5_141415642	cg22692868	-0.00357113	0.869097	0.912046	0.958184
PCDHGA5	chr5_141415642	cg22737624	-0.0104018	0.207618	0.61419	0.779684
PCDHGA5	chr5_141415642	cg22847228	0.0260203	-0.547314	0.323453	0.535389
PCDHGA5	chr5_141415642	cg22861116	-0.010269	0.418821	0.7194	0.851384
PCDHGA5	chr5_141415642	cg23082339	0.0443367	-0.769413	0.0497315	0.161863
PCDHGA5	chr5_141415642	cg23244790	0.0263981	-0.132598	0.153107	0.33712
PCDHGA5	chr5_141415642	cg23347399	-0.0181846	0.609033	0.509977	0.70184
PCDHGA5	chr5_141415642	cg23348764	0.0137377	-0.106488	0.501602	0.695094
PCDHGA5	chr5_141415642	cg23359276	-0.096381	0.487609	0.0331899	0.122901
PCDHGA5	chr5_141415642	cg23445461	0.0431764	-0.313012	0.0805519	0.223463
PCDHGA5	chr5_141415642	cg24024424	0.0251975	-0.122647	0.11556	0.282618
PCDHGA5	chr5_141415642	cg24155123	0.0251492	-0.170607	0.0883354	0.236737
PCDHGA5	chr5_141415642	cg24172509	-2.8617e-05	0.839285	0.999402	0.999522
PCDHGA5	chr5_141415642	cg24619378	0.0250488	0.157162	0.196586	0.394276
PCDHGA5	chr5_141415642	cg24633027	0.0580642	0.568432	0.0120952	0.0609185
PCDHGA5	chr5_141415642	cg24656271	0.00780507	0.192078	0.638948	0.797506
PCDHGA5	chr5_141415642	cg24921961	0.00628615	0.716052	0.68513	0.827912
PCDHGA5	chr5_141415642	cg24942747	0.0154848	0.109448	0.179779	0.372797
PCDHGA5	chr5_141415642	cg24954895	0.0115313	0.0745886	0.392016	0.600544
PCDHGA5	chr5_141415642	cg25353450	0.0686326	-0.906039	0.0368028	0.131925
PCDHGA5	chr5_141415642	cg25426815	-0.0578418	0.478245	0.0997085	0.256037
PCDHGA5	chr5_141415642	cg25564433	-0.0308189	0.928547	0.208514	0.409022
PCDHGA5	chr5_141415642	cg25600472	-0.00697106	0.649113	0.656443	0.808897
PCDHGA5	chr5_141415642	cg25949304	-0.0253951	0.298545	0.395062	0.603723
PCDHGA5	chr5_141415642	cg26114452	-0.083096	0.988112	0.0684174	0.200574
PCDHGA5	chr5_141415642	cg26275431	0.00947087	0.110523	0.594985	0.766085
PCDHGA5	chr5_141415642	cg26337998	0.0233373	-0.328657	0.347426	0.558591
PCDHGA5	chr5_141415642	cg26647197	0.0256712	0.160852	0.247004	0.454748
PCDHGA5	chr5_141415642	cg26811372	-0.0231206	0.649433	0.383953	0.592831
PCDHGA5	chr5_141415642	cg26826004	0.0373075	-0.670294	0.0327914	0.121852
PCDHGA5	chr5_141415642	cg26843711	-0.0525097	0.679812	0.0273624	0.107325
PCDHGA5	chr5_141415642	cg26856475	0.0189328	0.279553	0.357035	0.567145
PCDHGA5	chr5_141415642	cg26879386	0.0235503	0.572724	0.123217	0.294258
PCDHGA5	chr5_141415642	cg26890354	0.0395256	-0.559003	0.0661975	0.196574
PCDHGA5	chr5_141415642	cg26962778	-0.0203969	0.258454	0.0739106	0.211331
PCDHGA5	chr5_141415642	cg27305357	0.0103413	-0.00856211	0.303628	0.515273
PCDHGA5	chr5_141415642	cg27553119	0.0205077	-0.0909547	0.057036	0.177419
PCDHGA5	chr5_141415642	cg27639030	0.0392995	-0.437238	0.026869	0.106077
PCDHGA5	chr5_141415642	cg27665767	-0.000221854	0.304516	0.985737	0.993056
CREBBP	chr16_3758052	cg00039463	0.00724823	-0.0846844	0.35924	0.569431
CREBBP	chr16_3758052	cg00747661	0.0272377	-1.0621	0.000136036	0.00228041
CREBBP	chr16_3758052	cg01010931	-0.0223555	1.41734	0.0852953	0.231456
CREBBP	chr16_3758052	cg01312837	0.0273865	0.032755	0.000351287	0.00463915
[truncated: 31,313 more rows]

## Sheet: STAD
gene	str_id	cg	coef	intercept	p_value	adj_p
FAM81A	chr15_59401771	cg00000905	0.00155508	-0.625046	0.760849	0.865769
FAM81A	chr15_59401771	cg02454802	0.0163171	0.325789	0.225087	0.45017
FAM81A	chr15_59401771	cg02473288	0.00569571	-1.37331	0.359786	0.581482
FAM81A	chr15_59401771	cg03846129	0.00780766	-1.72711	0.49948	0.703296
FAM81A	chr15_59401771	cg04099524	0.0108504	-0.849446	0.0504192	0.17892
FAM81A	chr15_59401771	cg05061769	0.0114086	0.243418	0.236899	0.462695
FAM81A	chr15_59401771	cg05178734	-0.021763	-0.0308441	0.000196641	0.00301038
FAM81A	chr15_59401771	cg05841929	0.0134731	-0.184604	0.0609938	0.202644
FAM81A	chr15_59401771	cg06273763	-0.000789626	-0.363568	0.919389	0.958111
FAM81A	chr15_59401771	cg07488684	-0.00989631	-0.659746	0.252978	0.479555
FAM81A	chr15_59401771	cg07684353	0.00915084	-0.701812	0.0410749	0.156372
FAM81A	chr15_59401771	cg08454546	0.0229366	0.52463	0.22345	0.448932
FAM81A	chr15_59401771	cg08513681	0.00490591	-0.629614	0.232088	0.457718
FAM81A	chr15_59401771	cg12497187	-0.00494488	1.1305	0.641449	0.795912
FAM81A	chr15_59401771	cg12556586	0.0264566	0.47168	0.00224788	0.0195424
FAM81A	chr15_59401771	cg13331940	-0.0358392	-1.61758	0.00616739	0.0410578
FAM81A	chr15_59401771	cg16379311	-0.0021186	-0.521373	0.591097	0.767322
FAM81A	chr15_59401771	cg18262212	-0.0130022	-1.48177	0.130665	0.32433
FAM81A	chr15_59401771	cg18858542	0.00595183	-0.811484	0.254948	0.481125
FAM81A	chr15_59401771	cg22068529	-0.00244784	-1.28488	0.641944	0.795912
FAM81A	chr15_59401771	cg22550075	0.00877661	-0.67935	0.0424237	0.158722
FAM81A	chr15_59401771	cg22687244	0.00470716	0.380572	0.729756	0.849279
FAM81A	chr15_59401771	cg25273520	-0.0261119	1.22267	0.0139771	0.07421
FAM81A	chr15_59401771	cg25489866	-0.104361	0.695474	2.11031e-05	0.000519028
FAM81A	chr15_59401771	cg25980168	0.0292708	0.441256	0.0239951	0.108995
FAM81A	chr15_59401771	cg26189873	0.0109415	-0.857113	0.0362383	0.145258
FAM81A	chr15_59401771	cg26238644	0.00171474	-0.683874	0.714011	0.840212
FAM81A	chr15_59401771	cg26315263	0.013548	-0.866106	0.0192589	0.0938522
FAM81A	chr15_59401771	cg27299024	-0.00165912	1.18063	0.884612	0.938878
TNFRSF11A	chr18_62358226	cg00001930	0.0142696	0.843637	0.297045	0.520852
TNFRSF11A	chr18_62358226	cg01765461	0.0139702	-0.864699	0.0108277	0.0617182
TNFRSF11A	chr18_62358226	cg11697226	0.00465499	-1.52954	0.661327	0.81051
TNFRSF11A	chr18_62358226	cg11966450	0.0373353	-1.35651	0.00289811	0.0238153
TNFRSF11A	chr18_62358226	cg14532069	0.00122204	-0.81511	0.882674	0.937105
TNFRSF11A	chr18_62358226	cg15315773	0.0304298	-0.595118	1.73239e-06	7.13471e-05
TNFRSF11A	chr18_62358226	cg15363349	0.00615654	-1.40885	0.276335	0.501112
TNFRSF11A	chr18_62358226	cg15961044	0.0153152	-0.667634	0.000859202	0.00939931
TNFRSF11A	chr18_62358226	cg16174779	0.0275082	-0.736553	0.158198	0.36385
TNFRSF11A	chr18_62358226	cg16954577	-0.00753205	0.558652	0.315031	0.538486
TNFRSF11A	chr18_62358226	cg17279410	0.0385766	-0.169438	0.00972647	0.0571521
TNFRSF11A	chr18_62358226	cg17804850	-0.00955484	0.683177	0.347727	0.569441
TNFRSF11A	chr18_62358226	cg19524723	-0.026777	0.877972	0.0010632	0.0110991
TNFRSF11A	chr18_62358226	cg20274965	0.0116362	0.165776	0.383772	0.603786
TNFRSF11A	chr18_62358226	cg22205276	-0.0578346	1.71018	0.00132648	0.0130559
TNFRSF11A	chr18_62358226	cg24258439	0.0257058	1.33663	0.0337981	0.138489
TNFRSF11A	chr18_62358226	cg24422198	0.0116061	-0.755977	0.0139131	0.0739827
TNFRSF11A	chr18_62358226	cg25740602	-0.0139933	0.794216	0.143342	0.343773
RTTN	chr18_70142397	cg00002236	0.0165899	-1.21013	0.144269	0.344609
RTTN	chr18_70142397	cg03647455	0.0048921	-1.15251	0.581506	0.760615
RTTN	chr18_70142397	cg06118578	0.0141991	-0.674008	0.392145	0.611206
RTTN	chr18_70142397	cg06282189	-0.00399744	0.741024	0.806672	0.895999
RTTN	chr18_70142397	cg10892794	-0.0233462	1.31781	0.335152	0.558463
RTTN	chr18_70142397	cg12293415	0.00959268	-0.91029	0.558988	0.745288
RTTN	chr18_70142397	cg12375025	0.0256773	-2.09441	0.605144	0.772201
RTTN	chr18_70142397	cg13359134	0.0120308	-1.8433	0.529326	0.723354
RTTN	chr18_70142397	cg15656901	0.00483027	-1.17995	0.609539	0.775441
RTTN	chr18_70142397	cg17023972	-0.000431377	-1.02235	0.973187	0.987765
RTTN	chr18_70142397	cg18824571	0.00600072	-1.35493	0.493473	0.698444
RTTN	chr18_70142397	cg19723154	0.0466196	-0.370983	0.131383	0.325804
RTTN	chr18_70142397	cg20423427	0.00216004	-2.03755	0.93491	0.966095
RTTN	chr18_70142397	cg22223655	0.0786533	-0.956125	0.0720315	0.226433
RTTN	chr18_70142397	cg24218995	0.0261832	-1.81738	0.223999	0.44954
RTTN	chr18_70142397	cg27359501	-0.0291139	-0.893745	0.0583478	0.196589
ERLIN2	chr8_37753897	cg00007675	0.0440834	0.163567	0.152569	0.356105
ERLIN2	chr8_37753897	cg00450319	-0.0784391	1.22367	0.00334598	0.0265404
ERLIN2	chr8_37753897	cg01150297	0.0118178	-0.76316	0.206535	0.42647
ERLIN2	chr8_37753897	cg01467789	0.0237723	-0.94056	0.253638	0.479997
ERLIN2	chr8_37753897	cg01981230	-0.0406085	-1.23891	0.126599	0.31853
ERLIN2	chr8_37753897	cg02650323	-0.0139862	1.48942	0.613162	0.778179
ERLIN2	chr8_37753897	cg04793634	0.0943257	-0.270125	9.76064e-05	0.00174627
ERLIN2	chr8_37753897	cg05020125	-0.0501154	0.561582	0.00700245	0.0451718
ERLIN2	chr8_37753897	cg06415302	0.123461	-1.14812	0.0164629	0.0838883
ERLIN2	chr8_37753897	cg06994936	-0.0051562	1.19223	0.782143	0.879639
ERLIN2	chr8_37753897	cg08247852	-0.0656697	1.04473	0.0126006	0.0690668
ERLIN2	chr8_37753897	cg09056309	0.0420929	-2.76857	0.0692616	0.220687
ERLIN2	chr8_37753897	cg09188212	-0.145112	2.35509	1.22911e-06	5.2902e-05
ERLIN2	chr8_37753897	cg09478597	0.0259849	-1.38746	0.101756	0.280926
ERLIN2	chr8_37753897	cg09896598	0.116337	-3.89814	0.00667442	0.0435765
ERLIN2	chr8_37753897	cg10063512	0.00308283	-0.709614	0.835417	0.911727
ERLIN2	chr8_37753897	cg12180121	0.0689334	-3.4124	0.0272777	0.119512
ERLIN2	chr8_37753897	cg13077699	-0.01917	-1.05265	0.445234	0.657947
ERLIN2	chr8_37753897	cg13346869	-0.0747389	0.902715	0.00505802	0.0357047
ERLIN2	chr8_37753897	cg13612524	0.0522145	-2.04604	0.0078542	0.0490451
ERLIN2	chr8_37753897	cg14036776	0.0499879	-1.22482	0.0611582	0.202997
ERLIN2	chr8_37753897	cg16978367	-0.00628101	-0.437602	0.618004	0.78055
ERLIN2	chr8_37753897	cg17465233	0.0155161	-1.30654	0.345942	0.568024
ERLIN2	chr8_37753897	cg18191664	0.0630175	-2.96444	0.0133304	0.0718294
ERLIN2	chr8_37753897	cg21505509	-0.10728	1.68005	0.00106565	0.0111137
ERLIN2	chr8_37753897	cg24260847	0.00916355	-0.709035	0.509525	0.710062
ERLIN2	chr8_37753897	cg26393977	0.0136931	0.659185	0.552804	0.741734
ERLIN2	chr8_37753897	cg26432044	0.083693	-2.9512	0.00297441	0.0243485
CACHD1	chr1_64673105	cg00013899	-0.00903116	1.63729	0.468739	0.679649
CACHD1	chr1_64673105	cg00825690	0.0211549	0.243788	0.177373	0.388644
CACHD1	chr1_64673105	cg01393233	-0.05579	0.189947	1.69331e-06	7.0289e-05
CACHD1	chr1_64673105	cg01521258	-0.0156474	-0.0603193	0.0377072	0.148747
CACHD1	chr1_64673105	cg02284587	0.0311024	-1.31808	0.01474	0.0774773
CACHD1	chr1_64673105	cg03062196	0.0362689	0.307721	0.000553209	0.00665498
CACHD1	chr1_64673105	cg03068051	0.0136523	-0.378836	0.0171935	0.0864107
CACHD1	chr1_64673105	cg03202416	-0.0219392	-0.671353	0.0328692	0.136009
CACHD1	chr1_64673105	cg03330820	0.0451009	0.254763	0.00233905	0.020168
CACHD1	chr1_64673105	cg04400131	0.0089608	0.604883	0.606118	0.773256
CACHD1	chr1_64673105	cg05120074	0.0679102	0.320546	0.000210206	0.00317182
CACHD1	chr1_64673105	cg09070316	0.0424761	-0.170865	6.83736e-06	0.000213074
CACHD1	chr1_64673105	cg10381153	0.0101785	0.496342	0.546781	0.736826
CACHD1	chr1_64673105	cg11746396	0.0145591	0.351727	0.286857	0.51026
CACHD1	chr1_64673105	cg11750112	-0.0231582	1.35793	0.176574	0.38762
CACHD1	chr1_64673105	cg11795488	0.0387307	-0.308171	1.18911e-05	0.000327044
CACHD1	chr1_64673105	cg12049550	-0.0132275	0.671147	0.346866	0.568652
CACHD1	chr1_64673105	cg12299795	0.0182697	0.550925	0.281248	0.50421
CACHD1	chr1_64673105	cg12730853	-0.000353613	-0.335482	0.980203	0.990388
CACHD1	chr1_64673105	cg12809259	-0.102113	0.302527	7.54628e-07	3.53799e-05
CACHD1	chr1_64673105	cg13679776	0.0225482	-0.821026	0.0456453	0.166969
CACHD1	chr1_64673105	cg15132650	-0.0162261	-0.962617	0.166855	0.376032
CACHD1	chr1_64673105	cg15138712	0.0331502	0.810976	0.00230872	0.0199721
CACHD1	chr1_64673105	cg15255399	-0.0133697	-0.466123	0.058008	0.19596
CACHD1	chr1_64673105	cg16487794	-0.0353352	-0.436198	0.00115104	0.0117602
CACHD1	chr1_64673105	cg17181043	0.0691807	-0.590544	2.34734e-05	0.000564112
CACHD1	chr1_64673105	cg19304410	0.0491678	-1.31717	4.05045e-05	0.000877068
CACHD1	chr1_64673105	cg19745637	-0.159501	0.905179	7.92615e-06	0.000239197
CACHD1	chr1_64673105	cg20876010	0.0393069	-0.779073	1.19865e-09	1.87884e-07
CACHD1	chr1_64673105	cg21679730	0.0466612	-0.531744	1.25824e-05	0.000342333
CACHD1	chr1_64673105	cg21912203	0.00395397	0.799337	0.846543	0.917955
CACHD1	chr1_64673105	cg23260625	0.020829	0.509245	0.188104	0.403157
CACHD1	chr1_64673105	cg23617193	0.0425496	-0.845442	1.52219e-09	2.22029e-07
CACHD1	chr1_64673105	cg24306340	-0.0450896	0.522948	3.63943e-06	0.000126981
CACHD1	chr1_64673105	cg24639703	0.0799945	-0.978955	0.0660434	0.213149
CACHD1	chr1_64673105	cg24735226	0.117679	-1.10305	1.26539e-10	3.59389e-08
CACHD1	chr1_64673105	cg25021456	0.0319584	0.616993	0.0198117	0.0956199
CACHD1	chr1_64673105	cg25210796	0.0365986	-0.449489	0.000242593	0.00354729
CACHD1	chr1_64673105	cg26224018	-0.0388521	0.551024	0.00289124	0.0238147
CACHD1	chr1_64673105	cg26262482	-0.0786499	0.643236	1.69663e-09	2.37574e-07
PCNX4	chr14_60150197	cg00017033	-0.0129456	-1.43923	0.0770376	0.236012
PCNX4	chr14_60150197	cg00708844	-2.47663e-05	-0.846382	0.996993	0.99899
PCNX4	chr14_60150197	cg00846580	0.0164203	-0.91907	0.00294551	0.0241481
PCNX4	chr14_60150197	cg01023344	-0.00806034	-0.706347	0.192864	0.409515
PCNX4	chr14_60150197	cg01074676	0.00816478	0.855923	0.524193	0.720511
PCNX4	chr14_60150197	cg02850003	-0.00393824	-2.30909	0.818454	0.902405
PCNX4	chr14_60150197	cg03037218	0.00931908	-1.19742	0.152794	0.356379
PCNX4	chr14_60150197	cg06746112	-0.00561755	-0.73714	0.521403	0.719259
PCNX4	chr14_60150197	cg06898279	0.00321195	0.550966	0.785059	0.881879
PCNX4	chr14_60150197	cg07075568	0.00497177	1.34527	0.710237	0.837045
PCNX4	chr14_60150197	cg08634539	0.00821485	-0.804693	0.170626	0.381142
PCNX4	chr14_60150197	cg09314642	-0.0286031	-1.13971	1.7822e-05	0.000448842
PCNX4	chr14_60150197	cg09694403	-0.000828595	-1.54678	0.956184	0.977689
PCNX4	chr14_60150197	cg12407844	0.00231098	-0.665712	0.776853	0.875447
PCNX4	chr14_60150197	cg13277940	-0.000447305	-0.938154	0.957055	0.978103
PCNX4	chr14_60150197	cg13624631	0.000256524	-0.30185	0.98278	0.991656
PCNX4	chr14_60150197	cg14094449	-0.0177015	-0.939606	0.0375831	0.148662
PCNX4	chr14_60150197	cg14987564	0.00460034	-0.649842	0.46036	0.672974
PCNX4	chr14_60150197	cg15852532	0.00574814	-1.22651	0.459088	0.672058
PCNX4	chr14_60150197	cg15876689	0.0163752	-1.09515	0.138122	0.337104
PCNX4	chr14_60150197	cg18208853	-0.00252636	-0.729584	0.686602	0.823515
PCNX4	chr14_60150197	cg18906360	0.0212741	-0.175034	0.0502555	0.178742
PCNX4	chr14_60150197	cg23283614	0.0171167	-0.563929	0.129412	0.322822
PCNX4	chr14_60150197	cg23564559	-0.0198696	-1.32399	0.197841	0.415712
PCNX4	chr14_60150197	cg23574243	0.040573	0.00641148	0.00308387	0.0250519
PCNX4	chr14_60150197	cg24093178	0.00471259	-0.877762	0.558816	0.745229
PCNX4	chr14_60150197	cg24461412	-0.00712018	-0.518653	0.389935	0.609299
PCNX4	chr14_60150197	cg25563087	-0.00305477	-1.39148	0.686024	0.823394
PCNX4	chr14_60150197	cg26172862	0.0154742	-2.01952	0.26998	0.494959
SRBD1	chr2_45579825	cg00017059	-0.0449868	2.38334	0.301957	0.526028
SRBD1	chr2_45579825	cg01013336	0.100147	-0.822615	0.000105767	0.0018637
SRBD1	chr2_45579825	cg02630207	0.0480807	-0.6076	0.16802	0.377846
SRBD1	chr2_45579825	cg05415767	0.0576523	-0.0863556	0.160024	0.365885
SRBD1	chr2_45579825	cg08948149	-0.00923127	1.47419	0.632515	0.791205
SRBD1	chr2_45579825	cg09273012	0.0306131	0.310483	0.0839161	0.248985
SRBD1	chr2_45579825	cg11025750	-0.019267	1.88738	0.411494	0.627329
SRBD1	chr2_45579825	cg12087108	0.000426105	-1.62064	0.977882	0.98956
SRBD1	chr2_45579825	cg12939390	0.0184924	0.352546	0.506776	0.707922
SRBD1	chr2_45579825	cg14832358	0.00838572	-1.16849	0.509672	0.71009
SRBD1	chr2_45579825	cg15053029	0.0354611	0.240558	0.0953584	0.270883
SRBD1	chr2_45579825	cg15146906	-0.000619579	-0.918634	0.96107	0.980585
SRBD1	chr2_45579825	cg15156059	0.061355	-1.01558	0.0113458	0.0638651
SRBD1	chr2_45579825	cg15679981	0.0303002	0.435394	0.214878	0.437565
SRBD1	chr2_45579825	cg16402715	0.0069536	0.895587	0.79175	0.886401
SRBD1	chr2_45579825	cg18016822	0.00185274	-0.833771	0.890953	0.942451
SRBD1	chr2_45579825	cg18940723	0.0247607	-1.4213	0.0345198	0.14046
SRBD1	chr2_45579825	cg20335008	0.0386142	-1.39784	0.00113568	0.011636
SRBD1	chr2_45579825	cg20732286	0.0368093	0.221031	0.0667574	0.215189
SRBD1	chr2_45579825	cg23995169	0.0243284	-0.201047	0.122005	0.311452
SRBD1	chr2_45579825	cg24076774	0.00446022	-1.31876	0.766013	0.869224
SRBD1	chr2_45579825	cg25377726	0.0278	-1.72437	0.00617664	0.0410578
SRBD1	chr2_45579825	cg25590579	0.011082	-1.49303	0.205398	0.424719
ARV1	chr1_230995821	cg00018229	0.119093	-1.53236	0.00122136	0.0122943
ARV1	chr1_230995821	cg01805856	-0.0845462	2.10419	0.303912	0.527725
ARV1	chr1_230995821	cg02099313	0.0964422	-1.44393	0.0154085	0.0800695
ARV1	chr1_230995821	cg02844629	0.0452409	-1.1611	0.237224	0.46272
ARV1	chr1_230995821	cg03017653	0.200088	-2.14151	9.69296e-05	0.0017423
ARV1	chr1_230995821	cg05776488	0.0620889	-1.66446	0.0468037	0.170262
ARV1	chr1_230995821	cg06078874	0.0102942	-1.8283	0.758467	0.864197
ARV1	chr1_230995821	cg06707168	0.0700689	-1.35473	0.0436413	0.162295
ARV1	chr1_230995821	cg07011025	-0.0322957	-1.12145	0.45808	0.671049
ARV1	chr1_230995821	cg08270913	0.0539319	-1.07567	0.0132707	0.0715813
ARV1	chr1_230995821	cg10324224	0.00886584	0.256411	0.859911	0.925475
ARV1	chr1_230995821	cg12741407	-0.186295	3.00253	0.00174762	0.0160292
ARV1	chr1_230995821	cg16024801	0.0559133	0.224515	0.318061	0.541549
ARV1	chr1_230995821	cg16563656	0.0386815	-1.3003	0.164652	0.372748
ARV1	chr1_230995821	cg20136738	0.0589607	-1.41064	0.0554908	0.19057
ARV1	chr1_230995821	cg20395940	0.054531	-0.968509	0.0337876	0.138489
ARV1	chr1_230995821	cg27306913	0.0296095	-0.891319	0.331052	0.554854
NRCAM	chr7_108234700	cg00019997	-0.00411506	0.807594	0.900806	0.947276
NRCAM	chr7_108234700	cg00280235	0.256043	-2.73666	8.6252e-05	0.00159756
NRCAM	chr7_108234700	cg01693328	0.142053	-1.35201	2.29513e-07	1.34656e-05
NRCAM	chr7_108234700	cg02804240	0.108137	-0.500784	0.013184	0.0712234
NRCAM	chr7_108234700	cg02824443	0.0619797	-0.40134	0.0694331	0.2211
NRCAM	chr7_108234700	cg03514928	0.061063	-0.0252227	0.0471047	0.170974
NRCAM	chr7_108234700	cg05412664	-0.395341	3.58385	1.37488e-08	1.36217e-06
NRCAM	chr7_108234700	cg05466901	-0.195728	1.7214	2.2983e-10	5.61319e-08
NRCAM	chr7_108234700	cg06002804	0.0175932	0.699942	0.692077	0.826208
NRCAM	chr7_108234700	cg06269204	0.0466468	0.531408	0.18643	0.401289
NRCAM	chr7_108234700	cg06292947	-0.419475	3.6153	5.224e-08	4.09422e-06
NRCAM	chr7_108234700	cg06570167	-0.543299	4.96537	1.43638e-08	1.38393e-06
NRCAM	chr7_108234700	cg07516712	0.277152	-2.41101	9.65571e-08	6.62773e-06
NRCAM	chr7_108234700	cg07925411	0.00746789	0.777555	0.801245	0.893752
NRCAM	chr7_108234700	cg09561125	-0.159332	1.9046	5.62543e-07	2.84411e-05
NRCAM	chr7_108234700	cg11747586	0.0874442	-0.0416626	0.0198975	0.095987
NRCAM	chr7_108234700	cg12355813	0.115818	-1.19048	0.000231471	0.003419
NRCAM	chr7_108234700	cg14242526	-0.0106102	1.20036	0.75139	0.859415
NRCAM	chr7_108234700	cg15531930	0.0490446	-0.921743	0.120686	0.310116
NRCAM	chr7_108234700	cg15919396	-0.421738	3.71326	1.62776e-09	2.34175e-07
NRCAM	chr7_108234700	cg16073236	0.125281	-0.931329	0.00110063	0.0113656
NRCAM	chr7_108234700	cg17583077	-0.181712	1.62701	2.28466e-06	8.8537e-05
NRCAM	chr7_108234700	cg17885062	-0.194394	1.62626	1.49514e-06	6.28077e-05
NRCAM	chr7_108234700	cg18893000	0.0471594	-0.379489	0.536843	0.728883
NRCAM	chr7_108234700	cg19055872	0.0729201	0.0525707	0.0728156	0.22757
NRCAM	chr7_108234700	cg20811317	-0.00854821	1.12448	0.829329	0.908386
NRCAM	chr7_108234700	cg23543795	0.119645	-1.05346	2.0008e-05	0.000495577
NRCAM	chr7_108234700	cg23636623	-0.00208882	1.05941	0.944011	0.971675
NRCAM	chr7_108234700	cg24188919	-0.227082	2.06822	8.84195e-10	1.49771e-07
NRCAM	chr7_108234700	cg24429533	0.0624501	-0.817861	0.000187725	0.00289925
NRCAM	chr7_108234700	cg25311470	0.0961921	-1.23698	6.07997e-08	4.62695e-06
NRCAM	chr7_108234700	cg25994871	0.102508	-0.561029	0.00773657	0.0486524
NRCAM	chr7_108234700	cg26573382	0.0971093	-0.493419	0.0305602	0.129256
NRCAM	chr7_108234700	cg26652447	-0.261683	2.05363	3.23424e-07	1.78769e-05
DNAH10	chr12_123757912	cg00026119	-0.0310752	2.84892	0.509514	0.710062
DNAH10	chr12_123757912	cg00084347	0.0181033	-0.000643841	0.204206	0.423754
DNAH10	chr12_123757912	cg00107285	-0.00118058	0.661947	0.968988	0.985217
DNAH10	chr12_123757912	cg01172345	-0.019094	1.08454	0.535376	0.728211
DNAH10	chr12_123757912	cg01224393	-0.0295505	1.8824	0.637652	0.794384
DNAH10	chr12_123757912	cg01240444	-0.064927	0.620124	0.0128225	0.0698681
DNAH10	chr12_123757912	cg01493783	-0.0078363	0.792584	0.747438	0.856943
DNAH10	chr12_123757912	cg01812919	-0.0104092	1.48611	0.793315	0.88752
DNAH10	chr12_123757912	cg01923881	0.0190356	0.512662	0.34524	0.568024
DNAH10	chr12_123757912	cg02070232	-0.0239262	1.05251	0.350662	0.572742
DNAH10	chr12_123757912	cg02823783	-0.265364	2.40706	0.000136302	0.00226495
DNAH10	chr12_123757912	cg03151529	0.0332573	-0.329321	0.203732	0.423264
DNAH10	chr12_123757912	cg03313451	0.0384703	1.80109	0.585874	0.763286
DNAH10	chr12_123757912	cg03785426	0.0350797	0.0920478	0.0551064	0.189844
DNAH10	chr12_123757912	cg05615595	-0.0270461	0.700219	0.245179	0.472106
DNAH10	chr12_123757912	cg05851395	0.0188627	0.124855	0.339178	0.561554
DNAH10	chr12_123757912	cg06745944	-0.0599829	0.275367	0.028433	0.123186
DNAH10	chr12_123757912	cg07347092	-0.239494	1.98112	0.000230679	0.0034121
DNAH10	chr12_123757912	cg07784986	0.0106706	0.254738	0.570202	0.752957
DNAH10	chr12_123757912	cg09372386	-0.01365	0.989312	0.815012	0.900647
DNAH10	chr12_123757912	cg10036003	0.0470034	0.016603	0.320386	0.54392
DNAH10	chr12_123757912	cg10575376	-0.146475	0.941822	0.00391444	0.0294691
DNAH10	chr12_123757912	cg10796568	0.0063123	0.861395	0.863751	0.927889
DNAH10	chr12_123757912	cg10902909	0.0379302	-0.383139	0.0303516	0.128477
DNAH10	chr12_123757912	cg11026555	-0.14725	1.04305	0.00903196	0.0541402
DNAH10	chr12_123757912	cg11196544	-0.0311081	0.978373	0.111032	0.295573
DNAH10	chr12_123757912	cg11549958	0.0110648	1.06352	0.775652	0.874962
DNAH10	chr12_123757912	cg11961642	-0.0338952	1.0389	0.0544436	0.188267
DNAH10	chr12_123757912	cg12597309	0.0259556	-0.248057	0.192304	0.408905
DNAH10	chr12_123757912	cg12702615	0.0180519	0.532731	0.334989	0.558422
DNAH10	chr12_123757912	cg12906108	-0.0147486	1.36308	0.85122	0.920555
DNAH10	chr12_123757912	cg13568854	-5.91884e-05	1.33187	0.99873	0.999519
DNAH10	chr12_123757912	cg13579661	-0.0133713	2.93343	0.614533	0.778703
DNAH10	chr12_123757912	cg14808040	0.00446291	0.140021	0.788587	0.88414
DNAH10	chr12_123757912	cg15633096	-0.0112903	0.598153	0.413855	0.629352
DNAH10	chr12_123757912	cg15997315	-0.0144455	1.08501	0.464068	0.675726
DNAH10	chr12_123757912	cg16111073	-0.010984	1.74433	0.734077	0.850861
DNAH10	chr12_123757912	cg16353049	-0.0191462	2.25389	0.579065	0.759029
DNAH10	chr12_123757912	cg17211612	0.0736905	2.04578	0.46534	0.676809
DNAH10	chr12_123757912	cg17562584	0.0311652	0.284968	0.1316	0.325828
DNAH10	chr12_123757912	cg18594669	-0.0350495	1.14228	0.162642	0.36963
DNAH10	chr12_123757912	cg19896347	0.0182864	1.50115	0.537764	0.729496
DNAH10	chr12_123757912	cg20079734	-0.0263459	1.41978	0.253373	0.479997
DNAH10	chr12_123757912	cg20130615	0.00834343	0.837157	0.668433	0.81526
DNAH10	chr12_123757912	cg20752847	-0.00302526	0.0317513	0.859707	0.925475
DNAH10	chr12_123757912	cg22036614	-0.0496796	1.29861	0.0393553	0.151801
DNAH10	chr12_123757912	cg22135566	0.0105817	0.0974	0.499546	0.703296
DNAH10	chr12_123757912	cg22457172	0.0219927	-0.211572	0.151035	0.353661
DNAH10	chr12_123757912	cg22472488	-0.0227517	0.637358	0.237815	0.463021
DNAH10	chr12_123757912	cg23325240	-0.0127852	0.344101	0.556222	0.743799
DNAH10	chr12_123757912	cg23523434	-0.0324625	1.24927	0.26043	0.486055
DNAH10	chr12_123757912	cg24284036	0.028569	0.876909	0.378	0.598126
DNAH10	chr12_123757912	cg24978470	-0.0407477	1.26652	0.241748	0.467472
DNAH10	chr12_123757912	cg26639596	0.017818	-0.252599	0.141778	0.341974
DNAH10	chr12_123757912	cg26986180	-0.0864303	0.726518	0.00231304	0.0199931
DNAH10	chr12_123757912	cg27125645	-0.0471203	0.412815	0.0823482	0.246823
DNAH10	chr12_123757912	cg27150598	-0.00943291	0.873668	0.729071	0.848942
HIP1	chr7_75556687	cg00029161	-0.041234	0.00158775	0.000880007	0.00957703
HIP1	chr7_75556687	cg00361176	0.0692961	-0.305949	1.85209e-06	7.48104e-05
HIP1	chr7_75556687	cg01621268	0.0421408	-0.735643	8.1113e-08	5.67899e-06
HIP1	chr7_75556687	cg02075822	0.0841353	-0.529625	0.00138006	0.01352
HIP1	chr7_75556687	cg02229461	0.0713429	-0.265633	7.39513e-06	0.000225112
HIP1	chr7_75556687	cg02713883	0.0461975	0.485171	0.0238995	0.108859
HIP1	chr7_75556687	cg03837935	-0.19691	0.800068	1.167e-09	1.87495e-07
HIP1	chr7_75556687	cg04200641	0.0238193	-1.08541	0.000875822	0.00955128
HIP1	chr7_75556687	cg05145297	0.0562823	-0.222751	1.47523e-05	0.000386357
HIP1	chr7_75556687	cg05857060	-0.0460934	0.838824	0.000740729	0.00836467
HIP1	chr7_75556687	cg06147752	0.0177677	0.880421	0.371129	0.592159
HIP1	chr7_75556687	cg07211516	0.00859393	1.20426	0.770196	0.871206
HIP1	chr7_75556687	cg09346547	-0.0157014	0.820386	0.0615611	0.204071
HIP1	chr7_75556687	cg09725962	-0.00699993	-0.627136	0.497933	0.702107
HIP1	chr7_75556687	cg09844775	0.0148592	-2.30094	0.257915	0.483627
HIP1	chr7_75556687	cg13071326	0.0178255	-1.09974	0.0206633	0.0988636
HIP1	chr7_75556687	cg13430094	0.00985453	-1.1071	0.473698	0.682371
HIP1	chr7_75556687	cg13702357	-0.0567397	0.348082	0.000351377	0.00470085
HIP1	chr7_75556687	cg14177084	0.0262048	-0.134139	0.0116015	0.0648772
HIP1	chr7_75556687	cg14774677	0.0292893	-1.7709	0.00701762	0.0451864
HIP1	chr7_75556687	cg14796107	0.0161069	1.55495	0.172023	0.38267
HIP1	chr7_75556687	cg16272084	-0.0650117	1.30595	0.00507522	0.0357718
HIP1	chr7_75556687	cg16561155	0.0153946	1.0907	0.422968	0.637456
HIP1	chr7_75556687	cg17787366	0.005903	-1.04412	0.528266	0.723318
HIP1	chr7_75556687	cg18432145	-0.0312333	0.0440388	0.00058632	0.00692636
HIP1	chr7_75556687	cg18724912	0.0310885	0.48381	0.161231	0.367446
HIP1	chr7_75556687	cg19119531	-0.0380857	-0.270485	0.00509991	0.0358736
HIP1	chr7_75556687	cg19507725	0.063762	-0.138492	2.6281e-05	0.000613116
HIP1	chr7_75556687	cg20307391	0.0105928	0.891814	0.570528	0.753198
HIP1	chr7_75556687	cg20580578	-0.00412825	2.40318	0.866127	0.929216
HIP1	chr7_75556687	cg22340644	0.00845228	-0.991023	0.316241	0.539763
HIP1	chr7_75556687	cg22605936	-0.0401445	1.99853	0.00890234	0.0535277
HIP1	chr7_75556687	cg23657377	-0.00435029	-1.55386	0.687394	0.824182
HIP1	chr7_75556687	cg24650353	0.0294866	-1.2902	3.89159e-05	0.000851448
HIP1	chr7_75556687	cg25444339	0.0801997	-0.769473	2.28294e-09	3.11369e-07
HIP1	chr7_75556687	cg26406292	-0.0196655	0.409792	0.551777	0.741479
HIP1	chr7_75556687	cg26596975	-0.00415764	1.05258	0.844001	0.916697
HIP1	chr7_75556687	cg27415006	0.0207886	-1.37663	0.00980961	0.0573292
HIP1	chr7_75556687	cg27531731	0.0378096	-0.377003	0.00080866	0.00896784
HIP1	chr7_75556687	ch_7_1651382F	0.0429347	-1.1791	3.9485e-05	0.000858133
BRCA2	chr13_32333399	cg00031759	0.0236596	-0.879271	0.0157789	0.0815693
BRCA2	chr13_32333399	cg00214044	-0.0381799	0.994786	0.00174914	0.0160292
BRCA2	chr13_32333399	cg01115236	-0.0350617	2.03293	0.141049	0.340631
BRCA2	chr13_32333399	cg03777697	0.0330706	0.94724	0.115458	0.301178
BRCA2	chr13_32333399	cg05153735	-0.00126287	-0.928352	0.912351	0.953764
BRCA2	chr13_32333399	cg05918473	-0.0778607	1.88525	0.0122887	0.0677101
BRCA2	chr13_32333399	cg06935361	0.0281525	0.452142	0.324585	0.547861
BRCA2	chr13_32333399	cg08092513	-0.00750136	0.743307	0.55707	0.744319
BRCA2	chr13_32333399	cg08157964	-0.0306226	-2.71794	0.265197	0.491464
BRCA2	chr13_32333399	cg08193369	-0.00120793	-0.918733	0.932197	0.964274
BRCA2	chr13_32333399	cg09102017	0.0221287	-1.47195	0.121721	0.311452
BRCA2	chr13_32333399	cg09698981	0.0190025	-0.74113	0.293793	0.517773
BRCA2	chr13_32333399	cg12836863	-0.0222637	0.688381	0.482568	0.690445
BRCA2	chr13_32333399	cg13096407	-0.00536642	0.453617	0.664448	0.812514
BRCA2	chr13_32333399	cg14932124	-0.0032985	1.40484	0.914952	0.955626
BRCA2	chr13_32333399	cg15516583	-0.0167274	0.86468	0.470698	0.680848
BRCA2	chr13_32333399	cg15865175	-0.0214546	-0.72235	0.137933	0.336721
BRCA2	chr13_32333399	cg16725191	0.00146395	1.68846	0.946976	0.972345
BRCA2	chr13_32333399	cg19634711	-0.000754502	-0.939798	0.968585	0.985094
BRCA2	chr13_32333399	cg20073910	0.00364463	-0.888514	0.700976	0.832322
BRCA2	chr13_32333399	cg22682213	-0.010014	-1.36894	0.520423	0.718576
BRCA2	chr13_32333399	cg23628297	0.00513475	0.871211	0.783011	0.880237
BRCA2	chr13_32333399	cg24234117	0.0345386	0.795444	0.0908185	0.261954
BRCA2	chr13_32333399	cg25497877	0.0116492	-0.9347	0.324074	0.54735
BRCA2	chr13_32333399	cg25753010	0.0102001	-0.61656	0.646716	0.799884
BRCA2	chr13_32333399	cg26458617	-0.0552832	0.480755	0.0421168	0.158251
BRCA2	chr13_32333399	cg27253386	0.0121961	-0.918795	0.338037	0.561097
UGP2	chr2_63885573	cg00034376	0.00983133	-1.10509	0.202716	0.422153
UGP2	chr2_63885573	cg00074365	0.0313703	-0.193668	0.069659	0.22118
UGP2	chr2_63885573	cg00219598	0.0442203	0.702061	0.00475761	0.0342222
UGP2	chr2_63885573	cg00268500	0.0121054	-0.868181	0.256394	0.481987
UGP2	chr2_63885573	cg00626599	0.0100637	-0.916195	0.242721	0.468894
UGP2	chr2_63885573	cg00677236	-0.0104677	-0.866393	0.197169	0.414704
UGP2	chr2_63885573	cg00794552	-0.0077284	-1.48983	0.480062	0.688069
UGP2	chr2_63885573	cg02541582	0.0164393	-0.677053	0.0177763	0.0885609
UGP2	chr2_63885573	cg02996639	-0.0312444	-1.80478	0.0776659	0.236969
UGP2	chr2_63885573	cg03055492	0.000832842	-1.09162	0.915677	0.955909
UGP2	chr2_63885573	cg03956680	0.0259016	-1.08132	0.0342492	0.139629
UGP2	chr2_63885573	cg05528339	0.104395	-1.2748	0.0027702	0.0230711
UGP2	chr2_63885573	cg06546722	-0.00999057	-0.89069	0.363792	0.585884
UGP2	chr2_63885573	cg07186094	-0.0181214	-1.37489	0.149065	0.350925
UGP2	chr2_63885573	cg09356401	0.0186956	-1.14025	0.0972179	0.274016
UGP2	chr2_63885573	cg10238396	-0.00462263	-2.13381	0.809452	0.897359
UGP2	chr2_63885573	cg12639422	0.0134204	-1.0602	0.157053	0.362182
UGP2	chr2_63885573	cg12876517	0.0220643	0.595718	0.355515	0.576603
UGP2	chr2_63885573	cg13089137	0.0131104	-1.05707	0.311181	0.535216
UGP2	chr2_63885573	cg14150252	0.0366652	-0.774525	0.00196229	0.017629
UGP2	chr2_63885573	cg14552895	-0.0172505	-0.671569	0.0575872	0.194955
UGP2	chr2_63885573	cg15400200	-0.00493116	-1.66633	0.701854	0.832446
UGP2	chr2_63885573	cg17360256	-0.0195602	0.988169	0.333848	0.557139
UGP2	chr2_63885573	cg18951587	0.0199576	-0.869802	0.0149807	0.078275
UGP2	chr2_63885573	cg19029220	0.0366954	-1.21553	5.25337e-05	0.00107546
UGP2	chr2_63885573	cg19857280	0.0102283	-2.74494	0.596919	0.770111
UGP2	chr2_63885573	cg19880899	-0.0319221	-2.09976	0.138175	0.337154
UGP2	chr2_63885573	cg19915305	0.0346923	-0.775607	0.00617599	0.0410578
UGP2	chr2_63885573	cg19931529	0.00730672	1.16437	0.708449	0.836443
UGP2	chr2_63885573	cg22963296	0.0517653	0.620324	0.0137897	0.0735839
UGP2	chr2_63885573	cg25042022	0.00877712	-1.43086	0.667881	0.814928
UGP2	chr2_63885573	cg26080673	-0.00185768	-1.91501	0.939928	0.968992
PLK4	chr4_127893271	cg00038665	0.00351601	1.58965	0.760269	0.865324
PLK4	chr4_127893271	cg00608362	0.0197187	-2.26039	0.0417607	0.157816
PLK4	chr4_127893271	cg02085815	0.0047721	-2.23164	0.745269	0.856324
PLK4	chr4_127893271	cg02898019	-0.00577677	0.76673	0.544094	0.73457
PLK4	chr4_127893271	cg02994288	0.0134567	-0.670039	0.0524733	0.183998
PLK4	chr4_127893271	cg06015521	-0.00651412	1.02995	0.66451	0.812514
PLK4	chr4_127893271	cg10233639	-0.00438675	0.94449	0.717933	0.8429
PLK4	chr4_127893271	cg10393416	-0.00128684	-0.601518	0.923395	0.959857
PLK4	chr4_127893271	cg11014917	0.01469	-0.90469	0.0180075	0.0893538
PLK4	chr4_127893271	cg17765713	0.0222691	-0.953959	0.00562076	0.0385812
PLK4	chr4_127893271	cg20088535	0.00428153	-1.97218	0.738215	0.853825
PLK4	chr4_127893271	cg21722058	0.00633157	-1.15634	0.259371	0.485115
PLK4	chr4_127893271	cg22112850	0.011077	1.21941	0.369645	0.591
PLK4	chr4_127893271	cg23607253	0.0125925	-1.05028	0.0535714	0.186603
PLK4	chr4_127893271	cg23677608	0.0088275	-1.72157	0.329529	0.553405
PLK4	chr4_127893271	cg26882168	-2.61492e-05	0.991569	0.998245	0.999519
PDE10A	chr6_165396475	cg00039129	-0.1412	2.41436	0.00165904	0.0154188
PDE10A	chr6_165396475	cg00121876	-0.0252443	0.405584	0.448003	0.660434
PDE10A	chr6_165396475	cg00361017	-0.0541369	0.761394	0.0024787	0.0211122
PDE10A	chr6_165396475	cg00386035	0.0456368	-0.453841	0.0976556	0.274733
PDE10A	chr6_165396475	cg00549973	-0.0951121	2.36522	0.0542767	0.187814
PDE10A	chr6_165396475	cg00699486	-0.0751913	1.37013	0.0183927	0.090643
PDE10A	chr6_165396475	cg00777627	-0.0293049	0.236876	0.284965	0.508494
PDE10A	chr6_165396475	cg00786178	-0.121875	2.12178	0.00320949	0.0257889
PDE10A	chr6_165396475	cg00794911	0.120783	-1.02553	6.43675e-05	0.00126353
PDE10A	chr6_165396475	cg00849713	-0.138538	1.25267	2.64733e-11	8.68819e-09
PDE10A	chr6_165396475	cg00910924	-0.110198	2.25318	0.0124896	0.0685821
PDE10A	chr6_165396475	cg00951302	-0.0165261	0.114307	0.509414	0.710062
PDE10A	chr6_165396475	cg01101997	0.00207059	1.01961	0.958002	0.978708
PDE10A	chr6_165396475	cg01152056	0.0775402	-1.20462	0.00174067	0.0159934
PDE10A	chr6_165396475	cg01244421	-0.0677837	1.70906	0.115798	0.301429
PDE10A	chr6_165396475	cg01266853	-0.160362	2.43477	0.00060384	0.00709343
PDE10A	chr6_165396475	cg01269620	-0.110665	1.03925	0.000414846	0.00533911
PDE10A	chr6_165396475	cg01431114	-0.00877166	-0.0658501	0.59721	0.770126
PDE10A	chr6_165396475	cg01473249	-0.114794	1.67158	0.000374209	0.00496205
PDE10A	chr6_165396475	cg01486752	0.0452631	-1.20041	0.00182747	0.0166325
PDE10A	chr6_165396475	cg01535080	-0.0444915	0.507066	0.0334539	0.137508
PDE10A	chr6_165396475	cg01579841	-0.0170173	-0.105287	0.377526	0.597916
PDE10A	chr6_165396475	cg01737304	-0.0360823	0.847802	0.157044	0.362182
PDE10A	chr6_165396475	cg01832737	-0.0248202	0.114638	0.276383	0.501112
PDE10A	chr6_165396475	cg01857838	-0.0323875	0.636015	0.455032	0.667983
PDE10A	chr6_165396475	cg01939453	-0.0902438	0.828974	0.0127767	0.0697404
PDE10A	chr6_165396475	cg02146929	-0.0601708	0.741634	0.0361036	0.145059
PDE10A	chr6_165396475	cg02149532	-0.0999696	1.54725	0.0246288	0.110962
PDE10A	chr6_165396475	cg02174765	-0.0149007	0.0874654	0.495802	0.700584
PDE10A	chr6_165396475	cg02461341	-0.168766	2.16451	0.00015194	0.00246245
PDE10A	chr6_165396475	cg02465374	-0.0838087	-0.208132	0.315361	0.538854
PDE10A	chr6_165396475	cg02621130	-0.116085	0.742088	5.91252e-05	0.00118273
PDE10A	chr6_165396475	cg02861775	-0.0783442	1.94399	0.11179	0.296244
PDE10A	chr6_165396475	cg03643966	-0.188055	2.90059	0.00123824	0.0124321
PDE10A	chr6_165396475	cg03814644	-0.0540422	1.11374	0.149466	0.351318
PDE10A	chr6_165396475	cg03841251	-0.11428	1.6967	0.00181118	0.0165371
PDE10A	chr6_165396475	cg04230050	-0.024586	0.392707	0.238205	0.463435
PDE10A	chr6_165396475	cg04249522	-0.229161	1.98985	2.35688e-06	9.06398e-05
PDE10A	chr6_165396475	cg04326854	-0.0388771	0.335234	0.137823	0.336542
PDE10A	chr6_165396475	cg04387240	-0.0689396	0.548064	0.00131633	0.0129804
PDE10A	chr6_165396475	cg04434244	-0.0931754	1.06176	8.80641e-05	0.0016197
PDE10A	chr6_165396475	cg05295566	-0.0075049	0.201375	0.833852	0.910528
PDE10A	chr6_165396475	cg05310694	-0.0340636	0.194847	0.0247552	0.111197
PDE10A	chr6_165396475	cg05468948	-0.10223	1.12879	2.70002e-06	0.00010091
PDE10A	chr6_165396475	cg05575273	-0.230739	3.66125	0.00170769	0.0157317
PDE10A	chr6_165396475	cg05787951	-0.112316	1.46318	6.26781e-05	0.00124197
PDE10A	chr6_165396475	cg05842175	0.0380521	-0.0315089	0.14533	0.345775
PDE10A	chr6_165396475	cg05861708	-0.0686879	0.411739	0.00691134	0.0446664
PDE10A	chr6_165396475	cg06128195	-0.0421211	0.0513303	0.0675306	0.217015
PDE10A	chr6_165396475	cg06341957	-0.033207	0.151648	0.0240361	0.108998
PDE10A	chr6_165396475	cg06545143	-0.0905558	0.777706	4.52033e-07	2.42207e-05
PDE10A	chr6_165396475	cg06650206	-0.0973705	1.50909	0.0144034	0.0760886
PDE10A	chr6_165396475	cg06738040	-0.197139	2.09692	0.000644296	0.00750987
PDE10A	chr6_165396475	cg07126525	-0.259895	2.46632	1.73166e-06	7.13471e-05
PDE10A	chr6_165396475	cg07298859	-0.0677883	2.28908	0.0675048	0.216999
PDE10A	chr6_165396475	cg07508299	-0.11755	2.04533	0.00122179	0.0122943
PDE10A	chr6_165396475	cg07724407	-0.0190933	1.27414	0.564492	0.748653
PDE10A	chr6_165396475	cg08249371	-0.0734029	1.31348	0.0172355	0.0865235
PDE10A	chr6_165396475	cg08267489	-0.0675533	0.39998	0.00330256	0.0262754
PDE10A	chr6_165396475	cg08302912	-0.0845607	1.81745	0.0272951	0.119538
PDE10A	chr6_165396475	cg08321824	0.0816276	0.891797	0.119084	0.307051
PDE10A	chr6_165396475	cg08412584	0.0106334	0.0229458	0.596765	0.770111
PDE10A	chr6_165396475	cg08419582	-0.0756306	1.03895	0.000251267	0.00363974
PDE10A	chr6_165396475	cg08447044	-0.169131	2.07575	2.44982e-06	9.26867e-05
PDE10A	chr6_165396475	cg08564636	-0.0685425	1.20468	0.0544655	0.188281
PDE10A	chr6_165396475	cg08886973	-0.120785	1.03788	5.5082e-05	0.00111459
PDE10A	chr6_165396475	cg09085041	-0.151059	1.46137	7.33781e-08	5.27819e-06
PDE10A	chr6_165396475	cg09149149	0.013978	-0.635318	0.545299	0.735574
PDE10A	chr6_165396475	cg09454230	-0.11612	2.15764	0.0440634	0.163209
PDE10A	chr6_165396475	cg09456829	-0.129928	2.51867	0.0123809	0.0681114
PDE10A	chr6_165396475	cg09997714	0.0875268	-0.313456	0.0199862	0.0962713
PDE10A	chr6_165396475	cg10087227	-0.118402	1.51584	0.000163736	0.00260186
PDE10A	chr6_165396475	cg10675138	-0.0611824	0.661887	0.0133497	0.0718965
PDE10A	chr6_165396475	cg10706100	0.0137224	-0.701375	0.544129	0.73457
PDE10A	chr6_165396475	cg10855945	0.0778317	-0.185947	0.10505	0.285887
PDE10A	chr6_165396475	cg10856894	-0.110633	2.16441	0.022249	0.103481
PDE10A	chr6_165396475	cg11175473	-0.0271192	0.286582	0.471478	0.680848
PDE10A	chr6_165396475	cg11324712	0.0251353	-0.127203	0.141069	0.340631
PDE10A	chr6_165396475	cg11759749	-0.0743459	1.02951	0.0369803	0.1475
PDE10A	chr6_165396475	cg12005824	0.0107255	-1.72923	0.735942	0.852511
PDE10A	chr6_165396475	cg12167167	-0.00232458	-0.347925	0.947716	0.972831
PDE10A	chr6_165396475	cg12174276	-0.0138215	-0.0553945	0.184067	0.397834
PDE10A	chr6_165396475	cg12182971	-0.0738206	1.63927	0.107176	0.289469
PDE10A	chr6_165396475	cg12201943	-0.220627	3.90828	0.00326575	0.0260938
PDE10A	chr6_165396475	cg12254291	-0.0136329	-0.299017	0.593654	0.769034
PDE10A	chr6_165396475	cg12320986	-0.215616	2.64519	5.33084e-06	0.000173327
PDE10A	chr6_165396475	cg12363472	-0.080973	1.02152	5.19898e-05	0.0010748
PDE10A	chr6_165396475	cg12532095	0.0649703	-0.498967	0.0476803	0.172664
PDE10A	chr6_165396475	cg13160528	-0.0852042	1.56343	0.0574144	0.194653
PDE10A	chr6_165396475	cg13351249	-0.133455	1.81181	0.00870065	0.0527869
PDE10A	chr6_165396475	cg13384212	-0.0234305	0.566253	0.575352	0.755765
PDE10A	chr6_165396475	cg13540418	-0.12841	2.34024	0.00370949	0.0284774
PDE10A	chr6_165396475	cg14006515	-0.161083	2.84745	0.0632383	0.207995
PDE10A	chr6_165396475	cg14026561	-0.154219	1.11218	0.000158737	0.00254902
PDE10A	chr6_165396475	cg14222434	-0.0562623	1.08631	0.261564	0.487392
PDE10A	chr6_165396475	cg14230803	0.0434034	-0.779002	0.0392427	0.151653
PDE10A	chr6_165396475	cg14393693	0.0587716	-0.741105	0.258645	0.484621
PDE10A	chr6_165396475	cg14759494	0.0225912	-0.0839876	0.269525	0.494875
PDE10A	chr6_165396475	cg14768923	-0.0265717	1.02362	0.534859	0.728211
PDE10A	chr6_165396475	cg15382659	0.0102588	0.246999	0.77972	0.87776
PDE10A	chr6_165396475	cg15553391	0.077519	-0.777645	6.31205e-06	0.000201487
PDE10A	chr6_165396475	cg15586054	0.0766736	-0.697167	0.00127449	0.012711
PDE10A	chr6_165396475	cg15951362	-0.0700806	1.08323	0.00415162	0.0308565
PDE10A	chr6_165396475	cg15988950	-0.0873092	1.64338	0.0068937	0.0445798
PDE10A	chr6_165396475	cg16043046	-0.17287	3.02413	0.0162955	0.0834576
PDE10A	chr6_165396475	cg16051195	-0.0975138	0.996298	2.86289e-06	0.000104396
PDE10A	chr6_165396475	cg16157288	-0.0412887	0.908603	0.247817	0.474267
PDE10A	chr6_165396475	cg16206344	0.0528348	-0.354194	0.149806	0.351861
PDE10A	chr6_165396475	cg16289417	-0.0911421	0.450588	0.0143499	0.0758441
PDE10A	chr6_165396475	cg16638945	0.0292545	0.699918	0.414533	0.63011
PDE10A	chr6_165396475	cg16799273	-0.0204866	-0.0290761	0.341086	0.563665
PDE10A	chr6_165396475	cg17270257	-0.0742869	0.896755	0.00379601	0.0289501
PDE10A	chr6_165396475	cg17345450	0.0608824	-0.417198	0.00193493	0.0174576
PDE10A	chr6_165396475	cg17537347	-0.0816232	0.941564	0.00545538	0.0376676
PDE10A	chr6_165396475	cg17586885	0.0571173	-0.499841	0.00070086	0.00804419
PDE10A	chr6_165396475	cg17712241	-0.119775	2.04047	0.000712954	0.00812088
PDE10A	chr6_165396475	cg17967260	0.0757311	-0.669022	0.00710826	0.0456581
PDE10A	chr6_165396475	cg17968511	-0.0578677	1.24486	0.14511	0.345645
PDE10A	chr6_165396475	cg18132363	0.0836448	-1.07822	1.4543e-09	2.18187e-07
PDE10A	chr6_165396475	cg18215454	-0.0556648	1.18167	0.10654	0.28852
PDE10A	chr6_165396475	cg18403193	0.0997009	-0.937084	5.38592e-05	0.00109406
PDE10A	chr6_165396475	cg18727102	0.077729	-1.31735	0.000243901	0.00355756
PDE10A	chr6_165396475	cg18770076	-0.0855751	2.29236	0.0372247	0.147766
PDE10A	chr6_165396475	cg18902795	-0.152656	2.30754	0.000297185	0.0041448
PDE10A	chr6_165396475	cg19001113	-0.105155	1.67945	0.0450716	0.165794
PDE10A	chr6_165396475	cg19042390	0.0908541	-0.982431	5.79196e-05	0.00116527
PDE10A	chr6_165396475	cg19953427	-0.130536	1.31913	6.08168e-07	2.99858e-05
PDE10A	chr6_165396475	cg19997946	-0.0126238	0.0210902	0.578318	0.758457
PDE10A	chr6_165396475	cg20026524	-0.110779	2.11936	0.00201023	0.0179256
PDE10A	chr6_165396475	cg20026582	-0.0704817	1.55589	0.0247102	0.111185
PDE10A	chr6_165396475	cg20121927	-0.136978	2.26811	0.000172081	0.00271351
PDE10A	chr6_165396475	cg20418529	0.0744061	-0.606761	0.0675608	0.217046
PDE10A	chr6_165396475	cg20598720	-0.213256	3.14951	5.57397e-05	0.00112357
PDE10A	chr6_165396475	cg20673819	-0.130424	2.80811	0.0164856	0.0839219
PDE10A	chr6_165396475	cg21306006	-0.123771	1.08414	3.30378e-09	4.2835e-07
PDE10A	chr6_165396475	cg21429087	-0.0795407	0.564808	0.00145336	0.014005
PDE10A	chr6_165396475	cg21600850	0.0161978	-0.724749	0.484593	0.692125
PDE10A	chr6_165396475	cg21607700	-0.0459842	1.19705	0.502212	0.705246
PDE10A	chr6_165396475	cg21984374	0.0349002	-0.152364	0.264644	0.49104
PDE10A	chr6_165396475	cg22058990	0.0409147	-0.827104	0.00614328	0.0410279
PDE10A	chr6_165396475	cg22066180	-0.16574	1.33067	0.000225177	0.00334485
PDE10A	chr6_165396475	cg22141696	-0.0568128	1.29175	0.426434	0.640671
PDE10A	chr6_165396475	cg22623236	-0.0403297	1.28291	0.170065	0.38106
PDE10A	chr6_165396475	cg22809491	-0.0106178	-0.343484	0.453563	0.666665
PDE10A	chr6_165396475	cg22976242	-0.00824044	0.838707	0.738763	0.853973
PDE10A	chr6_165396475	cg23105605	-0.0870695	1.81153	0.011509	0.0646339
PDE10A	chr6_165396475	cg23193497	-0.136249	1.26856	0.0768307	0.235584
PDE10A	chr6_165396475	cg23321220	0.0601118	-0.417844	0.001964	0.017629
PDE10A	chr6_165396475	cg23808916	-0.0492364	1.14301	0.292337	0.516243
PDE10A	chr6_165396475	cg23864398	-0.243437	3.77257	0.00122086	0.0122943
PDE10A	chr6_165396475	cg23939504	-0.0938343	1.55799	0.0337535	0.138414
PDE10A	chr6_165396475	cg24133115	-0.0656788	0.690066	0.0139099	0.0739827
PDE10A	chr6_165396475	cg24156393	0.0622023	-0.450523	0.0881592	0.257252
PDE10A	chr6_165396475	cg24282460	-0.0705688	1.67503	0.0229862	0.105507
PDE10A	chr6_165396475	cg24480453	0.0476865	-0.736467	0.000110292	0.00192356
PDE10A	chr6_165396475	cg24696967	0.00866141	0.31402	0.847036	0.9183
PDE10A	chr6_165396475	cg25115145	-0.0216601	0.528734	0.287833	0.510998
PDE10A	chr6_165396475	cg25325645	-0.0492663	1.70517	0.269771	0.494934
PDE10A	chr6_165396475	cg25436486	-0.129104	1.61108	0.0551453	0.189881
PDE10A	chr6_165396475	cg25595431	-0.0792544	1.99411	0.171616	0.382033
PDE10A	chr6_165396475	cg25641223	-0.0970542	1.15845	0.118677	0.306227
PDE10A	chr6_165396475	cg26309457	-0.146429	1.34599	1.87954e-06	7.53394e-05
PDE10A	chr6_165396475	cg26577169	0.0271045	-0.581242	0.101039	0.280422
PDE10A	chr6_165396475	cg26723355	-0.0598129	0.556052	0.0639394	0.209122
PDE10A	chr6_165396475	cg27028202	-0.180365	3.01743	0.00155569	0.0147454
PDE10A	chr6_165396475	cg27088830	-0.010511	-0.613548	0.685995	0.823394
PDE10A	chr6_165396475	cg27101095	0.0232741	0.0382072	0.47579	0.683474
PDE10A	chr6_165396475	cg27239981	-0.18499	2.3125	2.38412e-05	0.000570342
PCDHGA1	chr5_141433209	cg00039176	-0.0260424	0.103737	0.601988	0.77108
PCDHGA1	chr5_141433209	cg00048743	-0.0448301	1.00045	0.553744	0.741734
PCDHGA1	chr5_141433209	cg00104845	-0.0341455	0.391128	0.394556	0.612693
PCDHGA1	chr5_141433209	cg00281842	-0.0839925	0.597975	0.352274	0.573319
PCDHGA1	chr5_141433209	cg00283283	0.0377575	-0.543301	0.204775	0.423754
PCDHGA1	chr5_141433209	cg00395420	-0.0560131	1.92372	0.445251	0.657947
PCDHGA1	chr5_141433209	cg00543335	-0.0457827	1.64089	0.305186	0.52915
PCDHGA1	chr5_141433209	cg00589850	0.00967097	0.0381797	0.731304	0.849575
PCDHGA1	chr5_141433209	cg00633552	-0.0346093	0.945072	0.302729	0.526337
PCDHGA1	chr5_141433209	cg00758915	0.0256061	-0.134887	0.602868	0.771128
PCDHGA1	chr5_141433209	cg00808170	-0.00874676	0.475213	0.699169	0.831372
PCDHGA1	chr5_141433209	cg00888801	-0.0147921	0.951409	0.656831	0.806169
PCDHGA1	chr5_141433209	cg00943245	-0.00257988	0.424716	0.944678	0.971695
PCDHGA1	chr5_141433209	cg00978427	-0.0284149	0.546537	0.185857	0.400562
PCDHGA1	chr5_141433209	cg01000954	0.00192425	2.36544	0.977347	0.989406
PCDHGA1	chr5_141433209	cg01169021	-0.0549069	0.729545	0.123991	0.314453
PCDHGA1	chr5_141433209	cg01224715	-0.0216822	0.995898	0.599662	0.770732
PCDHGA1	chr5_141433209	cg01301252	-0.0316562	1.16185	0.468926	0.679684
PCDHGA1	chr5_141433209	cg01311360	-0.0218171	-0.233179	0.524904	0.720593
PCDHGA1	chr5_141433209	cg01418385	0.0188407	-0.633973	0.375959	0.596963
PCDHGA1	chr5_141433209	cg01561869	-0.0658706	1.38585	0.154657	0.359099
PCDHGA1	chr5_141433209	cg01575930	-0.0283141	1.28882	0.348326	0.570156
PCDHGA1	chr5_141433209	cg01911239	-0.0262162	0.550447	0.291574	0.515506
PCDHGA1	chr5_141433209	cg02022733	-0.0825795	1.19331	0.061933	0.204599
PCDHGA1	chr5_141433209	cg02022808	-0.024142	0.155136	0.569253	0.751892
PCDHGA1	chr5_141433209	cg02056653	-0.0074568	0.0977109	0.803406	0.894073
PCDHGA1	chr5_141433209	cg02146079	-0.0931096	2.00486	0.0728303	0.22757
PCDHGA1	chr5_141433209	cg02151604	-0.0273509	-0.0794776	0.368671	0.590524
PCDHGA1	chr5_141433209	cg02161292	-0.0423553	1.22818	0.266651	0.491464
PCDHGA1	chr5_141433209	cg02267483	-0.0353415	0.651996	0.265567	0.491464
PCDHGA1	chr5_141433209	cg02331883	-0.0381465	0.842474	0.380442	0.600271
PCDHGA1	chr5_141433209	cg02430347	-0.211873	1.58492	0.202678	0.422153
PCDHGA1	chr5_141433209	cg02452944	-0.0344895	0.445296	0.296024	0.519787
PCDHGA1	chr5_141433209	cg02575448	-0.0577002	0.787703	0.301788	0.525987
PCDHGA1	chr5_141433209	cg02580763	-0.0279312	0.698461	0.225618	0.450284
PCDHGA1	chr5_141433209	cg02707176	-0.0661056	1.11875	0.249047	0.47468
PCDHGA1	chr5_141433209	cg02722596	-0.11756	1.78204	0.0822482	0.246721
PCDHGA1	chr5_141433209	cg02780295	-0.106619	0.844721	0.0503275	0.178742
PCDHGA1	chr5_141433209	cg02867763	-0.0288353	0.374097	0.269455	0.494875
PCDHGA1	chr5_141433209	cg03086707	-0.0701667	1.16255	0.111642	0.29622
PCDHGA1	chr5_141433209	cg03415916	-0.0448692	1.26195	0.175281	0.38627
PCDHGA1	chr5_141433209	cg03447435	0.0168303	-0.381639	0.62523	0.785604
PCDHGA1	chr5_141433209	cg03486475	-0.0571884	1.04158	0.0956729	0.27095
PCDHGA1	chr5_141433209	cg03617826	-0.0429257	0.548114	0.197973	0.41574
PCDHGA1	chr5_141433209	cg03640756	-0.0574738	0.336947	0.139612	0.338771
PCDHGA1	chr5_141433209	cg03828328	-0.0268348	0.573867	0.30842	0.533174
PCDHGA1	chr5_141433209	cg03835609	-0.0467961	0.429386	0.388354	0.607512
PCDHGA1	chr5_141433209	cg03892308	-0.0337444	1.10943	0.288002	0.510998
PCDHGA1	chr5_141433209	cg03898577	0.0265345	-0.547402	0.571245	0.753292
PCDHGA1	chr5_141433209	cg03898832	0.00449775	1.15129	0.909339	0.951816
PCDHGA1	chr5_141433209	cg04080041	0.0222948	-0.338628	0.403327	0.619714
PCDHGA1	chr5_141433209	cg04117404	-0.0350626	0.649403	0.514604	0.713919
PCDHGA1	chr5_141433209	cg04160343	0.00712662	0.416741	0.858827	0.924877
PCDHGA1	chr5_141433209	cg04242499	-0.0642662	0.99014	0.0839405	0.248985
PCDHGA1	chr5_141433209	cg04246144	0.084513	-1.38649	0.0156417	0.0810406
PCDHGA1	chr5_141433209	cg04438558	-0.0377213	1.06264	0.360378	0.581903
PCDHGA1	chr5_141433209	cg04453180	-0.0496503	0.555901	0.323677	0.546855
PCDHGA1	chr5_141433209	cg04503600	-0.0253607	0.614062	0.460675	0.672974
PCDHGA1	chr5_141433209	cg04637478	-0.0236055	0.437672	0.471236	0.680848
PCDHGA1	chr5_141433209	cg04726784	-0.0387919	0.144292	0.23375	0.459247
PCDHGA1	chr5_141433209	cg04773864	-0.0638859	1.39486	0.0927348	0.265296
PCDHGA1	chr5_141433209	cg04830357	-0.0451081	0.428168	0.282503	0.505534
PCDHGA1	chr5_141433209	cg04964031	-0.0172776	0.246305	0.573558	0.754164
PCDHGA1	chr5_141433209	cg05043461	-0.0264497	0.382661	0.279114	0.502344
PCDHGA1	chr5_141433209	cg05149776	0.011221	0.402159	0.734194	0.850861
PCDHGA1	chr5_141433209	cg05197036	0.0730347	-0.0975403	0.0648105	0.211051
PCDHGA1	chr5_141433209	cg05494467	-0.0309666	0.517928	0.370826	0.591856
PCDHGA1	chr5_141433209	cg05670472	-0.0261941	0.309718	0.473565	0.682313
PCDHGA1	chr5_141433209	cg05870739	-0.0618802	0.523237	0.103383	0.283036
PCDHGA1	chr5_141433209	cg05942150	-0.0516875	1.24443	0.172822	0.383878
PCDHGA1	chr5_141433209	cg05983326	-0.0204072	0.11968	0.560499	0.746048
PCDHGA1	chr5_141433209	cg06065872	-0.0308484	1.58416	0.560073	0.745581
PCDHGA1	chr5_141433209	cg06428620	-0.0254137	0.405805	0.633473	0.791258
PCDHGA1	chr5_141433209	cg06572465	-0.0541584	0.579811	0.170727	0.381142
PCDHGA1	chr5_141433209	cg06575035	-0.0207056	0.745533	0.464089	0.675726
PCDHGA1	chr5_141433209	cg06742719	-0.0364828	0.381879	0.223526	0.448932
PCDHGA1	chr5_141433209	cg06757585	-0.0480914	0.971097	0.187065	0.40145
PCDHGA1	chr5_141433209	cg06776159	-0.0610177	1.63708	0.134706	0.331074
PCDHGA1	chr5_141433209	cg07017875	0.00745766	-0.0238189	0.722543	0.844534
PCDHGA1	chr5_141433209	cg07179872	-0.0435135	0.737072	0.231063	0.456819
PCDHGA1	chr5_141433209	cg07231479	-0.0377706	0.712059	0.138831	0.337734
PCDHGA1	chr5_141433209	cg07242860	0.0742844	-1.1052	0.0361709	0.145086
PCDHGA1	chr5_141433209	cg07445963	-0.0122834	0.0418168	0.638845	0.794719
PCDHGA1	chr5_141433209	cg07448606	-0.0654057	-0.082453	0.25655	0.481987
PCDHGA1	chr5_141433209	cg07489502	-0.0796497	1.39225	0.229666	0.455343
PCDHGA1	chr5_141433209	cg07520649	0.0155247	0.611641	0.673107	0.817506
PCDHGA1	chr5_141433209	cg07524997	-0.0289988	0.494463	0.649354	0.801255
PCDHGA1	chr5_141433209	cg07539798	-0.0154203	0.632429	0.639314	0.794719
PCDHGA1	chr5_141433209	cg07608474	0.00495237	1.60834	0.921752	0.958961
PCDHGA1	chr5_141433209	cg07613945	-0.0440035	0.818663	0.392906	0.611575
PCDHGA1	chr5_141433209	cg07620533	-0.0704527	0.84452	0.0377454	0.148747
PCDHGA1	chr5_141433209	cg07717903	-0.057705	1.386	0.112988	0.297469
PCDHGA1	chr5_141433209	cg07730329	-0.0427012	0.771273	0.239562	0.464785
PCDHGA1	chr5_141433209	cg07802710	-0.00946916	0.0828286	0.739644	0.853974
PCDHGA1	chr5_141433209	cg07804076	0.0132535	0.162105	0.584119	0.762333
PCDHGA1	chr5_141433209	cg07870307	-0.0931707	0.610328	0.0386036	0.150381
PCDHGA1	chr5_141433209	cg08155325	-0.00373397	0.504242	0.923772	0.959857
PCDHGA1	chr5_141433209	cg08292467	-0.0327339	0.751127	0.31287	0.536538
PCDHGA1	chr5_141433209	cg08395122	-0.0199376	0.325633	0.391367	0.610174
PCDHGA1	chr5_141433209	cg08616061	-0.0469657	0.698542	0.122036	0.311452
PCDHGA1	chr5_141433209	cg08714996	-0.0207939	0.139479	0.73957	0.853974
PCDHGA1	chr5_141433209	cg08935238	-0.00937258	0.356931	0.745806	0.856324
PCDHGA1	chr5_141433209	cg09066326	-0.0684397	1.05078	0.211666	0.433909
PCDHGA1	chr5_141433209	cg09484752	-0.00398891	0.70467	0.887681	0.940614
PCDHGA1	chr5_141433209	cg09570348	-0.0632485	1.2201	0.377377	0.59777
PCDHGA1	chr5_141433209	cg09581226	-0.0342298	0.843192	0.175554	0.38627
PCDHGA1	chr5_141433209	cg09639151	-0.0590042	0.762521	0.0657724	0.212471
PCDHGA1	chr5_141433209	cg10475970	-0.015479	0.280001	0.529446	0.723354
PCDHGA1	chr5_141433209	cg10599384	0.0221699	-0.630767	0.551317	0.741064
PCDHGA1	chr5_141433209	cg10679597	-0.0142473	0.40612	0.691842	0.826053
PCDHGA1	chr5_141433209	cg10858746	-0.117571	1.08735	0.147062	0.347865
PCDHGA1	chr5_141433209	cg10917547	-0.03072	0.3986	0.396471	0.613759
PCDHGA1	chr5_141433209	cg10933186	-0.0227887	1.80517	0.719646	0.843495
PCDHGA1	chr5_141433209	cg11011625	-0.0285109	-0.152623	0.520376	0.718576
PCDHGA1	chr5_141433209	cg11014124	0.04912	0.297364	0.536902	0.728883
PCDHGA1	chr5_141433209	cg11086421	-0.0432143	0.450962	0.173257	0.384033
PCDHGA1	chr5_141433209	cg11210069	-0.10033	1.80227	0.0322338	0.133944
PCDHGA1	chr5_141433209	cg11236452	0.0145077	-0.0608176	0.637284	0.79411
PCDHGA1	chr5_141433209	cg11499025	0.0682525	-0.920841	0.0240683	0.108998
PCDHGA1	chr5_141433209	cg11647681	-0.0357878	0.551828	0.234084	0.459247
PCDHGA1	chr5_141433209	cg11655243	-0.020476	0.961178	0.684729	0.822771
PCDHGA1	chr5_141433209	cg11830096	-0.145746	3.11222	0.0294711	0.125918
PCDHGA1	chr5_141433209	cg11884778	0.0127312	0.48593	0.747937	0.857209
PCDHGA1	chr5_141433209	cg11907797	-0.0430222	0.787415	0.128442	0.321001
PCDHGA1	chr5_141433209	cg12145907	-0.044147	0.57772	0.196538	0.414218
PCDHGA1	chr5_141433209	cg12304520	-0.0379056	0.828302	0.475274	0.683136
PCDHGA1	chr5_141433209	cg12375722	0.0233202	-0.248162	0.441154	0.653553
PCDHGA1	chr5_141433209	cg12459904	-0.070246	1.08132	0.0538464	0.186879
PCDHGA1	chr5_141433209	cg12487540	-0.0165838	0.159663	0.557869	0.744818
PCDHGA1	chr5_141433209	cg12487901	0.0110663	-0.175186	0.681431	0.820875
PCDHGA1	chr5_141433209	cg12608145	-0.00337365	0.132917	0.909441	0.951816
PCDHGA1	chr5_141433209	cg12648074	-0.0486042	0.72121	0.11826	0.305528
PCDHGA1	chr5_141433209	cg12877039	-0.0171925	0.536889	0.614762	0.778703
PCDHGA1	chr5_141433209	cg13023584	-0.108983	2.39377	0.0757032	0.233252
PCDHGA1	chr5_141433209	cg13048822	-0.0102739	0.0867218	0.664452	0.812514
PCDHGA1	chr5_141433209	cg13307880	-0.0214506	0.407763	0.515528	0.714266
PCDHGA1	chr5_141433209	cg13598256	-0.0101727	-0.0234512	0.787928	0.883684
PCDHGA1	chr5_141433209	cg13718539	-0.0335721	0.578869	0.279394	0.502344
PCDHGA1	chr5_141433209	cg13725516	-0.0178426	0.375335	0.418219	0.633219
PCDHGA1	chr5_141433209	cg13933262	-0.0896678	0.659149	0.178923	0.39033
PCDHGA1	chr5_141433209	cg13972793	-0.00714313	0.166983	0.701633	0.832322
PCDHGA1	chr5_141433209	cg13993336	-0.111461	0.803594	0.106956	0.289051
PCDHGA1	chr5_141433209	cg14253517	0.00417436	-0.00417787	0.878081	0.935539
PCDHGA1	chr5_141433209	cg14458068	-0.0601463	1.00225	0.13164	0.325828
PCDHGA1	chr5_141433209	cg14468658	-0.0569395	0.901044	0.0248398	0.111434
PCDHGA1	chr5_141433209	cg14472390	-0.0290844	1.13099	0.347278	0.568973
PCDHGA1	chr5_141433209	cg14566959	-0.0204634	1.16357	0.599314	0.770732
PCDHGA1	chr5_141433209	cg14672084	-0.0482834	1.33372	0.595672	0.769465
PCDHGA1	chr5_141433209	cg14681511	-0.00885685	0.267703	0.839205	0.913677
PCDHGA1	chr5_141433209	cg14738170	-0.0129685	0.0227555	0.615943	0.779016
PCDHGA1	chr5_141433209	cg15004405	0.000809452	0.352956	0.970225	0.98533
PCDHGA1	chr5_141433209	cg15124968	-0.0885271	0.574615	0.0438587	0.16253
PCDHGA1	chr5_141433209	cg15361590	-0.0533607	0.615817	0.144363	0.344609
PCDHGA1	chr5_141433209	cg15672768	-0.0243046	0.52409	0.309275	0.533471
PCDHGA1	chr5_141433209	cg15829642	-0.114765	2.54138	0.072458	0.227068
PCDHGA1	chr5_141433209	cg15874877	-0.044702	1.32342	0.247484	0.47397
PCDHGA1	chr5_141433209	cg15949044	-0.0697219	0.763419	0.0905958	0.261704
PCDHGA1	chr5_141433209	cg15988320	0.0428184	-0.831279	0.110803	0.295269
PCDHGA1	chr5_141433209	cg16032518	-0.0105573	0.249569	0.704041	0.83292
PCDHGA1	chr5_141433209	cg16263180	-0.0164785	0.462003	0.593548	0.768992
PCDHGA1	chr5_141433209	cg16316394	-0.0220833	0.936132	0.628214	0.78768
PCDHGA1	chr5_141433209	cg16467262	-0.0294566	0.0834002	0.302199	0.526143
PCDHGA1	chr5_141433209	cg16505764	-0.0373292	0.866022	0.274613	0.499219
PCDHGA1	chr5_141433209	cg16574737	-0.0680044	1.11928	0.0273551	0.11968
PCDHGA1	chr5_141433209	cg16579158	-0.0438584	0.864022	0.149027	0.350914
PCDHGA1	chr5_141433209	cg17108383	-0.00985816	1.18435	0.833781	0.910528
PCDHGA1	chr5_141433209	cg17227466	-0.0914133	1.08902	0.259111	0.484801
PCDHGA1	chr5_141433209	cg17297238	-0.0267614	0.49318	0.435085	0.64789
PCDHGA1	chr5_141433209	cg17451176	-0.05343	0.548812	0.0653344	0.212028
PCDHGA1	chr5_141433209	cg17557357	0.0151604	-0.286017	0.698734	0.831372
PCDHGA1	chr5_141433209	cg17588578	-0.0275753	0.792654	0.435522	0.64813
PCDHGA1	chr5_141433209	cg17760318	-0.0141161	0.3886	0.52157	0.719259
PCDHGA1	chr5_141433209	cg17857974	-0.0130836	0.327144	0.802517	0.894057
PCDHGA1	chr5_141433209	cg17982031	-0.0140194	0.317354	0.681025	0.820875
PCDHGA1	chr5_141433209	cg18054674	-0.0540777	1.2724	0.159546	0.365123
PCDHGA1	chr5_141433209	cg18118262	-0.0676596	1.22047	0.535343	0.728211
PCDHGA1	chr5_141433209	cg18164784	-0.0764164	1.10076	0.0872395	0.254922
PCDHGA1	chr5_141433209	cg18507379	-0.0518329	0.602563	0.339275	0.561554
PCDHGA1	chr5_141433209	cg18617005	-0.061029	0.777743	0.246078	0.472835
PCDHGA1	chr5_141433209	cg18713748	-0.0319469	0.538652	0.396166	0.613759
PCDHGA1	chr5_141433209	cg18781988	-0.038313	0.700968	0.426647	0.640671
PCDHGA1	chr5_141433209	cg18839637	-0.0181151	0.615048	0.572041	0.753868
PCDHGA1	chr5_141433209	cg18839750	-0.00994754	0.0242065	0.766557	0.8693
PCDHGA1	chr5_141433209	cg18858331	-0.0142797	0.377071	0.523144	0.719825
PCDHGA1	chr5_141433209	cg18869485	0.00324769	0.419428	0.946923	0.972345
PCDHGA1	chr5_141433209	cg18878616	-0.024853	0.260442	0.715931	0.841301
PCDHGA1	chr5_141433209	cg19037350	-4.65752e-05	0.162732	0.998695	0.999519
PCDHGA1	chr5_141433209	cg19247475	-0.0346261	0.84417	0.23548	0.460867
PCDHGA1	chr5_141433209	cg19595107	0.0112385	-0.586811	0.558798	0.745229
PCDHGA1	chr5_141433209	cg19689427	-0.0225453	0.8307	0.498774	0.702705
PCDHGA1	chr5_141433209	cg19748485	-0.0374557	0.667396	0.115127	0.300463
PCDHGA1	chr5_141433209	cg19754283	0.0396081	-0.161875	0.669472	0.81526
PCDHGA1	chr5_141433209	cg19814830	-0.0490756	2.08264	0.350942	0.572742
PCDHGA1	chr5_141433209	cg20433262	0.0125303	-0.205348	0.506277	0.707696
PCDHGA1	chr5_141433209	cg20717585	-0.0459932	0.796764	0.0504459	0.17892
PCDHGA1	chr5_141433209	cg20938085	-0.0372975	0.925954	0.266185	0.491464
PCDHGA1	chr5_141433209	cg21073350	-0.0626447	1.02405	0.0491162	0.176786
PCDHGA1	chr5_141433209	cg21101631	-0.0180069	0.293176	0.561614	0.746379
PCDHGA1	chr5_141433209	cg21117330	-0.00747229	0.54651	0.850621	0.92015
PCDHGA1	chr5_141433209	cg21157357	-0.0224891	1.038	0.600722	0.770868
PCDHGA1	chr5_141433209	cg21161927	-0.0144505	-0.335987	0.709645	0.836817
PCDHGA1	chr5_141433209	cg21185686	-0.0314241	0.587985	0.369399	0.590859
PCDHGA1	chr5_141433209	cg21580428	-0.0576662	0.550702	0.0318017	0.132743
PCDHGA1	chr5_141433209	cg21627409	-0.0235031	0.136434	0.491127	0.696287
PCDHGA1	chr5_141433209	cg21752383	0.00540627	0.364216	0.895463	0.944572
PCDHGA1	chr5_141433209	cg21908557	-0.0382226	0.428474	0.218161	0.441822
PCDHGA1	chr5_141433209	cg21930118	-0.0396272	0.163811	0.285092	0.508499
PCDHGA1	chr5_141433209	cg22052948	-0.0470072	1.17129	0.269632	0.494875
PCDHGA1	chr5_141433209	cg22056094	-0.124577	2.33931	0.14875	0.350813
PCDHGA1	chr5_141433209	cg22056102	0.00232034	-0.448478	0.963237	0.981652
PCDHGA1	chr5_141433209	cg22082176	0.0198633	-0.182076	0.384108	0.603786
PCDHGA1	chr5_141433209	cg22151446	-0.0370265	0.450577	0.25371	0.479997
PCDHGA1	chr5_141433209	cg22175873	-0.0325446	0.676289	0.27702	0.501112
PCDHGA1	chr5_141433209	cg22184507	0.0191856	-0.618659	0.612531	0.777703
PCDHGA1	chr5_141433209	cg22463553	-0.0120771	0.561979	0.730581	0.849527
PCDHGA1	chr5_141433209	cg22637837	-0.0728928	1.68053	0.0994153	0.277971
PCDHGA1	chr5_141433209	cg22648135	-0.0677447	0.864624	0.0836028	0.248654
PCDHGA1	chr5_141433209	cg22692868	-0.0152484	0.604952	0.675197	0.817978
PCDHGA1	chr5_141433209	cg22737624	-0.0557674	0.907299	0.191386	0.407529
PCDHGA1	chr5_141433209	cg22847228	-0.0744901	0.585373	0.0372069	0.147766
PCDHGA1	chr5_141433209	cg22861116	-0.0962154	1.43212	0.0416813	0.15763
PCDHGA1	chr5_141433209	cg23074932	-0.0235668	0.592977	0.425608	0.639911
PCDHGA1	chr5_141433209	cg23082339	0.0192042	-0.553407	0.609438	0.775441
PCDHGA1	chr5_141433209	cg23244790	-0.0263297	0.299874	0.440699	0.653335
PCDHGA1	chr5_141433209	cg23347399	-0.0743897	1.18732	0.0697112	0.22118
PCDHGA1	chr5_141433209	cg23348764	-0.0338422	0.380867	0.335816	0.558559
PCDHGA1	chr5_141433209	cg23359276	-0.0915246	0.319637	0.179928	0.391465
PCDHGA1	chr5_141433209	cg23383590	-0.0368296	0.177808	0.278536	0.502189
PCDHGA1	chr5_141433209	cg23445461	-0.079579	0.816556	0.101515	0.280555
PCDHGA1	chr5_141433209	cg23930711	-0.0424355	0.337864	0.313621	0.536949
PCDHGA1	chr5_141433209	cg24024424	0.0094398	-0.0272302	0.691094	0.825884
PCDHGA1	chr5_141433209	cg24066843	-0.0850629	1.84651	0.0760445	0.233788
PCDHGA1	chr5_141433209	cg24155123	0.0529002	-0.53278	0.130286	0.32362
PCDHGA1	chr5_141433209	cg24172509	-0.0226551	1.27873	0.746246	0.856324
PCDHGA1	chr5_141433209	cg24619378	-0.0236461	0.54521	0.394908	0.612693
PCDHGA1	chr5_141433209	cg24633027	-0.0680859	2.27202	0.114698	0.300065
PCDHGA1	chr5_141433209	cg24656271	-0.0810486	1.17635	0.0103186	0.0596626
PCDHGA1	chr5_141433209	cg24755503	0.000382047	-0.0388667	0.990971	0.996158
PCDHGA1	chr5_141433209	cg24921961	-0.0460603	1.37473	0.140317	0.339413
PCDHGA1	chr5_141433209	cg24942747	-0.0206811	0.506915	0.368501	0.590388
PCDHGA1	chr5_141433209	cg24954895	-0.0466774	0.69077	0.143121	0.343644
PCDHGA1	chr5_141433209	cg24996161	-0.0885594	2.08006	0.158509	0.36385
PCDHGA1	chr5_141433209	cg25353450	-0.0604537	0.319463	0.2135	0.435627
PCDHGA1	chr5_141433209	cg25426815	-0.109173	1.40186	0.0773396	0.236042
PCDHGA1	chr5_141433209	cg25564433	-0.0744379	1.6727	0.0420062	0.158061
PCDHGA1	chr5_141433209	cg25592513	-0.00567265	-0.275899	0.829273	0.908386
PCDHGA1	chr5_141433209	cg25600472	-0.0220835	0.794978	0.374552	0.595631
PCDHGA1	chr5_141433209	cg25949304	-0.029946	0.514842	0.514447	0.713919
PCDHGA1	chr5_141433209	cg26275431	-0.0510573	0.694331	0.0849772	0.250612
PCDHGA1	chr5_141433209	cg26337998	-0.0627058	0.582067	0.100382	0.279261
PCDHGA1	chr5_141433209	cg26622291	-0.0220066	0.285711	0.361266	0.582997
PCDHGA1	chr5_141433209	cg26811372	-0.0526635	0.806364	0.27333	0.498217
PCDHGA1	chr5_141433209	cg26826004	-0.0143216	-0.228826	0.553856	0.741734
PCDHGA1	chr5_141433209	cg26843711	-0.038297	0.90122	0.488267	0.693987
PCDHGA1	chr5_141433209	cg26856475	-0.0677946	1.27058	0.0807358	0.243656
PCDHGA1	chr5_141433209	cg26879386	-0.0652928	1.63457	0.029787	0.1267
PCDHGA1	chr5_141433209	cg26890354	0.00772894	-0.216475	0.818314	0.902353
PCDHGA1	chr5_141433209	cg26960988	-0.0563419	1.35842	0.227347	0.452538
PCDHGA1	chr5_141433209	cg26962778	-0.0265509	0.401551	0.209361	0.43112
PCDHGA1	chr5_141433209	cg27305357	-0.0215669	0.293116	0.277182	0.501112
PCDHGA1	chr5_141433209	cg27553119	-0.00333486	0.123751	0.880692	0.936329
PCDHGA1	chr5_141433209	cg27639030	0.0118429	-0.243041	0.604752	0.771808
PCDHGA1	chr5_141433209	cg27665767	-0.0102742	0.308401	0.651787	0.802577
PCDHGA2	chr5_141433209	cg00039176	-0.0260424	0.103737	0.601988	0.77108
PCDHGA2	chr5_141433209	cg00048743	-0.0448301	1.00045	0.553744	0.741734
PCDHGA2	chr5_141433209	cg00104845	-0.0341455	0.391128	0.394556	0.612693
PCDHGA2	chr5_141433209	cg00281842	-0.0839925	0.597975	0.352274	0.573319
PCDHGA2	chr5_141433209	cg00283283	0.0377575	-0.543301	0.204775	0.423754
PCDHGA2	chr5_141433209	cg00395420	-0.0560131	1.92372	0.445251	0.657947
PCDHGA2	chr5_141433209	cg00589850	0.00967097	0.0381797	0.731304	0.849575
PCDHGA2	chr5_141433209	cg00633552	-0.0346093	0.945072	0.302729	0.526337
PCDHGA2	chr5_141433209	cg00758915	0.0256061	-0.134887	0.602868	0.771128
PCDHGA2	chr5_141433209	cg00808170	-0.00874676	0.475213	0.699169	0.831372
PCDHGA2	chr5_141433209	cg00888801	-0.0147921	0.951409	0.656831	0.806169
PCDHGA2	chr5_141433209	cg00943245	-0.00257988	0.424716	0.944678	0.971695
PCDHGA2	chr5_141433209	cg00978427	-0.0284149	0.546537	0.185857	0.400562
PCDHGA2	chr5_141433209	cg01000954	0.00192425	2.36544	0.977347	0.989406
PCDHGA2	chr5_141433209	cg01169021	-0.0549069	0.729545	0.123991	0.314453
PCDHGA2	chr5_141433209	cg01224715	-0.0216822	0.995898	0.599662	0.770732
PCDHGA2	chr5_141433209	cg01301252	-0.0316562	1.16185	0.468926	0.679684
PCDHGA2	chr5_141433209	cg01311360	-0.0218171	-0.233179	0.524904	0.720593
PCDHGA2	chr5_141433209	cg01418385	0.0188407	-0.633973	0.375959	0.596963
PCDHGA2	chr5_141433209	cg01561869	-0.0658706	1.38585	0.154657	0.359099
PCDHGA2	chr5_141433209	cg01575930	-0.0283141	1.28882	0.348326	0.570156
PCDHGA2	chr5_141433209	cg01911239	-0.0262162	0.550447	0.291574	0.515506
PCDHGA2	chr5_141433209	cg02022733	-0.0825795	1.19331	0.061933	0.204599
PCDHGA2	chr5_141433209	cg02022808	-0.024142	0.155136	0.569253	0.751892
PCDHGA2	chr5_141433209	cg02056653	-0.0074568	0.0977109	0.803406	0.894073
PCDHGA2	chr5_141433209	cg02146079	-0.0931096	2.00486	0.0728303	0.22757
PCDHGA2	chr5_141433209	cg02161292	-0.0423553	1.22818	0.266651	0.491464
PCDHGA2	chr5_141433209	cg02267483	-0.0353415	0.651996	0.265567	0.491464
PCDHGA2	chr5_141433209	cg02331883	-0.0381465	0.842474	0.380442	0.600271
PCDHGA2	chr5_141433209	cg02430347	-0.211873	1.58492	0.202678	0.422153
PCDHGA2	chr5_141433209	cg02452944	-0.0344895	0.445296	0.296024	0.519787
PCDHGA2	chr5_141433209	cg02575448	-0.0577002	0.787703	0.301788	0.525987
PCDHGA2	chr5_141433209	cg02580763	-0.0279312	0.698461	0.225618	0.450284
PCDHGA2	chr5_141433209	cg02707176	-0.0661056	1.11875	0.249047	0.47468
PCDHGA2	chr5_141433209	cg02722596	-0.11756	1.78204	0.0822482	0.246721
PCDHGA2	chr5_141433209	cg02780295	-0.106619	0.844721	0.0503275	0.178742
PCDHGA2	chr5_141433209	cg02867763	-0.0288353	0.374097	0.269455	0.494875
PCDHGA2	chr5_141433209	cg03086707	-0.0701667	1.16255	0.111642	0.29622
PCDHGA2	chr5_141433209	cg03415916	-0.0448692	1.26195	0.175281	0.38627
PCDHGA2	chr5_141433209	cg03447435	0.0168303	-0.381639	0.62523	0.785604
PCDHGA2	chr5_141433209	cg03486475	-0.0571884	1.04158	0.0956729	0.27095
PCDHGA2	chr5_141433209	cg03617826	-0.0429257	0.548114	0.197973	0.41574
PCDHGA2	chr5_141433209	cg03640756	-0.0574738	0.336947	0.139612	0.338771
PCDHGA2	chr5_141433209	cg03828328	-0.0268348	0.573867	0.30842	0.533174
PCDHGA2	chr5_141433209	cg03835609	-0.0467961	0.429386	0.388354	0.607512
PCDHGA2	chr5_141433209	cg03892308	-0.0337444	1.10943	0.288002	0.510998
PCDHGA2	chr5_141433209	cg03898577	0.0265345	-0.547402	0.571245	0.753292
PCDHGA2	chr5_141433209	cg03898832	0.00449775	1.15129	0.909339	0.951816
PCDHGA2	chr5_141433209	cg04080041	0.0222948	-0.338628	0.403327	0.619714
PCDHGA2	chr5_141433209	cg04117404	-0.0350626	0.649403	0.514604	0.713919
PCDHGA2	chr5_141433209	cg04160343	0.00712662	0.416741	0.858827	0.924877
PCDHGA2	chr5_141433209	cg04242499	-0.0642662	0.99014	0.0839405	0.248985
PCDHGA2	chr5_141433209	cg04246144	0.084513	-1.38649	0.0156417	0.0810406
PCDHGA2	chr5_141433209	cg04438558	-0.0377213	1.06264	0.360378	0.581903
PCDHGA2	chr5_141433209	cg04453180	-0.0496503	0.555901	0.323677	0.546855
PCDHGA2	chr5_141433209	cg04503600	-0.0253607	0.614062	0.460675	0.672974
PCDHGA2	chr5_141433209	cg04637478	-0.0236055	0.437672	0.471236	0.680848
PCDHGA2	chr5_141433209	cg04726784	-0.0387919	0.144292	0.23375	0.459247
PCDHGA2	chr5_141433209	cg04773864	-0.0638859	1.39486	0.0927348	0.265296
PCDHGA2	chr5_141433209	cg04830357	-0.0451081	0.428168	0.282503	0.505534
PCDHGA2	chr5_141433209	cg04964031	-0.0172776	0.246305	0.573558	0.754164
PCDHGA2	chr5_141433209	cg05043461	-0.0264497	0.382661	0.279114	0.502344
PCDHGA2	chr5_141433209	cg05149776	0.011221	0.402159	0.734194	0.850861
PCDHGA2	chr5_141433209	cg05197036	0.0730347	-0.0975403	0.0648105	0.211051
PCDHGA2	chr5_141433209	cg05494467	-0.0309666	0.517928	0.370826	0.591856
PCDHGA2	chr5_141433209	cg05670472	-0.0261941	0.309718	0.473565	0.682313
PCDHGA2	chr5_141433209	cg05870739	-0.0618802	0.523237	0.103383	0.283036
PCDHGA2	chr5_141433209	cg05942150	-0.0516875	1.24443	0.172822	0.383878
PCDHGA2	chr5_141433209	cg06065872	-0.0308484	1.58416	0.560073	0.745581
PCDHGA2	chr5_141433209	cg06428620	-0.0254137	0.405805	0.633473	0.791258
PCDHGA2	chr5_141433209	cg06572465	-0.0541584	0.579811	0.170727	0.381142
PCDHGA2	chr5_141433209	cg06575035	-0.0207056	0.745533	0.464089	0.675726
PCDHGA2	chr5_141433209	cg06742719	-0.0364828	0.381879	0.223526	0.448932
PCDHGA2	chr5_141433209	cg06757585	-0.0480914	0.971097	0.187065	0.40145
PCDHGA2	chr5_141433209	cg06776159	-0.0610177	1.63708	0.134706	0.331074
PCDHGA2	chr5_141433209	cg07017875	0.00745766	-0.0238189	0.722543	0.844534
PCDHGA2	chr5_141433209	cg07179872	-0.0435135	0.737072	0.231063	0.456819
PCDHGA2	chr5_141433209	cg07231479	-0.0377706	0.712059	0.138831	0.337734
PCDHGA2	chr5_141433209	cg07242860	0.0742844	-1.1052	0.0361709	0.145086
PCDHGA2	chr5_141433209	cg07445963	-0.0122834	0.0418168	0.638845	0.794719
PCDHGA2	chr5_141433209	cg07448606	-0.0654057	-0.082453	0.25655	0.481987
PCDHGA2	chr5_141433209	cg07489502	-0.0796497	1.39225	0.229666	0.455343
PCDHGA2	chr5_141433209	cg07520649	0.0155247	0.611641	0.673107	0.817506
PCDHGA2	chr5_141433209	cg07524997	-0.0289988	0.494463	0.649354	0.801255
PCDHGA2	chr5_141433209	cg07539798	-0.0154203	0.632429	0.639314	0.794719
PCDHGA2	chr5_141433209	cg07608474	0.00495237	1.60834	0.921752	0.958961
PCDHGA2	chr5_141433209	cg07613945	-0.0440035	0.818663	0.392906	0.611575
PCDHGA2	chr5_141433209	cg07620533	-0.0704527	0.84452	0.0377454	0.148747
PCDHGA2	chr5_141433209	cg07717903	-0.057705	1.386	0.112988	0.297469
PCDHGA2	chr5_141433209	cg07730329	-0.0427012	0.771273	0.239562	0.464785
PCDHGA2	chr5_141433209	cg07802710	-0.00946916	0.0828286	0.739644	0.853974
PCDHGA2	chr5_141433209	cg07804076	0.0132535	0.162105	0.584119	0.762333
PCDHGA2	chr5_141433209	cg07870307	-0.0931707	0.610328	0.0386036	0.150381
PCDHGA2	chr5_141433209	cg08155325	-0.00373397	0.504242	0.923772	0.959857
PCDHGA2	chr5_141433209	cg08292467	-0.0327339	0.751127	0.31287	0.536538
PCDHGA2	chr5_141433209	cg08395122	-0.0199376	0.325633	0.391367	0.610174
PCDHGA2	chr5_141433209	cg08616061	-0.0469657	0.698542	0.122036	0.311452
PCDHGA2	chr5_141433209	cg08714996	-0.0207939	0.139479	0.73957	0.853974
PCDHGA2	chr5_141433209	cg08935238	-0.00937258	0.356931	0.745806	0.856324
PCDHGA2	chr5_141433209	cg09066326	-0.0684397	1.05078	0.211666	0.433909
PCDHGA2	chr5_141433209	cg09484752	-0.00398891	0.70467	0.887681	0.940614
PCDHGA2	chr5_141433209	cg09570348	-0.0632485	1.2201	0.377377	0.59777
PCDHGA2	chr5_141433209	cg09581226	-0.0342298	0.843192	0.175554	0.38627
PCDHGA2	chr5_141433209	cg09639151	-0.0590042	0.762521	0.0657724	0.212471
PCDHGA2	chr5_141433209	cg10475970	-0.015479	0.280001	0.529446	0.723354
PCDHGA2	chr5_141433209	cg10679597	-0.0142473	0.40612	0.691842	0.826053
PCDHGA2	chr5_141433209	cg10858746	-0.117571	1.08735	0.147062	0.347865
PCDHGA2	chr5_141433209	cg10917547	-0.03072	0.3986	0.396471	0.613759
PCDHGA2	chr5_141433209	cg10933186	-0.0227887	1.80517	0.719646	0.843495
PCDHGA2	chr5_141433209	cg11011625	-0.0285109	-0.152623	0.520376	0.718576
PCDHGA2	chr5_141433209	cg11014124	0.04912	0.297364	0.536902	0.728883
PCDHGA2	chr5_141433209	cg11086421	-0.0432143	0.450962	0.173257	0.384033
PCDHGA2	chr5_141433209	cg11210069	-0.10033	1.80227	0.0322338	0.133944
PCDHGA2	chr5_141433209	cg11236452	0.0145077	-0.0608176	0.637284	0.79411
PCDHGA2	chr5_141433209	cg11499025	0.0682525	-0.920841	0.0240683	0.108998
PCDHGA2	chr5_141433209	cg11647681	-0.0357878	0.551828	0.234084	0.459247
PCDHGA2	chr5_141433209	cg11655243	-0.020476	0.961178	0.684729	0.822771
PCDHGA2	chr5_141433209	cg11830096	-0.145746	3.11222	0.0294711	0.125918
PCDHGA2	chr5_141433209	cg11907797	-0.0430222	0.787415	0.128442	0.321001
PCDHGA2	chr5_141433209	cg12145907	-0.044147	0.57772	0.196538	0.414218
PCDHGA2	chr5_141433209	cg12304520	-0.0379056	0.828302	0.475274	0.683136
PCDHGA2	chr5_141433209	cg12375722	0.0233202	-0.248162	0.441154	0.653553
PCDHGA2	chr5_141433209	cg12459904	-0.070246	1.08132	0.0538464	0.186879
PCDHGA2	chr5_141433209	cg12487540	-0.0165838	0.159663	0.557869	0.744818
PCDHGA2	chr5_141433209	cg12487901	0.0110663	-0.175186	0.681431	0.820875
PCDHGA2	chr5_141433209	cg12608145	-0.00337365	0.132917	0.909441	0.951816
PCDHGA2	chr5_141433209	cg12648074	-0.0486042	0.72121	0.11826	0.305528
PCDHGA2	chr5_141433209	cg12877039	-0.0171925	0.536889	0.614762	0.778703
PCDHGA2	chr5_141433209	cg13023584	-0.108983	2.39377	0.0757032	0.233252
PCDHGA2	chr5_141433209	cg13048822	-0.0102739	0.0867218	0.664452	0.812514
PCDHGA2	chr5_141433209	cg13307880	-0.0214506	0.407763	0.515528	0.714266
PCDHGA2	chr5_141433209	cg13598256	-0.0101727	-0.0234512	0.787928	0.883684
PCDHGA2	chr5_141433209	cg13718539	-0.0335721	0.578869	0.279394	0.502344
PCDHGA2	chr5_141433209	cg13725516	-0.0178426	0.375335	0.418219	0.633219
PCDHGA2	chr5_141433209	cg13933262	-0.0896678	0.659149	0.178923	0.39033
PCDHGA2	chr5_141433209	cg13972793	-0.00714313	0.166983	0.701633	0.832322
PCDHGA2	chr5_141433209	cg13993336	-0.111461	0.803594	0.106956	0.289051
PCDHGA2	chr5_141433209	cg14253517	0.00417436	-0.00417787	0.878081	0.935539
PCDHGA2	chr5_141433209	cg14458068	-0.0601463	1.00225	0.13164	0.325828
PCDHGA2	chr5_141433209	cg14468658	-0.0569395	0.901044	0.0248398	0.111434
PCDHGA2	chr5_141433209	cg14472390	-0.0290844	1.13099	0.347278	0.568973
PCDHGA2	chr5_141433209	cg14566959	-0.0204634	1.16357	0.599314	0.770732
PCDHGA2	chr5_141433209	cg14672084	-0.0482834	1.33372	0.595672	0.769465
PCDHGA2	chr5_141433209	cg14681511	-0.00885685	0.267703	0.839205	0.913677
PCDHGA2	chr5_141433209	cg14738170	-0.0129685	0.0227555	0.615943	0.779016
PCDHGA2	chr5_141433209	cg15004405	0.000809452	0.352956	0.970225	0.98533
PCDHGA2	chr5_141433209	cg15124968	-0.0885271	0.574615	0.0438587	0.16253
PCDHGA2	chr5_141433209	cg15361590	-0.0533607	0.615817	0.144363	0.344609
PCDHGA2	chr5_141433209	cg15672768	-0.0243046	0.52409	0.309275	0.533471
PCDHGA2	chr5_141433209	cg15829642	-0.114765	2.54138	0.072458	0.227068
PCDHGA2	chr5_141433209	cg15874877	-0.044702	1.32342	0.247484	0.47397
PCDHGA2	chr5_141433209	cg15949044	-0.0697219	0.763419	0.0905958	0.261704
PCDHGA2	chr5_141433209	cg15988320	0.0428184	-0.831279	0.110803	0.295269
PCDHGA2	chr5_141433209	cg16032518	-0.0105573	0.249569	0.704041	0.83292
PCDHGA2	chr5_141433209	cg16316394	-0.0220833	0.936132	0.628214	0.78768
PCDHGA2	chr5_141433209	cg16505764	-0.0373292	0.866022	0.274613	0.499219
PCDHGA2	chr5_141433209	cg16574737	-0.0680044	1.11928	0.0273551	0.11968
PCDHGA2	chr5_141433209	cg16579158	-0.0438584	0.864022	0.149027	0.350914
PCDHGA2	chr5_141433209	cg17108383	-0.00985816	1.18435	0.833781	0.910528
PCDHGA2	chr5_141433209	cg17227466	-0.0914133	1.08902	0.259111	0.484801
PCDHGA2	chr5_141433209	cg17297238	-0.0267614	0.49318	0.435085	0.64789
PCDHGA2	chr5_141433209	cg17451176	-0.05343	0.548812	0.0653344	0.212028
PCDHGA2	chr5_141433209	cg17557357	0.0151604	-0.286017	0.698734	0.831372
PCDHGA2	chr5_141433209	cg17588578	-0.0275753	0.792654	0.435522	0.64813
PCDHGA2	chr5_141433209	cg17760318	-0.0141161	0.3886	0.52157	0.719259
PCDHGA2	chr5_141433209	cg17857974	-0.0130836	0.327144	0.802517	0.894057
PCDHGA2	chr5_141433209	cg17982031	-0.0140194	0.317354	0.681025	0.820875
PCDHGA2	chr5_141433209	cg18054674	-0.0540777	1.2724	0.159546	0.365123
PCDHGA2	chr5_141433209	cg18118262	-0.0676596	1.22047	0.535343	0.728211
PCDHGA2	chr5_141433209	cg18164784	-0.0764164	1.10076	0.0872395	0.254922
PCDHGA2	chr5_141433209	cg18507379	-0.0518329	0.602563	0.339275	0.561554
PCDHGA2	chr5_141433209	cg18617005	-0.061029	0.777743	0.246078	0.472835
PCDHGA2	chr5_141433209	cg18781988	-0.038313	0.700968	0.426647	0.640671
PCDHGA2	chr5_141433209	cg18839637	-0.0181151	0.615048	0.572041	0.753868
PCDHGA2	chr5_141433209	cg18839750	-0.00994754	0.0242065	0.766557	0.8693
PCDHGA2	chr5_141433209	cg18858331	-0.0142797	0.377071	0.523144	0.719825
PCDHGA2	chr5_141433209	cg18869485	0.00324769	0.419428	0.946923	0.972345
PCDHGA2	chr5_141433209	cg18878616	-0.024853	0.260442	0.715931	0.841301
PCDHGA2	chr5_141433209	cg19037350	-4.65752e-05	0.162732	0.998695	0.999519
PCDHGA2	chr5_141433209	cg19247475	-0.0346261	0.84417	0.23548	0.460867
PCDHGA2	chr5_141433209	cg19595107	0.0112385	-0.586811	0.558798	0.745229
PCDHGA2	chr5_141433209	cg19689427	-0.0225453	0.8307	0.498774	0.702705
PCDHGA2	chr5_141433209	cg19748485	-0.0374557	0.667396	0.115127	0.300463
PCDHGA2	chr5_141433209	cg19754283	0.0396081	-0.161875	0.669472	0.81526
PCDHGA2	chr5_141433209	cg19814830	-0.0490756	2.08264	0.350942	0.572742
PCDHGA2	chr5_141433209	cg20433262	0.0125303	-0.205348	0.506277	0.707696
PCDHGA2	chr5_141433209	cg20717585	-0.0459932	0.796764	0.0504459	0.17892
PCDHGA2	chr5_141433209	cg20938085	-0.0372975	0.925954	0.266185	0.491464
PCDHGA2	chr5_141433209	cg21073350	-0.0626447	1.02405	0.0491162	0.176786
PCDHGA2	chr5_141433209	cg21101631	-0.0180069	0.293176	0.561614	0.746379
PCDHGA2	chr5_141433209	cg21117330	-0.00747229	0.54651	0.850621	0.92015
PCDHGA2	chr5_141433209	cg21157357	-0.0224891	1.038	0.600722	0.770868
PCDHGA2	chr5_141433209	cg21161927	-0.0144505	-0.335987	0.709645	0.836817
PCDHGA2	chr5_141433209	cg21185686	-0.0314241	0.587985	0.369399	0.590859
PCDHGA2	chr5_141433209	cg21580428	-0.0576662	0.550702	0.0318017	0.132743
PCDHGA2	chr5_141433209	cg21627409	-0.0235031	0.136434	0.491127	0.696287
PCDHGA2	chr5_141433209	cg21752383	0.00540627	0.364216	0.895463	0.944572
PCDHGA2	chr5_141433209	cg21908557	-0.0382226	0.428474	0.218161	0.441822
PCDHGA2	chr5_141433209	cg22052948	-0.0470072	1.17129	0.269632	0.494875
PCDHGA2	chr5_141433209	cg22056094	-0.124577	2.33931	0.14875	0.350813
PCDHGA2	chr5_141433209	cg22082176	0.0198633	-0.182076	0.384108	0.603786
PCDHGA2	chr5_141433209	cg22151446	-0.0370265	0.450577	0.25371	0.479997
PCDHGA2	chr5_141433209	cg22175873	-0.0325446	0.676289	0.27702	0.501112
PCDHGA2	chr5_141433209	cg22463553	-0.0120771	0.561979	0.730581	0.849527
PCDHGA2	chr5_141433209	cg22637837	-0.0728928	1.68053	0.0994153	0.277971
PCDHGA2	chr5_141433209	cg22648135	-0.0677447	0.864624	0.0836028	0.248654
PCDHGA2	chr5_141433209	cg22692868	-0.0152484	0.604952	0.675197	0.817978
PCDHGA2	chr5_141433209	cg22737624	-0.0557674	0.907299	0.191386	0.407529
PCDHGA2	chr5_141433209	cg22847228	-0.0744901	0.585373	0.0372069	0.147766
PCDHGA2	chr5_141433209	cg22861116	-0.0962154	1.43212	0.0416813	0.15763
PCDHGA2	chr5_141433209	cg23074932	-0.0235668	0.592977	0.425608	0.639911
PCDHGA2	chr5_141433209	cg23082339	0.0192042	-0.553407	0.609438	0.775441
PCDHGA2	chr5_141433209	cg23244790	-0.0263297	0.299874	0.440699	0.653335
PCDHGA2	chr5_141433209	cg23347399	-0.0743897	1.18732	0.0697112	0.22118
PCDHGA2	chr5_141433209	cg23348764	-0.0338422	0.380867	0.335816	0.558559
PCDHGA2	chr5_141433209	cg23359276	-0.0915246	0.319637	0.179928	0.391465
PCDHGA2	chr5_141433209	cg23383590	-0.0368296	0.177808	0.278536	0.502189
PCDHGA2	chr5_141433209	cg23445461	-0.079579	0.816556	0.101515	0.280555
PCDHGA2	chr5_141433209	cg23930711	-0.0424355	0.337864	0.313621	0.536949
PCDHGA2	chr5_141433209	cg24024424	0.0094398	-0.0272302	0.691094	0.825884
PCDHGA2	chr5_141433209	cg24066843	-0.0850629	1.84651	0.0760445	0.233788
PCDHGA2	chr5_141433209	cg24155123	0.0529002	-0.53278	0.130286	0.32362
PCDHGA2	chr5_141433209	cg24172509	-0.0226551	1.27873	0.746246	0.856324
PCDHGA2	chr5_141433209	cg24619378	-0.0236461	0.54521	0.394908	0.612693
PCDHGA2	chr5_141433209	cg24633027	-0.0680859	2.27202	0.114698	0.300065
PCDHGA2	chr5_141433209	cg24656271	-0.0810486	1.17635	0.0103186	0.0596626
PCDHGA2	chr5_141433209	cg24921961	-0.0460603	1.37473	0.140317	0.339413
PCDHGA2	chr5_141433209	cg24942747	-0.0206811	0.506915	0.368501	0.590388
PCDHGA2	chr5_141433209	cg24954895	-0.0466774	0.69077	0.143121	0.343644
PCDHGA2	chr5_141433209	cg24996161	-0.0885594	2.08006	0.158509	0.36385
PCDHGA2	chr5_141433209	cg25353450	-0.0604537	0.319463	0.2135	0.435627
PCDHGA2	chr5_141433209	cg25426815	-0.109173	1.40186	0.0773396	0.236042
PCDHGA2	chr5_141433209	cg25564433	-0.0744379	1.6727	0.0420062	0.158061
PCDHGA2	chr5_141433209	cg25592513	-0.00567265	-0.275899	0.829273	0.908386
PCDHGA2	chr5_141433209	cg25600472	-0.0220835	0.794978	0.374552	0.595631
PCDHGA2	chr5_141433209	cg25949304	-0.029946	0.514842	0.514447	0.713919
PCDHGA2	chr5_141433209	cg26275431	-0.0510573	0.694331	0.0849772	0.250612
PCDHGA2	chr5_141433209	cg26337998	-0.0627058	0.582067	0.100382	0.279261
PCDHGA2	chr5_141433209	cg26811372	-0.0526635	0.806364	0.27333	0.498217
PCDHGA2	chr5_141433209	cg26826004	-0.0143216	-0.228826	0.553856	0.741734
PCDHGA2	chr5_141433209	cg26843711	-0.038297	0.90122	0.488267	0.693987
PCDHGA2	chr5_141433209	cg26856475	-0.0677946	1.27058	0.0807358	0.243656
PCDHGA2	chr5_141433209	cg26879386	-0.0652928	1.63457	0.029787	0.1267
PCDHGA2	chr5_141433209	cg26890354	0.00772894	-0.216475	0.818314	0.902353
PCDHGA2	chr5_141433209	cg26960988	-0.0563419	1.35842	0.227347	0.452538
PCDHGA2	chr5_141433209	cg26962778	-0.0265509	0.401551	0.209361	0.43112
PCDHGA2	chr5_141433209	cg27305357	-0.0215669	0.293116	0.277182	0.501112
PCDHGA2	chr5_141433209	cg27553119	-0.00333486	0.123751	0.880692	0.936329
PCDHGA2	chr5_141433209	cg27639030	0.0118429	-0.243041	0.604752	0.771808
PCDHGA2	chr5_141433209	cg27665767	-0.0102742	0.308401	0.651787	0.802577
PCDHGB2	chr5_141433209	cg00039176	-0.0260424	0.103737	0.601988	0.77108
PCDHGB2	chr5_141433209	cg00048743	-0.0448301	1.00045	0.553744	0.741734
PCDHGB2	chr5_141433209	cg00104845	-0.0341455	0.391128	0.394556	0.612693
PCDHGB2	chr5_141433209	cg00281842	-0.0839925	0.597975	0.352274	0.573319
PCDHGB2	chr5_141433209	cg00283283	0.0377575	-0.543301	0.204775	0.423754
PCDHGB2	chr5_141433209	cg00589850	0.00967097	0.0381797	0.731304	0.849575
PCDHGB2	chr5_141433209	cg00633552	-0.0346093	0.945072	0.302729	0.526337
PCDHGB2	chr5_141433209	cg00758915	0.0256061	-0.134887	0.602868	0.771128
PCDHGB2	chr5_141433209	cg00808170	-0.00874676	0.475213	0.699169	0.831372
PCDHGB2	chr5_141433209	cg00888801	-0.0147921	0.951409	0.656831	0.806169
PCDHGB2	chr5_141433209	cg00943245	-0.00257988	0.424716	0.944678	0.971695
PCDHGB2	chr5_141433209	cg00978427	-0.0284149	0.546537	0.185857	0.400562
PCDHGB2	chr5_141433209	cg01000954	0.00192425	2.36544	0.977347	0.989406
PCDHGB2	chr5_141433209	cg01169021	-0.0549069	0.729545	0.123991	0.314453
PCDHGB2	chr5_141433209	cg01224715	-0.0216822	0.995898	0.599662	0.770732
PCDHGB2	chr5_141433209	cg01311360	-0.0218171	-0.233179	0.524904	0.720593
PCDHGB2	chr5_141433209	cg01911239	-0.0262162	0.550447	0.291574	0.515506
PCDHGB2	chr5_141433209	cg02022733	-0.0825795	1.19331	0.061933	0.204599
PCDHGB2	chr5_141433209	cg02022808	-0.024142	0.155136	0.569253	0.751892
PCDHGB2	chr5_141433209	cg02056653	-0.0074568	0.0977109	0.803406	0.894073
PCDHGB2	chr5_141433209	cg02161292	-0.0423553	1.22818	0.266651	0.491464
PCDHGB2	chr5_141433209	cg02267483	-0.0353415	0.651996	0.265567	0.491464
PCDHGB2	chr5_141433209	cg02331883	-0.0381465	0.842474	0.380442	0.600271
PCDHGB2	chr5_141433209	cg02430347	-0.211873	1.58492	0.202678	0.422153
PCDHGB2	chr5_141433209	cg02452944	-0.0344895	0.445296	0.296024	0.519787
PCDHGB2	chr5_141433209	cg02575448	-0.0577002	0.787703	0.301788	0.525987
PCDHGB2	chr5_141433209	cg02580763	-0.0279312	0.698461	0.225618	0.450284
PCDHGB2	chr5_141433209	cg02707176	-0.0661056	1.11875	0.249047	0.47468
PCDHGB2	chr5_141433209	cg02722596	-0.11756	1.78204	0.0822482	0.246721
PCDHGB2	chr5_141433209	cg02780295	-0.106619	0.844721	0.0503275	0.178742
PCDHGB2	chr5_141433209	cg02867763	-0.0288353	0.374097	0.269455	0.494875
PCDHGB2	chr5_141433209	cg03086707	-0.0701667	1.16255	0.111642	0.29622
PCDHGB2	chr5_141433209	cg03415916	-0.0448692	1.26195	0.175281	0.38627
PCDHGB2	chr5_141433209	cg03486475	-0.0571884	1.04158	0.0956729	0.27095
PCDHGB2	chr5_141433209	cg03640756	-0.0574738	0.336947	0.139612	0.338771
PCDHGB2	chr5_141433209	cg03828328	-0.0268348	0.573867	0.30842	0.533174
PCDHGB2	chr5_141433209	cg03835609	-0.0467961	0.429386	0.388354	0.607512
PCDHGB2	chr5_141433209	cg03892308	-0.0337444	1.10943	0.288002	0.510998
PCDHGB2	chr5_141433209	cg03898577	0.0265345	-0.547402	0.571245	0.753292
PCDHGB2	chr5_141433209	cg03898832	0.00449775	1.15129	0.909339	0.951816
PCDHGB2	chr5_141433209	cg04080041	0.0222948	-0.338628	0.403327	0.619714
PCDHGB2	chr5_141433209	cg04117404	-0.0350626	0.649403	0.514604	0.713919
PCDHGB2	chr5_141433209	cg04160343	0.00712662	0.416741	0.858827	0.924877
PCDHGB2	chr5_141433209	cg04242499	-0.0642662	0.99014	0.0839405	0.248985
PCDHGB2	chr5_141433209	cg04246144	0.084513	-1.38649	0.0156417	0.0810406
PCDHGB2	chr5_141433209	cg04453180	-0.0496503	0.555901	0.323677	0.546855
PCDHGB2	chr5_141433209	cg04503600	-0.0253607	0.614062	0.460675	0.672974
PCDHGB2	chr5_141433209	cg04637478	-0.0236055	0.437672	0.471236	0.680848
PCDHGB2	chr5_141433209	cg04726784	-0.0387919	0.144292	0.23375	0.459247
PCDHGB2	chr5_141433209	cg04773864	-0.0638859	1.39486	0.0927348	0.265296
PCDHGB2	chr5_141433209	cg04964031	-0.0172776	0.246305	0.573558	0.754164
PCDHGB2	chr5_141433209	cg05043461	-0.0264497	0.382661	0.279114	0.502344
PCDHGB2	chr5_141433209	cg05149776	0.011221	0.402159	0.734194	0.850861
PCDHGB2	chr5_141433209	cg05197036	0.0730347	-0.0975403	0.0648105	0.211051
PCDHGB2	chr5_141433209	cg05494467	-0.0309666	0.517928	0.370826	0.591856
PCDHGB2	chr5_141433209	cg05670472	-0.0261941	0.309718	0.473565	0.682313
PCDHGB2	chr5_141433209	cg05870739	-0.0618802	0.523237	0.103383	0.283036
PCDHGB2	chr5_141433209	cg06065872	-0.0308484	1.58416	0.560073	0.745581
PCDHGB2	chr5_141433209	cg06428620	-0.0254137	0.405805	0.633473	0.791258
PCDHGB2	chr5_141433209	cg06572465	-0.0541584	0.579811	0.170727	0.381142
PCDHGB2	chr5_141433209	cg06575035	-0.0207056	0.745533	0.464089	0.675726
PCDHGB2	chr5_141433209	cg06757585	-0.0480914	0.971097	0.187065	0.40145
PCDHGB2	chr5_141433209	cg06776159	-0.0610177	1.63708	0.134706	0.331074
PCDHGB2	chr5_141433209	cg07017875	0.00745766	-0.0238189	0.722543	0.844534
PCDHGB2	chr5_141433209	cg07179872	-0.0435135	0.737072	0.231063	0.456819
PCDHGB2	chr5_141433209	cg07231479	-0.0377706	0.712059	0.138831	0.337734
PCDHGB2	chr5_141433209	cg07242860	0.0742844	-1.1052	0.0361709	0.145086
PCDHGB2	chr5_141433209	cg07445963	-0.0122834	0.0418168	0.638845	0.794719
PCDHGB2	chr5_141433209	cg07448606	-0.0654057	-0.082453	0.25655	0.481987
PCDHGB2	chr5_141433209	cg07489502	-0.0796497	1.39225	0.229666	0.455343
PCDHGB2	chr5_141433209	cg07520649	0.0155247	0.611641	0.673107	0.817506
PCDHGB2	chr5_141433209	cg07524997	-0.0289988	0.494463	0.649354	0.801255
PCDHGB2	chr5_141433209	cg07539798	-0.0154203	0.632429	0.639314	0.794719
PCDHGB2	chr5_141433209	cg07608474	0.00495237	1.60834	0.921752	0.958961
PCDHGB2	chr5_141433209	cg07613945	-0.0440035	0.818663	0.392906	0.611575
PCDHGB2	chr5_141433209	cg07620533	-0.0704527	0.84452	0.0377454	0.148747
PCDHGB2	chr5_141433209	cg07717903	-0.057705	1.386	0.112988	0.297469
PCDHGB2	chr5_141433209	cg07730329	-0.0427012	0.771273	0.239562	0.464785
PCDHGB2	chr5_141433209	cg07802710	-0.00946916	0.0828286	0.739644	0.853974
PCDHGB2	chr5_141433209	cg07804076	0.0132535	0.162105	0.584119	0.762333
PCDHGB2	chr5_141433209	cg07870307	-0.0931707	0.610328	0.0386036	0.150381
PCDHGB2	chr5_141433209	cg08155325	-0.00373397	0.504242	0.923772	0.959857
PCDHGB2	chr5_141433209	cg08292467	-0.0327339	0.751127	0.31287	0.536538
PCDHGB2	chr5_141433209	cg08395122	-0.0199376	0.325633	0.391367	0.610174
PCDHGB2	chr5_141433209	cg08616061	-0.0469657	0.698542	0.122036	0.311452
PCDHGB2	chr5_141433209	cg08935238	-0.00937258	0.356931	0.745806	0.856324
PCDHGB2	chr5_141433209	cg09066326	-0.0684397	1.05078	0.211666	0.433909
PCDHGB2	chr5_141433209	cg09484752	-0.00398891	0.70467	0.887681	0.940614
PCDHGB2	chr5_141433209	cg09570348	-0.0632485	1.2201	0.377377	0.59777
PCDHGB2	chr5_141433209	cg09581226	-0.0342298	0.843192	0.175554	0.38627
PCDHGB2	chr5_141433209	cg09639151	-0.0590042	0.762521	0.0657724	0.212471
PCDHGB2	chr5_141433209	cg10475970	-0.015479	0.280001	0.529446	0.723354
PCDHGB2	chr5_141433209	cg10679597	-0.0142473	0.40612	0.691842	0.826053
PCDHGB2	chr5_141433209	cg10858746	-0.117571	1.08735	0.147062	0.347865
PCDHGB2	chr5_141433209	cg10917547	-0.03072	0.3986	0.396471	0.613759
PCDHGB2	chr5_141433209	cg11014124	0.04912	0.297364	0.536902	0.728883
PCDHGB2	chr5_141433209	cg11086421	-0.0432143	0.450962	0.173257	0.384033
PCDHGB2	chr5_141433209	cg11210069	-0.10033	1.80227	0.0322338	0.133944
PCDHGB2	chr5_141433209	cg11499025	0.0682525	-0.920841	0.0240683	0.108998
PCDHGB2	chr5_141433209	cg11647681	-0.0357878	0.551828	0.234084	0.459247
PCDHGB2	chr5_141433209	cg11655243	-0.020476	0.961178	0.684729	0.822771
PCDHGB2	chr5_141433209	cg11830096	-0.145746	3.11222	0.0294711	0.125918
PCDHGB2	chr5_141433209	cg11907797	-0.0430222	0.787415	0.128442	0.321001
PCDHGB2	chr5_141433209	cg12145907	-0.044147	0.57772	0.196538	0.414218
PCDHGB2	chr5_141433209	cg12304520	-0.0379056	0.828302	0.475274	0.683136
PCDHGB2	chr5_141433209	cg12459904	-0.070246	1.08132	0.0538464	0.186879
PCDHGB2	chr5_141433209	cg12487540	-0.0165838	0.159663	0.557869	0.744818
PCDHGB2	chr5_141433209	cg12487901	0.0110663	-0.175186	0.681431	0.820875
PCDHGB2	chr5_141433209	cg12648074	-0.0486042	0.72121	0.11826	0.305528
PCDHGB2	chr5_141433209	cg12877039	-0.0171925	0.536889	0.614762	0.778703
PCDHGB2	chr5_141433209	cg13023584	-0.108983	2.39377	0.0757032	0.233252
PCDHGB2	chr5_141433209	cg13307880	-0.0214506	0.407763	0.515528	0.714266
PCDHGB2	chr5_141433209	cg13598256	-0.0101727	-0.0234512	0.787928	0.883684
PCDHGB2	chr5_141433209	cg13718539	-0.0335721	0.578869	0.279394	0.502344
PCDHGB2	chr5_141433209	cg13933262	-0.0896678	0.659149	0.178923	0.39033
PCDHGB2	chr5_141433209	cg13972793	-0.00714313	0.166983	0.701633	0.832322
PCDHGB2	chr5_141433209	cg13993336	-0.111461	0.803594	0.106956	0.289051
PCDHGB2	chr5_141433209	cg14253517	0.00417436	-0.00417787	0.878081	0.935539
PCDHGB2	chr5_141433209	cg14458068	-0.0601463	1.00225	0.13164	0.325828
PCDHGB2	chr5_141433209	cg14472390	-0.0290844	1.13099	0.347278	0.568973
PCDHGB2	chr5_141433209	cg14566959	-0.0204634	1.16357	0.599314	0.770732
PCDHGB2	chr5_141433209	cg14672084	-0.0482834	1.33372	0.595672	0.769465
PCDHGB2	chr5_141433209	cg14681511	-0.00885685	0.267703	0.839205	0.913677
PCDHGB2	chr5_141433209	cg14738170	-0.0129685	0.0227555	0.615943	0.779016
PCDHGB2	chr5_141433209	cg15004405	0.000809452	0.352956	0.970225	0.98533
PCDHGB2	chr5_141433209	cg15124968	-0.0885271	0.574615	0.0438587	0.16253
PCDHGB2	chr5_141433209	cg15361590	-0.0533607	0.615817	0.144363	0.344609
PCDHGB2	chr5_141433209	cg15672768	-0.0243046	0.52409	0.309275	0.533471
PCDHGB2	chr5_141433209	cg15829642	-0.114765	2.54138	0.072458	0.227068
PCDHGB2	chr5_141433209	cg15874877	-0.044702	1.32342	0.247484	0.47397
PCDHGB2	chr5_141433209	cg15949044	-0.0697219	0.763419	0.0905958	0.261704
PCDHGB2	chr5_141433209	cg15988320	0.0428184	-0.831279	0.110803	0.295269
PCDHGB2	chr5_141433209	cg16032518	-0.0105573	0.249569	0.704041	0.83292
PCDHGB2	chr5_141433209	cg16316394	-0.0220833	0.936132	0.628214	0.78768
PCDHGB2	chr5_141433209	cg16505764	-0.0373292	0.866022	0.274613	0.499219
PCDHGB2	chr5_141433209	cg17108383	-0.00985816	1.18435	0.833781	0.910528
PCDHGB2	chr5_141433209	cg17227466	-0.0914133	1.08902	0.259111	0.484801
PCDHGB2	chr5_141433209	cg17297238	-0.0267614	0.49318	0.435085	0.64789
PCDHGB2	chr5_141433209	cg17451176	-0.05343	0.548812	0.0653344	0.212028
PCDHGB2	chr5_141433209	cg17857974	-0.0130836	0.327144	0.802517	0.894057
PCDHGB2	chr5_141433209	cg17982031	-0.0140194	0.317354	0.681025	0.820875
PCDHGB2	chr5_141433209	cg18054674	-0.0540777	1.2724	0.159546	0.365123
PCDHGB2	chr5_141433209	cg18118262	-0.0676596	1.22047	0.535343	0.728211
PCDHGB2	chr5_141433209	cg18164784	-0.0764164	1.10076	0.0872395	0.254922
PCDHGB2	chr5_141433209	cg18507379	-0.0518329	0.602563	0.339275	0.561554
PCDHGB2	chr5_141433209	cg18617005	-0.061029	0.777743	0.246078	0.472835
PCDHGB2	chr5_141433209	cg18858331	-0.0142797	0.377071	0.523144	0.719825
PCDHGB2	chr5_141433209	cg18869485	0.00324769	0.419428	0.946923	0.972345
PCDHGB2	chr5_141433209	cg19037350	-4.65752e-05	0.162732	0.998695	0.999519
PCDHGB2	chr5_141433209	cg19247475	-0.0346261	0.84417	0.23548	0.460867
PCDHGB2	chr5_141433209	cg19748485	-0.0374557	0.667396	0.115127	0.300463
PCDHGB2	chr5_141433209	cg19754283	0.0396081	-0.161875	0.669472	0.81526
PCDHGB2	chr5_141433209	cg19814830	-0.0490756	2.08264	0.350942	0.572742
PCDHGB2	chr5_141433209	cg20433262	0.0125303	-0.205348	0.506277	0.707696
PCDHGB2	chr5_141433209	cg20938085	-0.0372975	0.925954	0.266185	0.491464
PCDHGB2	chr5_141433209	cg21101631	-0.0180069	0.293176	0.561614	0.746379
PCDHGB2	chr5_141433209	cg21117330	-0.00747229	0.54651	0.850621	0.92015
PCDHGB2	chr5_141433209	cg21157357	-0.0224891	1.038	0.600722	0.770868
PCDHGB2	chr5_141433209	cg21185686	-0.0314241	0.587985	0.369399	0.590859
PCDHGB2	chr5_141433209	cg21580428	-0.0576662	0.550702	0.0318017	0.132743
PCDHGB2	chr5_141433209	cg21627409	-0.0235031	0.136434	0.491127	0.696287
PCDHGB2	chr5_141433209	cg21752383	0.00540627	0.364216	0.895463	0.944572
PCDHGB2	chr5_141433209	cg21908557	-0.0382226	0.428474	0.218161	0.441822
PCDHGB2	chr5_141433209	cg22052948	-0.0470072	1.17129	0.269632	0.494875
PCDHGB2	chr5_141433209	cg22082176	0.0198633	-0.182076	0.384108	0.603786
PCDHGB2	chr5_141433209	cg22151446	-0.0370265	0.450577	0.25371	0.479997
PCDHGB2	chr5_141433209	cg22175873	-0.0325446	0.676289	0.27702	0.501112
PCDHGB2	chr5_141433209	cg22463553	-0.0120771	0.561979	0.730581	0.849527
PCDHGB2	chr5_141433209	cg22648135	-0.0677447	0.864624	0.0836028	0.248654
PCDHGB2	chr5_141433209	cg22692868	-0.0152484	0.604952	0.675197	0.817978
PCDHGB2	chr5_141433209	cg22737624	-0.0557674	0.907299	0.191386	0.407529
PCDHGB2	chr5_141433209	cg22847228	-0.0744901	0.585373	0.0372069	0.147766
PCDHGB2	chr5_141433209	cg22861116	-0.0962154	1.43212	0.0416813	0.15763
PCDHGB2	chr5_141433209	cg23082339	0.0192042	-0.553407	0.609438	0.775441
PCDHGB2	chr5_141433209	cg23244790	-0.0263297	0.299874	0.440699	0.653335
PCDHGB2	chr5_141433209	cg23347399	-0.0743897	1.18732	0.0697112	0.22118
PCDHGB2	chr5_141433209	cg23348764	-0.0338422	0.380867	0.335816	0.558559
PCDHGB2	chr5_141433209	cg23359276	-0.0915246	0.319637	0.179928	0.391465
PCDHGB2	chr5_141433209	cg23445461	-0.079579	0.816556	0.101515	0.280555
PCDHGB2	chr5_141433209	cg23930711	-0.0424355	0.337864	0.313621	0.536949
PCDHGB2	chr5_141433209	cg24024424	0.0094398	-0.0272302	0.691094	0.825884
PCDHGB2	chr5_141433209	cg24155123	0.0529002	-0.53278	0.130286	0.32362
PCDHGB2	chr5_141433209	cg24172509	-0.0226551	1.27873	0.746246	0.856324
PCDHGB2	chr5_141433209	cg24619378	-0.0236461	0.54521	0.394908	0.612693
PCDHGB2	chr5_141433209	cg24633027	-0.0680859	2.27202	0.114698	0.300065
PCDHGB2	chr5_141433209	cg24656271	-0.0810486	1.17635	0.0103186	0.0596626
PCDHGB2	chr5_141433209	cg24921961	-0.0460603	1.37473	0.140317	0.339413
PCDHGB2	chr5_141433209	cg24942747	-0.0206811	0.506915	0.368501	0.590388
PCDHGB2	chr5_141433209	cg24954895	-0.0466774	0.69077	0.143121	0.343644
PCDHGB2	chr5_141433209	cg24996161	-0.0885594	2.08006	0.158509	0.36385
PCDHGB2	chr5_141433209	cg25353450	-0.0604537	0.319463	0.2135	0.435627
PCDHGB2	chr5_141433209	cg25426815	-0.109173	1.40186	0.0773396	0.236042
PCDHGB2	chr5_141433209	cg25564433	-0.0744379	1.6727	0.0420062	0.158061
PCDHGB2	chr5_141433209	cg25600472	-0.0220835	0.794978	0.374552	0.595631
PCDHGB2	chr5_141433209	cg25949304	-0.029946	0.514842	0.514447	0.713919
PCDHGB2	chr5_141433209	cg26275431	-0.0510573	0.694331	0.0849772	0.250612
PCDHGB2	chr5_141433209	cg26337998	-0.0627058	0.582067	0.100382	0.279261
PCDHGB2	chr5_141433209	cg26811372	-0.0526635	0.806364	0.27333	0.498217
PCDHGB2	chr5_141433209	cg26826004	-0.0143216	-0.228826	0.553856	0.741734
PCDHGB2	chr5_141433209	cg26843711	-0.038297	0.90122	0.488267	0.693987
PCDHGB2	chr5_141433209	cg26856475	-0.0677946	1.27058	0.0807358	0.243656
PCDHGB2	chr5_141433209	cg26879386	-0.0652928	1.63457	0.029787	0.1267
PCDHGB2	chr5_141433209	cg26890354	0.00772894	-0.216475	0.818314	0.902353
PCDHGB2	chr5_141433209	cg26962778	-0.0265509	0.401551	0.209361	0.43112
PCDHGB2	chr5_141433209	cg27305357	-0.0215669	0.293116	0.277182	0.501112
PCDHGB2	chr5_141433209	cg27553119	-0.00333486	0.123751	0.880692	0.936329
PCDHGB2	chr5_141433209	cg27639030	0.0118429	-0.243041	0.604752	0.771808
PCDHGB2	chr5_141433209	cg27665767	-0.0102742	0.308401	0.651787	0.802577
PCDHGA5	chr5_141433209	cg00039176	-0.0260424	0.103737	0.601988	0.77108
PCDHGA5	chr5_141433209	cg00048743	-0.0448301	1.00045	0.553744	0.741734
PCDHGA5	chr5_141433209	cg00104845	-0.0341455	0.391128	0.394556	0.612693
PCDHGA5	chr5_141433209	cg00281842	-0.0839925	0.597975	0.352274	0.573319
PCDHGA5	chr5_141433209	cg00283283	0.0377575	-0.543301	0.204775	0.423754
PCDHGA5	chr5_141433209	cg00589850	0.00967097	0.0381797	0.731304	0.849575
PCDHGA5	chr5_141433209	cg00633552	-0.0346093	0.945072	0.302729	0.526337
PCDHGA5	chr5_141433209	cg00758915	0.0256061	-0.134887	0.602868	0.771128
PCDHGA5	chr5_141433209	cg00808170	-0.00874676	0.475213	0.699169	0.831372
PCDHGA5	chr5_141433209	cg00888801	-0.0147921	0.951409	0.656831	0.806169
PCDHGA5	chr5_141433209	cg00943245	-0.00257988	0.424716	0.944678	0.971695
PCDHGA5	chr5_141433209	cg01000954	0.00192425	2.36544	0.977347	0.989406
PCDHGA5	chr5_141433209	cg01169021	-0.0549069	0.729545	0.123991	0.314453
PCDHGA5	chr5_141433209	cg01224715	-0.0216822	0.995898	0.599662	0.770732
PCDHGA5	chr5_141433209	cg01311360	-0.0218171	-0.233179	0.524904	0.720593
PCDHGA5	chr5_141433209	cg01911239	-0.0262162	0.550447	0.291574	0.515506
PCDHGA5	chr5_141433209	cg02022733	-0.0825795	1.19331	0.061933	0.204599
PCDHGA5	chr5_141433209	cg02022808	-0.024142	0.155136	0.569253	0.751892
PCDHGA5	chr5_141433209	cg02056653	-0.0074568	0.0977109	0.803406	0.894073
PCDHGA5	chr5_141433209	cg02161292	-0.0423553	1.22818	0.266651	0.491464
PCDHGA5	chr5_141433209	cg02267483	-0.0353415	0.651996	0.265567	0.491464
PCDHGA5	chr5_141433209	cg02331883	-0.0381465	0.842474	0.380442	0.600271
PCDHGA5	chr5_141433209	cg02430347	-0.211873	1.58492	0.202678	0.422153
PCDHGA5	chr5_141433209	cg02452944	-0.0344895	0.445296	0.296024	0.519787
PCDHGA5	chr5_141433209	cg02575448	-0.0577002	0.787703	0.301788	0.525987
PCDHGA5	chr5_141433209	cg02580763	-0.0279312	0.698461	0.225618	0.450284
PCDHGA5	chr5_141433209	cg02707176	-0.0661056	1.11875	0.249047	0.47468
PCDHGA5	chr5_141433209	cg02722596	-0.11756	1.78204	0.0822482	0.246721
PCDHGA5	chr5_141433209	cg02780295	-0.106619	0.844721	0.0503275	0.178742
PCDHGA5	chr5_141433209	cg03086707	-0.0701667	1.16255	0.111642	0.29622
PCDHGA5	chr5_141433209	cg03415916	-0.0448692	1.26195	0.175281	0.38627
PCDHGA5	chr5_141433209	cg03486475	-0.0571884	1.04158	0.0956729	0.27095
PCDHGA5	chr5_141433209	cg03640756	-0.0574738	0.336947	0.139612	0.338771
PCDHGA5	chr5_141433209	cg03828328	-0.0268348	0.573867	0.30842	0.533174
PCDHGA5	chr5_141433209	cg03835609	-0.0467961	0.429386	0.388354	0.607512
PCDHGA5	chr5_141433209	cg03892308	-0.0337444	1.10943	0.288002	0.510998
PCDHGA5	chr5_141433209	cg03898577	0.0265345	-0.547402	0.571245	0.753292
PCDHGA5	chr5_141433209	cg03898832	0.00449775	1.15129	0.909339	0.951816
PCDHGA5	chr5_141433209	cg04080041	0.0222948	-0.338628	0.403327	0.619714
PCDHGA5	chr5_141433209	cg04117404	-0.0350626	0.649403	0.514604	0.713919
PCDHGA5	chr5_141433209	cg04160343	0.00712662	0.416741	0.858827	0.924877
PCDHGA5	chr5_141433209	cg04242499	-0.0642662	0.99014	0.0839405	0.248985
PCDHGA5	chr5_141433209	cg04246144	0.084513	-1.38649	0.0156417	0.0810406
PCDHGA5	chr5_141433209	cg04453180	-0.0496503	0.555901	0.323677	0.546855
PCDHGA5	chr5_141433209	cg04503600	-0.0253607	0.614062	0.460675	0.672974
PCDHGA5	chr5_141433209	cg04637478	-0.0236055	0.437672	0.471236	0.680848
PCDHGA5	chr5_141433209	cg04726784	-0.0387919	0.144292	0.23375	0.459247
PCDHGA5	chr5_141433209	cg04773864	-0.0638859	1.39486	0.0927348	0.265296
PCDHGA5	chr5_141433209	cg04964031	-0.0172776	0.246305	0.573558	0.754164
PCDHGA5	chr5_141433209	cg05149776	0.011221	0.402159	0.734194	0.850861
PCDHGA5	chr5_141433209	cg05197036	0.0730347	-0.0975403	0.0648105	0.211051
PCDHGA5	chr5_141433209	cg05494467	-0.0309666	0.517928	0.370826	0.591856
PCDHGA5	chr5_141433209	cg05670472	-0.0261941	0.309718	0.473565	0.682313
PCDHGA5	chr5_141433209	cg05870739	-0.0618802	0.523237	0.103383	0.283036
PCDHGA5	chr5_141433209	cg06065872	-0.0308484	1.58416	0.560073	0.745581
PCDHGA5	chr5_141433209	cg06428620	-0.0254137	0.405805	0.633473	0.791258
PCDHGA5	chr5_141433209	cg06572465	-0.0541584	0.579811	0.170727	0.381142
PCDHGA5	chr5_141433209	cg06575035	-0.0207056	0.745533	0.464089	0.675726
PCDHGA5	chr5_141433209	cg06757585	-0.0480914	0.971097	0.187065	0.40145
PCDHGA5	chr5_141433209	cg06776159	-0.0610177	1.63708	0.134706	0.331074
PCDHGA5	chr5_141433209	cg07017875	0.00745766	-0.0238189	0.722543	0.844534
PCDHGA5	chr5_141433209	cg07179872	-0.0435135	0.737072	0.231063	0.456819
PCDHGA5	chr5_141433209	cg07231479	-0.0377706	0.712059	0.138831	0.337734
PCDHGA5	chr5_141433209	cg07242860	0.0742844	-1.1052	0.0361709	0.145086
PCDHGA5	chr5_141433209	cg07445963	-0.0122834	0.0418168	0.638845	0.794719
PCDHGA5	chr5_141433209	cg07448606	-0.0654057	-0.082453	0.25655	0.481987
PCDHGA5	chr5_141433209	cg07489502	-0.0796497	1.39225	0.229666	0.455343
PCDHGA5	chr5_141433209	cg07520649	0.0155247	0.611641	0.673107	0.817506
PCDHGA5	chr5_141433209	cg07524997	-0.0289988	0.494463	0.649354	0.801255
PCDHGA5	chr5_141433209	cg07539798	-0.0154203	0.632429	0.639314	0.794719
PCDHGA5	chr5_141433209	cg07608474	0.00495237	1.60834	0.921752	0.958961
PCDHGA5	chr5_141433209	cg07613945	-0.0440035	0.818663	0.392906	0.611575
PCDHGA5	chr5_141433209	cg07620533	-0.0704527	0.84452	0.0377454	0.148747
PCDHGA5	chr5_141433209	cg07717903	-0.057705	1.386	0.112988	0.297469
PCDHGA5	chr5_141433209	cg07730329	-0.0427012	0.771273	0.239562	0.464785
PCDHGA5	chr5_141433209	cg07802710	-0.00946916	0.0828286	0.739644	0.853974
PCDHGA5	chr5_141433209	cg07804076	0.0132535	0.162105	0.584119	0.762333
PCDHGA5	chr5_141433209	cg07870307	-0.0931707	0.610328	0.0386036	0.150381
PCDHGA5	chr5_141433209	cg08155325	-0.00373397	0.504242	0.923772	0.959857
PCDHGA5	chr5_141433209	cg08292467	-0.0327339	0.751127	0.31287	0.536538
PCDHGA5	chr5_141433209	cg08395122	-0.0199376	0.325633	0.391367	0.610174
PCDHGA5	chr5_141433209	cg08616061	-0.0469657	0.698542	0.122036	0.311452
PCDHGA5	chr5_141433209	cg08935238	-0.00937258	0.356931	0.745806	0.856324
PCDHGA5	chr5_141433209	cg09066326	-0.0684397	1.05078	0.211666	0.433909
PCDHGA5	chr5_141433209	cg09484752	-0.00398891	0.70467	0.887681	0.940614
PCDHGA5	chr5_141433209	cg09570348	-0.0632485	1.2201	0.377377	0.59777
PCDHGA5	chr5_141433209	cg09581226	-0.0342298	0.843192	0.175554	0.38627
PCDHGA5	chr5_141433209	cg09639151	-0.0590042	0.762521	0.0657724	0.212471
PCDHGA5	chr5_141433209	cg10475970	-0.015479	0.280001	0.529446	0.723354
PCDHGA5	chr5_141433209	cg10679597	-0.0142473	0.40612	0.691842	0.826053
PCDHGA5	chr5_141433209	cg10858746	-0.117571	1.08735	0.147062	0.347865
PCDHGA5	chr5_141433209	cg10917547	-0.03072	0.3986	0.396471	0.613759
PCDHGA5	chr5_141433209	cg11014124	0.04912	0.297364	0.536902	0.728883
PCDHGA5	chr5_141433209	cg11086421	-0.0432143	0.450962	0.173257	0.384033
PCDHGA5	chr5_141433209	cg11210069	-0.10033	1.80227	0.0322338	0.133944
PCDHGA5	chr5_141433209	cg11499025	0.0682525	-0.920841	0.0240683	0.108998
PCDHGA5	chr5_141433209	cg11647681	-0.0357878	0.551828	0.234084	0.459247
PCDHGA5	chr5_141433209	cg11655243	-0.020476	0.961178	0.684729	0.822771
PCDHGA5	chr5_141433209	cg11830096	-0.145746	3.11222	0.0294711	0.125918
PCDHGA5	chr5_141433209	cg11907797	-0.0430222	0.787415	0.128442	0.321001
PCDHGA5	chr5_141433209	cg12145907	-0.044147	0.57772	0.196538	0.414218
PCDHGA5	chr5_141433209	cg12304520	-0.0379056	0.828302	0.475274	0.683136
PCDHGA5	chr5_141433209	cg12459904	-0.070246	1.08132	0.0538464	0.186879
PCDHGA5	chr5_141433209	cg12487901	0.0110663	-0.175186	0.681431	0.820875
PCDHGA5	chr5_141433209	cg12648074	-0.0486042	0.72121	0.11826	0.305528
PCDHGA5	chr5_141433209	cg12877039	-0.0171925	0.536889	0.614762	0.778703
PCDHGA5	chr5_141433209	cg13023584	-0.108983	2.39377	0.0757032	0.233252
PCDHGA5	chr5_141433209	cg13307880	-0.0214506	0.407763	0.515528	0.714266
PCDHGA5	chr5_141433209	cg13598256	-0.0101727	-0.0234512	0.787928	0.883684
PCDHGA5	chr5_141433209	cg13718539	-0.0335721	0.578869	0.279394	0.502344
PCDHGA5	chr5_141433209	cg13933262	-0.0896678	0.659149	0.178923	0.39033
PCDHGA5	chr5_141433209	cg13972793	-0.00714313	0.166983	0.701633	0.832322
PCDHGA5	chr5_141433209	cg13993336	-0.111461	0.803594	0.106956	0.289051
PCDHGA5	chr5_141433209	cg14253517	0.00417436	-0.00417787	0.878081	0.935539
PCDHGA5	chr5_141433209	cg14458068	-0.0601463	1.00225	0.13164	0.325828
PCDHGA5	chr5_141433209	cg14472390	-0.0290844	1.13099	0.347278	0.568973
PCDHGA5	chr5_141433209	cg14566959	-0.0204634	1.16357	0.599314	0.770732
PCDHGA5	chr5_141433209	cg14672084	-0.0482834	1.33372	0.595672	0.769465
PCDHGA5	chr5_141433209	cg14681511	-0.00885685	0.267703	0.839205	0.913677
PCDHGA5	chr5_141433209	cg14738170	-0.0129685	0.0227555	0.615943	0.779016
PCDHGA5	chr5_141433209	cg15004405	0.000809452	0.352956	0.970225	0.98533
PCDHGA5	chr5_141433209	cg15124968	-0.0885271	0.574615	0.0438587	0.16253
PCDHGA5	chr5_141433209	cg15361590	-0.0533607	0.615817	0.144363	0.344609
PCDHGA5	chr5_141433209	cg15672768	-0.0243046	0.52409	0.309275	0.533471
PCDHGA5	chr5_141433209	cg15829642	-0.114765	2.54138	0.072458	0.227068
PCDHGA5	chr5_141433209	cg15874877	-0.044702	1.32342	0.247484	0.47397
PCDHGA5	chr5_141433209	cg15949044	-0.0697219	0.763419	0.0905958	0.261704
PCDHGA5	chr5_141433209	cg15988320	0.0428184	-0.831279	0.110803	0.295269
PCDHGA5	chr5_141433209	cg16032518	-0.0105573	0.249569	0.704041	0.83292
PCDHGA5	chr5_141433209	cg16316394	-0.0220833	0.936132	0.628214	0.78768
PCDHGA5	chr5_141433209	cg16505764	-0.0373292	0.866022	0.274613	0.499219
PCDHGA5	chr5_141433209	cg17108383	-0.00985816	1.18435	0.833781	0.910528
PCDHGA5	chr5_141433209	cg17227466	-0.0914133	1.08902	0.259111	0.484801
PCDHGA5	chr5_141433209	cg17297238	-0.0267614	0.49318	0.435085	0.64789
PCDHGA5	chr5_141433209	cg17451176	-0.05343	0.548812	0.0653344	0.212028
PCDHGA5	chr5_141433209	cg17857974	-0.0130836	0.327144	0.802517	0.894057
PCDHGA5	chr5_141433209	cg17982031	-0.0140194	0.317354	0.681025	0.820875
PCDHGA5	chr5_141433209	cg18054674	-0.0540777	1.2724	0.159546	0.365123
PCDHGA5	chr5_141433209	cg18118262	-0.0676596	1.22047	0.535343	0.728211
PCDHGA5	chr5_141433209	cg18164784	-0.0764164	1.10076	0.0872395	0.254922
PCDHGA5	chr5_141433209	cg18507379	-0.0518329	0.602563	0.339275	0.561554
PCDHGA5	chr5_141433209	cg18617005	-0.061029	0.777743	0.246078	0.472835
PCDHGA5	chr5_141433209	cg18858331	-0.0142797	0.377071	0.523144	0.719825
PCDHGA5	chr5_141433209	cg18869485	0.00324769	0.419428	0.946923	0.972345
PCDHGA5	chr5_141433209	cg19247475	-0.0346261	0.84417	0.23548	0.460867
PCDHGA5	chr5_141433209	cg19748485	-0.0374557	0.667396	0.115127	0.300463
PCDHGA5	chr5_141433209	cg19754283	0.0396081	-0.161875	0.669472	0.81526
PCDHGA5	chr5_141433209	cg20938085	-0.0372975	0.925954	0.266185	0.491464
PCDHGA5	chr5_141433209	cg21101631	-0.0180069	0.293176	0.561614	0.746379
PCDHGA5	chr5_141433209	cg21117330	-0.00747229	0.54651	0.850621	0.92015
PCDHGA5	chr5_141433209	cg21157357	-0.0224891	1.038	0.600722	0.770868
PCDHGA5	chr5_141433209	cg21185686	-0.0314241	0.587985	0.369399	0.590859
PCDHGA5	chr5_141433209	cg21580428	-0.0576662	0.550702	0.0318017	0.132743
PCDHGA5	chr5_141433209	cg21627409	-0.0235031	0.136434	0.491127	0.696287
PCDHGA5	chr5_141433209	cg21752383	0.00540627	0.364216	0.895463	0.944572
PCDHGA5	chr5_141433209	cg21908557	-0.0382226	0.428474	0.218161	0.441822
PCDHGA5	chr5_141433209	cg22052948	-0.0470072	1.17129	0.269632	0.494875
PCDHGA5	chr5_141433209	cg22082176	0.0198633	-0.182076	0.384108	0.603786
PCDHGA5	chr5_141433209	cg22151446	-0.0370265	0.450577	0.25371	0.479997
PCDHGA5	chr5_141433209	cg22175873	-0.0325446	0.676289	0.27702	0.501112
PCDHGA5	chr5_141433209	cg22463553	-0.0120771	0.561979	0.730581	0.849527
PCDHGA5	chr5_141433209	cg22648135	-0.0677447	0.864624	0.0836028	0.248654
PCDHGA5	chr5_141433209	cg22692868	-0.0152484	0.604952	0.675197	0.817978
PCDHGA5	chr5_141433209	cg22737624	-0.0557674	0.907299	0.191386	0.407529
PCDHGA5	chr5_141433209	cg22847228	-0.0744901	0.585373	0.0372069	0.147766
PCDHGA5	chr5_141433209	cg22861116	-0.0962154	1.43212	0.0416813	0.15763
PCDHGA5	chr5_141433209	cg23082339	0.0192042	-0.553407	0.609438	0.775441
PCDHGA5	chr5_141433209	cg23244790	-0.0263297	0.299874	0.440699	0.653335
PCDHGA5	chr5_141433209	cg23347399	-0.0743897	1.18732	0.0697112	0.22118
PCDHGA5	chr5_141433209	cg23348764	-0.0338422	0.380867	0.335816	0.558559
PCDHGA5	chr5_141433209	cg23359276	-0.0915246	0.319637	0.179928	0.391465
PCDHGA5	chr5_141433209	cg23445461	-0.079579	0.816556	0.101515	0.280555
PCDHGA5	chr5_141433209	cg24024424	0.0094398	-0.0272302	0.691094	0.825884
PCDHGA5	chr5_141433209	cg24155123	0.0529002	-0.53278	0.130286	0.32362
PCDHGA5	chr5_141433209	cg24172509	-0.0226551	1.27873	0.746246	0.856324
PCDHGA5	chr5_141433209	cg24619378	-0.0236461	0.54521	0.394908	0.612693
PCDHGA5	chr5_141433209	cg24633027	-0.0680859	2.27202	0.114698	0.300065
PCDHGA5	chr5_141433209	cg24656271	-0.0810486	1.17635	0.0103186	0.0596626
PCDHGA5	chr5_141433209	cg24921961	-0.0460603	1.37473	0.140317	0.339413
PCDHGA5	chr5_141433209	cg24942747	-0.0206811	0.506915	0.368501	0.590388
PCDHGA5	chr5_141433209	cg24954895	-0.0466774	0.69077	0.143121	0.343644
PCDHGA5	chr5_141433209	cg25353450	-0.0604537	0.319463	0.2135	0.435627
PCDHGA5	chr5_141433209	cg25426815	-0.109173	1.40186	0.0773396	0.236042
PCDHGA5	chr5_141433209	cg25564433	-0.0744379	1.6727	0.0420062	0.158061
PCDHGA5	chr5_141433209	cg25600472	-0.0220835	0.794978	0.374552	0.595631
PCDHGA5	chr5_141433209	cg25949304	-0.029946	0.514842	0.514447	0.713919
PCDHGA5	chr5_141433209	cg26275431	-0.0510573	0.694331	0.0849772	0.250612
PCDHGA5	chr5_141433209	cg26337998	-0.0627058	0.582067	0.100382	0.279261
PCDHGA5	chr5_141433209	cg26811372	-0.0526635	0.806364	0.27333	0.498217
PCDHGA5	chr5_141433209	cg26826004	-0.0143216	-0.228826	0.553856	0.741734
PCDHGA5	chr5_141433209	cg26843711	-0.038297	0.90122	0.488267	0.693987
PCDHGA5	chr5_141433209	cg26856475	-0.0677946	1.27058	0.0807358	0.243656
PCDHGA5	chr5_141433209	cg26879386	-0.0652928	1.63457	0.029787	0.1267
PCDHGA5	chr5_141433209	cg26890354	0.00772894	-0.216475	0.818314	0.902353
PCDHGA5	chr5_141433209	cg26962778	-0.0265509	0.401551	0.209361	0.43112
PCDHGA5	chr5_141433209	cg27305357	-0.0215669	0.293116	0.277182	0.501112
PCDHGA5	chr5_141433209	cg27553119	-0.00333486	0.123751	0.880692	0.936329
PCDHGA5	chr5_141433209	cg27639030	0.0118429	-0.243041	0.604752	0.771808
PCDHGA5	chr5_141433209	cg27665767	-0.0102742	0.308401	0.651787	0.802577
PCDHGB3	chr5_141433209	cg00039176	-0.0260424	0.103737	0.601988	0.77108
PCDHGB3	chr5_141433209	cg00048743	-0.0448301	1.00045	0.553744	0.741734
PCDHGB3	chr5_141433209	cg00104845	-0.0341455	0.391128	0.394556	0.612693
PCDHGB3	chr5_141433209	cg00281842	-0.0839925	0.597975	0.352274	0.573319
PCDHGB3	chr5_141433209	cg00283283	0.0377575	-0.543301	0.204775	0.423754
PCDHGB3	chr5_141433209	cg00589850	0.00967097	0.0381797	0.731304	0.849575
PCDHGB3	chr5_141433209	cg00758915	0.0256061	-0.134887	0.602868	0.771128
PCDHGB3	chr5_141433209	cg00808170	-0.00874676	0.475213	0.699169	0.831372
PCDHGB3	chr5_141433209	cg00888801	-0.0147921	0.951409	0.656831	0.806169
PCDHGB3	chr5_141433209	cg00943245	-0.00257988	0.424716	0.944678	0.971695
PCDHGB3	chr5_141433209	cg01000954	0.00192425	2.36544	0.977347	0.989406
PCDHGB3	chr5_141433209	cg01169021	-0.0549069	0.729545	0.123991	0.314453
PCDHGB3	chr5_141433209	cg01224715	-0.0216822	0.995898	0.599662	0.770732
PCDHGB3	chr5_141433209	cg01311360	-0.0218171	-0.233179	0.524904	0.720593
PCDHGB3	chr5_141433209	cg02022733	-0.0825795	1.19331	0.061933	0.204599
PCDHGB3	chr5_141433209	cg02022808	-0.024142	0.155136	0.569253	0.751892
PCDHGB3	chr5_141433209	cg02056653	-0.0074568	0.0977109	0.803406	0.894073
PCDHGB3	chr5_141433209	cg02161292	-0.0423553	1.22818	0.266651	0.491464
PCDHGB3	chr5_141433209	cg02267483	-0.0353415	0.651996	0.265567	0.491464
PCDHGB3	chr5_141433209	cg02331883	-0.0381465	0.842474	0.380442	0.600271
PCDHGB3	chr5_141433209	cg02430347	-0.211873	1.58492	0.202678	0.422153
PCDHGB3	chr5_141433209	cg02452944	-0.0344895	0.445296	0.296024	0.519787
PCDHGB3	chr5_141433209	cg02575448	-0.0577002	0.787703	0.301788	0.525987
PCDHGB3	chr5_141433209	cg02580763	-0.0279312	0.698461	0.225618	0.450284
PCDHGB3	chr5_141433209	cg02707176	-0.0661056	1.11875	0.249047	0.47468
PCDHGB3	chr5_141433209	cg02722596	-0.11756	1.78204	0.0822482	0.246721
PCDHGB3	chr5_141433209	cg02780295	-0.106619	0.844721	0.0503275	0.178742
PCDHGB3	chr5_141433209	cg03415916	-0.0448692	1.26195	0.175281	0.38627
PCDHGB3	chr5_141433209	cg03486475	-0.0571884	1.04158	0.0956729	0.27095
PCDHGB3	chr5_141433209	cg03640756	-0.0574738	0.336947	0.139612	0.338771
PCDHGB3	chr5_141433209	cg03835609	-0.0467961	0.429386	0.388354	0.607512
PCDHGB3	chr5_141433209	cg03892308	-0.0337444	1.10943	0.288002	0.510998
PCDHGB3	chr5_141433209	cg03898577	0.0265345	-0.547402	0.571245	0.753292
PCDHGB3	chr5_141433209	cg03898832	0.00449775	1.15129	0.909339	0.951816
PCDHGB3	chr5_141433209	cg04080041	0.0222948	-0.338628	0.403327	0.619714
PCDHGB3	chr5_141433209	cg04117404	-0.0350626	0.649403	0.514604	0.713919
PCDHGB3	chr5_141433209	cg04160343	0.00712662	0.416741	0.858827	0.924877
PCDHGB3	chr5_141433209	cg04242499	-0.0642662	0.99014	0.0839405	0.248985
PCDHGB3	chr5_141433209	cg04453180	-0.0496503	0.555901	0.323677	0.546855
PCDHGB3	chr5_141433209	cg04503600	-0.0253607	0.614062	0.460675	0.672974
PCDHGB3	chr5_141433209	cg04637478	-0.0236055	0.437672	0.471236	0.680848
PCDHGB3	chr5_141433209	cg04726784	-0.0387919	0.144292	0.23375	0.459247
PCDHGB3	chr5_141433209	cg04964031	-0.0172776	0.246305	0.573558	0.754164
PCDHGB3	chr5_141433209	cg05149776	0.011221	0.402159	0.734194	0.850861
PCDHGB3	chr5_141433209	cg05197036	0.0730347	-0.0975403	0.0648105	0.211051
PCDHGB3	chr5_141433209	cg05494467	-0.0309666	0.517928	0.370826	0.591856
PCDHGB3	chr5_141433209	cg05670472	-0.0261941	0.309718	0.473565	0.682313
PCDHGB3	chr5_141433209	cg05870739	-0.0618802	0.523237	0.103383	0.283036
PCDHGB3	chr5_141433209	cg06065872	-0.0308484	1.58416	0.560073	0.745581
PCDHGB3	chr5_141433209	cg06428620	-0.0254137	0.405805	0.633473	0.791258
PCDHGB3	chr5_141433209	cg06572465	-0.0541584	0.579811	0.170727	0.381142
PCDHGB3	chr5_141433209	cg06757585	-0.0480914	0.971097	0.187065	0.40145
PCDHGB3	chr5_141433209	cg06776159	-0.0610177	1.63708	0.134706	0.331074
PCDHGB3	chr5_141433209	cg07017875	0.00745766	-0.0238189	0.722543	0.844534
PCDHGB3	chr5_141433209	cg07179872	-0.0435135	0.737072	0.231063	0.456819
PCDHGB3	chr5_141433209	cg07231479	-0.0377706	0.712059	0.138831	0.337734
PCDHGB3	chr5_141433209	cg07445963	-0.0122834	0.0418168	0.638845	0.794719
PCDHGB3	chr5_141433209	cg07448606	-0.0654057	-0.082453	0.25655	0.481987
PCDHGB3	chr5_141433209	cg07489502	-0.0796497	1.39225	0.229666	0.455343
PCDHGB3	chr5_141433209	cg07524997	-0.0289988	0.494463	0.649354	0.801255
PCDHGB3	chr5_141433209	cg07539798	-0.0154203	0.632429	0.639314	0.794719
PCDHGB3	chr5_141433209	cg07608474	0.00495237	1.60834	0.921752	0.958961
PCDHGB3	chr5_141433209	cg07613945	-0.0440035	0.818663	0.392906	0.611575
PCDHGB3	chr5_141433209	cg07620533	-0.0704527	0.84452	0.0377454	0.148747
PCDHGB3	chr5_141433209	cg07717903	-0.057705	1.386	0.112988	0.297469
PCDHGB3	chr5_141433209	cg07730329	-0.0427012	0.771273	0.239562	0.464785
PCDHGB3	chr5_141433209	cg07802710	-0.00946916	0.0828286	0.739644	0.853974
PCDHGB3	chr5_141433209	cg08155325	-0.00373397	0.504242	0.923772	0.959857
PCDHGB3	chr5_141433209	cg08292467	-0.0327339	0.751127	0.31287	0.536538
PCDHGB3	chr5_141433209	cg08395122	-0.0199376	0.325633	0.391367	0.610174
PCDHGB3	chr5_141433209	cg08616061	-0.0469657	0.698542	0.122036	0.311452
PCDHGB3	chr5_141433209	cg08935238	-0.00937258	0.356931	0.745806	0.856324
PCDHGB3	chr5_141433209	cg09066326	-0.0684397	1.05078	0.211666	0.433909
PCDHGB3	chr5_141433209	cg09484752	-0.00398891	0.70467	0.887681	0.940614
PCDHGB3	chr5_141433209	cg09570348	-0.0632485	1.2201	0.377377	0.59777
PCDHGB3	chr5_141433209	cg09581226	-0.0342298	0.843192	0.175554	0.38627
PCDHGB3	chr5_141433209	cg09639151	-0.0590042	0.762521	0.0657724	0.212471
PCDHGB3	chr5_141433209	cg10475970	-0.015479	0.280001	0.529446	0.723354
PCDHGB3	chr5_141433209	cg10679597	-0.0142473	0.40612	0.691842	0.826053
PCDHGB3	chr5_141433209	cg10858746	-0.117571	1.08735	0.147062	0.347865
PCDHGB3	chr5_141433209	cg10917547	-0.03072	0.3986	0.396471	0.613759
PCDHGB3	chr5_141433209	cg11014124	0.04912	0.297364	0.536902	0.728883
PCDHGB3	chr5_141433209	cg11086421	-0.0432143	0.450962	0.173257	0.384033
PCDHGB3	chr5_141433209	cg11210069	-0.10033	1.80227	0.0322338	0.133944
PCDHGB3	chr5_141433209	cg11647681	-0.0357878	0.551828	0.234084	0.459247
PCDHGB3	chr5_141433209	cg11655243	-0.020476	0.961178	0.684729	0.822771
PCDHGB3	chr5_141433209	cg11830096	-0.145746	3.11222	0.0294711	0.125918
PCDHGB3	chr5_141433209	cg11907797	-0.0430222	0.787415	0.128442	0.321001
PCDHGB3	chr5_141433209	cg12145907	-0.044147	0.57772	0.196538	0.414218
PCDHGB3	chr5_141433209	cg12304520	-0.0379056	0.828302	0.475274	0.683136
PCDHGB3	chr5_141433209	cg12459904	-0.070246	1.08132	0.0538464	0.186879
PCDHGB3	chr5_141433209	cg12487901	0.0110663	-0.175186	0.681431	0.820875
PCDHGB3	chr5_141433209	cg12648074	-0.0486042	0.72121	0.11826	0.305528
PCDHGB3	chr5_141433209	cg12877039	-0.0171925	0.536889	0.614762	0.778703
PCDHGB3	chr5_141433209	cg13023584	-0.108983	2.39377	0.0757032	0.233252
PCDHGB3	chr5_141433209	cg13598256	-0.0101727	-0.0234512	0.787928	0.883684
PCDHGB3	chr5_141433209	cg13718539	-0.0335721	0.578869	0.279394	0.502344
PCDHGB3	chr5_141433209	cg13933262	-0.0896678	0.659149	0.178923	0.39033
PCDHGB3	chr5_141433209	cg13972793	-0.00714313	0.166983	0.701633	0.832322
PCDHGB3	chr5_141433209	cg13993336	-0.111461	0.803594	0.106956	0.289051
PCDHGB3	chr5_141433209	cg14253517	0.00417436	-0.00417787	0.878081	0.935539
PCDHGB3	chr5_141433209	cg14458068	-0.0601463	1.00225	0.13164	0.325828
PCDHGB3	chr5_141433209	cg14566959	-0.0204634	1.16357	0.599314	0.770732
PCDHGB3	chr5_141433209	cg14672084	-0.0482834	1.33372	0.595672	0.769465
PCDHGB3	chr5_141433209	cg14681511	-0.00885685	0.267703	0.839205	0.913677
PCDHGB3	chr5_141433209	cg15004405	0.000809452	0.352956	0.970225	0.98533
PCDHGB3	chr5_141433209	cg15124968	-0.0885271	0.574615	0.0438587	0.16253
PCDHGB3	chr5_141433209	cg15361590	-0.0533607	0.615817	0.144363	0.344609
PCDHGB3	chr5_141433209	cg15829642	-0.114765	2.54138	0.072458	0.227068
PCDHGB3	chr5_141433209	cg15874877	-0.044702	1.32342	0.247484	0.47397
PCDHGB3	chr5_141433209	cg15949044	-0.0697219	0.763419	0.0905958	0.261704
PCDHGB3	chr5_141433209	cg15988320	0.0428184	-0.831279	0.110803	0.295269
PCDHGB3	chr5_141433209	cg16032518	-0.0105573	0.249569	0.704041	0.83292
PCDHGB3	chr5_141433209	cg16316394	-0.0220833	0.936132	0.628214	0.78768
PCDHGB3	chr5_141433209	cg16505764	-0.0373292	0.866022	0.274613	0.499219
PCDHGB3	chr5_141433209	cg17108383	-0.00985816	1.18435	0.833781	0.910528
PCDHGB3	chr5_141433209	cg17227466	-0.0914133	1.08902	0.259111	0.484801
PCDHGB3	chr5_141433209	cg17297238	-0.0267614	0.49318	0.435085	0.64789
PCDHGB3	chr5_141433209	cg17857974	-0.0130836	0.327144	0.802517	0.894057
PCDHGB3	chr5_141433209	cg17982031	-0.0140194	0.317354	0.681025	0.820875
PCDHGB3	chr5_141433209	cg18054674	-0.0540777	1.2724	0.159546	0.365123
PCDHGB3	chr5_141433209	cg18118262	-0.0676596	1.22047	0.535343	0.728211
PCDHGB3	chr5_141433209	cg18164784	-0.0764164	1.10076	0.0872395	0.254922
PCDHGB3	chr5_141433209	cg18507379	-0.0518329	0.602563	0.339275	0.561554
PCDHGB3	chr5_141433209	cg18617005	-0.061029	0.777743	0.246078	0.472835
PCDHGB3	chr5_141433209	cg18858331	-0.0142797	0.377071	0.523144	0.719825
PCDHGB3	chr5_141433209	cg18869485	0.00324769	0.419428	0.946923	0.972345
PCDHGB3	chr5_141433209	cg19247475	-0.0346261	0.84417	0.23548	0.460867
PCDHGB3	chr5_141433209	cg19754283	0.0396081	-0.161875	0.669472	0.81526
PCDHGB3	chr5_141433209	cg20938085	-0.0372975	0.925954	0.266185	0.491464
PCDHGB3	chr5_141433209	cg21101631	-0.0180069	0.293176	0.561614	0.746379
PCDHGB3	chr5_141433209	cg21117330	-0.00747229	0.54651	0.850621	0.92015
PCDHGB3	chr5_141433209	cg21157357	-0.0224891	1.038	0.600722	0.770868
PCDHGB3	chr5_141433209	cg21185686	-0.0314241	0.587985	0.369399	0.590859
PCDHGB3	chr5_141433209	cg21580428	-0.0576662	0.550702	0.0318017	0.132743
PCDHGB3	chr5_141433209	cg21627409	-0.0235031	0.136434	0.491127	0.696287
PCDHGB3	chr5_141433209	cg21908557	-0.0382226	0.428474	0.218161	0.441822
PCDHGB3	chr5_141433209	cg22052948	-0.0470072	1.17129	0.269632	0.494875
PCDHGB3	chr5_141433209	cg22082176	0.0198633	-0.182076	0.384108	0.603786
PCDHGB3	chr5_141433209	cg22151446	-0.0370265	0.450577	0.25371	0.479997
PCDHGB3	chr5_141433209	cg22175873	-0.0325446	0.676289	0.27702	0.501112
PCDHGB3	chr5_141433209	cg22463553	-0.0120771	0.561979	0.730581	0.849527
PCDHGB3	chr5_141433209	cg22648135	-0.0677447	0.864624	0.0836028	0.248654
PCDHGB3	chr5_141433209	cg22692868	-0.0152484	0.604952	0.675197	0.817978
PCDHGB3	chr5_141433209	cg22737624	-0.0557674	0.907299	0.191386	0.407529
PCDHGB3	chr5_141433209	cg22847228	-0.0744901	0.585373	0.0372069	0.147766
PCDHGB3	chr5_141433209	cg22861116	-0.0962154	1.43212	0.0416813	0.15763
PCDHGB3	chr5_141433209	cg23082339	0.0192042	-0.553407	0.609438	0.775441
PCDHGB3	chr5_141433209	cg23244790	-0.0263297	0.299874	0.440699	0.653335
PCDHGB3	chr5_141433209	cg23347399	-0.0743897	1.18732	0.0697112	0.22118
PCDHGB3	chr5_141433209	cg23348764	-0.0338422	0.380867	0.335816	0.558559
PCDHGB3	chr5_141433209	cg23359276	-0.0915246	0.319637	0.179928	0.391465
PCDHGB3	chr5_141433209	cg23445461	-0.079579	0.816556	0.101515	0.280555
PCDHGB3	chr5_141433209	cg24024424	0.0094398	-0.0272302	0.691094	0.825884
PCDHGB3	chr5_141433209	cg24155123	0.0529002	-0.53278	0.130286	0.32362
PCDHGB3	chr5_141433209	cg24172509	-0.0226551	1.27873	0.746246	0.856324
PCDHGB3	chr5_141433209	cg24619378	-0.0236461	0.54521	0.394908	0.612693
PCDHGB3	chr5_141433209	cg24633027	-0.0680859	2.27202	0.114698	0.300065
PCDHGB3	chr5_141433209	cg24656271	-0.0810486	1.17635	0.0103186	0.0596626
PCDHGB3	chr5_141433209	cg24921961	-0.0460603	1.37473	0.140317	0.339413
PCDHGB3	chr5_141433209	cg24942747	-0.0206811	0.506915	0.368501	0.590388
PCDHGB3	chr5_141433209	cg24954895	-0.0466774	0.69077	0.143121	0.343644
PCDHGB3	chr5_141433209	cg25353450	-0.0604537	0.319463	0.2135	0.435627
PCDHGB3	chr5_141433209	cg25426815	-0.109173	1.40186	0.0773396	0.236042
PCDHGB3	chr5_141433209	cg25564433	-0.0744379	1.6727	0.0420062	0.158061
PCDHGB3	chr5_141433209	cg25600472	-0.0220835	0.794978	0.374552	0.595631
PCDHGB3	chr5_141433209	cg25949304	-0.029946	0.514842	0.514447	0.713919
PCDHGB3	chr5_141433209	cg26275431	-0.0510573	0.694331	0.0849772	0.250612
PCDHGB3	chr5_141433209	cg26337998	-0.0627058	0.582067	0.100382	0.279261
PCDHGB3	chr5_141433209	cg26811372	-0.0526635	0.806364	0.27333	0.498217
PCDHGB3	chr5_141433209	cg26826004	-0.0143216	-0.228826	0.553856	0.741734
PCDHGB3	chr5_141433209	cg26843711	-0.038297	0.90122	0.488267	0.693987
PCDHGB3	chr5_141433209	cg26879386	-0.0652928	1.63457	0.029787	0.1267
PCDHGB3	chr5_141433209	cg26890354	0.00772894	-0.216475	0.818314	0.902353
PCDHGB3	chr5_141433209	cg27305357	-0.0215669	0.293116	0.277182	0.501112
PCDHGB3	chr5_141433209	cg27553119	-0.00333486	0.123751	0.880692	0.936329
PCDHGB3	chr5_141433209	cg27639030	0.0118429	-0.243041	0.604752	0.771808
PCDHGB3	chr5_141433209	cg27665767	-0.0102742	0.308401	0.651787	0.802577
PCDHGA6	chr5_141433209	cg00039176	-0.0260424	0.103737	0.601988	0.77108
PCDHGA6	chr5_141433209	cg00048743	-0.0448301	1.00045	0.553744	0.741734
PCDHGA6	chr5_141433209	cg00104845	-0.0341455	0.391128	0.394556	0.612693
PCDHGA6	chr5_141433209	cg00281842	-0.0839925	0.597975	0.352274	0.573319
PCDHGA6	chr5_141433209	cg00283283	0.0377575	-0.543301	0.204775	0.423754
PCDHGA6	chr5_141433209	cg00589850	0.00967097	0.0381797	0.731304	0.849575
PCDHGA6	chr5_141433209	cg00758915	0.0256061	-0.134887	0.602868	0.771128
PCDHGA6	chr5_141433209	cg00808170	-0.00874676	0.475213	0.699169	0.831372
PCDHGA6	chr5_141433209	cg00888801	-0.0147921	0.951409	0.656831	0.806169
PCDHGA6	chr5_141433209	cg00943245	-0.00257988	0.424716	0.944678	0.971695
PCDHGA6	chr5_141433209	cg01000954	0.00192425	2.36544	0.977347	0.989406
PCDHGA6	chr5_141433209	cg01169021	-0.0549069	0.729545	0.123991	0.314453
PCDHGA6	chr5_141433209	cg01224715	-0.0216822	0.995898	0.599662	0.770732
PCDHGA6	chr5_141433209	cg01311360	-0.0218171	-0.233179	0.524904	0.720593
PCDHGA6	chr5_141433209	cg02022733	-0.0825795	1.19331	0.061933	0.204599
PCDHGA6	chr5_141433209	cg02056653	-0.0074568	0.0977109	0.803406	0.894073
PCDHGA6	chr5_141433209	cg02161292	-0.0423553	1.22818	0.266651	0.491464
PCDHGA6	chr5_141433209	cg02267483	-0.0353415	0.651996	0.265567	0.491464
PCDHGA6	chr5_141433209	cg02331883	-0.0381465	0.842474	0.380442	0.600271
PCDHGA6	chr5_141433209	cg02430347	-0.211873	1.58492	0.202678	0.422153
PCDHGA6	chr5_141433209	cg02452944	-0.0344895	0.445296	0.296024	0.519787
PCDHGA6	chr5_141433209	cg02575448	-0.0577002	0.787703	0.301788	0.525987
PCDHGA6	chr5_141433209	cg02707176	-0.0661056	1.11875	0.249047	0.47468
PCDHGA6	chr5_141433209	cg02722596	-0.11756	1.78204	0.0822482	0.246721
PCDHGA6	chr5_141433209	cg02780295	-0.106619	0.844721	0.0503275	0.178742
PCDHGA6	chr5_141433209	cg03415916	-0.0448692	1.26195	0.175281	0.38627
PCDHGA6	chr5_141433209	cg03486475	-0.0571884	1.04158	0.0956729	0.27095
PCDHGA6	chr5_141433209	cg03640756	-0.0574738	0.336947	0.139612	0.338771
PCDHGA6	chr5_141433209	cg03835609	-0.0467961	0.429386	0.388354	0.607512
PCDHGA6	chr5_141433209	cg03892308	-0.0337444	1.10943	0.288002	0.510998
PCDHGA6	chr5_141433209	cg03898577	0.0265345	-0.547402	0.571245	0.753292
PCDHGA6	chr5_141433209	cg03898832	0.00449775	1.15129	0.909339	0.951816
PCDHGA6	chr5_141433209	cg04080041	0.0222948	-0.338628	0.403327	0.619714
PCDHGA6	chr5_141433209	cg04117404	-0.0350626	0.649403	0.514604	0.713919
PCDHGA6	chr5_141433209	cg04160343	0.00712662	0.416741	0.858827	0.924877
PCDHGA6	chr5_141433209	cg04242499	-0.0642662	0.99014	0.0839405	0.248985
PCDHGA6	chr5_141433209	cg04453180	-0.0496503	0.555901	0.323677	0.546855
PCDHGA6	chr5_141433209	cg04503600	-0.0253607	0.614062	0.460675	0.672974
PCDHGA6	chr5_141433209	cg04637478	-0.0236055	0.437672	0.471236	0.680848
PCDHGA6	chr5_141433209	cg04726784	-0.0387919	0.144292	0.23375	0.459247
PCDHGA6	chr5_141433209	cg04964031	-0.0172776	0.246305	0.573558	0.754164
PCDHGA6	chr5_141433209	cg05149776	0.011221	0.402159	0.734194	0.850861
PCDHGA6	chr5_141433209	cg05197036	0.0730347	-0.0975403	0.0648105	0.211051
PCDHGA6	chr5_141433209	cg05494467	-0.0309666	0.517928	0.370826	0.591856
PCDHGA6	chr5_141433209	cg05670472	-0.0261941	0.309718	0.473565	0.682313
PCDHGA6	chr5_141433209	cg05870739	-0.0618802	0.523237	0.103383	0.283036
PCDHGA6	chr5_141433209	cg06065872	-0.0308484	1.58416	0.560073	0.745581
PCDHGA6	chr5_141433209	cg06428620	-0.0254137	0.405805	0.633473	0.791258
PCDHGA6	chr5_141433209	cg06572465	-0.0541584	0.579811	0.170727	0.381142
PCDHGA6	chr5_141433209	cg06757585	-0.0480914	0.971097	0.187065	0.40145
PCDHGA6	chr5_141433209	cg06776159	-0.0610177	1.63708	0.134706	0.331074
PCDHGA6	chr5_141433209	cg07017875	0.00745766	-0.0238189	0.722543	0.844534
PCDHGA6	chr5_141433209	cg07179872	-0.0435135	0.737072	0.231063	0.456819
PCDHGA6	chr5_141433209	cg07231479	-0.0377706	0.712059	0.138831	0.337734
PCDHGA6	chr5_141433209	cg07445963	-0.0122834	0.0418168	0.638845	0.794719
PCDHGA6	chr5_141433209	cg07448606	-0.0654057	-0.082453	0.25655	0.481987
PCDHGA6	chr5_141433209	cg07489502	-0.0796497	1.39225	0.229666	0.455343
PCDHGA6	chr5_141433209	cg07524997	-0.0289988	0.494463	0.649354	0.801255
PCDHGA6	chr5_141433209	cg07539798	-0.0154203	0.632429	0.639314	0.794719
PCDHGA6	chr5_141433209	cg07608474	0.00495237	1.60834	0.921752	0.958961
PCDHGA6	chr5_141433209	cg07613945	-0.0440035	0.818663	0.392906	0.611575
PCDHGA6	chr5_141433209	cg07620533	-0.0704527	0.84452	0.0377454	0.148747
PCDHGA6	chr5_141433209	cg07717903	-0.057705	1.386	0.112988	0.297469
PCDHGA6	chr5_141433209	cg07730329	-0.0427012	0.771273	0.239562	0.464785
PCDHGA6	chr5_141433209	cg07802710	-0.00946916	0.0828286	0.739644	0.853974
PCDHGA6	chr5_141433209	cg08155325	-0.00373397	0.504242	0.923772	0.959857
PCDHGA6	chr5_141433209	cg08292467	-0.0327339	0.751127	0.31287	0.536538
PCDHGA6	chr5_141433209	cg08395122	-0.0199376	0.325633	0.391367	0.610174
PCDHGA6	chr5_141433209	cg08616061	-0.0469657	0.698542	0.122036	0.311452
PCDHGA6	chr5_141433209	cg08935238	-0.00937258	0.356931	0.745806	0.856324
PCDHGA6	chr5_141433209	cg09066326	-0.0684397	1.05078	0.211666	0.433909
PCDHGA6	chr5_141433209	cg09484752	-0.00398891	0.70467	0.887681	0.940614
PCDHGA6	chr5_141433209	cg09570348	-0.0632485	1.2201	0.377377	0.59777
PCDHGA6	chr5_141433209	cg09581226	-0.0342298	0.843192	0.175554	0.38627
PCDHGA6	chr5_141433209	cg09639151	-0.0590042	0.762521	0.0657724	0.212471
PCDHGA6	chr5_141433209	cg10475970	-0.015479	0.280001	0.529446	0.723354
PCDHGA6	chr5_141433209	cg10679597	-0.0142473	0.40612	0.691842	0.826053
PCDHGA6	chr5_141433209	cg10858746	-0.117571	1.08735	0.147062	0.347865
PCDHGA6	chr5_141433209	cg10917547	-0.03072	0.3986	0.396471	0.613759
PCDHGA6	chr5_141433209	cg11014124	0.04912	0.297364	0.536902	0.728883
PCDHGA6	chr5_141433209	cg11086421	-0.0432143	0.450962	0.173257	0.384033
PCDHGA6	chr5_141433209	cg11210069	-0.10033	1.80227	0.0322338	0.133944
PCDHGA6	chr5_141433209	cg11647681	-0.0357878	0.551828	0.234084	0.459247
PCDHGA6	chr5_141433209	cg11655243	-0.020476	0.961178	0.684729	0.822771
PCDHGA6	chr5_141433209	cg11830096	-0.145746	3.11222	0.0294711	0.125918
PCDHGA6	chr5_141433209	cg11907797	-0.0430222	0.787415	0.128442	0.321001
PCDHGA6	chr5_141433209	cg12145907	-0.044147	0.57772	0.196538	0.414218
PCDHGA6	chr5_141433209	cg12304520	-0.0379056	0.828302	0.475274	0.683136
PCDHGA6	chr5_141433209	cg12459904	-0.070246	1.08132	0.0538464	0.186879
PCDHGA6	chr5_141433209	cg12487901	0.0110663	-0.175186	0.681431	0.820875
PCDHGA6	chr5_141433209	cg12648074	-0.0486042	0.72121	0.11826	0.305528
PCDHGA6	chr5_141433209	cg12877039	-0.0171925	0.536889	0.614762	0.778703
PCDHGA6	chr5_141433209	cg13023584	-0.108983	2.39377	0.0757032	0.233252
PCDHGA6	chr5_141433209	cg13598256	-0.0101727	-0.0234512	0.787928	0.883684
PCDHGA6	chr5_141433209	cg13718539	-0.0335721	0.578869	0.279394	0.502344
PCDHGA6	chr5_141433209	cg13933262	-0.0896678	0.659149	0.178923	0.39033
PCDHGA6	chr5_141433209	cg13972793	-0.00714313	0.166983	0.701633	0.832322
PCDHGA6	chr5_141433209	cg13993336	-0.111461	0.803594	0.106956	0.289051
PCDHGA6	chr5_141433209	cg14253517	0.00417436	-0.00417787	0.878081	0.935539
PCDHGA6	chr5_141433209	cg14458068	-0.0601463	1.00225	0.13164	0.325828
PCDHGA6	chr5_141433209	cg14566959	-0.0204634	1.16357	0.599314	0.770732
PCDHGA6	chr5_141433209	cg14672084	-0.0482834	1.33372	0.595672	0.769465
PCDHGA6	chr5_141433209	cg14681511	-0.00885685	0.267703	0.839205	0.913677
PCDHGA6	chr5_141433209	cg15004405	0.000809452	0.352956	0.970225	0.98533
PCDHGA6	chr5_141433209	cg15124968	-0.0885271	0.574615	0.0438587	0.16253
PCDHGA6	chr5_141433209	cg15361590	-0.0533607	0.615817	0.144363	0.344609
PCDHGA6	chr5_141433209	cg15874877	-0.044702	1.32342	0.247484	0.47397
PCDHGA6	chr5_141433209	cg15949044	-0.0697219	0.763419	0.0905958	0.261704
PCDHGA6	chr5_141433209	cg15988320	0.0428184	-0.831279	0.110803	0.295269
PCDHGA6	chr5_141433209	cg16032518	-0.0105573	0.249569	0.704041	0.83292
PCDHGA6	chr5_141433209	cg16316394	-0.0220833	0.936132	0.628214	0.78768
PCDHGA6	chr5_141433209	cg16505764	-0.0373292	0.866022	0.274613	0.499219
PCDHGA6	chr5_141433209	cg17108383	-0.00985816	1.18435	0.833781	0.910528
PCDHGA6	chr5_141433209	cg17227466	-0.0914133	1.08902	0.259111	0.484801
PCDHGA6	chr5_141433209	cg17297238	-0.0267614	0.49318	0.435085	0.64789
PCDHGA6	chr5_141433209	cg17857974	-0.0130836	0.327144	0.802517	0.894057
PCDHGA6	chr5_141433209	cg17982031	-0.0140194	0.317354	0.681025	0.820875
PCDHGA6	chr5_141433209	cg18054674	-0.0540777	1.2724	0.159546	0.365123
PCDHGA6	chr5_141433209	cg18118262	-0.0676596	1.22047	0.535343	0.728211
PCDHGA6	chr5_141433209	cg18164784	-0.0764164	1.10076	0.0872395	0.254922
PCDHGA6	chr5_141433209	cg18507379	-0.0518329	0.602563	0.339275	0.561554
PCDHGA6	chr5_141433209	cg18617005	-0.061029	0.777743	0.246078	0.472835
PCDHGA6	chr5_141433209	cg18858331	-0.0142797	0.377071	0.523144	0.719825
PCDHGA6	chr5_141433209	cg18869485	0.00324769	0.419428	0.946923	0.972345
PCDHGA6	chr5_141433209	cg19247475	-0.0346261	0.84417	0.23548	0.460867
PCDHGA6	chr5_141433209	cg19754283	0.0396081	-0.161875	0.669472	0.81526
PCDHGA6	chr5_141433209	cg20938085	-0.0372975	0.925954	0.266185	0.491464
PCDHGA6	chr5_141433209	cg21101631	-0.0180069	0.293176	0.561614	0.746379
PCDHGA6	chr5_141433209	cg21117330	-0.00747229	0.54651	0.850621	0.92015
PCDHGA6	chr5_141433209	cg21157357	-0.0224891	1.038	0.600722	0.770868
PCDHGA6	chr5_141433209	cg21185686	-0.0314241	0.587985	0.369399	0.590859
PCDHGA6	chr5_141433209	cg21580428	-0.0576662	0.550702	0.0318017	0.132743
PCDHGA6	chr5_141433209	cg21627409	-0.0235031	0.136434	0.491127	0.696287
PCDHGA6	chr5_141433209	cg21908557	-0.0382226	0.428474	0.218161	0.441822
PCDHGA6	chr5_141433209	cg22052948	-0.0470072	1.17129	0.269632	0.494875
PCDHGA6	chr5_141433209	cg22082176	0.0198633	-0.182076	0.384108	0.603786
PCDHGA6	chr5_141433209	cg22151446	-0.0370265	0.450577	0.25371	0.479997
PCDHGA6	chr5_141433209	cg22175873	-0.0325446	0.676289	0.27702	0.501112
PCDHGA6	chr5_141433209	cg22463553	-0.0120771	0.561979	0.730581	0.849527
PCDHGA6	chr5_141433209	cg22648135	-0.0677447	0.864624	0.0836028	0.248654
PCDHGA6	chr5_141433209	cg22692868	-0.0152484	0.604952	0.675197	0.817978
PCDHGA6	chr5_141433209	cg22737624	-0.0557674	0.907299	0.191386	0.407529
PCDHGA6	chr5_141433209	cg22847228	-0.0744901	0.585373	0.0372069	0.147766
PCDHGA6	chr5_141433209	cg22861116	-0.0962154	1.43212	0.0416813	0.15763
PCDHGA6	chr5_141433209	cg23082339	0.0192042	-0.553407	0.609438	0.775441
PCDHGA6	chr5_141433209	cg23244790	-0.0263297	0.299874	0.440699	0.653335
PCDHGA6	chr5_141433209	cg23347399	-0.0743897	1.18732	0.0697112	0.22118
PCDHGA6	chr5_141433209	cg23348764	-0.0338422	0.380867	0.335816	0.558559
PCDHGA6	chr5_141433209	cg23359276	-0.0915246	0.319637	0.179928	0.391465
PCDHGA6	chr5_141433209	cg23445461	-0.079579	0.816556	0.101515	0.280555
PCDHGA6	chr5_141433209	cg24024424	0.0094398	-0.0272302	0.691094	0.825884
PCDHGA6	chr5_141433209	cg24155123	0.0529002	-0.53278	0.130286	0.32362
PCDHGA6	chr5_141433209	cg24172509	-0.0226551	1.27873	0.746246	0.856324
PCDHGA6	chr5_141433209	cg24619378	-0.0236461	0.54521	0.394908	0.612693
PCDHGA6	chr5_141433209	cg24633027	-0.0680859	2.27202	0.114698	0.300065
PCDHGA6	chr5_141433209	cg24656271	-0.0810486	1.17635	0.0103186	0.0596626
PCDHGA6	chr5_141433209	cg24921961	-0.0460603	1.37473	0.140317	0.339413
PCDHGA6	chr5_141433209	cg24942747	-0.0206811	0.506915	0.368501	0.590388
PCDHGA6	chr5_141433209	cg24954895	-0.0466774	0.69077	0.143121	0.343644
PCDHGA6	chr5_141433209	cg25353450	-0.0604537	0.319463	0.2135	0.435627
PCDHGA6	chr5_141433209	cg25426815	-0.109173	1.40186	0.0773396	0.236042
PCDHGA6	chr5_141433209	cg25564433	-0.0744379	1.6727	0.0420062	0.158061
PCDHGA6	chr5_141433209	cg25600472	-0.0220835	0.794978	0.374552	0.595631
PCDHGA6	chr5_141433209	cg25949304	-0.029946	0.514842	0.514447	0.713919
PCDHGA6	chr5_141433209	cg26275431	-0.0510573	0.694331	0.0849772	0.250612
PCDHGA6	chr5_141433209	cg26337998	-0.0627058	0.582067	0.100382	0.279261
PCDHGA6	chr5_141433209	cg26811372	-0.0526635	0.806364	0.27333	0.498217
PCDHGA6	chr5_141433209	cg26826004	-0.0143216	-0.228826	0.553856	0.741734
PCDHGA6	chr5_141433209	cg26843711	-0.038297	0.90122	0.488267	0.693987
PCDHGA6	chr5_141433209	cg26879386	-0.0652928	1.63457	0.029787	0.1267
PCDHGA6	chr5_141433209	cg26890354	0.00772894	-0.216475	0.818314	0.902353
PCDHGA6	chr5_141433209	cg27305357	-0.0215669	0.293116	0.277182	0.501112
PCDHGA6	chr5_141433209	cg27553119	-0.00333486	0.123751	0.880692	0.936329
PCDHGA6	chr5_141433209	cg27639030	0.0118429	-0.243041	0.604752	0.771808
PCDHGA6	chr5_141433209	cg27665767	-0.0102742	0.308401	0.651787	0.802577
PTPN22	chr1_113857574	cg00041401	0.096606	-0.85435	0.16813	0.378013
PTPN22	chr1_113857574	cg00916635	0.11707	-0.994461	0.238815	0.464108
PTPN22	chr1_113857574	cg02710503	0.0484345	0.0110125	0.534637	0.728149
PTPN22	chr1_113857574	cg07111834	0.1444	-1.30072	0.364607	0.586746
PTPN22	chr1_113857574	cg10572465	-0.000553291	0.575997	0.994862	0.997712
PTPN22	chr1_113857574	cg14385738	0.101252	-0.901249	0.170318	0.381142
PTPN22	chr1_113857574	cg26035817	0.163826	-0.568792	0.0884773	0.257678
RELCH	chr18_62275354	cg00049330	0.0114245	-1.56254	0.208657	0.430047
RELCH	chr18_62275354	cg00284005	-0.0117524	-0.655651	0.161993	0.368522
RELCH	chr18_62275354	cg00854751	0.02176	-1.24216	0.0112879	0.0636637
RELCH	chr18_62275354	cg02043585	-0.00265534	-0.883214	0.81558	0.90073
RELCH	chr18_62275354	cg09124093	0.0256136	-1.4432	0.00345591	0.0270941
RELCH	chr18_62275354	cg12438558	0.016232	-1.46062	0.0510585	0.180483
RELCH	chr18_62275354	cg14387610	-0.0114105	-0.850008	0.414002	0.629485
RELCH	chr18_62275354	cg18633379	0.0252863	-1.4388	0.00129399	0.0128202
RELCH	chr18_62275354	cg18661731	0.0159013	-1.91709	0.271902	0.49699
RELCH	chr18_62275354	cg22568695	-0.00829997	1.4953	0.630801	0.78978
RELCH	chr18_62275354	cg23570958	0.0023756	-1.03879	0.796579	0.890155
RPS6KA2	chr6_166418093	cg00053135	-0.00544714	1.23993	0.825398	0.905781
RPS6KA2	chr6_166418093	cg00120254	-0.0256182	0.993304	0.153337	0.357262
RPS6KA2	chr6_166418093	cg00139242	0.000579614	1.388	0.978241	0.98956
RPS6KA2	chr6_166418093	cg00180909	0.0311235	0.0305585	0.0710544	0.224626
RPS6KA2	chr6_166418093	cg00231299	-0.0168774	1.54372	0.543138	0.733818
RPS6KA2	chr6_166418093	cg00267142	0.00985946	0.599189	0.688638	0.825297
RPS6KA2	chr6_166418093	cg00269615	0.0167416	1.22016	0.259508	0.485197
RPS6KA2	chr6_166418093	cg00271210	-0.0240712	0.280908	0.0715402	0.225688
RPS6KA2	chr6_166418093	cg00278517	-0.00220234	-0.174369	0.846193	0.917831
RPS6KA2	chr6_166418093	cg00380924	0.0036525	0.221314	0.814025	0.899978
RPS6KA2	chr6_166418093	cg00414041	0.0672854	-0.300751	0.00370238	0.0284644
RPS6KA2	chr6_166418093	cg00424286	0.0195024	0.168028	0.416179	0.631971
RPS6KA2	chr6_166418093	cg00734124	-0.0183936	0.722222	0.307913	0.53291
RPS6KA2	chr6_166418093	cg00949384	-0.039291	1.759	0.0844325	0.249707
RPS6KA2	chr6_166418093	cg01056358	-0.0250011	2.25762	0.240926	0.466741
RPS6KA2	chr6_166418093	cg01108872	-0.0117833	0.86676	0.402291	0.6193
RPS6KA2	chr6_166418093	cg01198887	0.000405926	0.515735	0.980682	0.990586
RPS6KA2	chr6_166418093	cg01259329	0.042333	0.0816257	0.0634131	0.208179
RPS6KA2	chr6_166418093	cg01300852	0.0169498	-0.173011	0.123707	0.314342
RPS6KA2	chr6_166418093	cg01327552	-0.17835	1.92945	1.01273e-06	4.48765e-05
RPS6KA2	chr6_166418093	cg01474925	-0.0230963	1.91798	0.330484	0.554255
RPS6KA2	chr6_166418093	cg01577646	-0.0127813	0.996677	0.329906	0.553727
RPS6KA2	chr6_166418093	cg01612133	-0.0182454	0.53175	0.033007	0.136418
RPS6KA2	chr6_166418093	cg01804233	0.00603437	0.324479	0.641512	0.795912
RPS6KA2	chr6_166418093	cg01837879	-0.0288817	1.85667	0.166011	0.374854
RPS6KA2	chr6_166418093	cg01929744	0.028217	-0.226798	0.000735731	0.00834411
RPS6KA2	chr6_166418093	cg01959716	0.000633515	0.848482	0.974388	0.988542
RPS6KA2	chr6_166418093	cg02049017	-0.0188305	1.77255	0.402642	0.619567
RPS6KA2	chr6_166418093	cg02117489	-0.0305203	1.24784	0.220771	0.445341
RPS6KA2	chr6_166418093	cg02118390	-0.0407126	2.52273	0.142527	0.34315
RPS6KA2	chr6_166418093	cg02135488	-0.070309	2.34627	0.0258782	0.115012
RPS6KA2	chr6_166418093	cg02287007	-0.00984526	0.501911	0.599651	0.770732
RPS6KA2	chr6_166418093	cg02289903	-0.00273607	0.19608	0.834008	0.910528
RPS6KA2	chr6_166418093	cg02565068	0.0345653	-2.38449	0.299906	0.523888
RPS6KA2	chr6_166418093	cg02588532	0.0270645	0.602146	0.156072	0.360932
RPS6KA2	chr6_166418093	cg02624984	-0.0167478	0.880023	0.0977095	0.274811
RPS6KA2	chr6_166418093	cg02655824	-0.0053728	1.74967	0.82705	0.906836
RPS6KA2	chr6_166418093	cg02669193	-0.032693	1.06809	0.0179697	0.0892704
RPS6KA2	chr6_166418093	cg02752812	-0.0256072	0.727093	0.12996	0.3235
RPS6KA2	chr6_166418093	cg03069112	0.0525854	-0.271611	0.00616127	0.0410578
RPS6KA2	chr6_166418093	cg03107179	-0.0232139	1.73654	0.259939	0.48546
RPS6KA2	chr6_166418093	cg03120116	-0.0646801	0.660094	4.96704e-09	6.13692e-07
RPS6KA2	chr6_166418093	cg03329755	-0.218903	4.68943	1.75302e-05	0.000443619
RPS6KA2	chr6_166418093	cg03411865	0.0539251	-0.244863	0.0214948	0.101381
RPS6KA2	chr6_166418093	cg03458455	-0.0306858	0.847246	0.0153475	0.0797919
RPS6KA2	chr6_166418093	cg03474525	-0.0243659	1.40621	0.220624	0.445147
RPS6KA2	chr6_166418093	cg03512256	0.0319232	0.331014	0.152338	0.355839
RPS6KA2	chr6_166418093	cg03849851	-0.00855378	0.749688	0.470052	0.680606
RPS6KA2	chr6_166418093	cg03874201	0.0188345	0.850901	0.284403	0.507872
RPS6KA2	chr6_166418093	cg03962794	-0.000620827	0.13233	0.969873	0.98533
RPS6KA2	chr6_166418093	cg04016606	-0.00516515	-0.627315	0.61435	0.778703
RPS6KA2	chr6_166418093	cg04040935	0.00385686	0.506561	0.778265	0.87631
RPS6KA2	chr6_166418093	cg04126611	-0.0226398	0.983642	0.0497318	0.178132
RPS6KA2	chr6_166418093	cg04130108	-0.00532339	0.651321	0.83005	0.908888
RPS6KA2	chr6_166418093	cg04224624	0.111231	0.233597	0.0495709	0.177738
RPS6KA2	chr6_166418093	cg04287684	0.0414173	-0.0556197	0.00390662	0.02944
RPS6KA2	chr6_166418093	cg04295117	-0.010412	1.87265	0.689585	0.825777
RPS6KA2	chr6_166418093	cg04312970	-0.00846558	1.70591	0.657815	0.807147
RPS6KA2	chr6_166418093	cg04471409	0.014574	-0.795875	0.118765	0.306379
RPS6KA2	chr6_166418093	cg04508687	-0.15456	1.5418	4.24557e-05	0.000913668
RPS6KA2	chr6_166418093	cg04709129	-0.0254165	1.9245	0.270962	0.496015
RPS6KA2	chr6_166418093	cg04813466	-0.00394766	1.765	0.869926	0.93129
RPS6KA2	chr6_166418093	cg04856285	-0.0342216	1.04007	0.00843815	0.0518231
RPS6KA2	chr6_166418093	cg04912501	0.0124254	0.99277	0.425797	0.640097
RPS6KA2	chr6_166418093	cg04953373	-0.0164478	1.17433	0.507822	0.708535
RPS6KA2	chr6_166418093	cg05063670	0.0211165	0.0740699	0.0225601	0.104398
RPS6KA2	chr6_166418093	cg05068730	-0.0334023	1.80384	0.301185	0.525772
RPS6KA2	chr6_166418093	cg05168655	-0.0107584	1.3907	0.615205	0.779016
RPS6KA2	chr6_166418093	cg05521717	-0.0404902	2.16841	0.0526918	0.184395
RPS6KA2	chr6_166418093	cg05545454	-0.00179747	0.572576	0.926917	0.961453
RPS6KA2	chr6_166418093	cg05573767	-0.0359359	0.596711	0.048623	0.175357
RPS6KA2	chr6_166418093	cg05665555	0.0187171	1.20373	0.367238	0.589692
RPS6KA2	chr6_166418093	cg05791862	-0.0154043	0.255376	0.103202	0.283036
RPS6KA2	chr6_166418093	cg06491415	-0.00308101	0.595391	0.82689	0.906755
RPS6KA2	chr6_166418093	cg06543365	-0.0753476	1.9942	0.00428445	0.0315756
RPS6KA2	chr6_166418093	cg06687504	-0.0460252	1.12353	0.0207117	0.0990051
RPS6KA2	chr6_166418093	cg06738379	0.0101524	0.399265	0.387925	0.607512
RPS6KA2	chr6_166418093	cg06806158	0.0107604	0.397131	0.515138	0.714266
RPS6KA2	chr6_166418093	cg06960413	0.034763	0.0144175	0.072805	0.22757
RPS6KA2	chr6_166418093	cg06960700	0.0127443	-0.0559624	0.281648	0.504583
RPS6KA2	chr6_166418093	cg07015190	-0.192583	1.62469	6.21272e-07	3.02152e-05
RPS6KA2	chr6_166418093	cg07109551	-0.0189185	0.738747	0.0937127	0.267729
RPS6KA2	chr6_166418093	cg07237089	-0.00528717	0.516473	0.550461	0.740387
RPS6KA2	chr6_166418093	cg07253384	-0.00861591	0.331623	0.60969	0.775441
RPS6KA2	chr6_166418093	cg07281125	-0.0281737	1.86147	0.291918	0.51594
RPS6KA2	chr6_166418093	cg07404200	-0.004046	0.152625	0.602883	0.771128
RPS6KA2	chr6_166418093	cg07790342	-0.0198534	1.78799	0.325562	0.548893
RPS6KA2	chr6_166418093	cg08109681	0.00872688	0.456471	0.567978	0.751342
RPS6KA2	chr6_166418093	cg08186384	-0.0399839	-0.289246	0.0262303	0.116183
RPS6KA2	chr6_166418093	cg08298724	-0.0318317	1.41718	0.3128	0.536538
RPS6KA2	chr6_166418093	cg08427782	-0.00161358	0.593014	0.872782	0.932715
RPS6KA2	chr6_166418093	cg08462030	0.0103992	-0.0719276	0.419129	0.633975
RPS6KA2	chr6_166418093	cg08480566	-0.0390104	1.06324	0.0710753	0.224626
RPS6KA2	chr6_166418093	cg08557970	0.0227448	0.427553	0.178595	0.390263
RPS6KA2	chr6_166418093	cg08596842	-0.0176888	1.8293	0.284623	0.508092
RPS6KA2	chr6_166418093	cg08694723	0.00718927	1.21185	0.59509	0.769465
RPS6KA2	chr6_166418093	cg08770734	0.00230523	1.55492	0.885919	0.93998
RPS6KA2	chr6_166418093	cg08802604	0.0155019	-0.771581	0.158456	0.36385
RPS6KA2	chr6_166418093	cg09184730	-0.186748	1.66576	1.34809e-05	0.000361125
RPS6KA2	chr6_166418093	cg09219547	0.00684585	0.155692	0.686963	0.82376
RPS6KA2	chr6_166418093	cg09233791	0.0111352	0.641138	0.648881	0.801255
RPS6KA2	chr6_166418093	cg09238726	-0.0300074	1.06115	0.153736	0.357594
RPS6KA2	chr6_166418093	cg09305113	-0.00283131	0.585697	0.829528	0.90851
RPS6KA2	chr6_166418093	cg09340511	0.0119728	1.67378	0.499966	0.703296
RPS6KA2	chr6_166418093	cg09966309	0.0344118	-0.628303	0.000639058	0.0074654
RPS6KA2	chr6_166418093	cg09987129	-0.206212	2.11744	6.54765e-07	3.16882e-05
RPS6KA2	chr6_166418093	cg10647833	-0.0448078	1.14583	0.155522	0.360319
RPS6KA2	chr6_166418093	cg10676481	0.0114532	1.48402	0.447255	0.659669
RPS6KA2	chr6_166418093	cg10698889	-0.0070312	1.235	0.718367	0.843032
RPS6KA2	chr6_166418093	cg11314174	0.011904	1.14465	0.373237	0.594755
RPS6KA2	chr6_166418093	cg11326758	0.0101836	1.28966	0.487039	0.693765
RPS6KA2	chr6_166418093	cg11387340	0.0464222	-0.783961	4.97713e-08	3.95983e-06
RPS6KA2	chr6_166418093	cg11454936	0.0142737	-0.212538	0.12816	0.321001
RPS6KA2	chr6_166418093	cg11599721	0.00922468	0.350212	0.493025	0.697904
RPS6KA2	chr6_166418093	cg11744817	0.00154709	0.247996	0.930557	0.963683
RPS6KA2	chr6_166418093	cg11837817	-0.0256882	1.82977	0.223715	0.44914
RPS6KA2	chr6_166418093	cg11986980	0.015036	0.959102	0.466495	0.677648
RPS6KA2	chr6_166418093	cg12285184	-0.0217332	1.15125	0.332932	0.556456
RPS6KA2	chr6_166418093	cg12308909	-0.0304812	-0.168928	0.0291898	0.125379
RPS6KA2	chr6_166418093	cg12495975	0.00517739	1.09461	0.804851	0.894828
RPS6KA2	chr6_166418093	cg12686477	-0.0393406	1.27744	0.00187053	0.0169786
RPS6KA2	chr6_166418093	cg12983741	-0.0237743	0.77288	0.220964	0.445578
RPS6KA2	chr6_166418093	cg13072943	-0.011248	0.530715	0.409829	0.625676
RPS6KA2	chr6_166418093	cg13217373	-0.0466729	0.923929	0.00341056	0.0269502
RPS6KA2	chr6_166418093	cg13351061	-0.00589876	0.491533	0.515736	0.714358
RPS6KA2	chr6_166418093	cg13386903	-0.0121543	0.742043	0.255198	0.481168
RPS6KA2	chr6_166418093	cg13431760	-0.0106029	1.57251	0.478221	0.686198
RPS6KA2	chr6_166418093	cg13502382	0.0515962	0.84204	0.0550077	0.189656
RPS6KA2	chr6_166418093	cg13580755	0.0696007	0.366912	0.0407135	0.155255
RPS6KA2	chr6_166418093	cg13906646	-0.0376121	1.84693	0.14764	0.348979
RPS6KA2	chr6_166418093	cg14078070	-0.0270961	0.831303	0.0201836	0.0970191
RPS6KA2	chr6_166418093	cg14261291	0.0205117	0.996356	0.309618	0.533683
RPS6KA2	chr6_166418093	cg14574127	-0.0104776	-0.916146	0.402774	0.619679
RPS6KA2	chr6_166418093	cg14718836	-0.00349317	1.85335	0.862796	0.927458
[truncated: 8,503 more rows]

## Sheet: UCEC
gene	str_id	cg	coef	intercept	p_value	adj_p
AGA	chr4_177436361	cg00004818	0.0369697	-0.858083	0.0229099	0.107412
AGA	chr4_177436361	cg00398048	0.0254433	-0.464803	0.166461	0.408818
AGA	chr4_177436361	cg00826892	0.0632556	0.0793128	0.0461527	0.176836
AGA	chr4_177436361	cg02155262	0.0273582	-0.996724	0.0734508	0.242274
AGA	chr4_177436361	cg04514020	0.0252714	-1.04274	0.15524	0.395679
AGA	chr4_177436361	cg07155684	0.0434088	-0.0675344	0.163677	0.406827
AGA	chr4_177436361	cg07536998	0.0226037	-0.760702	0.0562314	0.203353
AGA	chr4_177436361	cg09947881	0.0573394	-1.65682	0.0152494	0.0817981
AGA	chr4_177436361	cg09976051	-0.0500506	0.822157	0.166813	0.4089
AGA	chr4_177436361	cg11143796	0.0216913	-1.20406	0.473062	0.729332
AGA	chr4_177436361	cg14414876	0.00959592	0.699231	0.703634	0.879219
AGA	chr4_177436361	cg14564766	0.0130309	0.746842	0.671435	0.866482
AGA	chr4_177436361	cg14772412	-0.0450902	1.18327	0.186301	0.435454
AGA	chr4_177436361	cg16070743	-0.0213996	-0.353392	0.463696	0.721866
AGA	chr4_177436361	cg27436044	-0.0112181	1.39366	0.61605	0.831455
TTC6	chr14_37792253	cg00018845	-0.0850749	0.550844	0.10639	0.313546
TTC6	chr14_37792253	cg00691226	0.0787023	0.101274	0.271952	0.535938
TTC6	chr14_37792253	cg00744656	0.0228555	-0.742932	0.462119	0.721165
TTC6	chr14_37792253	cg00789812	0.0529336	0.263342	0.358154	0.626831
TTC6	chr14_37792253	cg00864530	0.110914	-0.535797	0.196341	0.449882
TTC6	chr14_37792253	cg00896578	0.191313	-0.422012	0.0418446	0.166129
TTC6	chr14_37792253	cg00955911	-0.134823	0.962146	0.431977	0.69118
TTC6	chr14_37792253	cg01021196	0.023876	-0.0270991	0.879326	0.951203
TTC6	chr14_37792253	cg01075271	0.0517338	-0.136632	0.390189	0.655599
TTC6	chr14_37792253	cg01085210	-0.0645889	0.225899	0.535448	0.777399
TTC6	chr14_37792253	cg01087008	-0.0429342	0.360328	0.328981	0.600789
TTC6	chr14_37792253	cg01218587	0.0657773	-0.100391	0.230473	0.494525
TTC6	chr14_37792253	cg01231377	0.0310212	0.465865	0.698315	0.877686
TTC6	chr14_37792253	cg01662117	0.0629308	-1.23389	0.248215	0.511625
TTC6	chr14_37792253	cg01739725	-0.107141	0.674338	0.366489	0.635347
TTC6	chr14_37792253	cg01824511	0.0370661	-0.561531	0.215461	0.476481
TTC6	chr14_37792253	cg01892516	0.0939532	-2.1345	0.383417	0.648453
TTC6	chr14_37792253	cg01954957	0.0180992	0.521573	0.804732	0.923192
TTC6	chr14_37792253	cg02222901	0.227316	-0.63984	0.0134056	0.0747217
TTC6	chr14_37792253	cg03015370	0.0465962	-0.636802	0.0788955	0.254771
TTC6	chr14_37792253	cg03026462	0.0450276	-0.793725	0.350609	0.618949
TTC6	chr14_37792253	cg03502284	-0.02428	-0.230332	0.78503	0.910777
TTC6	chr14_37792253	cg03772350	0.00227283	0.111355	0.979635	0.992016
TTC6	chr14_37792253	cg04193970	0.010445	0.123492	0.900631	0.95932
TTC6	chr14_37792253	cg04215800	-0.0884805	0.797492	0.146445	0.380431
TTC6	chr14_37792253	cg04565337	0.0338024	0.119391	0.661979	0.863036
TTC6	chr14_37792253	cg04806942	-0.106084	0.422295	0.109519	0.316659
TTC6	chr14_37792253	cg04932551	0.0148517	0.018062	0.890793	0.954049
TTC6	chr14_37792253	cg05168491	0.0126815	0.104363	0.707023	0.881572
TTC6	chr14_37792253	cg05295015	-0.297517	0.925735	0.102917	0.307912
TTC6	chr14_37792253	cg06743552	0.0632833	-0.291625	0.178648	0.421779
TTC6	chr14_37792253	cg06765217	-0.07162	0.625693	0.513831	0.76419
TTC6	chr14_37792253	cg06787731	-0.141335	0.196615	0.254702	0.521907
TTC6	chr14_37792253	cg06961237	0.0358857	-0.286043	0.61728	0.831455
TTC6	chr14_37792253	cg07115626	-0.0535048	0.397837	0.551213	0.787799
TTC6	chr14_37792253	cg08177882	0.120931	-0.444692	0.175316	0.41932
TTC6	chr14_37792253	cg08247587	0.00643398	0.0693035	0.92413	0.967839
TTC6	chr14_37792253	cg09225388	0.0926599	-0.496077	0.0785903	0.254426
TTC6	chr14_37792253	cg09276158	-0.0194426	-1.07443	0.752167	0.893264
TTC6	chr14_37792253	cg10168722	-0.0094412	0.0287905	0.878728	0.951203
TTC6	chr14_37792253	cg10323697	0.02848	-0.523781	0.336573	0.607143
TTC6	chr14_37792253	cg10574863	-0.0731207	0.360617	0.0972161	0.295899
TTC6	chr14_37792253	cg10724086	0.0512787	-0.75252	0.165294	0.406971
TTC6	chr14_37792253	cg10988041	0.0301498	-0.163008	0.483195	0.737009
TTC6	chr14_37792253	cg11090582	0.10301	-0.246221	0.277141	0.542919
TTC6	chr14_37792253	cg11122170	0.129746	-0.325381	0.153011	0.392186
TTC6	chr14_37792253	cg11260422	0.0554231	-0.77576	0.177314	0.42054
TTC6	chr14_37792253	cg12200038	-0.0337449	0.346774	0.679645	0.87255
TTC6	chr14_37792253	cg12978105	0.0540515	-0.0536415	0.537728	0.778946
TTC6	chr14_37792253	cg13695075	0.119042	0.161566	0.216093	0.476481
TTC6	chr14_37792253	cg14041452	-0.0499932	0.448566	0.447404	0.704634
TTC6	chr14_37792253	cg15416735	-0.0855346	-0.203507	0.549424	0.78765
TTC6	chr14_37792253	cg15914828	-0.160307	0.636786	0.0844183	0.266891
TTC6	chr14_37792253	cg16404784	0.0974814	-0.613542	0.062742	0.219568
TTC6	chr14_37792253	cg16527491	0.0990076	-0.993396	0.0561325	0.203353
TTC6	chr14_37792253	cg16539957	-0.01455	0.111478	0.869108	0.951203
TTC6	chr14_37792253	cg16581536	-0.0169057	-0.74028	0.76567	0.900446
TTC6	chr14_37792253	cg16703420	0.0999545	-0.357231	0.201795	0.457879
TTC6	chr14_37792253	cg16763443	0.0118569	0.322105	0.888922	0.953682
TTC6	chr14_37792253	cg18252039	-0.0197196	0.253363	0.752795	0.893596
TTC6	chr14_37792253	cg18294691	0.0391293	-0.111712	0.547463	0.787265
TTC6	chr14_37792253	cg18390865	-0.0159427	1.03475	0.884572	0.95136
TTC6	chr14_37792253	cg18888687	0.0552092	0.474997	0.600177	0.8188
TTC6	chr14_37792253	cg19181162	-0.0376177	0.398858	0.422162	0.682772
TTC6	chr14_37792253	cg19578835	-0.181933	0.97999	0.360066	0.629425
TTC6	chr14_37792253	cg19802865	0.0860762	-1.32003	0.167818	0.410577
TTC6	chr14_37792253	cg21731375	-0.0965454	0.60127	0.190668	0.441237
TTC6	chr14_37792253	cg22978661	0.180127	-0.476456	0.0657633	0.226332
TTC6	chr14_37792253	cg23032032	0.0415198	-0.635952	0.153716	0.393341
TTC6	chr14_37792253	cg23664186	0.0551047	-0.709759	0.546561	0.786851
TTC6	chr14_37792253	cg24126941	0.000250021	0.110434	0.994962	0.998857
TTC6	chr14_37792253	cg24169669	-0.127296	1.24544	0.431176	0.690527
TTC6	chr14_37792253	cg26670713	0.163182	-0.335811	0.158433	0.400547
ATP5F1E	chr20_59028741	cg00032609	0.0533206	-0.583942	5.01402e-05	0.00110645
ATP5F1E	chr20_59036774	cg00032609	0.0230115	-0.564491	0.0250539	0.113696
ATP5F1E	chr20_59028741	cg01503881	-0.000823562	-1.13726	0.974141	0.989974
ATP5F1E	chr20_59036774	cg01503881	0.0233125	-1.96749	0.308467	0.578997
ATP5F1E	chr20_59028741	cg01789728	0.00954999	-1.1654	0.800632	0.920547
ATP5F1E	chr20_59036774	cg01789728	0.00824753	-1.82122	0.782876	0.910506
ATP5F1E	chr20_59028741	cg03539511	0.0369571	-0.881441	0.0404108	0.16089
ATP5F1E	chr20_59036774	cg03539511	0.0205825	-1.17387	0.124867	0.342889
ATP5F1E	chr20_59028741	cg11595749	0.0438658	-0.812569	0.00648225	0.0449202
ATP5F1E	chr20_59036774	cg11595749	0.0434716	-1.29556	0.000753366	0.00911146
ATP5F1E	chr20_59028741	cg12937378	0.045964	-1.22448	0.00686894	0.0468403
ATP5F1E	chr20_59036774	cg12937378	0.0304091	-1.64353	0.0496472	0.185562
ATP5F1E	chr20_59028741	cg16152482	-0.0113948	-0.791911	0.636095	0.845927
ATP5F1E	chr20_59036774	cg16152482	-0.00410712	-1.26538	0.833896	0.937276
ATP5F1E	chr20_59028741	cg16347018	0.0239364	-0.97868	0.0392575	0.157562
ATP5F1E	chr20_59036774	cg16347018	0.0143594	-1.37412	0.216312	0.476481
ATP5F1E	chr20_59028741	cg18096620	-0.0799524	-0.502614	0.108342	0.315277
ATP5F1E	chr20_59036774	cg18096620	-0.0729784	-0.54738	0.0447779	0.173955
ATP5F1E	chr20_59028741	cg20623172	0.0462844	-0.403542	0.121947	0.337659
ATP5F1E	chr20_59036774	cg20623172	0.0135805	-0.212494	0.537203	0.778946
ATP5F1E	chr20_59028741	cg22231620	0.0747717	-0.0649791	0.0302955	0.130332
ATP5F1E	chr20_59036774	cg22231620	-0.00422712	0.750322	0.87726	0.951203
ATP5F1E	chr20_59028741	cg23831021	-0.0779602	-0.544239	0.00693586	0.0471712
ATP5F1E	chr20_59036774	cg23831021	-0.0364455	-1.29443	0.123312	0.339969
ATP5F1E	chr20_59028741	cg24457521	0.00230862	-0.856458	0.879471	0.951203
ATP5F1E	chr20_59036774	cg24457521	0.0230766	-1.52524	0.093603	0.288459
ATP5F1E	chr20_59028741	cg25630530	-0.070555	1.20541	0.140202	0.371969
ATP5F1E	chr20_59036774	cg25630530	-0.0752617	1.81516	0.0180235	0.0918732
ATP5F1E	chr20_59028741	cg25718604	0.0502383	0.351491	0.161956	0.404634
ATP5F1E	chr20_59036774	cg25718604	-0.0155063	1.11862	0.603348	0.82012
ATP5F1E	chr20_59028741	cg26831148	0.133597	-2.17727	0.00202695	0.0189676
ATP5F1E	chr20_59036774	cg26831148	0.0335102	-2.22152	0.320954	0.59085
FAHD1	chr16_1837877	cg00046913	0.0454329	-1.41828	0.00473008	0.0356704
FAHD1	chr16_1837877	cg00435006	0.0196061	-0.805011	0.0636341	0.221081
FAHD1	chr16_1837877	cg01637482	-0.0118254	0.0165501	0.497705	0.752137
FAHD1	chr16_1837877	cg03086376	0.0118247	-0.768136	0.405442	0.669457
FAHD1	chr16_1837877	cg03638642	0.00750495	-0.635468	0.337076	0.607143
FAHD1	chr16_1837877	cg05617452	0.00983921	-0.514924	0.381944	0.647893
FAHD1	chr16_1837877	cg06757399	-0.0201027	-0.455505	0.286935	0.551501
FAHD1	chr16_1837877	cg06782493	-0.0121784	-0.801002	0.539452	0.780122
FAHD1	chr16_1837877	cg07386859	-0.0948425	1.23091	0.000119028	0.00216445
FAHD1	chr16_1837877	cg07677296	0.0216851	-0.584844	0.000452843	0.00614332
FAHD1	chr16_1837877	cg08546335	-0.021312	-2.78585	0.377145	0.643379
FAHD1	chr16_1837877	cg08983490	-0.0105788	-1.48732	0.583684	0.810181
FAHD1	chr16_1837877	cg09274113	-0.042537	0.140469	0.0087866	0.0556267
FAHD1	chr16_1837877	cg09830162	0.31511	-2.0073	6.72331e-22	1.72386e-18
FAHD1	chr16_1837877	cg16270890	-0.0331733	0.249709	0.0105965	0.0637781
FAHD1	chr16_1837877	cg23048366	-0.00993699	-1.34501	0.523381	0.772566
FAHD1	chr16_1837877	cg25898500	0.00717482	-0.541482	0.311164	0.580901
LTN1	chr21_28966884	cg00065302	-0.00358198	0.604239	0.878775	0.951203
LTN1	chr21_28966884	cg01446372	0.0152406	-1.00994	0.187633	0.437346
LTN1	chr21_28966884	cg03062454	-0.0233752	1.17908	0.521277	0.771393
LTN1	chr21_28966884	cg04873026	0.039247	-1.12257	0.122789	0.338891
LTN1	chr21_28966884	cg08249556	0.0144484	-1.34245	0.317973	0.588487
LTN1	chr21_28966884	cg08807101	0.0266594	-0.997001	0.143901	0.377262
LTN1	chr21_28966884	cg13662262	0.0352848	-0.868959	0.0180912	0.0920353
LTN1	chr21_28966884	cg17756483	-0.062728	1.11865	0.0421036	0.166422
LTN1	chr21_28966884	cg21276834	-0.00922152	-1.19788	0.732586	0.88811
LTN1	chr21_28966884	cg22439241	0.0164643	0.0957632	0.492137	0.74665
LTN1	chr21_28966884	cg23629032	-0.0101906	0.853989	0.61234	0.829393
LTN1	chr21_28966884	cg23864210	0.0250418	-1.20148	0.0435191	0.170111
LTN1	chr21_28966884	cg24477227	0.0175425	-0.964216	0.189248	0.439522
LTN1	chr21_28966884	cg24553619	-0.0317105	1.68402	0.2423	0.506415
LTN1	chr21_28966884	cg24692254	0.0436024	-1.582	0.0448752	0.17407
ANO10	chr3_43605721	cg00090865	0.00322922	-1.09756	0.927259	0.969332
ANO10	chr3_43605721	cg00410650	-0.0204924	1.02666	0.677269	0.870872
ANO10	chr3_43605721	cg00495305	-0.0321562	0.740468	0.467077	0.724055
ANO10	chr3_43605721	cg01019163	0.0424041	-1.14434	0.151171	0.38955
ANO10	chr3_43605721	cg01106145	-0.0109481	-1.24884	0.751454	0.892843
ANO10	chr3_43605721	cg02059996	-0.00669234	-1.32748	0.884405	0.95136
ANO10	chr3_43605721	cg02330114	-0.0103359	0.0430626	0.716621	0.883799
ANO10	chr3_43605721	cg02400538	-0.0945514	1.86475	0.1608	0.403415
ANO10	chr3_43605721	cg02706919	0.128989	-1.07166	0.00200642	0.0188779
ANO10	chr3_43605721	cg03626746	-0.00187222	1.07134	0.986423	0.996411
ANO10	chr3_43605721	cg05553879	-0.0432851	1.27213	0.313701	0.583269
ANO10	chr3_43605721	cg07580010	-0.142487	2.31299	0.114942	0.325234
ANO10	chr3_43605721	cg07675262	-0.125083	2.21087	0.207861	0.467747
ANO10	chr3_43605721	cg07676024	0.0198692	1.14446	0.741414	0.889958
ANO10	chr3_43605721	cg08996790	-0.00411819	-2.05822	0.946991	0.979326
ANO10	chr3_43605721	cg09000302	-0.0615113	1.00045	0.256214	0.522839
ANO10	chr3_43605721	cg09018904	-0.0475124	0.784158	0.656295	0.860737
ANO10	chr3_43605721	cg09428583	0.0269677	0.0092409	0.647318	0.854207
ANO10	chr3_43605721	cg09632416	0.0182288	-1.24774	0.567222	0.800789
ANO10	chr3_43605721	cg09668564	0.0570578	-1.01558	0.224884	0.488098
ANO10	chr3_43605721	cg10501896	0.00218577	-0.938116	0.947644	0.979346
ANO10	chr3_43605721	cg10670501	-8.01138e-05	0.615292	0.998136	0.99954
ANO10	chr3_43605721	cg11168423	-0.0243346	0.904544	0.741754	0.889958
ANO10	chr3_43605721	cg11872583	-0.00967433	0.725903	0.882584	0.951203
ANO10	chr3_43605721	cg12059012	0.031054	-1.4081	0.235799	0.500346
ANO10	chr3_43605721	cg12832630	0.0298932	-1.76079	0.465941	0.72273
ANO10	chr3_43605721	cg13606015	0.0598103	-1.44876	0.194801	0.447519
ANO10	chr3_43605721	cg13698398	-0.0474879	1.46628	0.47636	0.730495
ANO10	chr3_43605721	cg14121103	0.0492838	-0.965771	0.200803	0.456031
ANO10	chr3_43605721	cg14145438	-0.075533	2.38187	0.243239	0.506471
ANO10	chr3_43605721	cg16197346	-0.031563	1.36506	0.59379	0.816332
ANO10	chr3_43605721	cg17200204	0.00521305	-0.546069	0.864506	0.951203
ANO10	chr3_43605721	cg17341955	0.0880304	-1.35	0.050126	0.186161
ANO10	chr3_43605721	cg18034092	-0.00427139	1.91213	0.958989	0.986135
ANO10	chr3_43605721	cg18771737	-0.178547	2.52021	0.0462091	0.176836
ANO10	chr3_43605721	cg18908981	0.0270744	-0.728636	0.303231	0.573161
ANO10	chr3_43605721	cg19150852	-0.00027253	-0.820771	0.993498	0.99817
ANO10	chr3_43605721	cg19251345	0.0161775	-0.804127	0.56927	0.801982
ANO10	chr3_43605721	cg20752553	-0.00847234	1.70366	0.907606	0.962331
ANO10	chr3_43605721	cg21475256	0.0333759	-0.997234	0.29137	0.556685
ANO10	chr3_43605721	cg23044270	-0.010791	1.09918	0.877181	0.951203
ANO10	chr3_43605721	cg23222248	-0.0727045	1.94665	0.327037	0.598278
ANO10	chr3_43605721	cg23239109	-0.00813306	-1.16832	0.818233	0.928643
ANO10	chr3_43605721	cg24074783	-0.0962826	1.56695	0.0781463	0.253952
ANO10	chr3_43605721	cg24524538	-0.0028409	-1.51697	0.959941	0.986135
ANO10	chr3_43605721	cg24595152	-0.0599597	0.823329	0.169112	0.413037
ANO10	chr3_43605721	cg24770703	0.0413254	-1.3714	0.217744	0.478402
ANO10	chr3_43605721	cg24822001	-0.0240541	-1.35008	0.744039	0.890623
ANO10	chr3_43605721	cg25157839	-0.0283381	1.6712	0.746726	0.89259
ANO10	chr3_43605721	cg25587211	-0.192771	-0.173445	0.24172	0.506415
ANO10	chr3_43605721	cg26116045	-0.0305491	-0.313049	0.373268	0.63947
ANO10	chr3_43605721	cg26401673	-0.00195038	0.513053	0.987081	0.996411
ANO10	chr3_43605721	cg27146477	-0.00764413	1.56368	0.916243	0.965577
ANO10	chr3_43605721	cg27260148	0.0296492	-1.12784	0.372152	0.638488
PDLIM5	chr4_94586958	cg00096603	0.0293927	-0.0386802	0.0632343	0.220289
PDLIM5	chr4_94586958	cg00426517	0.0136336	-0.94278	0.00528045	0.0386831
PDLIM5	chr4_94586958	cg00846287	5.49713e-05	1.02904	0.99678	0.999118
PDLIM5	chr4_94586958	cg02383173	-0.05326	1.27326	0.00322301	0.0269179
PDLIM5	chr4_94586958	cg02716173	0.0125538	-1.20705	0.0453101	0.175226
PDLIM5	chr4_94586958	cg03416665	0.0109584	-0.716237	0.231063	0.495081
PDLIM5	chr4_94586958	cg05945869	-0.00509127	0.891112	0.600687	0.8188
PDLIM5	chr4_94586958	cg07236912	0.00352902	0.86727	0.811604	0.925783
PDLIM5	chr4_94586958	cg07319098	0.0108385	-0.729326	0.0442349	0.172368
PDLIM5	chr4_94586958	cg07677047	0.00755653	-0.142079	0.666622	0.864552
PDLIM5	chr4_94586958	cg08839770	0.0106548	-1.31833	0.104716	0.310499
PDLIM5	chr4_94586958	cg09885664	-0.00384213	0.301765	0.738021	0.889958
PDLIM5	chr4_94586958	cg12748915	0.00369759	-1.76266	0.665853	0.864347
PDLIM5	chr4_94586958	cg13680764	0.00651266	-1.33529	0.387481	0.652761
PDLIM5	chr4_94586958	cg14105047	0.0163279	-0.768032	0.00960257	0.0591851
PDLIM5	chr4_94586958	cg16592149	0.00663028	1.02066	0.595583	0.817416
PDLIM5	chr4_94586958	cg17810966	-0.0029723	0.803316	0.840948	0.939927
PDLIM5	chr4_94586958	cg17815886	0.0135931	0.674624	0.243464	0.506471
PDLIM5	chr4_94586958	cg18009021	0.00814844	0.0189737	0.669346	0.865805
PDLIM5	chr4_94586958	cg18831827	0.0179384	-2.14814	0.231321	0.495081
PDLIM5	chr4_94586958	cg19674166	-0.00850531	0.556808	0.583937	0.810181
PDLIM5	chr4_94586958	cg20305610	0.0147787	-0.989727	0.00822612	0.0530373
PDLIM5	chr4_94586958	cg20401102	0.00701687	-1.72528	0.380573	0.647505
PDLIM5	chr4_94586958	cg22100409	0.0119194	-0.860918	0.0391717	0.157562
PDLIM5	chr4_94586958	cg23976221	0.0334847	0.207294	0.0124938	0.0716646
PDLIM5	chr4_94586958	cg26612230	0.0146586	1.05413	0.26086	0.528314
PDLIM5	chr4_94586958	cg26990380	0.00783494	0.88925	0.528082	0.774889
EXT1	chr8_117799568	cg00127070	0.0465124	0.454449	0.104751	0.310499
EXT1	chr8_117799568	cg01423426	-0.0172467	1.30675	0.480918	0.734622
EXT1	chr8_117799568	cg01606878	0.0423636	0.778304	0.219836	0.481349
EXT1	chr8_117799568	cg01664039	-0.0253314	1.4941	0.310368	0.580901
EXT1	chr8_117799568	cg02905663	0.0206323	-1.45881	0.205693	0.464714
EXT1	chr8_117799568	cg02925848	-0.0233536	0.801824	0.279488	0.545364
EXT1	chr8_117799568	cg03134051	-0.0328415	1.36472	0.218172	0.478933
EXT1	chr8_117799568	cg03276982	-0.0649315	1.66807	0.00760671	0.0505103
EXT1	chr8_117799568	cg03599855	0.0898103	-0.426845	0.00289084	0.0249566
EXT1	chr8_117799568	cg04395788	-0.0358326	1.15308	0.177631	0.42054
EXT1	chr8_117799568	cg05313153	-0.152483	1.43027	2.8968e-10	3.09474e-08
EXT1	chr8_117799568	cg05783185	-0.232222	2.38118	1.79753e-12	3.84073e-10
EXT1	chr8_117799568	cg05888894	-0.0796594	1.36729	0.00385819	0.0305197
EXT1	chr8_117799568	cg06401909	-0.084173	2.57987	0.0209196	0.101013
EXT1	chr8_117799568	cg06785302	-0.0181324	-1.50909	0.445517	0.703359
EXT1	chr8_117799568	cg07462677	0.0142764	-1.14954	0.175551	0.41949
EXT1	chr8_117799568	cg08305378	-0.0244502	0.635499	0.142081	0.374789
EXT1	chr8_117799568	cg08796640	-0.227002	1.19013	2.90022e-09	2.25338e-07
EXT1	chr8_117799568	cg10090158	0.00577068	0.930106	0.769603	0.903095
EXT1	chr8_117799568	cg11064524	0.0283064	-0.424905	0.0141312	0.0777518
EXT1	chr8_117799568	cg11170956	-0.235795	3.88445	1.9997e-05	0.000534087
EXT1	chr8_117799568	cg11592677	-0.0240605	0.822966	0.137139	0.367041
EXT1	chr8_117799568	cg11829680	0.00943208	1.02533	0.820261	0.929364
EXT1	chr8_117799568	cg12044130	0.0178607	0.812687	0.401315	0.667298
EXT1	chr8_117799568	cg12669271	-0.0418182	1.21418	0.264662	0.531714
EXT1	chr8_117799568	cg12977135	0.043338	-0.351224	0.109022	0.315854
EXT1	chr8_117799568	cg14028708	-0.0415686	1.77013	0.0956576	0.292412
EXT1	chr8_117799568	cg14388466	-0.118802	2.34355	0.00317625	0.0268776
EXT1	chr8_117799568	cg14433070	0.0229011	0.89339	0.352617	0.620427
EXT1	chr8_117799568	cg14485744	-0.0179442	0.0378203	0.402904	0.668548
EXT1	chr8_117799568	cg15684329	-0.0457962	2.40621	0.160722	0.403415
EXT1	chr8_117799568	cg15694987	-0.0136734	0.245301	0.30424	0.573161
EXT1	chr8_117799568	cg15978494	-0.00631118	1.23246	0.815124	0.926921
EXT1	chr8_117799568	cg16009311	-0.0230221	0.00466154	0.303385	0.573161
EXT1	chr8_117799568	cg16286281	-0.105513	2.02535	0.00086675	0.0102103
EXT1	chr8_117799568	cg16374656	-0.071704	1.2266	0.00429862	0.0332732
EXT1	chr8_117799568	cg16892046	-0.0196518	-2.10216	0.383659	0.648453
EXT1	chr8_117799568	cg17448481	0.0145507	0.908143	0.556266	0.792285
EXT1	chr8_117799568	cg18016148	-0.0115882	0.65288	0.764859	0.900036
EXT1	chr8_117799568	cg18144710	0.0143851	0.855197	0.537459	0.778946
EXT1	chr8_117799568	cg18975462	-0.0217064	-0.215512	0.360127	0.629425
EXT1	chr8_117799568	cg19883066	0.0831306	-0.290634	0.0106241	0.0637946
EXT1	chr8_117799568	cg20039163	-0.0199584	1.39039	0.304064	0.573161
EXT1	chr8_117799568	cg20230340	0.00266183	0.894708	0.91162	0.962946
EXT1	chr8_117799568	cg20389847	-0.0403768	1.38739	0.199713	0.454361
EXT1	chr8_117799568	cg20547777	0.00060757	-0.186088	0.963086	0.986431
EXT1	chr8_117799568	cg20582388	-0.0355194	1.23703	0.160508	0.403415
EXT1	chr8_117799568	cg21602557	-0.344882	2.63347	1.25399e-11	2.00952e-09
EXT1	chr8_117799568	cg21750659	-0.0921798	1.3242	0.000562381	0.00724596
EXT1	chr8_117799568	cg22024281	0.0126943	-2.72994	0.683125	0.873583
EXT1	chr8_117799568	cg22271457	-0.0295593	1.46542	0.237586	0.502617
EXT1	chr8_117799568	cg22747380	0.00708494	0.447372	0.711417	0.881829
EXT1	chr8_117799568	cg22975816	-0.030101	1.88941	0.226716	0.490549
EXT1	chr8_117799568	cg23057936	-0.0433349	1.56123	0.11339	0.322321
EXT1	chr8_117799568	cg23298114	-0.0069772	0.469834	0.748501	0.892843
EXT1	chr8_117799568	cg23554164	0.0310636	-0.592974	0.0232023	0.108362
EXT1	chr8_117799568	cg23736754	0.0423533	-0.265847	0.00231615	0.0209845
EXT1	chr8_117799568	cg23918610	0.0273712	0.805479	0.37141	0.63841
EXT1	chr8_117799568	cg24892992	0.00653404	1.02517	0.770913	0.903392
EXT1	chr8_117799568	cg25956295	-0.0476487	1.96618	0.0202164	0.0985453
EXT1	chr8_117799568	cg26579311	0.0057287	-2.46301	0.854363	0.946667
EXT1	chr8_117799568	ch_8_2343166R	0.0141598	-0.832343	0.531947	0.774889
SMAP1	chr6_70798667	cg00129827	0.065934	-1.09355	0.000143996	0.00247789
SMAP1	chr6_70798667	cg00255719	0.0427616	-1.55459	0.00924375	0.0579486
SMAP1	chr6_70798667	cg01281718	0.0323424	1.03481	0.531611	0.774889
SMAP1	chr6_70798667	cg02847384	0.00880124	-1.0368	0.693591	0.877053
SMAP1	chr6_70798667	cg03059183	-0.0318122	1.82645	0.473469	0.729332
SMAP1	chr6_70798667	cg04086834	-0.0686616	1.12104	0.267762	0.533444
SMAP1	chr6_70798667	cg09008753	0.0347661	-1.34698	0.105599	0.311808
SMAP1	chr6_70798667	cg09319621	0.0130475	-1.34424	0.602371	0.819617
SMAP1	chr6_70798667	cg11078358	0.0327981	-2.99862	0.429089	0.688475
SMAP1	chr6_70798667	cg11196751	-0.0296176	-2.21825	0.500998	0.753294
SMAP1	chr6_70798667	cg11275580	-0.0271084	1.25941	0.544685	0.785032
SMAP1	chr6_70798667	cg12545949	-0.00763213	1.07399	0.861808	0.949581
SMAP1	chr6_70798667	cg13611783	0.0434485	-0.970619	0.000959922	0.0108267
SMAP1	chr6_70798667	cg13976799	-0.0161799	1.37286	0.769241	0.903083
SMAP1	chr6_70798667	cg17052816	-0.00961764	-0.200299	0.655201	0.860181
SMAP1	chr6_70798667	cg18051552	-0.0854627	1.5272	0.223916	0.486542
SMAP1	chr6_70798667	cg21039196	-0.0180226	1.2432	0.646788	0.853947
SMAP1	chr6_70798667	cg22716127	0.0316446	-1.10921	0.0845453	0.266963
SMAP1	chr6_70798667	cg23069120	0.0229264	0.749701	0.579195	0.809195
SMAP1	chr6_70798667	cg24161594	0.018704	-0.853135	0.396432	0.661825
SMAP1	chr6_70798667	cg24503257	-0.03662	-1.56615	0.363622	0.632944
SMAP1	chr6_70798667	cg27637018	-0.0158787	-2.74813	0.749372	0.892843
CAMK2D	chr4_113661778	cg00133698	0.00786153	-1.23035	0.603575	0.82012
CAMK2D	chr4_113661778	cg00247361	-0.0325828	1.76525	0.361382	0.630289
CAMK2D	chr4_113661778	cg00417692	-0.0336487	1.80386	0.31785	0.588487
CAMK2D	chr4_113661778	cg01021724	0.00299759	-0.869478	0.872257	0.951203
CAMK2D	chr4_113661778	cg02379856	-0.00246752	0.232593	0.924429	0.967839
CAMK2D	chr4_113661778	cg02739013	0.00610245	-0.501174	0.757154	0.895867
CAMK2D	chr4_113661778	cg05257260	0.0617658	0.50918	0.104654	0.310499
CAMK2D	chr4_113661778	cg06633243	-0.0210057	0.738244	0.595847	0.817416
CAMK2D	chr4_113661778	cg07082158	0.00098691	-1.62609	0.977331	0.990857
CAMK2D	chr4_113661778	cg07795325	0.0177934	0.291992	0.302176	0.572216
CAMK2D	chr4_113661778	cg12883826	-0.0308113	-0.858147	0.100874	0.303925
CAMK2D	chr4_113661778	cg13076329	-0.0199103	-0.629876	0.472617	0.729115
CAMK2D	chr4_113661778	cg13246654	-0.0186632	-1.23612	0.463234	0.721848
CAMK2D	chr4_113661778	cg13801347	0.015598	0.644133	0.521012	0.771393
CAMK2D	chr4_113661778	cg13975660	0.00127653	-0.48831	0.945678	0.979326
CAMK2D	chr4_113661778	cg14318942	-0.000519681	-0.908696	0.987865	0.996414
CAMK2D	chr4_113661778	cg15525489	0.0354549	-0.98124	0.152384	0.391495
CAMK2D	chr4_113661778	cg16503611	-0.0521657	1.41458	0.222558	0.485236
CAMK2D	chr4_113661778	cg17025741	0.0730282	-1.12419	0.0345218	0.1435
CAMK2D	chr4_113661778	cg17237111	0.0269639	-0.614306	0.0353874	0.145873
CAMK2D	chr4_113661778	cg17244462	0.0026694	-1.33801	0.937628	0.973705
CAMK2D	chr4_113661778	cg18841746	0.00581818	-0.664616	0.746048	0.892196
CAMK2D	chr4_113661778	cg20028233	-0.0133618	-0.561324	0.615693	0.831455
CAMK2D	chr4_113661778	cg20391984	-0.00220713	-0.950537	0.917767	0.965902
CAMK2D	chr4_113661778	cg23670529	0.0133741	1.07846	0.73394	0.88891
CAMK2D	chr4_113661778	cg23888462	-0.0432729	-2.12298	0.417447	0.679145
CAMK2D	chr4_113661778	cg24071500	-0.00689813	-0.943142	0.660037	0.862555
CAMK2D	chr4_113661778	cg26177041	-0.025965	0.363458	0.243754	0.506471
CAMK2D	chr4_113661778	cg26563814	-0.00347085	0.941155	0.922477	0.966979
TAFA5	chr22_48750155	cg00147509	-0.153305	0.489738	0.119982	0.335113
TAFA5	chr22_48750155	cg00223715	-0.0769083	0.509255	0.432122	0.69118
TAFA5	chr22_48750155	cg00286513	-0.159892	1.29933	0.486942	0.73979
TAFA5	chr22_48750155	cg00373397	-0.0136846	0.60468	0.945735	0.979326
TAFA5	chr22_48750155	cg00444884	-0.0902654	0.305717	0.451044	0.709696
TAFA5	chr22_48750155	cg00481629	-0.218962	0.715488	0.255799	0.522839
TAFA5	chr22_48750155	cg00743803	0.0776709	0.0838527	0.728734	0.88811
TAFA5	chr22_48750155	cg01216108	-0.258246	1.39077	0.183341	0.430088
TAFA5	chr22_48750155	cg01616797	-0.0234148	0.305172	0.890156	0.953765
TAFA5	chr22_48750155	cg01730859	0.0174469	-0.0361728	0.882332	0.951203
TAFA5	chr22_48750155	cg01816146	-0.0322205	0.651584	0.914474	0.964108
TAFA5	chr22_48750155	cg02420032	-0.0529943	0.468451	0.712177	0.881829
TAFA5	chr22_48750155	cg02582669	-0.0568868	0.611633	0.712961	0.881829
TAFA5	chr22_48750155	cg02895639	-0.317415	1.21304	0.171413	0.414889
TAFA5	chr22_48750155	cg02905830	-0.503053	1.78984	0.0518078	0.190036
TAFA5	chr22_48750155	cg03196739	-0.389959	2.12141	0.0565097	0.203785
TAFA5	chr22_48750155	cg03312805	-0.352738	1.49404	0.164459	0.406827
TAFA5	chr22_48750155	cg03440540	-0.156189	0.932507	0.338197	0.607665
TAFA5	chr22_48750155	cg04012844	0.0652674	0.442038	0.824095	0.93206
TAFA5	chr22_48750155	cg04198308	-0.552303	1.68998	0.205884	0.464714
TAFA5	chr22_48750155	cg04302775	0.109219	-0.287068	0.46865	0.724584
TAFA5	chr22_48750155	cg04304705	-0.0854475	0.426481	0.668477	0.865644
TAFA5	chr22_48750155	cg04377908	-0.0986818	0.607673	0.276643	0.542703
TAFA5	chr22_48750155	cg04382374	-0.00373878	0.310207	0.984112	0.994977
TAFA5	chr22_48750155	cg04478606	0.0281916	0.71998	0.910845	0.962946
TAFA5	chr22_48750155	cg04493000	-0.106483	0.711218	0.796775	0.917437
TAFA5	chr22_48750155	cg04930211	0.00687962	0.26768	0.969494	0.988776
TAFA5	chr22_48750155	cg04970014	-0.128016	0.769301	0.155247	0.395679
TAFA5	chr22_48750155	cg05006211	-0.0246027	0.245832	0.776128	0.906828
TAFA5	chr22_48750155	cg05072413	0.0734805	-0.347624	0.416729	0.678408
TAFA5	chr22_48750155	cg05155289	-0.0350587	0.491041	0.782679	0.910506
TAFA5	chr22_48750155	cg05532594	-0.0510922	0.911456	0.854077	0.946667
TAFA5	chr22_48750155	cg05992904	-0.116303	0.609548	0.465739	0.72273
TAFA5	chr22_48750155	cg06273376	-0.224972	0.682708	0.308291	0.578997
TAFA5	chr22_48750155	cg06340899	-0.108083	0.671549	0.262373	0.530122
TAFA5	chr22_48750155	cg06937832	-0.202749	1.07336	0.107814	0.315277
TAFA5	chr22_48750155	cg07142833	-0.0765814	0.846904	0.616111	0.831455
TAFA5	chr22_48750155	cg07305859	-0.0938615	0.983621	0.764703	0.900036
TAFA5	chr22_48750155	cg07416315	0.17758	0.558824	0.629895	0.840735
TAFA5	chr22_48750155	cg07900958	-0.154617	0.873705	0.289485	0.554636
TAFA5	chr22_48750155	cg07959986	-0.0440427	0.200283	0.734567	0.88925
TAFA5	chr22_48750155	cg08719296	0.158488	-0.15471	0.592592	0.816108
TAFA5	chr22_48750155	cg08760753	0.247036	-0.480583	0.306661	0.576874
TAFA5	chr22_48750155	cg10902101	-0.223428	1.29359	0.502408	0.753294
TAFA5	chr22_48750155	cg11168293	0.0848074	-0.192895	0.629318	0.840402
TAFA5	chr22_48750155	cg11352418	-0.365116	1.1932	0.060919	0.215443
TAFA5	chr22_48750155	cg11403706	0.0959248	0.843289	0.741055	0.889958
TAFA5	chr22_48750155	cg12454595	-0.0330165	0.581841	0.739102	0.889958
TAFA5	chr22_48750155	cg12502098	-0.319865	1.82253	0.394753	0.65981
TAFA5	chr22_48750155	cg12539917	-0.0308184	0.297986	0.708658	0.881829
TAFA5	chr22_48750155	cg12986453	0.0565125	-0.124194	0.754752	0.895089
TAFA5	chr22_48750155	cg13868165	-0.0430918	-0.11201	0.683067	0.873583
TAFA5	chr22_48750155	cg13872278	-0.0507603	0.336888	0.673385	0.867181
TAFA5	chr22_48750155	cg14026113	-0.152856	0.763883	0.130866	0.354694
TAFA5	chr22_48750155	cg14263779	-0.101313	0.795849	0.685764	0.874764
TAFA5	chr22_48750155	cg14517004	-0.287292	1.37421	0.319784	0.590724
TAFA5	chr22_48750155	cg14596108	0.110767	-0.205186	0.695519	0.877346
TAFA5	chr22_48750155	cg14894848	-0.0958122	0.491945	0.541337	0.7817
TAFA5	chr22_48750155	cg14984160	-0.020714	0.377851	0.784619	0.910777
TAFA5	chr22_48750155	cg15187790	-0.179438	0.653216	0.0672845	0.229412
TAFA5	chr22_48750155	cg15271942	0.0152156	1.32764	0.964502	0.986431
TAFA5	chr22_48750155	cg15665276	-0.090427	0.507255	0.589374	0.8142
TAFA5	chr22_48750155	cg15977904	-0.042109	0.320149	0.719718	0.885812
TAFA5	chr22_48750155	cg16243558	0.162509	-0.369617	0.216005	0.476481
TAFA5	chr22_48750155	cg16609342	-0.169512	0.650018	0.0422401	0.166588
TAFA5	chr22_48750155	cg18013185	0.161171	-0.0822343	0.686015	0.874764
TAFA5	chr22_48750155	cg18865274	-0.0383512	0.586012	0.831185	0.936765
TAFA5	chr22_48750155	cg19030607	-0.0819716	0.30219	0.481343	0.734622
TAFA5	chr22_48750155	cg19122206	-0.19737	0.895955	0.130168	0.353464
TAFA5	chr22_48750155	cg19203800	0.0392842	0.64584	0.927574	0.969332
TAFA5	chr22_48750155	cg19734830	-0.206758	1.17958	0.200776	0.456031
TAFA5	chr22_48750155	cg19949853	-0.067857	0.602805	0.661952	0.863036
TAFA5	chr22_48750155	cg20503649	-0.0137622	0.741838	0.952795	0.982295
TAFA5	chr22_48750155	cg20640347	0.103727	-0.159107	0.473726	0.729332
TAFA5	chr22_48750155	cg21177778	-0.162404	0.829947	0.280826	0.546726
TAFA5	chr22_48750155	cg21564495	-0.0714102	0.36113	0.38144	0.647893
TAFA5	chr22_48750155	cg22504180	-0.154037	1.86649	0.680616	0.87255
TAFA5	chr22_48750155	cg22643811	-0.140573	0.56061	0.499851	0.753294
TAFA5	chr22_48750155	cg22682460	-0.0656196	0.702898	0.73552	0.889634
TAFA5	chr22_48750155	cg22881033	-0.0890082	0.482807	0.442443	0.701561
TAFA5	chr22_48750155	cg22989103	-0.371311	1.03311	0.313399	0.583132
TAFA5	chr22_48750155	cg23332586	-0.0788308	0.791586	0.699552	0.878004
TAFA5	chr22_48750155	cg23400715	-0.0754888	0.201539	0.704201	0.879219
TAFA5	chr22_48750155	cg23678800	-0.0354884	-0.106518	0.643073	0.851674
TAFA5	chr22_48750155	cg23902471	-0.000165677	0.201736	0.998664	0.99954
TAFA5	chr22_48750155	cg23936463	-0.130579	0.469642	0.34658	0.616249
TAFA5	chr22_48750155	cg24222175	-0.082516	0.935864	0.726993	0.88811
TAFA5	chr22_48750155	cg24343361	-0.0517829	0.0283527	0.616686	0.831455
TAFA5	chr22_48750155	cg25338000	0.0267471	0.0690249	0.834252	0.937276
TAFA5	chr22_48750155	cg25975712	-0.408251	1.2295	0.254236	0.521489
TAFA5	chr22_48750155	cg26120340	-0.0458725	0.875893	0.88778	0.953682
TAFA5	chr22_48750155	cg26700320	0.133086	-0.18762	0.679782	0.87255
TAFA5	chr22_48750155	cg27308329	-0.381838	1.14763	0.408655	0.67209
TAFA5	chr22_48750155	cg27309229	0.0244152	1.1362	0.955115	0.983895
TAFA5	chr22_48750155	cg27652464	-0.130895	0.29035	0.509511	0.758645
TAFA5	chr22_48750155	ch_22_47579720R	0.0114093	-0.363492	0.83957	0.939927
RBM6	chr3_50061561	cg00150418	-0.011665	1.82526	0.174393	0.417502
RBM6	chr3_50061561	cg02060096	0.00324514	-0.700435	0.578575	0.809195
RBM6	chr3_50061561	cg02255918	-0.0109958	1.23678	0.170771	0.414245
RBM6	chr3_50061561	cg04436474	0.0118618	-0.76339	1.90505e-05	0.000525219
RBM6	chr3_50061561	cg04485516	-0.00695779	1.41039	0.530872	0.774889
RBM6	chr3_50061561	cg04876606	0.00704883	-1.81272	0.232613	0.495925
RBM6	chr3_50061561	cg05623727	-0.00286004	0.136164	0.712496	0.881829
RBM6	chr3_50061561	cg05635617	0.0138704	-0.63496	0.000249355	0.00397109
RBM6	chr3_50061561	cg05654648	0.0117025	-0.674478	0.000355771	0.00513579
RBM6	chr3_50061561	cg07808960	0.00455794	-1.0434	0.241909	0.506415
RBM6	chr3_50061561	cg07889826	0.00800228	-1.2513	0.161285	0.403843
RBM6	chr3_50061561	cg09407916	0.0091439	-0.939088	0.0275766	0.12088
RBM6	chr3_50061561	cg09687332	0.0425953	-2.51033	0.0112031	0.0661862
RBM6	chr3_50061561	cg09712216	-0.00881719	-1.53071	0.327175	0.598278
RBM6	chr3_50061561	cg10928302	0.00955512	-1.20074	0.0490463	0.184391
RBM6	chr3_50061561	cg12257692	0.0191808	-0.0350967	0.0721703	0.239695
RBM6	chr3_50061561	cg12444340	0.00176777	-0.974958	0.791244	0.914263
RBM6	chr3_50061561	cg12837697	0.0114976	-0.788285	0.000414784	0.00578421
RBM6	chr3_50061561	cg12905688	0.00963242	-1.25016	0.2419	0.506415
RBM6	chr3_50061561	cg14634738	0.00588791	-0.586463	0.120691	0.335631
RBM6	chr3_50061561	cg15146556	-0.00916156	-2.1064	0.484315	0.737839
RBM6	chr3_50061561	cg18097555	0.0157771	-0.84359	5.40989e-06	0.000173387
RBM6	chr3_50061561	cg18683875	0.01892	-2.00007	0.0599304	0.213071
RBM6	chr3_50061561	cg19139554	0.00176441	-1.38027	0.654974	0.860181
RBM6	chr3_50061561	cg21729847	0.0105541	-0.950264	0.120607	0.335631
RBM6	chr3_50061561	cg21837569	0.00870325	-0.355022	0.0130535	0.0737206
RBM6	chr3_50061561	cg22135160	0.00758328	-0.992591	0.120951	0.335991
RBM6	chr3_50061561	cg22594323	0.0111826	-1.6367	0.00129895	0.0133682
RBM6	chr3_50061561	cg23625931	-0.00344144	-1.60981	0.742996	0.890117
RBM6	chr3_50061561	cg23665729	0.0130364	-1.96928	0.0888224	0.276049
RBM6	chr3_50061561	cg24110177	0.0151972	-1.15686	0.00593877	0.0421801
RBM6	chr3_50061561	cg26278370	0.00497415	-0.656337	0.236022	0.500346
RBM6	chr3_50061561	cg26343910	-0.0309942	0.926447	0.0314502	0.133815
RBM6	chr3_50061561	cg27282641	-0.00590776	1.02903	0.528782	0.774889
RBM6	chr3_50061561	ch_3_1075622R	0.014619	-1.10493	0.0184291	0.0931994
HDAC2	chr6_113970938	cg00161229	-0.0586367	-0.742362	0.289132	0.554477
HDAC2	chr6_113970938	cg00930213	0.0209556	-0.895029	0.727753	0.88811
HDAC2	chr6_113970938	cg01129566	-0.105973	0.305783	0.0580908	0.207733
HDAC2	chr6_113970938	cg02275213	-0.0329766	1.25481	0.66555	0.864347
HDAC2	chr6_113970938	cg08198132	0.021647	-1.62358	0.73734	0.889958
HDAC2	chr6_113970938	cg10999867	0.00561533	-1.13544	0.90155	0.95932
HDAC2	chr6_113970938	cg11276600	0.113945	-0.900026	0.256322	0.522839
HDAC2	chr6_113970938	cg12772418	0.0298847	-0.642954	0.611857	0.829176
HDAC2	chr6_113970938	cg13393754	0.0689324	-2.39975	0.298892	0.567254
HDAC2	chr6_113970938	cg15005908	0.109923	-2.50874	0.16615	0.408445
HDAC2	chr6_113970938	cg15069235	0.245205	-1.65993	0.0896727	0.277771
HDAC2	chr6_113970938	cg15242771	0.00401851	-1.88345	0.961135	0.986135
HDAC2	chr6_113970938	cg18387216	-0.0999279	-1.06042	0.292087	0.557641
HDAC2	chr6_113970938	cg18674783	-0.0735213	0.23983	0.0678627	0.230769
HDAC2	chr6_113970938	cg22867643	0.104424	-2.07311	0.0225334	0.106235
HDAC2	chr6_113970938	cg23624957	-0.0252725	0.633166	0.840691	0.939927
HDAC2	chr6_113970938	cg24023618	-0.0235602	-0.358492	0.693771	0.877053
HDAC2	chr6_113970938	cg27302007	-0.0585938	-0.275443	0.568137	0.801267
ASPH	chr8_61579910	cg00168967	-0.0142928	0.750191	0.372285	0.638488
ASPH	chr8_61583863	cg00168967	-0.0474985	1.51849	0.00247511	0.0219542
ASPH	chr8_61579910	cg00343433	-0.00673714	0.606362	0.680113	0.87255
ASPH	chr8_61583863	cg00343433	-0.0328866	1.19757	0.0267016	0.118039
ASPH	chr8_61579910	cg01141645	-0.00902844	0.421651	0.475969	0.730331
ASPH	chr8_61583863	cg01141645	0.00143473	0.490934	0.911981	0.962946
ASPH	chr8_61579910	cg02080319	-0.0033377	0.603561	0.826313	0.933927
ASPH	chr8_61583863	cg02080319	-0.00318264	0.971803	0.817508	0.928296
ASPH	chr8_61579910	cg03961580	0.00861022	0.771626	0.661025	0.863036
ASPH	chr8_61583863	cg03961580	-0.00293722	1.43278	0.867128	0.951203
ASPH	chr8_61579910	cg04333463	0.0048228	-0.785394	0.410464	0.674202
ASPH	chr8_61583863	cg04333463	0.00759871	-1.20915	0.19496	0.447519
ASPH	chr8_61579910	cg04619120	-0.00973223	0.73541	0.524369	0.773136
ASPH	chr8_61583863	cg04619120	-0.0264595	1.31267	0.0729489	0.241486
ASPH	chr8_61579910	cg04958191	-0.0134356	0.719025	0.410917	0.674513
ASPH	chr8_61583863	cg04958191	-0.00253068	0.989257	0.882596	0.951203
ASPH	chr8_61579910	cg05142030	-0.00899417	0.750798	0.57945	0.809195
ASPH	chr8_61583863	cg05142030	-0.0197649	1.24902	0.197601	0.451558
ASPH	chr8_61579910	cg05260469	-0.00130819	-0.130071	0.894422	0.955259
ASPH	chr8_61583863	cg05260469	-0.0165295	0.0308353	0.0801543	0.257216
ASPH	chr8_61579910	cg05696731	-0.0351145	1.5595	0.0591365	0.210885
ASPH	chr8_61583863	cg05696731	-0.0336814	1.97925	0.0338672	0.141564
ASPH	chr8_61579910	cg06068338	-0.0107755	0.838429	0.45983	0.719344
ASPH	chr8_61583863	cg06068338	-0.0301334	1.55247	0.0624158	0.219225
ASPH	chr8_61579910	cg06251670	-0.00461818	0.413663	0.662424	0.863036
ASPH	chr8_61583863	cg06251670	-0.0163709	0.828383	0.124946	0.342889
ASPH	chr8_61579910	cg06619076	0.0160382	-0.664257	0.00607197	0.0429331
ASPH	chr8_61583863	cg06619076	0.022355	-1.0515	0.000204927	0.00330461
ASPH	chr8_61579910	cg07118376	0.018175	-0.322922	0.252711	0.518776
ASPH	chr8_61583863	cg07118376	0.0161091	-0.342604	0.318114	0.588487
ASPH	chr8_61579910	cg07538204	-0.00744972	0.329867	0.532163	0.774889
ASPH	chr8_61583863	cg07538204	-0.011326	0.466945	0.29056	0.555552
ASPH	chr8_61579910	cg08236468	-0.00157883	-0.897878	0.828263	0.934712
ASPH	chr8_61583863	cg08236468	0.00128771	-1.40087	0.875073	0.951203
ASPH	chr8_61579910	cg08289323	-0.011677	0.999999	0.531219	0.774889
ASPH	chr8_61583863	cg08289323	0.00313391	1.37905	0.858363	0.947823
ASPH	chr8_61579910	cg10584100	0.00461576	0.313075	0.875908	0.951203
ASPH	chr8_61583863	cg10584100	-0.0114641	0.468494	0.699066	0.878004
ASPH	chr8_61579910	cg10606061	-0.0172026	1.09097	0.384078	0.648732
ASPH	chr8_61583863	cg10606061	-0.0305502	1.66906	0.111013	0.319025
ASPH	chr8_61579910	cg10940942	-0.0219279	1.27152	0.218889	0.480096
ASPH	chr8_61583863	cg10940942	-0.0204451	1.68452	0.213057	0.472696
ASPH	chr8_61579910	cg11390489	-0.0577439	1.33083	0.0146983	0.0797767
ASPH	chr8_61583863	cg11390489	-0.0799227	1.81003	0.000880326	0.0103067
ASPH	chr8_61579910	cg12817389	0.0184583	-0.319285	0.0202919	0.0987256
ASPH	chr8_61583863	cg12817389	0.0153419	-0.281543	0.0502162	0.186161
ASPH	chr8_61579910	cg13579374	0.0174655	-0.633493	0.000926363	0.0106035
ASPH	chr8_61583863	cg13579374	0.0169764	-0.874508	0.00182984	0.017638
ASPH	chr8_61579910	cg13893459	0.0184791	0.216138	0.160968	0.403443
ASPH	chr8_61583863	cg13893459	-0.00744805	0.794401	0.499608	0.753294
ASPH	chr8_61579910	cg14266248	0.000670993	0.295198	0.921163	0.966596
ASPH	chr8_61583863	cg14266248	-0.0115835	0.668205	0.0871753	0.273249
ASPH	chr8_61579910	cg14405873	-0.0139253	-0.989842	0.194891	0.447519
ASPH	chr8_61583863	cg14405873	-0.0249395	-1.50269	0.0370768	0.151974
ASPH	chr8_61579910	cg15079268	0.0187842	-0.752151	0.00135722	0.0137546
ASPH	chr8_61583863	cg15079268	0.0249773	-1.10057	0.000102353	0.00193138
ASPH	chr8_61579910	cg16050784	0.00837941	-0.475349	0.13837	0.36918
ASPH	chr8_61583863	cg16050784	0.00787293	-0.649423	0.206076	0.464714
ASPH	chr8_61579910	cg17066716	0.000548057	-1.3372	0.965035	0.986583
ASPH	chr8_61583863	cg17066716	-0.00669529	-2.00247	0.600511	0.8188
ASPH	chr8_61579910	cg18006411	0.0134845	0.446101	0.338646	0.608044
ASPH	chr8_61583863	cg18006411	-0.00369029	1.02272	0.787622	0.912133
ASPH	chr8_61579910	cg18893025	-0.00871133	0.688712	0.592665	0.816108
ASPH	chr8_61583863	cg18893025	0.00442618	1.10981	0.774854	0.906828
ASPH	chr8_61579910	cg20903136	-0.0259796	1.137	0.143868	0.377262
ASPH	chr8_61583863	cg20903136	-0.0315157	1.62574	0.0465168	0.177748
ASPH	chr8_61579910	cg25080348	-0.00882014	0.711431	0.48977	0.7435
ASPH	chr8_61583863	cg25080348	-0.0103859	1.1872	0.411756	0.675028
ERAP1	chr5_96783818	cg00188032	0.0311696	-0.412315	0.00825346	0.0530373
ERAP1	chr5_96783818	cg01142811	-0.0038485	-0.0930177	0.342388	0.611856
ERAP1	chr5_96783818	cg01952144	-0.00248356	-1.3447	0.662926	0.863251
ERAP1	chr5_96783818	cg05466640	0.00179276	-1.38367	0.762951	0.900036
ERAP1	chr5_96783818	cg05806375	-0.00319819	-0.286096	0.172453	0.415572
ERAP1	chr5_96783818	cg06832861	-0.00595212	0.956266	0.388579	0.653751
ERAP1	chr5_96783818	cg08618451	-0.0112223	0.904938	0.517314	0.767604
ERAP1	chr5_96783818	cg08783793	-0.000684633	-1.30204	0.858127	0.947823
ERAP1	chr5_96783818	cg09513877	0.00968942	0.539346	0.615514	0.831455
ERAP1	chr5_96783818	cg09882587	-0.00446705	-0.349235	0.0843853	0.266891
ERAP1	chr5_96783818	cg12596782	0.0129387	-1.5026	0.056154	0.203353
ERAP1	chr5_96783818	cg14161426	0.00100565	-1.54243	0.857772	0.947823
ERAP1	chr5_96783818	cg16020556	0.000800028	0.85063	0.928112	0.969332
ERAP1	chr5_96783818	cg16138854	0.00200629	-1.87619	0.755628	0.895301
ERAP1	chr5_96783818	cg16492584	0.0164256	1.23584	0.11838	0.332087
ERAP1	chr5_96783818	cg17330273	-0.00139097	1.07572	0.886766	0.953319
ERAP1	chr5_96783818	cg17522249	-0.00359286	-0.499449	0.433774	0.692526
ERAP1	chr5_96783818	cg23215014	-0.00108213	-1.74237	0.863496	0.950624
ERAP1	chr5_96783818	cg24705254	-0.00787988	1.02235	0.321004	0.59085
NTAQ1	chr8_123436665	cg00194681	0.0187589	-1.2353	0.013273	0.0747217
NTAQ1	chr8_123436665	cg01000365	0.016046	-1.00044	0.00852854	0.054396
NTAQ1	chr8_123436665	cg07088351	-0.0127696	1.27445	0.336745	0.607143
NTAQ1	chr8_123436665	cg08573893	0.0169912	-0.852463	0.0424975	0.166866
NTAQ1	chr8_123436665	cg10063407	-0.0104012	0.0842172	0.580356	0.809195
NTAQ1	chr8_123436665	cg11979618	-0.0150604	1.58079	0.381919	0.647893
NTAQ1	chr8_123436665	cg12108555	0.0113231	-0.0321188	0.317021	0.588487
NTAQ1	chr8_123436665	cg12646585	0.0106134	-0.565846	0.121317	0.336642
NTAQ1	chr8_123436665	cg13177214	-0.00568607	-1.59616	0.532202	0.774889
NTAQ1	chr8_123436665	cg14018100	0.0144401	-1.05122	0.0527114	0.193074
NTAQ1	chr8_123436665	cg18893514	-0.0325733	1.69679	0.0260884	0.116374
NTAQ1	chr8_123436665	cg19197523	0.00985341	-0.926424	0.244571	0.507346
NTAQ1	chr8_123436665	cg21495321	-0.0120283	-0.242918	0.0785671	0.254426
NTAQ1	chr8_123436665	cg23412309	0.00288988	-1.4671	0.731798	0.88811
THRB	chr3_24228922	cg00207794	-0.100653	1.6462	0.0260979	0.116374
THRB	chr3_24228922	cg00323305	-0.0187699	-0.78181	0.845981	0.942675
THRB	chr3_24228922	cg00688963	0.00130788	-1.40394	0.959957	0.986135
THRB	chr3_24228922	cg00700241	-0.0360749	0.726628	0.398493	0.663465
THRB	chr3_24228922	cg01165683	0.0113125	-0.363889	0.701797	0.879219
THRB	chr3_24228922	cg01190276	0.0308683	-0.253034	0.254847	0.521907
THRB	chr3_24228922	cg01536744	-0.188737	2.45681	0.00101172	0.0110857
THRB	chr3_24228922	cg02333852	-0.00275819	-0.988296	0.913937	0.963938
THRB	chr3_24228922	cg03201166	-0.0107266	0.144058	0.859068	0.947862
THRB	chr3_24228922	cg03287940	-0.0973828	0.389079	0.144839	0.378633
THRB	chr3_24228922	cg04928005	-0.0493573	-1.23201	0.238463	0.504056
THRB	chr3_24228922	cg07581492	0.00893764	1.14702	0.807333	0.923486
THRB	chr3_24228922	cg07647822	0.00814553	-0.303067	0.558987	0.792285
THRB	chr3_24228922	cg09805010	-0.065408	-0.578433	0.0861247	0.270481
THRB	chr3_24228922	cg12258785	-0.0600319	0.228417	0.127989	0.348739
THRB	chr3_24228922	cg12306156	0.0235528	-1.45005	0.270987	0.535293
THRB	chr3_24228922	cg12405742	-0.0738379	0.546036	0.020011	0.0979162
THRB	chr3_24228922	cg13075600	-0.0124101	1.24701	0.806037	0.923449
THRB	chr3_24228922	cg13518327	-0.0915044	0.33321	0.00126822	0.01318
THRB	chr3_24228922	cg13790603	0.00161466	-0.94868	0.966937	0.986588
THRB	chr3_24228922	cg15359321	0.13404	-0.823494	0.00776899	0.0512075
THRB	chr3_24228922	cg15385623	0.0386754	-0.709337	4.95042e-05	0.00110373
THRB	chr3_24228922	cg16579438	-0.0405115	0.193985	0.130168	0.353464
THRB	chr3_24228922	cg17944741	0.207437	-1.43439	0.000116495	0.00213352
THRB	chr3_24228922	cg18266594	0.135302	-1.05361	0.000985016	0.0109688
THRB	chr3_24228922	cg18784113	0.0793093	-0.679034	0.0386908	0.156226
THRB	chr3_24228922	cg19224787	0.17427	-0.568451	0.00132502	0.0135353
THRB	chr3_24228922	cg19763108	0.0662724	-0.508931	0.0555816	0.202431
THRB	chr3_24228922	cg20985755	0.00591127	-1.31727	0.878792	0.951203
THRB	chr3_24228922	cg21069176	0.069826	-0.850524	0.0311351	0.133273
THRB	chr3_24228922	cg21303011	0.0416627	-1.04351	0.333244	0.603856
THRB	chr3_24228922	cg22132013	0.0243295	0.885606	0.566198	0.799852
THRB	chr3_24228922	cg22842189	0.293256	-2.31912	1.23388e-07	6.59099e-06
THRB	chr3_24228922	cg22892432	-0.0273498	1.15992	0.550288	0.78765
THRB	chr3_24228922	cg23049130	0.427899	-3.61586	3.92434e-10	3.87e-08
THRB	chr3_24228922	cg23234832	-0.00991478	-1.20168	0.696837	0.877549
THRB	chr3_24228922	cg24120841	0.0341594	-0.856094	0.0158801	0.0841253
THRB	chr3_24228922	cg24962827	0.023568	-0.249796	0.286385	0.550857
THRB	chr3_24228922	cg25087352	0.127299	-0.503509	0.00501061	0.0372383
THRB	chr3_24228922	cg25336332	-0.132141	0.855077	0.00566736	0.0408177
THRB	chr3_24228922	cg25829666	0.0348322	-1.83956	0.11132	0.319025
THRB	chr3_24228922	cg26139133	0.0275281	-1.45081	0.14616	0.380075
THRB	chr3_24228922	cg26146027	0.010199	-1.32549	0.720881	0.885917
THRB	chr3_24228922	cg26160218	-0.0253912	0.481832	0.704335	0.879219
THRB	chr3_24228922	cg27388911	0.00579258	-0.207529	0.687786	0.875214
THRB	chr3_24228922	cg27526665	0.0219048	-0.589506	0.0604568	0.2144
THRB	chr3_24228922	cg27622506	-0.0199207	-0.78657	0.696334	0.877346
TESPA1	chr12_54961093	cg00240653	0.0353744	0.323165	0.598576	0.8188
TESPA1	chr12_54961093	cg01874152	-0.043011	1.40609	0.554739	0.791514
TESPA1	chr12_54961093	cg02554168	0.149315	-1.84549	0.0225397	0.106235
TESPA1	chr12_54961093	cg02710015	-0.0178471	0.347264	0.751355	0.892843
TESPA1	chr12_54961093	cg07880109	0.0690793	-0.78998	0.0819334	0.261299
TESPA1	chr12_54961093	cg08829007	0.0727098	-0.693642	0.0672049	0.229412
TESPA1	chr12_54961093	cg15961105	-0.0460003	0.452491	0.109546	0.316659
TESPA1	chr12_54961093	cg16447680	0.0416857	-0.635118	0.211996	0.472248
TESPA1	chr12_54961093	cg16903782	0.120263	-1.53309	0.0599989	0.213071
TESPA1	chr12_54961093	cg17881208	0.117606	-1.06805	0.011404	0.0669104
TESPA1	chr12_54961093	cg19219778	0.127963	-1.07962	0.0179005	0.0914282
TESPA1	chr12_54961093	cg22688241	0.0777762	-0.370724	0.219657	0.481349
TESPA1	chr12_54961093	cg24536818	0.0624781	-0.182371	0.181367	0.426238
TESPA1	chr12_54961093	cg25486399	0.0202917	0.59079	0.751465	0.892843
RNLS	chr10_88274911	cg00281100	0.011068	0.596239	0.862967	0.95045
RNLS	chr10_88274911	cg02977388	-0.0585138	0.845046	0.329444	0.601173
RNLS	chr10_88274911	cg04088524	0.0219375	1.02735	0.707228	0.881572
RNLS	chr10_88274911	cg04812509	-0.414877	4.16406	0.000146943	0.002501
RNLS	chr10_88274911	cg05038152	0.199908	-1.748	0.000904196	0.0104431
RNLS	chr10_88274911	cg05339066	-0.442979	4.45243	0.000649055	0.008047
RNLS	chr10_88274911	cg05529156	0.0174588	0.0863315	0.726259	0.88811
RNLS	chr10_88274911	cg05645316	0.113759	-0.608079	0.194522	0.447519
RNLS	chr10_88274911	cg06079710	-0.295864	3.22604	0.000239576	0.00383921
RNLS	chr10_88274911	cg06118999	-0.332257	3.41604	3.50953e-05	0.000825544
RNLS	chr10_88274911	cg06210915	0.274952	-1.97851	0.00036842	0.00527726
RNLS	chr10_88274911	cg06981182	-0.358391	3.68925	0.000290636	0.00446222
RNLS	chr10_88274911	cg09721144	-0.0276023	0.438513	0.443555	0.702456
RNLS	chr10_88274911	cg10048212	0.0168003	1.05712	0.816854	0.927964
RNLS	chr10_88274911	cg11861709	-0.249808	2.52672	0.000988461	0.0109688
RNLS	chr10_88274911	cg15661332	-0.345857	3.6797	0.000202499	0.00330461
RNLS	chr10_88274911	cg15972243	-0.183639	2.06672	0.0276947	0.121176
RNLS	chr10_88274911	cg16503585	-0.0287097	1.21087	0.623066	0.835914
RNLS	chr10_88274911	cg17766305	-0.088743	0.845013	0.0509459	0.18795
RNLS	chr10_88274911	cg18192294	-0.635048	6.36248	8.18369e-05	0.00162659
RNLS	chr10_88274911	cg19235339	-0.422965	4.21653	0.000744199	0.00908631
RNLS	chr10_88274911	cg20124336	-0.0234719	1.15675	0.728998	0.88811
RNLS	chr10_88274911	cg23126166	-0.0162449	0.198375	0.728782	0.88811
RNLS	chr10_88274911	cg23548670	0.151811	-1.12247	0.00716545	0.0482211
RNLS	chr10_88274911	cg23809813	-0.0219602	0.40353	0.658128	0.861263
RNLS	chr10_88274911	cg26003023	0.0732293	0.0622167	0.164884	0.406971
RNLS	chr10_88274911	cg26464186	0.154721	-0.609783	0.0255918	0.115524
TFAP2C	chr20_56638265	cg00297721	0.0512172	-0.264135	0.0455021	0.17544
TFAP2C	chr20_56638265	cg00682734	0.0521053	-0.249283	0.0685469	0.232787
TFAP2C	chr20_56638265	cg01270206	0.116753	-0.712168	0.0143932	0.0788551
TFAP2C	chr20_56638265	cg02718825	0.0121125	0.123443	0.739354	0.889958
TFAP2C	chr20_56638265	cg03201044	0.0398869	-0.44723	0.320603	0.59085
TFAP2C	chr20_56638265	cg03216529	0.0185416	-0.510797	0.411537	0.675028
TFAP2C	chr20_56638265	cg04606210	-0.0564084	0.0859115	0.140973	0.372633
TFAP2C	chr20_56638265	cg04773827	-0.0297206	0.00830542	0.24823	0.511625
TFAP2C	chr20_56638265	cg05013064	-0.00402424	-0.974463	0.892802	0.954697
TFAP2C	chr20_56638265	cg06630799	0.0107964	-0.395044	0.616404	0.831455
TFAP2C	chr20_56638265	cg07211212	0.193452	-1.57651	0.0628051	0.219568
TFAP2C	chr20_56638265	cg09077167	-0.043651	1.50467	0.684312	0.874663
TFAP2C	chr20_56638265	cg09183753	0.00340768	-0.765262	0.906372	0.962331
TFAP2C	chr20_56638265	cg09572195	0.0413368	-0.310586	0.150736	0.38882
TFAP2C	chr20_56638265	cg09662034	-0.0135118	0.330888	0.814062	0.926845
TFAP2C	chr20_56638265	cg09943716	-0.0537313	0.437025	0.197897	0.451832
TFAP2C	chr20_56638265	cg12521353	-0.172619	0.255738	0.0212365	0.101967
TFAP2C	chr20_56638265	cg15536490	0.0195042	-0.381692	0.258891	0.525156
TFAP2C	chr20_56638265	cg19107469	0.038066	-0.190076	0.135174	0.363297
TFAP2C	chr20_56638265	cg19694200	0.0298143	-0.575192	0.0346158	0.143616
TFAP2C	chr20_56638265	cg21469854	0.00641926	-0.214821	0.783097	0.910506
TFAP2C	chr20_56638265	cg21729992	0.0541415	-0.20169	0.453024	0.712024
TFAP2C	chr20_56638265	cg22907174	-0.0328929	-0.280877	0.552923	0.789362
TFAP2C	chr20_56638265	cg23662142	0.0375253	0.0603919	0.373946	0.640052
TFAP2C	chr20_56638265	cg24581326	-0.0344278	-0.543255	0.0478058	0.181055
TFAP2C	chr20_56638265	cg24864402	-0.0347933	-0.19036	0.185774	0.435
TFAP2C	chr20_56638265	cg26736540	-0.0142968	-0.564378	0.654267	0.859836
HMGN1	chr21_39345111	cg00297767	0.00264623	-0.267722	0.246473	0.510878
HMGN1	chr21_39345111	cg01619490	0.00340402	0.537063	0.360553	0.629679
HMGN1	chr21_39345111	cg01777187	-0.000133742	-1.81659	0.964466	0.986431
HMGN1	chr21_39345111	cg06560309	0.000503119	-0.706452	0.779058	0.907595
HMGN1	chr21_39345111	cg11337915	-0.000642441	-0.0182491	0.879749	0.951203
HMGN1	chr21_39345111	cg14518302	-0.000890125	-0.79343	0.56605	0.799852
HMGN1	chr21_39345111	cg18829411	0.00106752	-0.196314	0.61627	0.831455
HMGN1	chr21_39345111	cg24641125	0.0045212	-0.706949	0.369047	0.636798
HMGN1	chr21_39345111	cg25317233	-0.00478043	0.249454	0.177418	0.42054
PRKDC	chr8_47954350	cg00318618	0.00451424	-1.28139	0.888858	0.953682
PRKDC	chr8_47954350	cg01286191	-0.0409879	2.17606	0.558145	0.792285
PRKDC	chr8_47954350	cg02136250	-0.0309737	1.62175	0.617012	0.831455
PRKDC	chr8_47954350	cg02480772	-0.0518355	1.26342	0.221013	0.482636
PRKDC	chr8_47954350	cg02895394	-0.0315025	1.2735	0.536722	0.778808
PRKDC	chr8_47954350	cg04024910	0.0394274	0.508021	0.484614	0.737856
PRKDC	chr8_47954350	cg04894009	-0.0062166	1.72557	0.91113	0.962946
PRKDC	chr8_47954350	cg05416777	-0.0377332	1.57279	0.51767	0.767613
PRKDC	chr8_47954350	cg05669285	0.0308973	-0.700815	0.0732343	0.241975
PRKDC	chr8_47954350	cg07043604	-0.0524163	1.03551	0.578641	0.809195
PRKDC	chr8_47954350	cg07417733	0.0220938	-1.41301	0.529877	0.774889
PRKDC	chr8_47954350	cg09303136	-0.0860265	-1.32285	0.25114	0.515971
PRKDC	chr8_47954350	cg11220133	-0.0576169	-1.54131	0.475036	0.729815
PRKDC	chr8_47954350	cg11882144	-0.018269	-0.953673	0.503305	0.753395
PRKDC	chr8_47954350	cg12148237	0.0866929	0.393428	0.257179	0.523338
PRKDC	chr8_47954350	cg14189875	0.0075148	1.88114	0.846824	0.942944
PRKDC	chr8_47954350	cg14940760	-0.0323327	0.933533	0.463976	0.721866
PRKDC	chr8_47954350	cg16104446	0.0360156	-0.925915	0.350008	0.618911
PRKDC	chr8_47954350	cg17209887	-0.0265621	1.01718	0.732094	0.88811
PRKDC	chr8_47954350	cg17496794	-0.0844117	2.29981	0.270524	0.534831
PRKDC	chr8_47954350	cg17660110	0.0392141	-1.564	0.262128	0.530115
PRKDC	chr8_47954350	cg18317933	-0.0101705	2.57259	0.909181	0.962946
PRKDC	chr8_47954350	cg20197825	0.0400316	0.788119	0.55713	0.792285
PRKDC	chr8_47954350	cg21927637	-0.0496365	1.29422	0.302006	0.572216
PRKDC	chr8_47954350	cg22338356	0.0359569	0.358373	0.722562	0.886237
PRKDC	chr8_47954350	cg22691796	-0.00882353	-0.363789	0.775197	0.906828
PRKDC	chr8_47954350	cg22735324	0.0310707	1.45311	0.574639	0.807234
PRKDC	chr8_47954350	cg23000806	0.0781105	0.151995	0.340701	0.610026
PRKDC	chr8_47954350	cg23109897	0.0277471	-0.591647	0.507193	0.756547
PRKDC	chr8_47954350	cg24563317	0.0377236	-1.23299	0.2312	0.495081
PRKDC	chr8_47954350	cg24792272	-0.00453195	-0.866833	0.889706	0.953682
PRKDC	chr8_47954350	cg27320734	0.0501812	0.83337	0.73231	0.88811
PRKDC	chr8_47954350	ch_8_1077192R	-0.00693717	-0.332193	0.840578	0.939927
PRKDC	chr8_47954350	ch_8_1083168R	0.0155771	-0.699567	0.596214	0.817483
KIF13B	chr8_29204771	cg00328219	-0.00922756	0.175715	0.727527	0.88811
KIF13B	chr8_29204771	cg00936790	0.0359134	-0.557927	0.0576321	0.20667
KIF13B	chr8_29204771	cg00978855	0.0366537	0.01427	0.0630047	0.219788
KIF13B	chr8_29204771	cg01805427	0.0201399	0.283729	0.334916	0.606017
KIF13B	chr8_29204771	cg02000775	0.177804	-0.689338	4.35837e-05	0.000988926
KIF13B	chr8_29204771	cg02835742	-0.0200965	-0.568007	0.139393	0.37075
KIF13B	chr8_29204771	cg04022108	-0.0346915	-0.165027	0.0353669	0.145873
KIF13B	chr8_29204771	cg04025431	0.0400372	0.0478959	0.290116	0.555117
KIF13B	chr8_29204771	cg04905644	-0.0315047	0.243528	0.213826	0.473854
KIF13B	chr8_29204771	cg05196487	-0.0339424	0.83908	0.309718	0.580901
KIF13B	chr8_29204771	cg06043201	-0.00983901	0.101097	0.664624	0.864347
KIF13B	chr8_29204771	cg06178942	-0.0247326	-0.460937	0.440314	0.699755
KIF13B	chr8_29204771	cg06238667	0.057649	0.0662715	0.0173006	0.0891589
KIF13B	chr8_29204771	cg07023317	-0.00933577	0.668845	0.688497	0.875214
KIF13B	chr8_29204771	cg07058086	-0.000402866	-0.614928	0.993178	0.99817
KIF13B	chr8_29204771	cg07237653	-0.0435408	1.75365	0.335947	0.607143
KIF13B	chr8_29204771	cg07563765	0.0278032	1.33948	0.445587	0.703359
KIF13B	chr8_29204771	cg08296263	-0.0384449	0.326266	0.0916279	0.283336
KIF13B	chr8_29204771	cg09322573	-0.0431258	1.13861	0.166647	0.408884
KIF13B	chr8_29204771	cg09690373	0.0478893	-0.792822	0.00450438	0.0342707
KIF13B	chr8_29204771	cg09888753	-0.0571322	1.42446	0.412743	0.67535
KIF13B	chr8_29204771	cg10220156	0.00854862	-1.08344	0.630435	0.840799
KIF13B	chr8_29204771	cg10641504	0.0160287	-1.19637	0.348798	0.618477
KIF13B	chr8_29204771	cg10932125	0.0034321	0.732091	0.892888	0.954697
KIF13B	chr8_29204771	cg12508856	-0.0271119	0.854316	0.497807	0.752137
KIF13B	chr8_29204771	cg14895374	-0.0259854	0.424669	0.192524	0.444713
KIF13B	chr8_29204771	cg15139038	0.000390104	0.940243	0.986941	0.996411
KIF13B	chr8_29204771	cg16142313	-0.00109202	0.838446	0.978933	0.991697
KIF13B	chr8_29204771	cg16144590	-0.00745087	1.20958	0.797653	0.917945
KIF13B	chr8_29204771	cg16316695	0.034639	-1.33709	0.235678	0.500346
KIF13B	chr8_29204771	cg16821252	-0.0941775	2.59005	0.136213	0.365323
KIF13B	chr8_29204771	cg18875839	-0.00392467	-0.466845	0.738766	0.889958
KIF13B	chr8_29204771	cg19780614	-0.0242212	1.39434	0.281626	0.547421
KIF13B	chr8_29204771	cg19888654	0.0444727	1.01226	0.284652	0.550372
KIF13B	chr8_29204771	cg20024324	-0.00166026	0.885468	0.961069	0.986135
KIF13B	chr8_29204771	cg20147400	0.130991	-0.215216	0.00485297	0.0363831
KIF13B	chr8_29204771	cg20858437	0.016122	1.14898	0.420003	0.681143
KIF13B	chr8_29204771	cg22561384	-0.00948252	0.803781	0.711055	0.881829
KIF13B	chr8_29204771	cg23569415	0.0299774	-1.44813	0.374801	0.641087
KIF13B	chr8_29204771	cg23731836	0.0295855	-0.815776	0.0373917	0.152557
KIF13B	chr8_29204771	cg25596405	-0.0665649	1.23009	0.12504	0.342889
MTMR14	chr3_9688839	cg00341089	-0.0303868	1.84172	0.363186	0.632615
MTMR14	chr3_9688839	cg01964009	0.0286404	-1.38558	0.0101138	0.0614496
MTMR14	chr3_9688839	cg04475307	-0.00705108	1.34699	0.733122	0.888339
MTMR14	chr3_9688839	cg04828284	0.0236017	-1.53449	0.0133047	0.0747217
MTMR14	chr3_9688839	cg05498914	-0.0211401	2.02151	0.244367	0.507333
MTMR14	chr3_9688839	cg06726935	-0.0159397	-1.1404	0.443023	0.702047
MTMR14	chr3_9688839	cg07541442	0.0219257	-1.56626	0.107994	0.315277
MTMR14	chr3_9688839	cg09620606	0.00809305	1.4708	0.619888	0.833015
MTMR14	chr3_9688839	cg11559598	-0.0267863	1.3078	0.0154219	0.082531
MTMR14	chr3_9688839	cg13546514	-0.115272	2.94477	0.00386731	0.0305197
MTMR14	chr3_9688839	cg17309781	0.0135191	-0.954673	0.144512	0.378477
MTMR14	chr3_9688839	cg18809463	-0.00214734	0.720852	0.939032	0.974769
MTMR14	chr3_9688839	cg19596790	-0.0249294	-0.963208	0.17701	0.42054
MTMR14	chr3_9688839	cg20075304	0.0157232	-1.6143	0.251143	0.515971
MTMR14	chr3_9688839	cg20226230	0.0220212	0.137434	0.0579275	0.207439
MTMR14	chr3_9688839	cg20854025	0.0052554	-1.43699	0.600284	0.8188
MTMR14	chr3_9688839	cg21747617	-0.00190515	-1.38839	0.904194	0.960776
MTMR14	chr3_9688839	cg23044647	-0.0066924	-1.08756	0.521912	0.771393
MTMR14	chr3_9688839	cg26794364	-0.00643412	-0.161798	0.699596	0.878004
MTMR14	chr3_9688839	cg27298300	-0.00694716	0.895053	0.770112	0.903119
RFC4	chr3_186804505	cg00373256	0.0100227	1.24849	0.669952	0.865805
RFC4	chr3_186804505	cg00799353	0.00776036	-0.820591	0.433079	0.691847
RFC4	chr3_186804505	cg03434872	-0.0083115	-1.10441	0.561594	0.794661
RFC4	chr3_186804505	cg03446973	-0.0185738	-1.11183	0.2568	0.522982
RFC4	chr3_186804505	cg03852656	0.00882624	-0.0123373	0.641188	0.851674
RFC4	chr3_186804505	cg04120779	0.0721	-0.251363	0.00142811	0.0143595
RFC4	chr3_186804505	cg08440162	0.00829898	-1.16986	0.355423	0.623328
RFC4	chr3_186804505	cg09713000	-0.00572757	-1.27973	0.573754	0.806527
RFC4	chr3_186804505	cg10767703	-0.0205515	-1.42628	0.190067	0.441024
RFC4	chr3_186804505	cg12583908	0.0248053	-1.19964	0.0778079	0.253494
RFC4	chr3_186804505	cg12820191	0.0288634	-1.53994	0.0112381	0.0662057
RFC4	chr3_186804505	cg14742690	0.0159659	-1.02276	0.0740515	0.243733
RFC4	chr3_186804505	cg15427160	0.00243176	-2.05336	0.929707	0.9698
RFC4	chr3_186804505	cg19251352	0.0015501	-1.38139	0.907909	0.962331
RFC4	chr3_186804505	cg20872461	0.00950141	-1.04441	0.438726	0.698257
RFC4	chr3_186804505	cg25585523	0.016088	-0.836167	0.0788902	0.254771
RFC4	chr3_186804505	cg26099943	0.00226841	-1.9577	0.919354	0.966319
RFC4	chr3_186804505	cg27099625	-0.0112589	-1.43638	0.619723	0.833015
RFC4	chr3_186804505	cg27350326	0.0152829	0.742522	0.333263	0.603856
RFC4	chr3_186804505	cg27559724	0.0435612	-1.45393	0.0461984	0.176836
PALD1	chr10_70529209	cg00391031	-0.0105635	0.866126	0.521951	0.771393
PALD1	chr10_70529209	cg01464515	0.0460436	-0.649453	7.02373e-07	3.00147e-05
PALD1	chr10_70529209	cg04221624	0.00995	1.07566	0.65028	0.856107
PALD1	chr10_70529209	cg05768009	0.0241771	-0.549554	2.82833e-05	0.000677742
PALD1	chr10_70529209	cg06629767	-0.0249867	-0.985145	0.0100904	0.0614496
PALD1	chr10_70529209	cg10668980	-0.0378893	0.0647937	9.24923e-05	0.00178308
PALD1	chr10_70529209	cg12523878	-0.0331555	-1.27336	0.016477	0.085868
PALD1	chr10_70529209	cg13587449	-0.0210507	0.967892	0.0468426	0.178461
PALD1	chr10_70529209	cg14683490	0.0583623	0.074577	0.000282369	0.00438785
PALD1	chr10_70529209	cg15494405	0.00272626	-0.988819	0.688029	0.875214
PALD1	chr10_70529209	cg15546187	0.0183203	-1.2615	0.101236	0.3043
PALD1	chr10_70529209	cg16005828	-0.00957103	-0.498805	0.108663	0.315277
PALD1	chr10_70529209	cg16178622	0.0202341	1.04718	0.136144	0.365323
PALD1	chr10_70529209	cg16541444	0.0393838	0.261347	0.00764353	0.0505103
PALD1	chr10_70529209	cg16990532	0.00920501	-0.515315	0.126164	0.345602
PALD1	chr10_70529209	cg17239876	0.00152013	1.51441	0.970886	0.989016
PALD1	chr10_70529209	cg18776616	0.0527143	-0.317158	4.408e-05	0.000991413
PALD1	chr10_70529209	cg20418394	0.0445798	-0.50776	0.000170949	0.00286479
PALD1	chr10_70529209	cg20648333	0.0129701	0.578027	0.0690409	0.233845
PALD1	chr10_70529209	cg22643110	0.0231212	-0.456363	0.000140063	0.00244301
PALD1	chr10_70529209	cg23156059	-0.00873952	0.0531246	0.386523	0.652004
PALD1	chr10_70529209	cg23832814	-0.0131173	0.358179	0.0569832	0.204916
PALD1	chr10_70529209	cg24775327	-0.0287603	1.48767	0.306026	0.576102
PALD1	chr10_70529209	cg24812143	-0.0595937	2.60125	0.154586	0.395174
PALD1	chr10_70529209	cg25204955	0.0419425	-0.505567	1.04283e-05	0.000307336
PALD1	chr10_70529209	cg25256493	0.0423269	-0.330241	6.81849e-07	2.96315e-05
UHRF1BP1L	chr12_100102701	cg00395697	0.0262819	-1.35302	0.000301957	0.00455422
UHRF1BP1L	chr12_100102701	cg01474603	-0.0234633	-1.11657	0.0224966	0.106235
UHRF1BP1L	chr12_100102701	cg02392575	0.0188745	-0.527282	1.3887e-05	0.000391277
UHRF1BP1L	chr12_100102701	cg02927448	-0.00119089	0.137278	0.906677	0.962331
UHRF1BP1L	chr12_100102701	cg03823305	0.00114734	-1.35038	0.872101	0.951203
UHRF1BP1L	chr12_100102701	cg05319880	0.0131645	-0.794027	0.00346867	0.0281445
UHRF1BP1L	chr12_100102701	cg07744832	-0.0440062	1.19985	0.00236962	0.0211833
UHRF1BP1L	chr12_100102701	cg08805500	0.0213025	-0.0781043	0.241298	0.506415
UHRF1BP1L	chr12_100102701	cg10568931	-0.0214533	-1.70388	0.110685	0.319025
UHRF1BP1L	chr12_100102701	cg13014689	-0.00355217	1.23511	0.813819	0.926845
UHRF1BP1L	chr12_100102701	cg13959152	0.00677284	-1.09028	0.363928	0.633046
UHRF1BP1L	chr12_100102701	cg14292522	-0.0021335	-0.155309	0.85216	0.945042
UHRF1BP1L	chr12_100102701	cg16466203	0.00575711	-1.58092	0.424744	0.684503
UHRF1BP1L	chr12_100102701	cg16807101	-0.00440454	0.625899	0.826668	0.933927
UHRF1BP1L	chr12_100102701	cg16920991	0.0288791	-1.78028	0.0213671	0.102402
UHRF1BP1L	chr12_100102701	cg18961791	0.00779245	-1.32913	0.120162	0.335251
UHRF1BP1L	chr12_100102701	cg21336876	0.0166065	-1.52346	0.0981229	0.297033
UHRF1BP1L	chr12_100102701	cg22215783	-0.0190553	-0.977019	0.0241609	0.111428
UHRF1BP1L	chr12_100102701	cg23840562	0.00828936	-1.25153	0.138544	0.369258
KLC4	chr6_43054239	cg00415582	0.0279918	-0.94993	0.0861869	0.270481
KLC4	chr6_43054239	cg00553355	-0.117335	2.05371	0.0268361	0.11843
KLC4	chr6_43054239	cg00571421	0.00639251	-0.84917	0.643574	0.851897
KLC4	chr6_43054239	cg00656420	0.0437163	0.514672	0.122118	0.337702
KLC4	chr6_43054239	cg01082560	-0.0148695	2.5762	0.557282	0.792285
KLC4	chr6_43054239	cg01847614	0.0300066	-0.693473	0.00064966	0.008047
KLC4	chr6_43054239	cg02004621	-0.00274621	-1.24454	0.911963	0.962946
KLC4	chr6_43054239	cg03067660	0.00294211	-1.01096	0.87593	0.951203
KLC4	chr6_43054239	cg03547599	-0.0207572	-1.83731	0.568652	0.801552
KLC4	chr6_43054239	cg05107152	0.0177665	-0.831447	0.432964	0.691847
KLC4	chr6_43054239	cg06012509	0.0383835	-0.714568	0.0106973	0.0640839
KLC4	chr6_43054239	cg07099407	0.00139971	-0.404785	0.889042	0.953682
KLC4	chr6_43054239	cg07495357	0.0112847	-0.664859	0.473895	0.729332
KLC4	chr6_43054239	cg09526780	-0.00509914	0.631937	0.744721	0.891024
KLC4	chr6_43054239	cg10177591	0.0273427	-0.699288	0.00641191	0.0445532
KLC4	chr6_43054239	cg10194341	0.022376	-1.22865	0.0729921	0.241486
KLC4	chr6_43054239	cg12990575	-0.00113522	0.371676	0.928038	0.969332
KLC4	chr6_43054239	cg14251005	-0.0293611	0.907322	0.134552	0.362004
KLC4	chr6_43054239	cg14264489	0.00319018	0.612315	0.855899	0.947549
KLC4	chr6_43054239	cg15032444	0.0299724	-1.10091	0.0486221	0.183399
KLC4	chr6_43054239	cg15629134	-0.00484421	-1.74597	0.880693	0.951203
KLC4	chr6_43054239	cg16297435	0.0133993	-0.0465384	0.550802	0.78765
KLC4	chr6_43054239	cg16370701	-0.0147004	0.858926	0.343489	0.612452
KLC4	chr6_43054239	cg18159180	-0.0179763	0.364574	0.55845	0.792285
KLC4	chr6_43054239	cg22131825	0.0272485	-1.34704	0.0622186	0.219133
KLC4	chr6_43054239	cg23227932	-0.0155768	0.90489	0.378475	0.645219
KLC4	chr6_43054239	cg25002649	-0.0705245	1.25268	0.0833471	0.264483
KLC4	chr6_43054239	cg25042239	0.0158553	-2.00483	0.571088	0.804102
KLC4	chr6_43054239	cg25550677	-0.00895183	-0.838911	0.587492	0.812894
KLC4	chr6_43054239	cg25748712	-0.0048828	-1.14479	0.755109	0.895099
KLC4	chr6_43054239	cg25967419	0.038006	-1.14683	0.0250116	0.113696
KLC4	chr6_43054239	cg26585770	-0.00861188	-1.32978	0.675052	0.868893
ATXN7L1	chr7_105875628	cg00423035	-0.00854718	0.462869	0.840423	0.939927
ATXN7L1	chr7_105875628	cg00494287	0.0845795	0.117148	0.0585028	0.208915
ATXN7L1	chr7_105875628	cg02602423	0.00880171	2.64713	0.727806	0.88811
ATXN7L1	chr7_105875628	cg03199646	-0.0258359	0.872315	0.231712	0.495416
ATXN7L1	chr7_105875628	cg03511856	0.0321209	0.604636	0.393846	0.659365
ATXN7L1	chr7_105875628	cg03619256	-0.0273005	1.21035	0.293864	0.559367
ATXN7L1	chr7_105875628	cg03739378	-0.0217178	1.13073	0.582264	0.809612
ATXN7L1	chr7_105875628	cg03775459	-0.107683	1.13891	0.0757185	0.247947
ATXN7L1	chr7_105875628	cg05424831	-0.0339936	1.4555	0.39473	0.65981
ATXN7L1	chr7_105875628	cg05803296	-0.00105894	0.107829	0.973009	0.989605
ATXN7L1	chr7_105875628	cg06547017	0.0225269	0.711243	0.529981	0.774889
ATXN7L1	chr7_105875628	cg06564376	-0.0136592	1.24234	0.731401	0.88811
ATXN7L1	chr7_105875628	cg07714289	0.0551083	0.327562	0.104965	0.310775
ATXN7L1	chr7_105875628	cg08645907	0.000133972	0.0828113	0.995806	0.999118
ATXN7L1	chr7_105875628	cg09538676	0.024585	0.256475	0.617906	0.831659
ATXN7L1	chr7_105875628	cg10575219	-0.0146898	0.168853	0.601974	0.819617
ATXN7L1	chr7_105875628	cg11417235	0.0130949	1.04328	0.665693	0.864347
ATXN7L1	chr7_105875628	cg11617147	-0.0178197	-0.703365	0.277321	0.542919
ATXN7L1	chr7_105875628	cg11895696	-0.0528067	1.91394	0.64286	0.851674
ATXN7L1	chr7_105875628	cg11932891	0.00478459	0.391514	0.790829	0.914195
ATXN7L1	chr7_105875628	cg12845021	-0.0203018	0.546833	0.190675	0.441237
ATXN7L1	chr7_105875628	cg13007207	-0.0177702	0.0545861	0.497721	0.752137
ATXN7L1	chr7_105875628	cg13206850	-0.00185379	0.401255	0.917229	0.965902
ATXN7L1	chr7_105875628	cg13502686	0.0147885	0.919507	0.685777	0.874764
ATXN7L1	chr7_105875628	cg13556624	-0.0570344	1.49205	0.163472	0.406827
ATXN7L1	chr7_105875628	cg13759946	-0.0411345	0.908066	0.0122905	0.0708154
ATXN7L1	chr7_105875628	cg14427668	-0.0066393	0.202872	0.796782	0.917437
ATXN7L1	chr7_105875628	cg14548925	-0.00537844	-0.625077	0.672834	0.866908
ATXN7L1	chr7_105875628	cg14628819	-0.0119824	0.621905	0.474607	0.729815
ATXN7L1	chr7_105875628	cg14989988	-0.00881347	0.699785	0.793334	0.915853
ATXN7L1	chr7_105875628	cg15549637	-0.00177174	0.341787	0.928502	0.969332
ATXN7L1	chr7_105875628	cg15873112	0.0144914	0.894339	0.731941	0.88811
ATXN7L1	chr7_105875628	cg15910895	-0.036719	1.71146	0.147152	0.381109
ATXN7L1	chr7_105875628	cg16027132	0.000651341	0.591415	0.987504	0.996414
ATXN7L1	chr7_105875628	cg16114096	0.0199469	-0.701712	0.126897	0.346501
ATXN7L1	chr7_105875628	cg16797751	-0.0240723	0.692072	0.414709	0.676506
ATXN7L1	chr7_105875628	cg17242362	-0.117099	1.83831	0.0233293	0.108678
ATXN7L1	chr7_105875628	cg17331461	-0.00308338	-1.25362	0.833675	0.937276
ATXN7L1	chr7_105875628	cg17825274	-0.00152347	0.79461	0.980599	0.992208
ATXN7L1	chr7_105875628	cg18527241	-0.00616129	0.217694	0.857819	0.947823
ATXN7L1	chr7_105875628	cg18664667	-0.00322047	-0.298399	0.79847	0.918473
ATXN7L1	chr7_105875628	cg19053223	-0.00945035	0.484714	0.772056	0.904318
ATXN7L1	chr7_105875628	cg19894728	-0.0069266	0.980437	0.775766	0.906828
ATXN7L1	chr7_105875628	cg20186907	0.00327613	0.327548	0.882942	0.951203
ATXN7L1	chr7_105875628	cg20821442	-0.00702734	-0.120044	0.627095	0.839269
ATXN7L1	chr7_105875628	cg21095673	0.0155241	-0.0934548	0.364798	0.633708
ATXN7L1	chr7_105875628	cg21096457	0.00818562	1.179	0.776154	0.906828
ATXN7L1	chr7_105875628	cg21210285	-0.00146624	-0.75528	0.929456	0.9698
ATXN7L1	chr7_105875628	cg21830726	0.00872202	0.987851	0.793293	0.915853
ATXN7L1	chr7_105875628	cg22661239	1.38752e-05	-0.955286	0.99968	0.99979
ATXN7L1	chr7_105875628	cg22870295	-0.0307848	-0.054333	0.118217	0.33199
ATXN7L1	chr7_105875628	cg23275998	-0.0212997	1.67314	0.424149	0.684086
ATXN7L1	chr7_105875628	cg23419897	0.02132	1.39312	0.652339	0.858183
ATXN7L1	chr7_105875628	cg24235997	0.0253926	0.604262	0.406009	0.669457
ATXN7L1	chr7_105875628	cg24248505	-0.0733602	0.490521	0.145073	0.378786
ATXN7L1	chr7_105875628	cg25416719	0.00908346	1.00632	0.776321	0.906828
ATXN7L1	chr7_105875628	cg25652701	-0.00506717	0.493148	0.763281	0.900036
ATXN7L1	chr7_105875628	cg26780915	0.0125583	0.321277	0.397598	0.66264
ATXN7L1	chr7_105875628	cg26932690	0.0249476	1.48564	0.58092	0.809195
ATXN7L1	chr7_105875628	cg27056270	-0.0742008	0.724728	0.281957	0.547421
ATXN7L1	chr7_105875628	cg27485223	-0.0152129	-0.210491	0.527543	0.774889
ATXN7L1	chr7_105875628	cg27570992	-0.0567625	1.89356	0.18392	0.431052
NT5DC1	chr6_116106344	cg00436301	0.0222252	-1.19679	0.0189434	0.0943123
NT5DC1	chr6_116106344	cg01813649	0.00873039	-1.36439	0.524751	0.773254
NT5DC1	chr6_116106344	cg01820962	-0.052423	1.38774	0.0440731	0.171999
NT5DC1	chr6_116106344	cg05408873	0.00301817	0.918706	0.881206	0.951203
NT5DC1	chr6_116106344	cg06731021	-0.00933692	0.695569	0.242639	0.506415
NT5DC1	chr6_116106344	cg06734816	0.0186194	-0.805021	0.0319825	0.134874
NT5DC1	chr6_116106344	cg07472159	-0.0388546	1.41717	0.0804759	0.257603
NT5DC1	chr6_116106344	cg08036074	0.0133534	1.03571	0.434503	0.692827
NT5DC1	chr6_116106344	cg09604110	-0.0138506	-1.46562	0.406912	0.669839
NT5DC1	chr6_116106344	cg11539275	0.00269405	-1.46097	0.768029	0.902161
NT5DC1	chr6_116106344	cg15622783	0.00809347	-1.27557	0.350995	0.618949
NT5DC1	chr6_116106344	cg16074643	-0.0290358	1.1766	0.100105	0.301963
NT5DC1	chr6_116106344	cg16288099	-0.00601144	0.993772	0.714782	0.882935
NT5DC1	chr6_116106344	cg16420520	-0.0207723	1.30668	0.24712	0.511393
NT5DC1	chr6_116106344	cg16671877	0.0186827	-0.860876	0.0435231	0.170111
NT5DC1	chr6_116106344	cg17024952	-0.00457992	-0.648387	0.676125	0.869836
NT5DC1	chr6_116106344	cg17683211	-0.00886067	-0.618391	0.286127	0.550857
NT5DC1	chr6_116106344	cg18283893	0.00233493	-2.08656	0.874209	0.951203
NT5DC1	chr6_116106344	cg18494192	-0.0134876	1.29641	0.53007	0.774889
NT5DC1	chr6_116106344	cg19149898	0.0172364	-1.84099	0.170397	0.414245
NT5DC1	chr6_116106344	cg22658451	-0.0121626	0.693194	0.37574	0.641836
NT5DC1	chr6_116106344	cg25495311	-0.0105209	1.11604	0.658375	0.861263
NT5DC1	chr6_116106344	cg25598370	0.010248	-0.0472216	0.648197	0.854926
FXR1	chr3_180961448	cg00475787	0.037154	0.643928	0.133941	0.361386
FXR1	chr3_180975428	cg00475787	0.0274755	0.777534	0.111077	0.319025
FXR1	chr3_180961448	cg01816191	0.0289461	0.613731	0.414769	0.676506
FXR1	chr3_180975428	cg01816191	0.0513461	0.204418	0.0421248	0.166422
FXR1	chr3_180961448	cg03881214	0.0159324	-1.28729	0.0782457	0.253952
FXR1	chr3_180975428	cg03881214	0.00754835	-1.1646	0.255931	0.522839
FXR1	chr3_180961448	cg04436397	0.00779177	-1.03144	0.438405	0.698181
FXR1	chr3_180975428	cg04436397	0.0073788	-1.05258	0.282037	0.547421
FXR1	chr3_180961448	cg06382244	-0.0351582	-0.862558	0.0166138	0.0862301
FXR1	chr3_180975428	cg06382244	-0.0263012	-0.977055	0.0082287	0.0530373
FXR1	chr3_180961448	cg08121925	-0.0414772	0.43961	0.0694776	0.234648
FXR1	chr3_180975428	cg08121925	-0.0172326	0.149484	0.313276	0.583132
FXR1	chr3_180961448	cg08962590	0.0428508	-1.31407	0.00819551	0.0530373
FXR1	chr3_180975428	cg08962590	0.0171679	-1.00488	0.143114	0.376738
FXR1	chr3_180961448	cg12685548	-0.0281198	0.860949	0.370791	0.63841
FXR1	chr3_180975428	cg12685548	-0.00298226	0.494823	0.894243	0.955259
FXR1	chr3_180961448	cg14914887	-0.056744	1.09128	0.0769399	0.251304
FXR1	chr3_180975428	cg14914887	-0.0479607	0.93782	0.0486395	0.183399
FXR1	chr3_180961448	cg17302852	0.0212703	-0.941931	0.0265272	0.117674
FXR1	chr3_180975428	cg17302852	0.011798	-0.817083	0.094162	0.289673
FXR1	chr3_180961448	cg18555199	0.0148189	-0.881389	0.294945	0.561009
FXR1	chr3_180975428	cg18555199	0.00890753	-0.827288	0.352582	0.620427
FXR1	chr3_180961448	cg19678270	0.038507	-1.30197	0.0021703	0.0199449
FXR1	chr3_180975428	cg19678270	0.0320421	-1.20821	0.00037778	0.00538126
FXR1	chr3_180961448	cg20039713	-0.0189065	-0.880701	0.158719	0.400547
FXR1	chr3_180975428	cg20039713	-0.000189999	-1.13252	0.983026	0.994272
FXR1	chr3_180961448	cg27100806	0.0015428	-1.21804	0.901751	0.95932
FXR1	chr3_180975428	cg27100806	-0.00286463	-1.15125	0.739384	0.889958
FXR1	chr3_180961448	cg27437944	-0.0402852	-1.03193	0.11008	0.317845
FXR1	chr3_180975428	cg27437944	-0.0294421	-1.21758	0.108429	0.315277
SPAG16	chr2_213930215	cg00481499	-0.576449	4.99958	1.29094e-07	6.75505e-06
SPAG16	chr2_213930215	cg00707129	-0.0816458	1.25533	0.146151	0.380075
SPAG16	chr2_213930215	cg01099448	0.0451209	0.29191	0.141917	0.374742
SPAG16	chr2_213930215	cg01372071	-0.274469	2.44773	2.51221e-09	2.01291e-07
SPAG16	chr2_213930215	cg01606401	0.0707009	0.105885	0.152626	0.391725
SPAG16	chr2_213930215	cg05730975	0.106225	-1.0772	0.0194852	0.0957532
SPAG16	chr2_213930215	cg06098164	-0.197567	1.78076	6.20567e-07	2.74333e-05
SPAG16	chr2_213930215	cg07900766	-0.192654	1.51839	1.00855e-06	4.0405e-05
SPAG16	chr2_213930215	cg07965640	-0.239599	2.7051	1.04617e-09	8.94123e-08
SPAG16	chr2_213930215	cg11788289	-0.394291	3.12251	2.31925e-07	1.10122e-05
SPAG16	chr2_213930215	cg11990610	0.163586	-1.69519	0.00650582	0.0449621
SPAG16	chr2_213930215	cg12346504	-0.16332	1.36395	7.49877e-05	0.0015021
SPAG16	chr2_213930215	cg13507269	0.0509635	0.0695625	0.272138	0.535938
SPAG16	chr2_213930215	cg17842354	-0.190377	1.25737	5.10882e-05	0.00111009
SPAG16	chr2_213930215	cg18764015	-0.176894	1.46597	4.59849e-06	0.000151161
SPAG16	chr2_213930215	cg18859776	-0.0157737	1.08791	0.765941	0.900446
SPAG16	chr2_213930215	cg24664861	-0.2631	2.23471	3.07892e-08	1.87961e-06
SPAG16	chr2_213930215	cg24739407	0.0938287	-0.968717	0.0244657	0.112218
SPAG16	chr2_213930215	cg25073829	-0.230909	1.94091	7.37981e-08	4.02592e-06
SPAG16	chr2_213930215	cg25824236	0.140091	-1.42287	0.010071	0.0614496
SPAG16	chr2_213930215	cg26641148	0.138532	-0.663441	0.0137809	0.0763158
RALGAPB	chr20_38517489	cg00495442	0.0264565	-0.814628	0.000326362	0.00478166
RALGAPB	chr20_38562749	cg00495442	0.0298517	-0.782627	0.00823604	0.0530373
RALGAPB	chr20_38517489	cg00754426	0.0259577	-0.28387	0.0497195	0.185562
RALGAPB	chr20_38562749	cg00754426	0.0322696	-0.280011	0.0884478	0.275219
RALGAPB	chr20_38517489	cg01109256	-0.00924863	-0.449754	0.419135	0.680584
RALGAPB	chr20_38562749	cg01109256	-0.0119675	-0.457341	0.478314	0.732203
RALGAPB	chr20_38517489	cg01363736	-0.0349181	1.26814	0.0695525	0.234648
RALGAPB	chr20_38562749	cg01363736	-0.0639663	1.46823	0.0229207	0.107412
RALGAPB	chr20_38517489	cg03825236	-0.0146633	1.7809	0.371493	0.63841
RALGAPB	chr20_38562749	cg03825236	-0.00749098	1.68145	0.736803	0.889958
RALGAPB	chr20_38517489	cg04414928	0.00170268	-1.67643	0.884035	0.95136
RALGAPB	chr20_38562749	cg04414928	0.0186198	-1.88484	0.24889	0.512574
RALGAPB	chr20_38517489	cg08880538	0.0314469	-0.896124	8.57645e-06	0.000255698
RALGAPB	chr20_38562749	cg08880538	0.054456	-1.05521	6.34193e-08	3.53494e-06
RALGAPB	chr20_38517489	cg09113613	0.0181479	-0.842108	0.00963994	0.0592729
RALGAPB	chr20_38562749	cg09113613	0.035852	-0.978273	0.000513238	0.00672896
RALGAPB	chr20_38517489	cg09192732	-0.00294282	1.79657	0.867095	0.951203
RALGAPB	chr20_38562749	cg09192732	-0.0218987	1.96891	0.396476	0.661825
RALGAPB	chr20_38517489	cg11346764	-0.00101148	-1.78616	0.942333	0.977008
RALGAPB	chr20_38562749	cg11346764	-0.0263805	-1.51003	0.17837	0.421513
RALGAPB	chr20_38517489	cg12758922	0.034097	-0.999615	0.0159802	0.0844811
RALGAPB	chr20_38562749	cg12758922	0.0356695	-0.939963	0.0793945	0.255461
RALGAPB	chr20_38517489	cg14234805	0.0179653	-1.88549	0.327373	0.598278
RALGAPB	chr20_38562749	cg14234805	0.020743	-1.83304	0.423196	0.683297
RALGAPB	chr20_38517489	cg14853989	0.0275778	-1.55218	0.030003	0.129508
RALGAPB	chr20_38562749	cg14853989	0.0220941	-1.39627	0.196723	0.450356
RALGAPB	chr20_38517489	cg19057882	0.0358403	-0.874059	2.22855e-05	0.000577171
RALGAPB	chr20_38562749	cg19057882	0.0329601	-0.745703	0.00607828	0.0429331
RALGAPB	chr20_38517489	cg19257979	0.0320475	-1.06438	0.000996777	0.0109688
RALGAPB	chr20_38562749	cg19257979	0.0510964	-1.20637	0.00185113	0.0177764
RALGAPB	chr20_38517489	cg19480274	0.0529535	-0.112405	0.0972867	0.295899
RALGAPB	chr20_38562749	cg19480274	0.0272651	0.348409	0.557111	0.792285
RALGAPB	chr20_38517489	cg20073376	-0.000426327	1.63037	0.980412	0.992208
RALGAPB	chr20_38562749	cg20073376	0.0160911	1.43134	0.502665	0.753294
RALGAPB	chr20_38517489	cg23465989	-0.0226514	-1.53868	0.369065	0.636798
RALGAPB	chr20_38562749	cg23465989	-0.101622	-0.737922	0.00402897	0.0316283
RALGAPB	chr20_38517489	cg27595100	-0.0314202	1.63782	0.092958	0.286816
RALGAPB	chr20_38562749	cg27595100	0.00508614	1.12062	0.846958	0.942944
VOPP1	chr7_55497555	cg00513024	-0.0125446	1.4604	0.349737	0.618911
VOPP1	chr7_55497555	cg01407576	0.00601502	1.73	0.686096	0.874764
VOPP1	chr7_55497555	cg01691182	-0.0391237	-0.320238	0.0149757	0.0806675
VOPP1	chr7_55497555	cg02271926	-0.0956223	2.08668	0.000403621	0.00571759
VOPP1	chr7_55497555	cg03014829	-0.0940108	2.42903	0.0023147	0.0209845
VOPP1	chr7_55497555	cg03357999	-0.0366751	1.34364	0.199199	0.453996
VOPP1	chr7_55497555	cg04322486	0.00636038	0.078844	0.516905	0.767604
VOPP1	chr7_55497555	cg05170183	0.0225299	1.13495	0.371966	0.638488
VOPP1	chr7_55497555	cg05369274	0.0106867	-0.92884	0.453879	0.712644
VOPP1	chr7_55497555	cg05391282	0.0119067	0.879923	0.434444	0.692827
VOPP1	chr7_55497555	cg06750076	0.00284927	0.500196	0.731041	0.88811
VOPP1	chr7_55497555	cg06889086	-0.00801358	0.0942513	0.528303	0.774889
VOPP1	chr7_55497555	cg07006935	-0.0311613	0.214216	0.137697	0.367907
VOPP1	chr7_55497555	cg07459478	-0.0678326	1.15575	0.0196842	0.0965013
VOPP1	chr7_55497555	cg08337633	-0.0142182	0.37833	0.236154	0.500346
VOPP1	chr7_55497555	cg08352439	-0.0174603	0.32266	0.156976	0.399292
VOPP1	chr7_55497555	cg08655844	0.0135741	-0.467211	0.0032101	0.0269179
VOPP1	chr7_55497555	cg09286421	-0.00876247	0.83708	0.418679	0.680584
VOPP1	chr7_55497555	cg10011083	0.016044	-0.964926	0.0513377	0.189123
VOPP1	chr7_55497555	cg11738162	-0.0377764	-1.23541	0.00639643	0.0445532
VOPP1	chr7_55497555	cg12015615	0.0038568	0.546569	0.696043	0.877346
VOPP1	chr7_55497555	cg13860281	-0.0455012	0.461092	0.0148592	0.0802082
VOPP1	chr7_55497555	cg13987029	-0.0376743	1.70729	0.140232	0.371969
VOPP1	chr7_55497555	cg14876996	-0.00282264	0.846129	0.808797	0.924134
VOPP1	chr7_55497555	cg15035956	0.00408666	1.15933	0.850569	0.9444
VOPP1	chr7_55497555	cg15249221	-0.0098559	0.646304	0.368766	0.636798
VOPP1	chr7_55497555	cg15599795	-0.0478802	1.38788	0.0337974	0.141564
VOPP1	chr7_55497555	cg15902297	-0.00203731	0.325139	0.870067	0.951203
VOPP1	chr7_55497555	cg16182302	-0.0025663	0.788814	0.82277	0.930971
VOPP1	chr7_55497555	cg16248926	0.0122484	0.159093	0.182657	0.428876
VOPP1	chr7_55497555	cg16703135	-0.0157085	0.872559	0.576725	0.80893
VOPP1	chr7_55497555	cg18439810	0.00792487	0.566031	0.405865	0.669457
VOPP1	chr7_55497555	cg18693822	-0.0296367	0.0579594	0.0976193	0.296559
VOPP1	chr7_55497555	cg21959598	0.0156589	-0.358312	0.175867	0.419854
VOPP1	chr7_55497555	cg21983413	-0.0129745	1.53437	0.501127	0.753294
VOPP1	chr7_55497555	cg23654401	-0.0188441	0.356059	0.26468	0.531714
VOPP1	chr7_55497555	cg24399349	-0.0249693	0.883179	0.247538	0.511432
VOPP1	chr7_55497555	cg24430703	-0.00921342	0.570455	0.389964	0.655599
VOPP1	chr7_55497555	cg24529996	0.0199947	-1.3095	0.00301518	0.0258559
VOPP1	chr7_55497555	cg25065239	0.000519677	1.45962	0.976586	0.990493
VOPP1	chr7_55497555	cg25444344	0.0213285	-1.6286	0.071102	0.237377
VOPP1	chr7_55497555	cg25966908	-0.0183158	0.960217	0.4124	0.675219
VOPP1	chr7_55497555	cg26106590	-0.117493	2.06333	7.38834e-05	0.00149163
SPC24	chr19_11147909	cg00518527	-0.00140104	0.877733	0.873514	0.951203
SPC24	chr19_11147909	cg02272599	0.000704118	-0.343123	0.826839	0.933927
SPC24	chr19_11147909	cg02576701	0.00311997	-1.08025	0.103481	0.309176
SPC24	chr19_11147909	cg03567652	0.00162543	0.382643	0.517929	0.767613
SPC24	chr19_11147909	cg05614013	0.00443399	-0.487169	0.212979	0.472696
SPC24	chr19_11147909	cg07886195	-0.00825015	0.475538	0.236318	0.500346
SPC24	chr19_11147909	cg07905049	-0.00161477	-1.82056	0.68906	0.875373
SPC24	chr19_11147909	cg07962303	0.00459305	-0.297272	0.158256	0.400547
SPC24	chr19_11147909	cg08056863	-0.00507985	-2.55714	0.502686	0.753294
SPC24	chr19_11147909	cg08364677	0.00358408	-0.79169	0.172007	0.414889
SPC24	chr19_11147909	cg11835512	-3.57392e-05	-0.933628	0.989586	0.997758
SPC24	chr19_11147909	cg12516455	0.000105504	-1.6983	0.97776	0.9909
SPC24	chr19_11147909	cg13932035	0.00159431	-0.753518	0.526474	0.774889
SPC24	chr19_11147909	cg14431619	0.00819778	-1.00166	0.0189234	0.0943123
SPC24	chr19_11147909	cg22705114	-0.00122806	1.20146	0.794509	0.916157
SPC24	chr19_11147909	cg24786232	-0.00200752	-1.60554	0.581062	0.809195
NPTX2	chr7_98629437	cg00548268	-0.0912825	1.06791	6.83432e-05	0.00139073
NPTX2	chr7_98629437	cg01613455	-0.022455	-0.404461	0.259261	0.525491
NPTX2	chr7_98629437	cg02368096	0.0239204	-0.440423	0.0119777	0.0694813
NPTX2	chr7_98629437	cg04545556	0.0100895	-0.0421903	0.690395	0.876323
NPTX2	chr7_98629437	cg05168977	-0.0608836	0.61739	0.00145004	0.014484
NPTX2	chr7_98629437	cg07666532	0.0202555	-0.34451	0.0263763	0.117411
NPTX2	chr7_98629437	cg08315202	-0.341767	3.48296	1.95175e-05	0.000531005
NPTX2	chr7_98629437	cg09596818	-0.0662996	0.57541	2.05402e-05	0.000538507
NPTX2	chr7_98629437	cg10245879	-0.110109	1.14118	2.33049e-05	0.000591623
NPTX2	chr7_98629437	cg13314145	-0.314165	3.13868	2.69428e-05	0.000664243
NPTX2	chr7_98629437	cg13585675	0.115588	-1.12039	0.00130076	0.0133682
NPTX2	chr7_98629437	cg13695954	0.047587	-0.165895	0.339321	0.608405
NPTX2	chr7_98629437	cg13878520	0.0124438	0.126167	0.47833	0.732203
NPTX2	chr7_98629437	cg13951488	0.0291622	-0.229639	0.225775	0.488925
NPTX2	chr7_98629437	cg14089832	-0.0225319	0.800026	0.468832	0.724584
NPTX2	chr7_98629437	cg15750986	0.0331008	-0.763098	0.26485	0.531714
NPTX2	chr7_98629437	cg15903624	0.0726979	-0.594366	0.0127339	0.0725551
NPTX2	chr7_98629437	cg18952796	-0.475058	4.49514	2.12717e-07	1.02907e-05
NPTX2	chr7_98629437	cg20262683	0.0340656	-0.296903	0.0608316	0.215431
NPTX2	chr7_98629437	cg20266316	-0.17725	1.68721	2.51164e-05	0.000631282
NPTX2	chr7_98629437	cg20304727	0.0253321	-0.333331	0.146861	0.380759
NPTX2	chr7_98629437	cg20314490	0.00957188	-0.669549	0.571713	0.804541
NPTX2	chr7_98629437	cg21661022	0.0358541	-0.491958	0.108699	0.315277
PPM1B	chr2_44209432	cg00549896	-0.0677212	-0.0278047	0.228413	0.492656
PPM1B	chr2_44209432	cg03724754	-0.0354374	1.2364	0.644451	0.852177
PPM1B	chr2_44209432	cg04472547	0.0942226	-1.79437	0.102735	0.307725
PPM1B	chr2_44209432	cg04881214	0.120732	-2.18306	0.19298	0.444942
PPM1B	chr2_44209432	cg04920474	0.0125957	-0.747786	0.811337	0.925783
PPM1B	chr2_44209432	cg05764061	0.00560021	-0.795975	0.899389	0.959058
PPM1B	chr2_44209432	cg10084110	0.0721185	-1.45228	0.0310509	0.133135
PPM1B	chr2_44209432	cg13078911	0.063488	-0.0981511	0.356506	0.624372
PPM1B	chr2_44209432	cg19769080	-0.0258618	-0.00306293	0.834569	0.937276
PPM1B	chr2_44209432	cg19844724	0.0557037	-1.55974	0.366463	0.635347
PPM1B	chr2_44209432	cg20319604	0.120663	-0.878519	0.227121	0.490816
PPM1B	chr2_44209432	cg21119375	0.0766967	-0.468105	0.225203	0.488098
PPM1B	chr2_44209432	cg25371329	-0.085296	2.03096	0.421744	0.682671
PPM1B	chr2_44209432	cg26302994	0.0613723	-1.5313	0.268867	0.533571
PPM1B	chr2_44209432	cg26706909	0.0438574	-1.7209	0.479535	0.733229
PPM1B	chr2_44209432	cg26828767	-0.181547	3.43098	0.241416	0.506415
PPM1B	chr2_44209432	cg27361716	-0.00142342	-0.52971	0.974143	0.989974
IARS2	chr1_220096085	cg00578530	0.0479866	-1.49151	0.00433474	0.0333762
IARS2	chr1_220110771	cg00578530	0.0434068	-1.38745	0.00928016	0.0580349
IARS2	chr1_220096085	cg00719685	0.0592813	-1.64498	0.000464745	0.00623878
IARS2	chr1_220110771	cg00719685	0.0839592	-1.83745	3.05913e-07	1.40064e-05
IARS2	chr1_220096085	cg00784308	0.0528025	-1.29506	0.00636292	0.0444537
IARS2	chr1_220110771	cg00784308	0.0448058	-1.15093	0.0205518	0.0998007
IARS2	chr1_220096085	cg04168050	0.033786	-0.899326	0.00799527	0.0522956
IARS2	chr1_220110771	cg04168050	0.0198116	-0.70698	0.119394	0.334198
IARS2	chr1_220096085	cg06854438	0.0340069	-1.44595	0.0264286	0.11744
IARS2	chr1_220110771	cg06854438	0.0501647	-1.5867	0.000981865	0.0109688
IARS2	chr1_220096085	cg07017209	0.0410556	-1.33811	0.00909865	0.0571788
IARS2	chr1_220110771	cg07017209	0.020244	-1.07109	0.205955	0.464714
IARS2	chr1_220096085	cg10818272	0.00526252	-0.938112	0.719166	0.885658
IARS2	chr1_220110771	cg10818272	0.00388105	-0.926044	0.790783	0.914195
IARS2	chr1_220096085	cg11379360	0.0476295	-1.55775	0.0634444	0.220721
IARS2	chr1_220110771	cg11379360	0.0321589	-1.34177	0.208151	0.467747
IARS2	chr1_220096085	cg12763811	0.0320368	-0.777475	0.00199561	0.0188779
IARS2	chr1_220110771	cg12763811	0.0192683	-0.606279	0.0647533	0.224361
IARS2	chr1_220096085	cg14166846	0.0336592	-0.944325	0.0112581	0.0662057
IARS2	chr1_220110771	cg14166846	0.022847	-0.797111	0.0792112	0.255461
IARS2	chr1_220096085	cg17009631	0.0297487	-1.05716	0.0257913	0.115812
IARS2	chr1_220110771	cg17009631	0.0208576	-0.92622	0.11331	0.322321
IARS2	chr1_220096085	cg19707004	-0.0568948	2.20049	0.0145458	0.0795209
IARS2	chr1_220110771	cg19707004	-0.0380549	1.93306	0.0999858	0.301959
IARS2	chr1_220096085	cg20243626	0.0223132	-1.22152	0.131898	0.357113
IARS2	chr1_220110771	cg20243626	0.0201195	-1.17574	0.173253	0.416327
IARS2	chr1_220096085	cg23274377	0.0559815	-1.65697	0.0257688	0.115812
IARS2	chr1_220110771	cg23274377	0.072103	-1.76971	0.00386853	0.0305197
IARS2	chr1_220096085	cg23617067	-0.0228231	1.236	0.367022	0.635841
IARS2	chr1_220110771	cg23617067	-0.0377709	1.35792	0.134342	0.36182
IARS2	chr1_220096085	cg24124789	0.0306171	-1.05742	0.00530115	0.0387241
IARS2	chr1_220110771	cg24124789	0.0110674	-0.815917	0.302403	0.572223
IARS2	chr1_220096085	cg24256991	0.0506736	-0.980148	3.23069e-10	3.3134e-08
IARS2	chr1_220110771	cg24256991	0.0306761	-0.713321	0.000166117	0.00280212
IARS2	chr1_220096085	cg24658737	-0.0661467	1.85728	0.0192766	0.0952581
IARS2	chr1_220110771	cg24658737	-0.065421	1.76597	0.0210092	0.101065
IARS2	chr1_220096085	cg24941513	-0.0543012	-1.31953	0.167759	0.410577
IARS2	chr1_220110771	cg24941513	-0.0384045	-1.53508	0.318793	0.589319
IARS2	chr1_220096085	cg27059127	0.019106	-1.77526	0.367367	0.636008
IARS2	chr1_220110771	cg27059127	0.0543665	-2.11623	0.00956052	0.0591851
IARS2	chr1_220096085	cg27631248	0.0328826	-1.71582	0.0497055	0.185562
IARS2	chr1_220110771	cg27631248	0.0497666	-1.86437	0.00255438	0.0225067
WIPI2	chr7_5199689	cg00579868	0.0384939	0.274449	0.269466	0.533934
WIPI2	chr7_5199689	cg00703902	-0.00949996	1.25506	0.682289	0.873583
WIPI2	chr7_5199689	cg00731395	-0.0252298	0.958068	0.0109165	0.0650926
WIPI2	chr7_5199689	cg00761242	-0.0401587	1.54987	0.0897015	0.277771
WIPI2	chr7_5199689	cg01000248	0.00244607	1.689	0.909787	0.962946
WIPI2	chr7_5199689	cg01134459	-0.0258561	1.08747	0.326397	0.598201
WIPI2	chr7_5199689	cg01683969	-0.0222511	1.7217	0.241808	0.506415
WIPI2	chr7_5199689	cg01937399	0.00437386	2.29026	0.761959	0.900036
WIPI2	chr7_5199689	cg02667577	-0.0164876	0.650075	0.0917195	0.283336
WIPI2	chr7_5199689	cg02876211	0.0214313	1.53723	0.0882924	0.275174
WIPI2	chr7_5199689	cg03481159	-0.00758938	1.42185	0.750999	0.892843
WIPI2	chr7_5199689	cg04153882	-0.0072527	1.76515	0.867759	0.951203
WIPI2	chr7_5199689	cg05639533	0.0145882	-0.152306	0.247397	0.511432
WIPI2	chr7_5199689	cg06112732	-0.0172405	1.07948	0.151339	0.389593
WIPI2	chr7_5199689	cg06640364	0.010038	0.57877	0.679854	0.87255
WIPI2	chr7_5199689	cg07508942	0.0172802	2.49205	0.379533	0.646219
WIPI2	chr7_5199689	cg07762099	-0.0525087	1.41084	0.00189823	0.0180931
WIPI2	chr7_5199689	cg07839371	0.0146974	1.05481	0.46926	0.724809
WIPI2	chr7_5199689	cg08105951	0.0150104	-1.00885	0.220444	0.482187
WIPI2	chr7_5199689	cg08310400	-0.02876	1.8292	0.28606	0.550857
WIPI2	chr7_5199689	cg08891989	0.00754884	1.06687	0.751232	0.892843
WIPI2	chr7_5199689	cg09085524	0.000913584	0.877338	0.957791	0.985464
WIPI2	chr7_5199689	cg09203501	0.00452384	0.679107	0.832059	0.936934
WIPI2	chr7_5199689	cg09305948	0.00267302	0.716837	0.835612	0.937276
WIPI2	chr7_5199689	cg09523782	-0.00231654	0.735552	0.867414	0.951203
WIPI2	chr7_5199689	cg10739528	0.019213	-1.39775	0.0260017	0.11635
WIPI2	chr7_5199689	cg10791881	0.0190323	0.797795	0.353078	0.620427
WIPI2	chr7_5199689	cg11582546	0.00454732	-2.15262	0.805964	0.923449
WIPI2	chr7_5199689	cg11748186	0.0273538	-1.49392	0.00831777	0.0531839
WIPI2	chr7_5199689	cg12631105	-0.0267278	2.82274	0.0944402	0.289994
WIPI2	chr7_5199689	cg12927293	0.0011731	1.36899	0.955001	0.983895
WIPI2	chr7_5199689	cg13279019	-0.00382361	2.48105	0.869598	0.951203
WIPI2	chr7_5199689	cg13855729	-0.00626306	0.686239	0.548734	0.78765
WIPI2	chr7_5199689	cg14030593	0.121419	-0.804214	0.00269399	0.0235747
WIPI2	chr7_5199689	cg15277378	-0.00179317	2.05685	0.94864	0.979982
WIPI2	chr7_5199689	cg16035714	-0.0155398	1.78129	0.541763	0.7817
WIPI2	chr7_5199689	cg16497323	-0.0366393	1.76995	0.0399842	0.159453
WIPI2	chr7_5199689	cg16739198	-0.022344	-1.74371	0.288756	0.55417
WIPI2	chr7_5199689	cg17652756	-0.00590396	1.02712	0.697807	0.877585
WIPI2	chr7_5199689	cg20032693	-0.0111564	1.84524	0.61686	0.831455
WIPI2	chr7_5199689	cg20071624	0.00695503	0.902324	0.820737	0.929392
WIPI2	chr7_5199689	cg20099458	0.00218174	0.6263	0.835652	0.937276
WIPI2	chr7_5199689	cg20239604	-0.0195708	0.968993	0.0495953	0.185562
WIPI2	chr7_5199689	cg20367388	0.0250623	0.100213	0.278621	0.5445
WIPI2	chr7_5199689	cg21585409	-0.0234234	1.18984	0.269388	0.533934
WIPI2	chr7_5199689	cg21586865	0.0252385	-1.14653	0.00206193	0.0192247
WIPI2	chr7_5199689	cg21764632	-0.0285781	1.30586	0.124619	0.342837
WIPI2	chr7_5199689	cg22324696	-0.036301	1.71043	0.0687175	0.233058
WIPI2	chr7_5199689	cg22663933	-0.0112689	0.665197	0.38346	0.648453
WIPI2	chr7_5199689	cg23122899	-0.0285923	1.12402	0.0257596	0.115812
WIPI2	chr7_5199689	cg23562222	-0.000848454	0.491472	0.952702	0.982295
WIPI2	chr7_5199689	cg23783747	0.00424046	-1.77226	0.741727	0.889958
WIPI2	chr7_5199689	cg24555360	0.0297227	1.18287	0.0853971	0.26899
WIPI2	chr7_5199689	cg24872838	0.0121445	1.31454	0.672166	0.866482
WIPI2	chr7_5199689	cg25128194	0.0175518	-0.966626	0.048331	0.182774
WIPI2	chr7_5199689	cg25787131	-0.0227057	1.34868	0.140514	0.372189
WIPI2	chr7_5199689	cg26173562	0.00299637	1.30432	0.867062	0.951203
WIPI2	chr7_5199689	cg26660312	0.017723	0.983847	0.586893	0.812894
WIPI2	chr7_5199689	cg27021327	-0.0114934	0.563752	0.211416	0.471767
WIPI2	chr7_5199689	cg27152128	-0.0277728	1.26899	0.0714428	0.238204
WIPI2	chr7_5199689	cg27298603	-0.000640982	1.23603	0.966669	0.986588
ABCF1	chr6_30578077	cg00599401	-0.0241035	-0.699418	0.344925	0.613732
ABCF1	chr6_30578077	cg00678158	-0.00560594	-0.752726	0.889183	0.953682
ABCF1	chr6_30578077	cg01627201	-0.0765888	2.4518	0.170665	0.414245
ABCF1	chr6_30578077	cg01704860	-0.018398	1.97159	0.702933	0.879219
ABCF1	chr6_30578077	cg02086286	-0.147338	1.78295	0.000499427	0.00660068
ABCF1	chr6_30578077	cg02197677	-0.0636187	-1.4062	0.267307	0.533365
ABCF1	chr6_30578077	cg03020891	0.0321185	-0.175957	0.300541	0.569961
ABCF1	chr6_30578077	cg03239591	0.0262726	-1.05077	0.524339	0.773136
ABCF1	chr6_30578077	cg04292889	-0.0770806	1.6081	0.0502431	0.186161
ABCF1	chr6_30578077	cg04714201	0.00608628	-1.00122	0.827419	0.934171
ABCF1	chr6_30578077	cg05177685	-0.267971	2.91876	7.33947e-07	3.03665e-05
ABCF1	chr6_30578077	cg05385119	-0.0542917	-1.08122	0.27224	0.535938
ABCF1	chr6_30578077	cg05936555	0.059106	-1.1517	0.195356	0.448025
ABCF1	chr6_30578077	cg06140764	0.00350314	-2.15718	0.949602	0.98058
ABCF1	chr6_30578077	cg06241803	0.00768602	-1.121	0.782567	0.910506
ABCF1	chr6_30578077	cg06251929	0.0110088	-1.40093	0.856787	0.947823
ABCF1	chr6_30578077	cg07657521	-0.0179307	-1.8276	0.754482	0.895089
ABCF1	chr6_30578077	cg07983888	0.00507015	0.480227	0.881223	0.951203
ABCF1	chr6_30578077	cg08652722	0.0131798	0.344095	0.585408	0.811783
ABCF1	chr6_30578077	cg08805748	-0.0214089	-0.214293	0.593326	0.816237
ABCF1	chr6_30578077	cg09502511	-0.0557537	-1.72625	0.406616	0.669839
ABCF1	chr6_30578077	cg09664433	0.0335848	1.17634	0.658285	0.861263
ABCF1	chr6_30578077	cg10030624	-0.0309121	0.746488	0.361605	0.630289
ABCF1	chr6_30578077	cg10982113	-0.510317	5.91191	4.18846e-06	0.00013947
ABCF1	chr6_30578077	cg11606826	0.00103795	0.561023	0.976485	0.990493
ABCF1	chr6_30578077	cg12495593	-0.0127418	-1.98103	0.831326	0.936765
ABCF1	chr6_30578077	cg12716083	-0.112884	0.972279	0.000699318	0.00857919
ABCF1	chr6_30578077	cg13099117	0.0316576	-1.00899	0.529473	0.774889
ABCF1	chr6_30578077	cg14141448	-0.0249506	-0.272488	0.278133	0.543962
ABCF1	chr6_30578077	cg14793544	0.0495549	-0.946619	0.0618003	0.217959
ABCF1	chr6_30578077	cg14984210	-0.119227	2.63496	0.0800677	0.257216
ABCF1	chr6_30578077	cg16317730	0.0244545	-1.4007	0.658303	0.861263
ABCF1	chr6_30578077	cg16792604	0.0629569	-2.90967	0.329661	0.601173
ABCF1	chr6_30578077	cg17327665	0.00913525	0.725838	0.785018	0.910777
ABCF1	chr6_30578077	cg17365962	0.036144	-1.10979	0.342439	0.611856
ABCF1	chr6_30578077	cg17753711	-0.0109395	-1.71704	0.789286	0.913235
ABCF1	chr6_30578077	cg18015044	-0.00297449	-0.46833	0.91117	0.962946
ABCF1	chr6_30578077	cg18762252	-0.0544543	1.88493	0.465467	0.72273
ABCF1	chr6_30578077	cg19478711	0.0831686	0.0534937	0.225122	0.488098
ABCF1	chr6_30578077	cg20635067	-0.126757	2.17347	0.11777	0.331098
ABCF1	chr6_30578077	cg20738959	0.0296565	-0.874428	0.539402	0.780122
ABCF1	chr6_30578077	cg21227785	0.0580348	-1.29734	0.0187332	0.0941644
ABCF1	chr6_30578077	cg22409504	-0.227731	2.65538	0.000430324	0.00586888
ABCF1	chr6_30578077	cg22643189	0.0308829	-0.822215	0.408916	0.67209
ABCF1	chr6_30578077	cg22851514	-0.0392934	1.22152	0.401589	0.667319
ABCF1	chr6_30578077	cg22953267	0.0302515	0.0335092	0.42576	0.685278
ABCF1	chr6_30578077	cg23104816	-0.118133	1.91309	0.157879	0.400001
ABCF1	chr6_30578077	cg23657870	-0.0173576	-2.24355	0.796853	0.917437
ABCF1	chr6_30578077	cg24297727	-0.0447077	-0.0754136	0.0978734	0.296628
ABCF1	chr6_30578077	cg24448840	0.0858921	-1.19846	0.0114625	0.0670179
ABCF1	chr6_30578077	cg24529500	-0.0105761	0.795798	0.794062	0.916157
ABCF1	chr6_30578077	cg24946044	0.00579524	-0.917332	0.834278	0.937276
ABCF1	chr6_30578077	cg25315493	0.00549466	0.276879	0.883991	0.95136
ABCF1	chr6_30578077	cg25632840	-0.126653	1.79872	0.0664117	0.227951
ABCF1	chr6_30578077	cg26484464	0.0394573	0.0303874	0.13644	0.365551
ABCF1	chr6_30578077	cg26884376	-0.0168851	-0.459218	0.549114	0.78765
MSH6	chr2_47805602	cg00620552	0.00428011	-1.39449	0.494716	0.75012
MSH6	chr2_47805602	cg02053451	-0.00772012	1.19692	0.691607	0.876459
MSH6	chr2_47805602	cg02905881	-0.0112662	-0.759187	0.197393	0.451485
MSH6	chr2_47805602	cg04781916	-0.00725081	1.34363	0.735579	0.889634
MSH6	chr2_47805602	cg05039065	0.010046	-0.917093	0.143313	0.376877
MSH6	chr2_47805602	cg07262620	0.0192385	0.0345157	0.130274	0.353464
MSH6	chr2_47805602	cg07652213	-0.0307413	-1.98499	0.173701	0.41637
MSH6	chr2_47805602	cg09898070	-0.00535516	-0.41179	0.588816	0.813867
MSH6	chr2_47805602	cg11869233	0.000534657	-0.898596	0.941023	0.97644
MSH6	chr2_47805602	cg12482860	0.00564358	1.12981	0.712636	0.881829
MSH6	chr2_47805602	cg14296255	0.00599523	1.12517	0.743269	0.890117
MSH6	chr2_47805602	cg15355298	0.0124342	-0.66621	0.0812222	0.259668
MSH6	chr2_47805602	cg16979981	0.00496845	0.949341	0.711272	0.881829
MSH6	chr2_47805602	cg19076255	-0.00140309	-2.19634	0.936885	0.973705
MSH6	chr2_47805602	cg19570558	0.0329161	-0.340042	0.0473711	0.180207
MSH6	chr2_47805602	cg19736286	0.0273895	-1.1103	2.6224e-06	9.47019e-05
MSH6	chr2_47805602	cg21405109	0.0145444	-1.37851	0.0016291	0.0160039
MSH6	chr2_47805602	cg25828259	0.0231722	2.2996	0.0426369	0.167158
MSH6	chr2_47805602	ch_2_1149235F	0.0253359	-0.675635	0.00010112	0.00193138
MSH6	chr2_47805602	ch_2_47844995F	0.0123369	-0.801752	0.310981	0.580901
MSH6	chr2_47805602	ch_2_47848289F	0.00202473	-1.03633	0.727109	0.88811
PSMF1	chr20_1146291	cg00670253	0.0103515	0.193455	0.28294	0.548344
PSMF1	chr20_1146291	cg01583915	0.0114424	-0.0661443	0.157532	0.399914
PSMF1	chr20_1146291	cg02305853	-0.00771989	-0.023472	0.351745	0.619846
PSMF1	chr20_1146291	cg03340715	-0.0296461	0.127348	0.0450625	0.174532
PSMF1	chr20_1146291	cg03823108	0.0132941	-1.02334	0.284872	0.550372
PSMF1	chr20_1146291	cg05001453	-0.018917	-1.06943	0.327231	0.598278
PSMF1	chr20_1146291	cg05283538	-0.00435526	0.121393	0.556303	0.792285
PSMF1	chr20_1146291	cg06177446	-0.00521366	0.530553	0.697892	0.877585
PSMF1	chr20_1146291	cg06645286	-0.0696254	0.72126	0.0178173	0.0911846
PSMF1	chr20_1146291	cg07021394	0.00913408	-1.20487	0.46453	0.721899
PSMF1	chr20_1146291	cg07071379	0.00845927	0.352115	0.515905	0.766829
PSMF1	chr20_1146291	cg07209686	0.00629911	-0.354906	0.725134	0.887981
PSMF1	chr20_1146291	cg07471190	-0.00394667	0.545169	0.703012	0.879219
PSMF1	chr20_1146291	cg07598324	0.0460922	0.0721238	0.0349232	0.144658
PSMF1	chr20_1146291	cg07763967	-0.0347735	1.13121	0.133926	0.361386
PSMF1	chr20_1146291	cg08876934	-0.0245351	1.21673	0.179352	0.422663
PSMF1	chr20_1146291	cg10092546	0.0234107	-0.437128	0.00017306	0.00288134
PSMF1	chr20_1146291	cg10099900	0.0112299	0.172874	0.330108	0.601561
PSMF1	chr20_1146291	cg10482049	-0.00742392	-1.26977	0.599121	0.8188
PSMF1	chr20_1146291	cg13742159	-0.0125413	-0.963245	0.24129	0.506415
PSMF1	chr20_1146291	cg13791092	0.0170175	-0.291881	0.0110067	0.0653265
PSMF1	chr20_1146291	cg13861429	0.0201046	0.0553621	0.273427	0.537628
PSMF1	chr20_1146291	cg13972460	0.00244876	-0.15028	0.819263	0.928643
PSMF1	chr20_1146291	cg14905105	0.00598416	0.106091	0.52276	0.772094
PSMF1	chr20_1146291	cg15615350	0.0136692	-0.606285	0.126359	0.345767
PSMF1	chr20_1146291	cg16803707	0.0292696	-0.773683	0.000142145	0.00246257
PSMF1	chr20_1146291	cg16809280	0.00731438	0.289283	0.486661	0.73979
PSMF1	chr20_1146291	cg16812606	0.00415803	0.394024	0.691141	0.876459
PSMF1	chr20_1146291	cg17538991	-0.0133497	-0.895085	0.33261	0.603856
PSMF1	chr20_1146291	cg17702164	0.0154828	-0.749346	0.0361686	0.148616
PSMF1	chr20_1146291	cg18081300	0.0331389	0.0674826	0.108184	0.315277
PSMF1	chr20_1146291	cg18235353	0.017672	1.06703	0.133504	0.361082
PSMF1	chr20_1146291	cg19451221	-0.00978856	0.981762	0.503341	0.753395
PSMF1	chr20_1146291	cg21098856	0.00266565	-1.39085	0.879637	0.951203
PSMF1	chr20_1146291	cg23401212	-0.0120308	-1.21158	0.484205	0.737839
PSMF1	chr20_1146291	cg23672395	0.0191289	-0.938712	0.00279579	0.0242997
ERAP2	chr5_96895155	cg00703819	-0.0282498	2.05011	0.0455747	0.175456
ERAP2	chr5_96895155	cg09750775	0.00254549	-0.570804	0.845011	0.942413
ERAP2	chr5_96895155	cg11769360	0.00233115	1.29046	0.873061	0.951203
ERAP2	chr5_96895155	cg13331446	-0.0207965	1.85601	0.242428	0.506415
ERAP2	chr5_96895155	cg18880897	0.000786041	-0.32137	0.961576	0.986192
ERAP2	chr5_96895155	cg24598187	-0.0117031	1.4896	0.561354	0.794661
ERAP2	chr5_96895155	cg25583619	-0.0215659	1.1103	0.0955488	0.292412
ERAP2	chr5_96895155	cg26594503	-0.0246698	1.56015	0.15774	0.400001
RAB3GAP1	chr2_135129945	cg00714078	0.028594	-0.785616	0.0242148	0.111428
RAB3GAP1	chr2_135129945	cg03069665	0.0203224	-1.08736	0.0389777	0.157136
RAB3GAP1	chr2_135129945	cg03999653	0.0388246	-0.988582	2.67081e-08	1.71199e-06
RAB3GAP1	chr2_135129945	cg07898651	0.00864532	-1.15042	0.405313	0.669457
RAB3GAP1	chr2_135129945	cg08471896	0.0211531	0.819292	0.419276	0.680584
RAB3GAP1	chr2_135129945	cg12813922	0.0458903	-1.5479	0.0142027	0.0779777
RAB3GAP1	chr2_135129945	cg16944589	-0.0114741	-0.762655	0.481177	0.734622
RAB3GAP1	chr2_135129945	cg17339905	0.0120896	1.07054	0.688455	0.875214
RAB3GAP1	chr2_135129945	cg18312807	0.00441829	-0.721397	0.707502	0.881572
RAB3GAP1	chr2_135129945	cg20072241	0.0378151	-1.09664	0.000457856	0.00617864
RAB3GAP1	chr2_135129945	cg20949306	0.0343492	1.64541	0.0507068	0.187338
RAB3GAP1	chr2_135129945	cg20995127	0.0206461	0.70402	0.412358	0.675219
RAB3GAP1	chr2_135129945	cg24471039	-0.0139715	-0.683717	0.256248	0.522839
AL139353.1	chr14_31350761	cg00742472	0.0234389	-0.256908	0.160404	0.403415
AL139353.1	chr14_31350761	cg00832517	-0.00200638	-0.415923	0.899585	0.959058
AL139353.1	chr14_31350761	cg01358620	-0.0776001	1.4599	0.152329	0.391495
AL139353.1	chr14_31350761	cg01663052	-0.0176489	0.38553	0.81362	0.926845
AL139353.1	chr14_31350761	cg01743658	0.0116791	0.658415	0.725207	0.887981
AL139353.1	chr14_31350761	cg02042621	0.0144322	-0.976856	0.475379	0.729864
AL139353.1	chr14_31350761	cg03314644	0.000704382	-1.09217	0.971844	0.989205
AL139353.1	chr14_31350761	cg07570069	-0.0243513	0.997066	0.509287	0.758645
AL139353.1	chr14_31350761	cg10041119	-0.00956346	-0.331722	0.65573	0.860436
AL139353.1	chr14_31350761	cg11867950	0.00438436	-0.70325	0.858231	0.947823
AL139353.1	chr14_31350761	cg15998421	0.00406844	-0.58278	0.839337	0.939927
AL139353.1	chr14_31350761	cg15999332	0.0482209	0.970157	0.349941	0.618911
AL139353.1	chr14_31350761	cg16323892	-0.0205505	-1.14305	0.415277	0.676903
AL139353.1	chr14_31350761	cg16488300	-0.00196243	-1.85334	0.962106	0.986342
AL139353.1	chr14_31350761	cg20090429	0.00733251	0.89527	0.843634	0.941872
AL139353.1	chr14_31350761	cg21113592	-0.0144206	0.581692	0.749371	0.892843
AL139353.1	chr14_31350761	cg23517300	-0.00336012	0.608044	0.94159	0.976633
AL139353.1	chr14_31350761	cg25017988	-0.000894987	-1.13019	0.956159	0.984575
AL139353.1	chr14_31350761	cg25099807	0.0230202	-1.05487	0.333487	0.603856
AL139353.1	chr14_31350761	cg27019801	-0.0343857	-1.4981	0.39125	0.656522
KCNK1	chr1_233671922	cg00777689	0.0379511	-1.55916	0.504666	0.754498
KCNK1	chr1_233671922	cg02581587	0.0198375	0.317555	0.440314	0.699755
KCNK1	chr1_233671922	cg05638287	-0.00211862	-0.362004	0.894531	0.955259
KCNK1	chr1_233671922	cg09669625	0.0912324	0.193091	0.0216643	0.103248
KCNK1	chr1_233671922	cg11382055	-0.00142214	-0.482613	0.970029	0.988929
KCNK1	chr1_233671922	cg11815363	0.0184219	-0.576784	0.26489	0.531714
KCNK1	chr1_233671922	cg13110283	0.0184015	-0.329006	0.405463	0.669457
KCNK1	chr1_233671922	cg14249872	-0.0209961	-0.443758	0.382065	0.647893
KCNK1	chr1_233671922	cg14853341	0.010125	0.303532	0.55869	0.792285
KCNK1	chr1_233671922	cg15108705	0.040726	-1.10045	0.105112	0.31085
KCNK1	chr1_233671922	cg15203632	0.0504012	0.264551	0.263583	0.531714
KCNK1	chr1_233671922	cg16676775	0.0269999	-0.0675956	0.57866	0.809195
KCNK1	chr1_233671922	cg17459431	0.0100115	-1.09473	0.713642	0.882246
KCNK1	chr1_233671922	cg17851113	-0.000430137	0.629547	0.991067	0.99817
KCNK1	chr1_233671922	cg20947082	-0.0362681	-0.323046	0.590255	0.814573
KCNK1	chr1_233671922	cg24809845	0.0413387	0.132408	0.0673954	0.229484
KCNK1	chr1_233671922	cg25154916	0.0269035	-0.676814	0.11257	0.321413
KCNK1	chr1_233671922	cg25191850	0.0581282	-1.46645	0.289648	0.554636
KCNK1	chr1_233671922	cg26421554	0.0138823	0.868142	0.770328	0.903119
PDS5A	chr4_39926867	cg00780250	-0.0216457	-2.17695	0.567486	0.800789
PDS5A	chr4_39926867	cg00906147	0.0226736	-0.892036	0.106776	0.31396
PDS5A	chr4_39926867	cg02687543	-0.00517398	1.11911	0.836357	0.937656
PDS5A	chr4_39926867	cg05733703	-0.00803513	0.0835666	0.598458	0.8188
PDS5A	chr4_39926867	cg07476944	0.0103548	-1.63393	0.720299	0.885812
PDS5A	chr4_39926867	cg11285937	0.0303141	-0.830897	0.00110139	0.0119659
PDS5A	chr4_39926867	cg14009745	0.0391508	-1.61065	0.000429856	0.00586888
PDS5A	chr4_39926867	cg14410516	-0.0324726	1.46671	0.307079	0.577237
PDS5A	chr4_39926867	cg15003695	0.0580719	-1.40413	4.30331e-05	0.00098515
PDS5A	chr4_39926867	cg15454383	0.0178852	-0.931534	0.243579	0.506471
PDS5A	chr4_39926867	cg17348730	0.019651	-1.24982	0.0827402	0.263485
PDS5A	chr4_39926867	cg17542806	-0.0101572	1.12336	0.680499	0.87255
PDS5A	chr4_39926867	cg17815841	0.0444409	-0.862859	1.08283e-11	1.85091e-09
PDS5A	chr4_39926867	cg21904978	0.0574787	-2.236	0.016595	0.0862301
PDS5A	chr4_39926867	cg23978513	0.00960981	-2.31243	0.779101	0.907595
PDS5A	chr4_39926867	cg24438217	0.0219843	-0.0319912	0.336165	0.607143
PDS5A	chr4_39926867	cg25368887	0.0334379	-0.105405	0.0628562	0.219568
PDS5A	chr4_39926867	cg25710351	0.0437373	-1.75225	0.0158497	0.0841253
MEIS1	chr2_66568967	cg00809338	-0.0603343	1.80639	0.0466286	0.17791
MEIS1	chr2_66568967	cg00995986	-0.148895	1.07148	0.000864554	0.0102103
MEIS1	chr2_66568967	cg01271812	-0.0769049	0.565762	0.0371043	0.151974
MEIS1	chr2_66568967	cg01406988	0.0113782	-0.802006	0.59028	0.814573
MEIS1	chr2_66568967	cg01721544	0.0144409	-0.0587361	0.368964	0.636798
MEIS1	chr2_66568967	cg01863674	0.0591256	0.357905	0.114606	0.324696
MEIS1	chr2_66568967	cg02209932	0.0300014	-0.704434	2.77843e-06	9.89431e-05
MEIS1	chr2_66568967	cg02551743	-0.0708672	0.524253	0.0192251	0.0952581
MEIS1	chr2_66568967	cg02609473	0.0422864	-1.0126	1.22599e-05	0.000353194
MEIS1	chr2_66568967	cg03589296	-0.061797	0.289355	0.00761977	0.0505103
MEIS1	chr2_66568967	cg04288999	-0.0783061	0.420686	0.00496087	0.037041
MEIS1	chr2_66568967	cg04732596	0.0141145	0.362865	0.697833	0.877585
MEIS1	chr2_66568967	cg04751149	-0.073387	0.537957	0.0167604	0.0867128
MEIS1	chr2_66568967	cg04768935	0.0482748	-0.778098	0.00235785	0.0211833
MEIS1	chr2_66568967	cg04941313	0.0472308	0.219999	0.0781978	0.253952
MEIS1	chr2_66568967	cg05098471	0.0393939	-1.30323	0.00376258	0.0299604
MEIS1	chr2_66568967	cg05180985	0.00804891	-0.869171	0.541537	0.7817
MEIS1	chr2_66568967	cg05496203	-0.138768	0.68586	0.000780099	0.00939049
MEIS1	chr2_66568967	cg05877497	-0.248116	1.6206	0.000316945	0.00469738
MEIS1	chr2_66568967	cg05930133	0.00225984	-1.35224	0.866367	0.951203
MEIS1	chr2_66568967	cg06651878	0.00428394	-0.858703	0.729919	0.88811
MEIS1	chr2_66568967	cg06796713	-0.088845	0.478393	0.00430066	0.0332732
MEIS1	chr2_66568967	cg06833110	-0.252879	1.91303	0.00374729	0.0299604
MEIS1	chr2_66568967	cg06919693	-0.0291638	0.726095	0.33696	0.607143
MEIS1	chr2_66568967	cg06994420	-0.0994025	0.704656	0.00799169	0.0522956
MEIS1	chr2_66568967	cg07103068	-0.04576	1.32943	0.0538829	0.196803
MEIS1	chr2_66568967	cg07809589	-0.094834	0.467494	0.00157664	0.0155481
MEIS1	chr2_66568967	cg07849384	0.0410171	-0.749508	0.018356	0.0931978
MEIS1	chr2_66568967	cg08225529	-0.00210755	-0.785891	0.881048	0.951203
MEIS1	chr2_66568967	cg08238215	-0.0893244	0.672545	0.00890988	0.0561307
MEIS1	chr2_66568967	cg09170232	-0.0898742	1.86885	0.00126968	0.01318
MEIS1	chr2_66568967	cg09462924	-0.223753	0.983648	0.000806351	0.00963905
MEIS1	chr2_66568967	cg09535924	-0.0981781	0.584901	0.014717	0.0797767
MEIS1	chr2_66568967	cg09550083	-0.14249	1.22424	0.0121792	0.0704907
MEIS1	chr2_66568967	cg10010036	0.0393178	-0.362428	0.145707	0.380055
MEIS1	chr2_66568967	cg10464312	-0.0604111	0.512632	0.0187668	0.0941644
MEIS1	chr2_66568967	cg10633966	0.0260666	-1.02633	0.0393291	0.157562
MEIS1	chr2_66568967	cg10725390	0.037327	-0.419325	0.246713	0.510963
MEIS1	chr2_66568967	cg10835286	0.106907	-1.24879	2.65373e-08	1.71199e-06
MEIS1	chr2_66568967	cg11357542	-0.117505	1.25132	0.0128334	0.0729598
MEIS1	chr2_66568967	cg11433622	-0.268507	1.53774	0.000616872	0.00790105
MEIS1	chr2_66568967	cg12055515	-0.043043	0.092806	0.0163226	0.0855708
MEIS1	chr2_66568967	cg12082609	-0.0787013	0.660084	0.0248345	0.113504
MEIS1	chr2_66568967	cg12975220	0.0477798	-1.41569	0.00014729	0.002501
MEIS1	chr2_66568967	cg14553338	-0.114644	1.62561	0.00150274	0.0148765
MEIS1	chr2_66568967	cg14775296	-0.179115	0.813886	0.00187282	0.0179176
MEIS1	chr2_66568967	cg14836490	-0.0910978	1.51214	0.0423913	0.166704
MEIS1	chr2_66568967	cg15978039	-0.0191054	-0.117484	0.534735	0.776804
MEIS1	chr2_66568967	cg16178603	-0.339483	1.79668	8.99719e-05	0.00174764
MEIS1	chr2_66568967	cg16927242	-0.0936768	0.498964	0.00588588	0.0420373
MEIS1	chr2_66568967	cg17107572	-0.119511	0.652397	0.00145178	0.014484
MEIS1	chr2_66568967	cg17454831	-0.0577724	0.156321	0.0700783	0.236111
MEIS1	chr2_66568967	cg17945976	-0.15103	0.75237	0.00134727	0.013708
MEIS1	chr2_66568967	cg19572637	0.0014556	-0.703595	0.935648	0.972831
MEIS1	chr2_66568967	cg20056634	-0.107108	1.60948	0.0012682	0.01318
MEIS1	chr2_66568967	cg20691283	0.0375748	-0.885782	5.95438e-05	0.00124122
MEIS1	chr2_66568967	cg21467252	0.0108677	-0.913542	0.375736	0.641836
MEIS1	chr2_66568967	cg21992238	0.0399341	-1.22751	0.0994053	0.30056
MEIS1	chr2_66568967	cg22731271	-0.264908	1.74394	5.92501e-05	0.00124122
MEIS1	chr2_66568967	cg23279522	0.0784262	-1.35645	0.106553	0.313666
MEIS1	chr2_66568967	cg23398076	-0.254717	1.67184	6.25846e-05	0.00128374
MEIS1	chr2_66568967	cg23497016	-0.143962	0.676557	0.00066831	0.0082382
MEIS1	chr2_66568967	cg23972738	-0.1075	0.705642	0.00622338	0.0437171
MEIS1	chr2_66568967	cg24421216	-0.0941919	0.857376	0.0208138	0.100873
MEIS1	chr2_66568967	cg25721451	-0.0340694	-1.35769	0.280379	0.546686
MEIS1	chr2_66568967	cg26482052	0.0340447	-0.897872	0.0395176	0.15807
MEIS1	chr2_66568967	cg26537478	-0.167445	0.990306	0.000885979	0.0103257
MEIS1	chr2_66568967	cg26691604	0.0295173	-0.96134	0.0372636	0.152383
MEIS1	chr2_66568967	cg27400113	-0.0785893	1.40546	0.0173616	0.089209
DCAF10	chr9_37819179	cg00826610	0.00392606	-0.455631	0.641923	0.851674
DCAF10	chr9_37819179	cg04660234	-0.00965322	-0.387871	0.404194	0.669118
DCAF10	chr9_37819179	cg13737042	0.01194	-0.177685	0.360764	0.629679
DCAF10	chr9_37819179	cg13944395	0.0132897	-0.861455	0.268561	0.533474
DCAF10	chr9_37819179	cg14364844	-0.0242957	0.976104	0.456633	0.715214
DCAF10	chr9_37819179	cg21252725	0.0203515	-0.61784	0.170555	0.414245
DCAF10	chr9_37819179	cg26233529	0.0251211	-2.06251	0.422605	0.682772
MLH1	chr3_36990443	cg00893636	-0.111065	0.903116	0.00167042	0.016285
MLH1	chr3_36990443	cg02103401	0.018292	0.134913	0.598581	0.8188
MLH1	chr3_36990443	cg02279071	-0.0949911	0.786625	0.0670458	0.229412
MLH1	chr3_36990443	cg03192963	-0.141947	1.1213	0.0011536	0.0122732
MLH1	chr3_36990443	cg03405026	0.0371582	0.606048	0.0962382	0.293756
MLH1	chr3_36990443	cg03497419	-0.161133	1.2967	0.00403372	0.0316283
MLH1	chr3_36990443	cg03901257	-0.0758358	0.658199	0.111207	0.319025
MLH1	chr3_36990443	cg04726821	-0.0319675	0.434622	0.507814	0.756997
MLH1	chr3_36990443	cg04841293	-0.0524874	0.44066	0.186975	0.436219
MLH1	chr3_36990443	cg05670953	-0.0496505	0.679544	0.333171	0.603856
MLH1	chr3_36990443	cg05845319	-0.0535677	0.561115	0.171351	0.414889
MLH1	chr3_36990443	cg05906740	-0.240357	1.81062	8.44399e-05	0.00166542
MLH1	chr3_36990443	cg06108510	-0.231085	2.03959	0.00013077	0.00231237
MLH1	chr3_36990443	cg06590608	-0.410242	3.30857	4.29434e-05	0.00098515
MLH1	chr3_36990443	cg06791151	-0.291029	2.21096	0.000415827	0.00578421
MLH1	chr3_36990443	cg07064226	-0.199701	1.81204	6.06123e-05	0.00125331
MLH1	chr3_36990443	cg07101782	-0.342315	2.57108	0.00749355	0.0501657
MLH1	chr3_36990443	cg10769891	-0.134959	0.985541	0.010889	0.0650803
MLH1	chr3_36990443	cg10990993	-0.0399518	0.742437	0.28506	0.550372
MLH1	chr3_36990443	cg11224603	-0.27309	2.15414	0.000112714	0.00207913
MLH1	chr3_36990443	cg11291081	-0.0347064	0.446823	0.40213	0.667786
MLH1	chr3_36990443	cg11363877	0.0483358	0.551284	0.0501112	0.186161
MLH1	chr3_36990443	cg11600697	-0.135397	1.1456	0.000995363	0.0109688
MLH1	chr3_36990443	cg12790037	-0.0976186	0.790164	0.000315114	0.00469738
MLH1	chr3_36990443	cg12851504	-0.200837	1.56232	3.66803e-05	0.000854986
MLH1	chr3_36990443	cg13846866	-0.194932	1.84519	0.000492375	0.00654119
MLH1	chr3_36990443	cg14598950	-0.17585	1.40713	0.000912794	0.0104951
MLH1	chr3_36990443	cg14671526	-0.300334	2.42829	0.00011213	0.00207913
MLH1	chr3_36990443	cg14751544	-0.0736483	0.668901	0.0294194	0.127633
MLH1	chr3_36990443	cg16433211	-0.241699	1.93577	0.000625559	0.00790115
MLH1	chr3_36990443	cg16764580	-0.125206	0.788892	0.0515337	0.189303
MLH1	chr3_36990443	cg16863190	-0.0026246	0.871738	0.918435	0.965902
MLH1	chr3_36990443	cg17024523	0.0943844	-0.407168	0.00333727	0.0274255
MLH1	chr3_36990443	cg17621259	-0.435965	3.53534	4.07295e-06	0.000137408
MLH1	chr3_36990443	cg17641046	-0.111257	0.956913	0.0129164	0.0732689
MLH1	chr3_36990443	cg18320188	-0.0216645	0.230036	0.419392	0.680584
MLH1	chr3_36990443	cg19132762	-0.201756	1.48765	0.0065489	0.0450735
MLH1	chr3_36990443	cg19208331	-0.177736	1.47481	0.00029439	0.00449295
MLH1	chr3_36990443	cg21109167	-0.0311598	0.406781	0.444647	0.703359
MLH1	chr3_36990443	cg21490561	-0.136842	1.06192	0.00410676	0.0321028
MLH1	chr3_36990443	cg23658326	-0.209014	1.64159	0.00273801	0.0238785
MLH1	chr3_36990443	cg24607398	-0.0811475	1.36828	0.161883	0.404634
MLH1	chr3_36990443	cg24985459	-0.22933	1.86238	0.000129754	0.00231034
MLH1	chr3_36990443	cg25202636	-0.15703	1.36013	0.000419604	0.00578421
MLH1	chr3_36990443	cg25212762	0.0309579	0.549452	0.176997	0.42054
MLH1	chr3_36990443	cg25837710	-0.44273	3.56295	1.8366e-06	7.02842e-05
[truncated: 963 more rows]
